# Supplementary material for: 生命のパンと聖餐 : ヨハネ六・五一-五八について
Source: MDPI journal article supplement (doi:10.3390/plants13050646), 1969-02-20
Supplement: s1 [file s1]

## Supplementary Materials

# Rosmarinic Acid Present in *Lepechinia floribunda* and *Lepechinia meyenii* As A Potent Inhibitor of the Adenylyl Cyclase gNC1 from *Giardia lamblia*

Adolfo Zurita <sup>1,†,\*</sup>, Esteban Vega Hissi <sup>1</sup>, Agostina Cianci Romero <sup>1</sup>, Adela María Luján <sup>2</sup>, Sofía Salido <sup>3</sup>, Agustín Yaneff <sup>4</sup>, Carlos Davio <sup>4</sup>, Justo Cobo <sup>3</sup>, María Cecilia Carpinella <sup>2,†,\*</sup> and Ricardo Daniel Enriz <sup>1,†,\*</sup>

<sup>1</sup> Facultad de Química, Bioquímica y Farmacia, Universidad Nacional de San Luis, Instituto Multidisciplinario de Investigaciones Biológicas (IMIBIO-SL), Ejército de los Andes 950, San Luis 5700, Argentina; egvega@gmail.com (E.V.H.); agostinacianci.acr@gmail.com (A.C.R.)

<sup>2</sup> Laboratorio de Química Fina y Productos Naturales, Centro de Investigación y Desarrollo en Inmunología y Enfermedades Infecciosas (CIDIE) CONICET-UCC, Universidad Católica de Córdoba, Córdoba, Avda. Armada Argentina 3555, Córdoba X5016DHK, Argentina; adem.lujan@gmail.com

<sup>3</sup> Departamento de Química Inorgánica y Orgánica, Universidad de Jaén, Campus Las Lagunillas s/n, 23071 Jaén, Spain; ssalido@ujaen.es (S.S.); jcobo@ujaen.es (J.C.)

<sup>4</sup> Instituto de Investigaciones Farmacológicas (ININFA-UBA-CONICET), Facultad de Farmacia y Bioquímica, Universidad de Buenos Aires, Junín 956, Buenos Aires C1113AAD, Argentina; agustinyaneff@hotmail.com (A.Y.); carlosdavio@hotmail.com (C.D.)

\* Correspondence: azurita1974@gmail.com (A.Z.); ceciliacarpinella@ucc.edu.ar (M.C.C.); danielenriz@gmail.com (R.D.E.)

† These authors contributed equally to this work.

a)

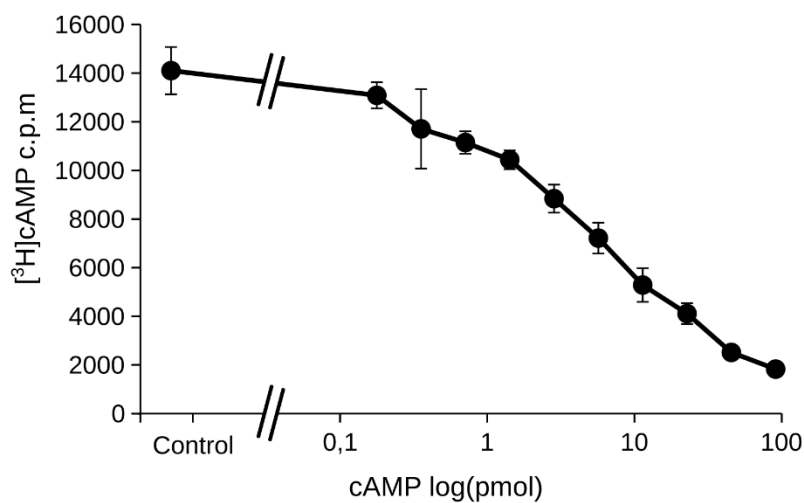

b)

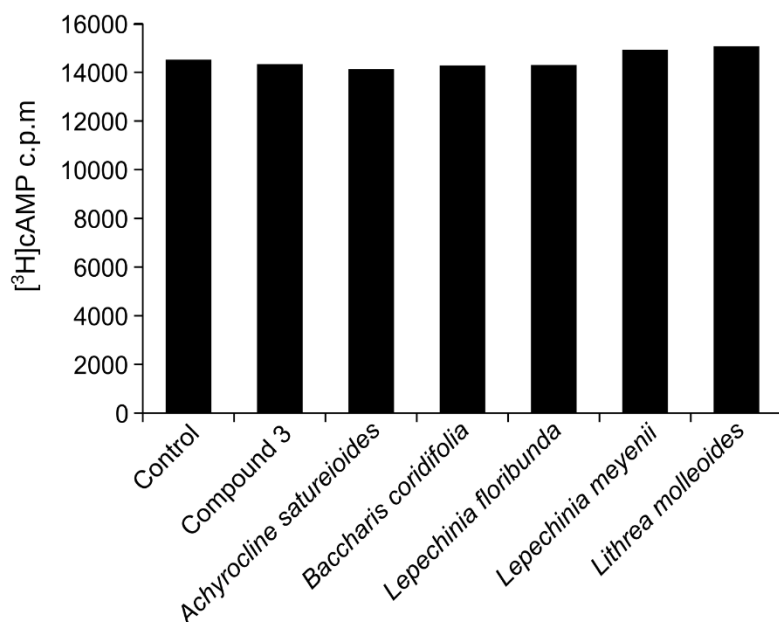

**Figure S1.** The controls for the Radiobinding-Protein (RBP) assay were conducted under the specified conditions: (a) in the presence of increasing concentrations of cAMP, and (b) in the presence of DMSO (negative control), 50  $\mu$ M of rosmarinic acid (**3**) or 250  $\mu$ g/mL of the target plant extracts. The results obtained showed that these inhibitors did not interfere with the binding between cAMP and the protein kinase A used in the RBP buffer.

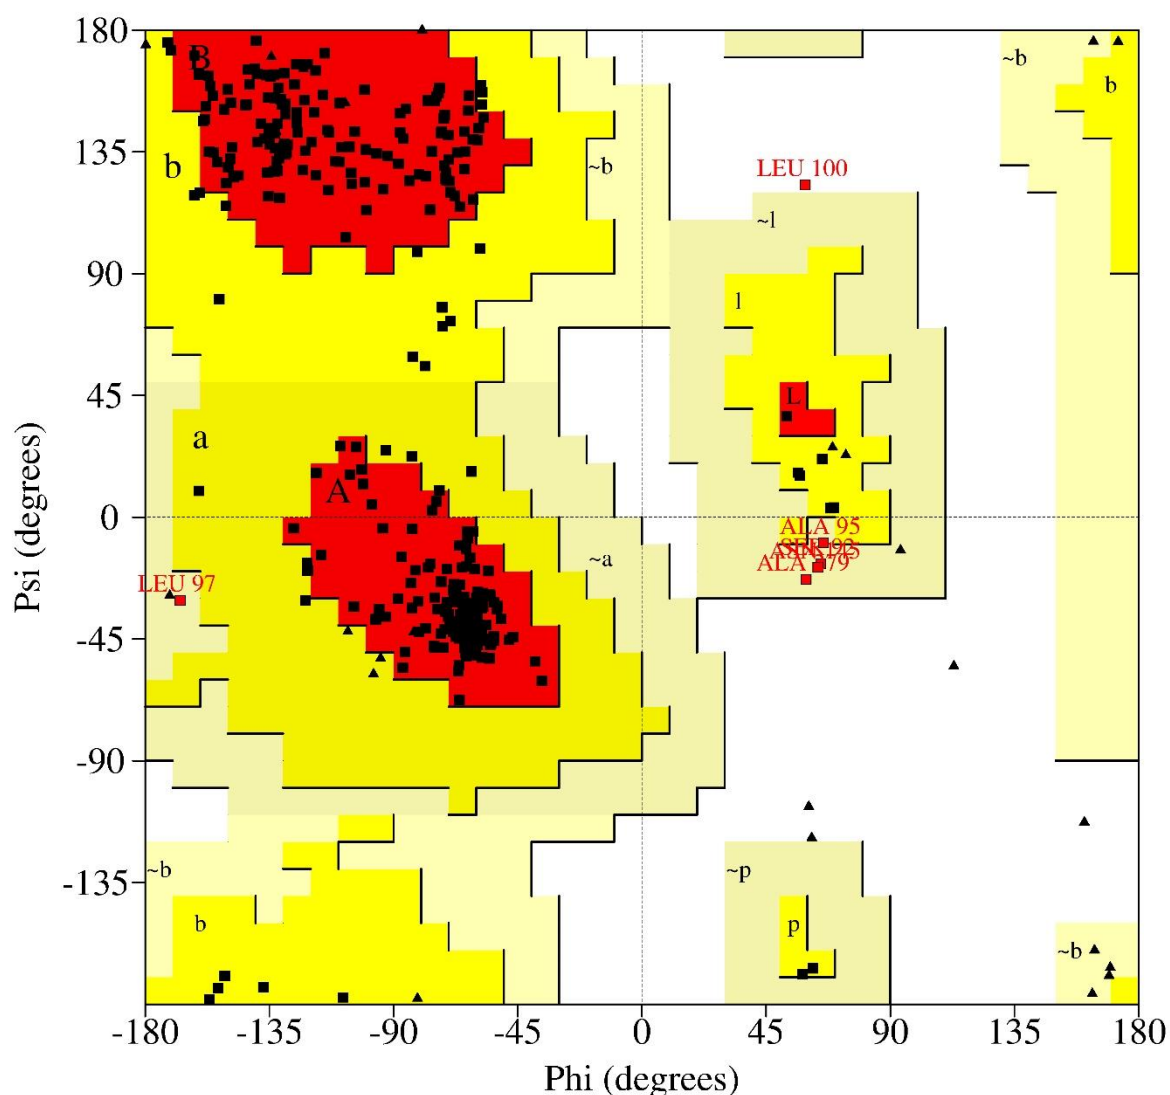

**Figure S2.** PROCHECK's<sup>1</sup> Ramachandran plot that validates the predicted 3D model of gNC1. A good quality model has been obtained since most residues (87.7%) are situated in the most favored regions and 10.5% are in additional allowed regions. A 1.5% of residues are found in generously allowed regions, while only one residue (0.3%) is located in disallowed regions; these latter correspond to residues located in external regions associated to high protein flexibility.

1. Laskowski, R.A.; MacArthur, M.W.; Moss, D.S.; Thornton, J.M. PROCHECK: a program to check the stereochemical quality of protein structures. *J. Appl. Cryst.* 1993, 26, 283-291, doi:10.1107/S0021889892009944

# Molecular structure of gNC1 from *Giardia lamblia*

|      |    |      |     |   |        |        |        |      |      |   |
|------|----|------|-----|---|--------|--------|--------|------|------|---|
| ATOM | 1  | N    | LEU | 1 | 25.530 | 34.611 | 37.113 | 1.00 | 0.00 | N |
| ATOM | 2  | H1   | LEU | 1 | 26.040 | 33.997 | 37.726 | 1.00 | 0.00 | H |
| ATOM | 3  | H2   | LEU | 1 | 25.444 | 35.527 | 37.538 | 1.00 | 0.00 | H |
| ATOM | 4  | H3   | LEU | 1 | 24.587 | 34.254 | 37.025 | 1.00 | 0.00 | H |
| ATOM | 5  | CA   | LEU | 1 | 26.169 | 34.712 | 35.782 | 1.00 | 0.00 | C |
| ATOM | 6  | HA   | LEU | 1 | 27.171 | 35.117 | 35.922 | 1.00 | 0.00 | H |
| ATOM | 7  | CB   | LEU | 1 | 26.317 | 33.345 | 35.083 | 1.00 | 0.00 | C |
| ATOM | 8  | HB2  | LEU | 1 | 25.328 | 32.941 | 34.870 | 1.00 | 0.00 | H |
| ATOM | 9  | HB3  | LEU | 1 | 26.820 | 33.501 | 34.127 | 1.00 | 0.00 | H |
| ATOM | 10 | CG   | LEU | 1 | 27.114 | 32.302 | 35.893 | 1.00 | 0.00 | C |
| ATOM | 11 | HG   | LEU | 1 | 26.618 | 32.134 | 36.849 | 1.00 | 0.00 | H |
| ATOM | 12 | CD1  | LEU | 1 | 27.171 | 30.973 | 35.142 | 1.00 | 0.00 | C |
| ATOM | 13 | HD11 | LEU | 1 | 26.160 | 30.605 | 34.964 | 1.00 | 0.00 | H |
| ATOM | 14 | HD12 | LEU | 1 | 27.711 | 30.235 | 35.735 | 1.00 | 0.00 | H |
| ATOM | 15 | HD13 | LEU | 1 | 27.683 | 31.099 | 34.186 | 1.00 | 0.00 | H |
| ATOM | 16 | CD2  | LEU | 1 | 28.545 | 32.771 | 36.163 | 1.00 | 0.00 | C |
| ATOM | 17 | HD21 | LEU | 1 | 29.050 | 32.976 | 35.218 | 1.00 | 0.00 | H |
| ATOM | 18 | HD22 | LEU | 1 | 28.557 | 33.665 | 36.784 | 1.00 | 0.00 | H |
| ATOM | 19 | HD23 | LEU | 1 | 29.093 | 31.985 | 36.686 | 1.00 | 0.00 | H |
| ATOM | 20 | C    | LEU | 1 | 25.452 | 35.716 | 34.880 | 1.00 | 0.00 | C |
| ATOM | 21 | O    | LEU | 1 | 26.129 | 36.573 | 34.325 | 1.00 | 0.00 | O |
| ATOM | 22 | N    | LYS | 2 | 24.124 | 35.626 | 34.712 | 1.00 | 0.00 | N |
| ATOM | 23 | H    | LYS | 2 | 23.619 | 34.904 | 35.223 | 1.00 | 0.00 | H |
| ATOM | 24 | CA   | LYS | 2 | 23.337 | 36.396 | 33.724 | 1.00 | 0.00 | C |
| ATOM | 25 | HA   | LYS | 2 | 23.770 | 36.225 | 32.737 | 1.00 | 0.00 | H |
| ATOM | 26 | CB   | LYS | 2 | 21.894 | 35.854 | 33.718 | 1.00 | 0.00 | C |
| ATOM | 27 | HB2  | LYS | 2 | 21.521 | 35.779 | 34.742 | 1.00 | 0.00 | H |
| ATOM | 28 | HB3  | LYS | 2 | 21.252 | 36.549 | 33.174 | 1.00 | 0.00 | H |
| ATOM | 29 | CG   | LYS | 2 | 21.805 | 34.485 | 33.023 | 1.00 | 0.00 | C |
| ATOM | 30 | HG2  | LYS | 2 | 22.166 | 34.596 | 31.999 | 1.00 | 0.00 | H |
| ATOM | 31 | HG3  | LYS | 2 | 22.435 | 33.758 | 33.535 | 1.00 | 0.00 | H |
| ATOM | 32 | CD   | LYS | 2 | 20.361 | 33.970 | 32.990 | 1.00 | 0.00 | C |
| ATOM | 33 | HD2  | LYS | 2 | 20.034 | 33.709 | 33.999 | 1.00 | 0.00 | H |
| ATOM | 34 | HD3  | LYS | 2 | 19.721 | 34.762 | 32.602 | 1.00 | 0.00 | H |
| ATOM | 35 | CE   | LYS | 2 | 20.277 | 32.743 | 32.073 | 1.00 | 0.00 | C |
| ATOM | 36 | HE2  | LYS | 2 | 20.880 | 32.950 | 31.185 | 1.00 | 0.00 | H |
| ATOM | 37 | HE3  | LYS | 2 | 20.706 | 31.876 | 32.581 | 1.00 | 0.00 | H |
| ATOM | 38 | NZ   | LYS | 2 | 18.888 | 32.467 | 31.637 | 1.00 | 0.00 | N |
| ATOM | 39 | HZ1  | LYS | 2 | 18.885 | 31.883 | 30.804 | 1.00 | 0.00 | H |
| ATOM | 40 | HZ2  | LYS | 2 | 18.420 | 33.333 | 31.374 | 1.00 | 0.00 | H |
| ATOM | 41 | HZ3  | LYS | 2 | 18.318 | 32.005 | 32.339 | 1.00 | 0.00 | H |
| ATOM | 42 | C    | LYS | 2 | 23.336 | 37.930 | 33.874 | 1.00 | 0.00 | C |
| ATOM | 43 | O    | LYS | 2 | 22.890 | 38.607 | 32.947 | 1.00 | 0.00 | O |
| ATOM | 44 | N    | SER | 3 | 23.827 | 38.506 | 34.976 | 1.00 | 0.00 | N |
| ATOM | 45 | H    | SER | 3 | 24.094 | 37.910 | 35.751 | 1.00 | 0.00 | H |
| ATOM | 46 | CA   | SER | 3 | 24.011 | 39.961 | 35.120 | 1.00 | 0.00 | C |
| ATOM | 47 | HA   | SER | 3 | 23.088 | 40.451 | 34.809 | 1.00 | 0.00 | H |
| ATOM | 48 | CB   | SER | 3 | 24.235 | 40.334 | 36.594 | 1.00 | 0.00 | C |
| ATOM | 49 | HB2  | SER | 3 | 23.353 | 40.066 | 37.178 | 1.00 | 0.00 | H |
| ATOM | 50 | HB3  | SER | 3 | 25.093 | 39.782 | 36.979 | 1.00 | 0.00 | H |

|      |     |      |     |   |        |        |        |      |      |   |
|------|-----|------|-----|---|--------|--------|--------|------|------|---|
| ATOM | 51  | OG   | SER | 3 | 24.478 | 41.731 | 36.714 | 1.00 | 0.00 | O |
| ATOM | 52  | HG   | SER | 3 | 25.134 | 41.946 | 36.031 | 1.00 | 0.00 | H |
| ATOM | 53  | C    | SER | 3 | 25.142 | 40.509 | 34.225 | 1.00 | 0.00 | C |
| ATOM | 54  | O    | SER | 3 | 26.228 | 40.846 | 34.709 | 1.00 | 0.00 | O |
| ATOM | 55  | N    | HID | 4 | 24.861 | 40.675 | 32.929 | 1.00 | 0.00 | N |
| ATOM | 56  | H    | HID | 4 | 23.982 | 40.302 | 32.593 | 1.00 | 0.00 | H |
| ATOM | 57  | CA   | HID | 4 | 25.693 | 41.453 | 32.002 | 1.00 | 0.00 | C |
| ATOM | 58  | HA   | HID | 4 | 26.667 | 40.966 | 31.938 | 1.00 | 0.00 | H |
| ATOM | 59  | CB   | HID | 4 | 25.065 | 41.433 | 30.599 | 1.00 | 0.00 | C |
| ATOM | 60  | HB2  | HID | 4 | 24.027 | 41.765 | 30.662 | 1.00 | 0.00 | H |
| ATOM | 61  | HB3  | HID | 4 | 25.600 | 42.138 | 29.962 | 1.00 | 0.00 | H |
| ATOM | 62  | CG   | HID | 4 | 25.119 | 40.075 | 29.935 | 1.00 | 0.00 | C |
| ATOM | 63  | ND1  | HID | 4 | 26.205 | 39.532 | 29.281 | 1.00 | 0.00 | N |
| ATOM | 64  | HD1  | HID | 4 | 27.109 | 39.981 | 29.117 | 1.00 | 0.00 | H |
| ATOM | 65  | CE1  | HID | 4 | 25.882 | 38.287 | 28.895 | 1.00 | 0.00 | C |
| ATOM | 66  | HE1  | HID | 4 | 26.543 | 37.614 | 28.359 | 1.00 | 0.00 | H |
| ATOM | 67  | NE2  | HID | 4 | 24.626 | 37.988 | 29.269 | 1.00 | 0.00 | N |
| ATOM | 68  | CD2  | HID | 4 | 24.139 | 39.117 | 29.941 | 1.00 | 0.00 | C |
| ATOM | 69  | HD2  | HID | 4 | 23.166 | 39.210 | 30.404 | 1.00 | 0.00 | H |
| ATOM | 70  | C    | HID | 4 | 25.931 | 42.890 | 32.517 | 1.00 | 0.00 | C |
| ATOM | 71  | O    | HID | 4 | 25.148 | 43.427 | 33.302 | 1.00 | 0.00 | O |
| ATOM | 72  | N    | ALA | 5 | 27.056 | 43.492 | 32.123 | 1.00 | 0.00 | N |
| ATOM | 73  | H    | ALA | 5 | 27.641 | 43.028 | 31.447 | 1.00 | 0.00 | H |
| ATOM | 74  | CA   | ALA | 5 | 27.580 | 44.695 | 32.770 | 1.00 | 0.00 | C |
| ATOM | 75  | HA   | ALA | 5 | 27.572 | 44.506 | 33.844 | 1.00 | 0.00 | H |
| ATOM | 76  | CB   | ALA | 5 | 29.037 | 44.880 | 32.351 | 1.00 | 0.00 | C |
| ATOM | 77  | HB1  | ALA | 5 | 29.097 | 45.072 | 31.279 | 1.00 | 0.00 | H |
| ATOM | 78  | HB2  | ALA | 5 | 29.587 | 43.972 | 32.594 | 1.00 | 0.00 | H |
| ATOM | 79  | HB3  | ALA | 5 | 29.478 | 45.717 | 32.894 | 1.00 | 0.00 | H |
| ATOM | 80  | C    | ALA | 5 | 26.750 | 45.973 | 32.538 | 1.00 | 0.00 | C |
| ATOM | 81  | O    | ALA | 5 | 26.171 | 46.192 | 31.475 | 1.00 | 0.00 | O |
| ATOM | 82  | N    | THR | 6 | 26.756 | 46.844 | 33.547 | 1.00 | 0.00 | N |
| ATOM | 83  | H    | THR | 6 | 27.335 | 46.615 | 34.348 | 1.00 | 0.00 | H |
| ATOM | 84  | CA   | THR | 6 | 25.916 | 48.049 | 33.663 | 1.00 | 0.00 | C |
| ATOM | 85  | HA   | THR | 6 | 25.384 | 48.209 | 32.725 | 1.00 | 0.00 | H |
| ATOM | 86  | CB   | THR | 6 | 24.868 | 47.872 | 34.780 | 1.00 | 0.00 | C |
| ATOM | 87  | HB   | THR | 6 | 24.264 | 48.779 | 34.830 | 1.00 | 0.00 | H |
| ATOM | 88  | CG2  | THR | 6 | 23.928 | 46.692 | 34.539 | 1.00 | 0.00 | C |
| ATOM | 89  | HG21 | THR | 6 | 23.148 | 46.689 | 35.299 | 1.00 | 0.00 | H |
| ATOM | 90  | HG22 | THR | 6 | 24.473 | 45.749 | 34.585 | 1.00 | 0.00 | H |
| ATOM | 91  | HG23 | THR | 6 | 23.464 | 46.786 | 33.557 | 1.00 | 0.00 | H |
| ATOM | 92  | OG1  | THR | 6 | 25.481 | 47.676 | 36.039 | 1.00 | 0.00 | O |
| ATOM | 93  | HG1  | THR | 6 | 26.081 | 46.923 | 35.956 | 1.00 | 0.00 | H |
| ATOM | 94  | C    | THR | 6 | 26.757 | 49.295 | 33.946 | 1.00 | 0.00 | C |
| ATOM | 95  | O    | THR | 6 | 27.871 | 49.182 | 34.452 | 1.00 | 0.00 | O |
| ATOM | 96  | N    | VAL | 7 | 26.237 | 50.486 | 33.630 | 1.00 | 0.00 | N |
| ATOM | 97  | H    | VAL | 7 | 25.311 | 50.512 | 33.231 | 1.00 | 0.00 | H |
| ATOM | 98  | CA   | VAL | 7 | 26.774 | 51.768 | 34.124 | 1.00 | 0.00 | C |
| ATOM | 99  | HA   | VAL | 7 | 27.840 | 51.652 | 34.320 | 1.00 | 0.00 | H |
| ATOM | 100 | CB   | VAL | 7 | 26.632 | 52.907 | 33.090 | 1.00 | 0.00 | C |
| ATOM | 101 | HB   | VAL | 7 | 27.231 | 52.640 | 32.229 | 1.00 | 0.00 | H |
| ATOM | 102 | CG1  | VAL | 7 | 25.201 | 53.133 | 32.583 | 1.00 | 0.00 | C |

|      |     |      |     |   |        |        |        |      |      |   |
|------|-----|------|-----|---|--------|--------|--------|------|------|---|
| ATOM | 103 | HG11 | VAL | 7 | 24.805 | 52.224 | 32.133 | 1.00 | 0.00 | H |
| ATOM | 104 | HG12 | VAL | 7 | 24.552 | 53.440 | 33.400 | 1.00 | 0.00 | H |
| ATOM | 105 | HG13 | VAL | 7 | 25.202 | 53.917 | 31.824 | 1.00 | 0.00 | H |
| ATOM | 106 | CG2  | VAL | 7 | 27.184 | 54.237 | 33.614 | 1.00 | 0.00 | C |
| ATOM | 107 | HG21 | VAL | 7 | 28.201 | 54.101 | 33.988 | 1.00 | 0.00 | H |
| ATOM | 108 | HG22 | VAL | 7 | 26.559 | 54.634 | 34.414 | 1.00 | 0.00 | H |
| ATOM | 109 | HG23 | VAL | 7 | 27.218 | 54.967 | 32.805 | 1.00 | 0.00 | H |
| ATOM | 110 | C    | VAL | 7 | 26.095 | 52.124 | 35.444 | 1.00 | 0.00 | C |
| ATOM | 111 | O    | VAL | 7 | 24.871 | 52.001 | 35.572 | 1.00 | 0.00 | O |
| ATOM | 112 | N    | ARG | 8 | 26.868 | 52.597 | 36.425 | 1.00 | 0.00 | N |
| ATOM | 113 | H    | ARG | 8 | 27.875 | 52.661 | 36.272 | 1.00 | 0.00 | H |
| ATOM | 114 | CA   | ARG | 8 | 26.323 | 53.095 | 37.691 | 1.00 | 0.00 | C |
| ATOM | 115 | HA   | ARG | 8 | 25.333 | 53.507 | 37.489 | 1.00 | 0.00 | H |
| ATOM | 116 | CB   | ARG | 8 | 26.184 | 51.932 | 38.694 | 1.00 | 0.00 | C |
| ATOM | 117 | HB2  | ARG | 8 | 25.955 | 51.013 | 38.152 | 1.00 | 0.00 | H |
| ATOM | 118 | HB3  | ARG | 8 | 27.130 | 51.791 | 39.222 | 1.00 | 0.00 | H |
| ATOM | 119 | CG   | ARG | 8 | 25.053 | 52.192 | 39.703 | 1.00 | 0.00 | C |
| ATOM | 120 | HG2  | ARG | 8 | 25.188 | 53.169 | 40.161 | 1.00 | 0.00 | H |
| ATOM | 121 | HG3  | ARG | 8 | 24.098 | 52.195 | 39.174 | 1.00 | 0.00 | H |
| ATOM | 122 | CD   | ARG | 8 | 24.995 | 51.155 | 40.829 | 1.00 | 0.00 | C |
| ATOM | 123 | HD2  | ARG | 8 | 25.908 | 51.222 | 41.425 | 1.00 | 0.00 | H |
| ATOM | 124 | HD3  | ARG | 8 | 24.151 | 51.415 | 41.471 | 1.00 | 0.00 | H |
| ATOM | 125 | NE   | ARG | 8 | 24.825 | 49.774 | 40.332 | 1.00 | 0.00 | N |
| ATOM | 126 | HE   | ARG | 8 | 24.903 | 49.629 | 39.340 | 1.00 | 0.00 | H |
| ATOM | 127 | CZ   | ARG | 8 | 24.571 | 48.718 | 41.085 | 1.00 | 0.00 | C |
| ATOM | 128 | NH1  | ARG | 8 | 24.433 | 48.796 | 42.374 | 1.00 | 0.00 | N |
| ATOM | 129 | HH11 | ARG | 8 | 24.452 | 49.715 | 42.835 | 1.00 | 0.00 | H |
| ATOM | 130 | HH12 | ARG | 8 | 24.187 | 48.002 | 42.947 | 1.00 | 0.00 | H |
| ATOM | 131 | NH2  | ARG | 8 | 24.450 | 47.538 | 40.544 | 1.00 | 0.00 | N |
| ATOM | 132 | HH21 | ARG | 8 | 24.547 | 47.422 | 39.550 | 1.00 | 0.00 | H |
| ATOM | 133 | HH22 | ARG | 8 | 24.225 | 46.756 | 41.132 | 1.00 | 0.00 | H |
| ATOM | 134 | C    | ARG | 8 | 27.180 | 54.217 | 38.261 | 1.00 | 0.00 | C |
| ATOM | 135 | O    | ARG | 8 | 28.404 | 54.162 | 38.213 | 1.00 | 0.00 | O |
| ATOM | 136 | N    | PHE | 9 | 26.527 | 55.197 | 38.876 | 1.00 | 0.00 | N |
| ATOM | 137 | H    | PHE | 9 | 25.521 | 55.203 | 38.850 | 1.00 | 0.00 | H |
| ATOM | 138 | CA   | PHE | 9 | 27.185 | 56.084 | 39.825 | 1.00 | 0.00 | C |
| ATOM | 139 | HA   | PHE | 9 | 28.192 | 56.294 | 39.471 | 1.00 | 0.00 | H |
| ATOM | 140 | CB   | PHE | 9 | 26.428 | 57.420 | 39.891 | 1.00 | 0.00 | C |
| ATOM | 141 | HB2  | PHE | 9 | 25.453 | 57.248 | 40.350 | 1.00 | 0.00 | H |
| ATOM | 142 | HB3  | PHE | 9 | 26.986 | 58.102 | 40.531 | 1.00 | 0.00 | H |
| ATOM | 143 | CG   | PHE | 9 | 26.224 | 58.108 | 38.551 | 1.00 | 0.00 | C |
| ATOM | 144 | CD1  | PHE | 9 | 24.923 | 58.362 | 38.072 | 1.00 | 0.00 | C |
| ATOM | 145 | HD1  | PHE | 9 | 24.059 | 58.068 | 38.651 | 1.00 | 0.00 | H |
| ATOM | 146 | CE1  | PHE | 9 | 24.739 | 59.009 | 36.837 | 1.00 | 0.00 | C |
| ATOM | 147 | HE1  | PHE | 9 | 23.740 | 59.209 | 36.476 | 1.00 | 0.00 | H |
| ATOM | 148 | CZ   | PHE | 9 | 25.853 | 59.401 | 36.073 | 1.00 | 0.00 | C |
| ATOM | 149 | HZ   | PHE | 9 | 25.709 | 59.904 | 35.125 | 1.00 | 0.00 | H |
| ATOM | 150 | CE2  | PHE | 9 | 27.152 | 59.146 | 36.545 | 1.00 | 0.00 | C |
| ATOM | 151 | HE2  | PHE | 9 | 28.010 | 59.444 | 35.957 | 1.00 | 0.00 | H |
| ATOM | 152 | CD2  | PHE | 9 | 27.337 | 58.506 | 37.784 | 1.00 | 0.00 | C |
| ATOM | 153 | HD2  | PHE | 9 | 28.338 | 58.321 | 38.143 | 1.00 | 0.00 | H |
| ATOM | 154 | C    | PHE | 9 | 27.278 | 55.378 | 41.191 | 1.00 | 0.00 | C |

|      |     |      |     |    |        |        |        |      |      |   |
|------|-----|------|-----|----|--------|--------|--------|------|------|---|
| ATOM | 155 | O    | PHE | 9  | 26.255 | 55.011 | 41.775 | 1.00 | 0.00 | O |
| ATOM | 156 | N    | ALA | 10 | 28.491 | 55.199 | 41.709 | 1.00 | 0.00 | N |
| ATOM | 157 | H    | ALA | 10 | 29.289 | 55.476 | 41.147 | 1.00 | 0.00 | H |
| ATOM | 158 | CA   | ALA | 10 | 28.784 | 54.575 | 43.001 | 1.00 | 0.00 | C |
| ATOM | 159 | HA   | ALA | 10 | 27.856 | 54.252 | 43.472 | 1.00 | 0.00 | H |
| ATOM | 160 | CB   | ALA | 10 | 29.627 | 53.321 | 42.733 | 1.00 | 0.00 | C |
| ATOM | 161 | HB1  | ALA | 10 | 30.562 | 53.601 | 42.245 | 1.00 | 0.00 | H |
| ATOM | 162 | HB2  | ALA | 10 | 29.077 | 52.638 | 42.084 | 1.00 | 0.00 | H |
| ATOM | 163 | HB3  | ALA | 10 | 29.849 | 52.812 | 43.672 | 1.00 | 0.00 | H |
| ATOM | 164 | C    | ALA | 10 | 29.485 | 55.543 | 43.975 | 1.00 | 0.00 | C |
| ATOM | 165 | O    | ALA | 10 | 30.043 | 56.560 | 43.568 | 1.00 | 0.00 | O |
| ATOM | 166 | N    | THR | 11 | 29.500 | 55.201 | 45.264 | 1.00 | 0.00 | N |
| ATOM | 167 | H    | THR | 11 | 29.025 | 54.339 | 45.515 | 1.00 | 0.00 | H |
| ATOM | 168 | CA   | THR | 11 | 30.471 | 55.732 | 46.238 | 1.00 | 0.00 | C |
| ATOM | 169 | HA   | THR | 11 | 31.015 | 56.568 | 45.798 | 1.00 | 0.00 | H |
| ATOM | 170 | CB   | THR | 11 | 29.809 | 56.221 | 47.538 | 1.00 | 0.00 | C |
| ATOM | 171 | HB   | THR | 11 | 29.556 | 55.366 | 48.162 | 1.00 | 0.00 | H |
| ATOM | 172 | CG2  | THR | 11 | 30.763 | 57.130 | 48.312 | 1.00 | 0.00 | C |
| ATOM | 173 | HG21 | THR | 11 | 31.642 | 56.571 | 48.631 | 1.00 | 0.00 | H |
| ATOM | 174 | HG22 | THR | 11 | 30.264 | 57.517 | 49.196 | 1.00 | 0.00 | H |
| ATOM | 175 | HG23 | THR | 11 | 31.073 | 57.969 | 47.687 | 1.00 | 0.00 | H |
| ATOM | 176 | OG1  | THR | 11 | 28.633 | 56.963 | 47.304 | 1.00 | 0.00 | O |
| ATOM | 177 | HG1  | THR | 11 | 27.933 | 56.349 | 47.042 | 1.00 | 0.00 | H |
| ATOM | 178 | C    | THR | 11 | 31.467 | 54.617 | 46.559 | 1.00 | 0.00 | C |
| ATOM | 179 | O    | THR | 11 | 31.049 | 53.475 | 46.742 | 1.00 | 0.00 | O |
| ATOM | 180 | N    | ILE | 12 | 32.765 | 54.913 | 46.619 | 1.00 | 0.00 | N |
| ATOM | 181 | H    | ILE | 12 | 33.044 | 55.879 | 46.480 | 1.00 | 0.00 | H |
| ATOM | 182 | CA   | ILE | 12 | 33.839 | 53.909 | 46.625 | 1.00 | 0.00 | C |
| ATOM | 183 | HA   | ILE | 12 | 33.407 | 52.908 | 46.653 | 1.00 | 0.00 | H |
| ATOM | 184 | CB   | ILE | 12 | 34.651 | 54.040 | 45.319 | 1.00 | 0.00 | C |
| ATOM | 185 | HB   | ILE | 12 | 35.039 | 55.060 | 45.273 | 1.00 | 0.00 | H |
| ATOM | 186 | CG2  | ILE | 12 | 35.870 | 53.109 | 45.319 | 1.00 | 0.00 | C |
| ATOM | 187 | HG21 | ILE | 12 | 36.561 | 53.371 | 46.120 | 1.00 | 0.00 | H |
| ATOM | 188 | HG22 | ILE | 12 | 36.398 | 53.240 | 44.382 | 1.00 | 0.00 | H |
| ATOM | 189 | HG23 | ILE | 12 | 35.569 | 52.068 | 45.441 | 1.00 | 0.00 | H |
| ATOM | 190 | CG1  | ILE | 12 | 33.808 | 53.823 | 44.038 | 1.00 | 0.00 | C |
| ATOM | 191 | HG12 | ILE | 12 | 33.038 | 54.593 | 43.978 | 1.00 | 0.00 | H |
| ATOM | 192 | HG13 | ILE | 12 | 34.456 | 53.955 | 43.173 | 1.00 | 0.00 | H |
| ATOM | 193 | CD1  | ILE | 12 | 33.133 | 52.454 | 43.897 | 1.00 | 0.00 | C |
| ATOM | 194 | HD11 | ILE | 12 | 33.877 | 51.660 | 43.923 | 1.00 | 0.00 | H |
| ATOM | 195 | HD12 | ILE | 12 | 32.614 | 52.408 | 42.939 | 1.00 | 0.00 | H |
| ATOM | 196 | HD13 | ILE | 12 | 32.406 | 52.308 | 44.694 | 1.00 | 0.00 | H |
| ATOM | 197 | C    | ILE | 12 | 34.741 | 54.049 | 47.856 | 1.00 | 0.00 | C |
| ATOM | 198 | O    | ILE | 12 | 35.262 | 55.133 | 48.117 | 1.00 | 0.00 | O |
| ATOM | 199 | N    | MET | 13 | 34.965 | 52.937 | 48.564 | 1.00 | 0.00 | N |
| ATOM | 200 | H    | MET | 13 | 34.505 | 52.091 | 48.241 | 1.00 | 0.00 | H |
| ATOM | 201 | CA   | MET | 13 | 35.983 | 52.778 | 49.615 | 1.00 | 0.00 | C |
| ATOM | 202 | HA   | MET | 13 | 36.122 | 53.722 | 50.145 | 1.00 | 0.00 | H |
| ATOM | 203 | CB   | MET | 13 | 35.503 | 51.703 | 50.615 | 1.00 | 0.00 | C |
| ATOM | 204 | HB2  | MET | 13 | 34.677 | 52.101 | 51.200 | 1.00 | 0.00 | H |
| ATOM | 205 | HB3  | MET | 13 | 35.126 | 50.874 | 50.022 | 1.00 | 0.00 | H |
| ATOM | 206 | CG   | MET | 13 | 36.544 | 51.102 | 51.583 | 1.00 | 0.00 | C |

|      |     |         |    |        |        |        |      |      |   |
|------|-----|---------|----|--------|--------|--------|------|------|---|
| ATOM | 207 | HG2 MET | 13 | 37.478 | 50.927 | 51.057 | 1.00 | 0.00 | H |
| ATOM | 208 | HG3 MET | 13 | 36.744 | 51.802 | 52.393 | 1.00 | 0.00 | H |
| ATOM | 209 | SD MET  | 13 | 36.086 | 49.482 | 52.262 | 1.00 | 0.00 | S |
| ATOM | 210 | CE MET  | 13 | 34.865 | 49.947 | 53.513 | 1.00 | 0.00 | C |
| ATOM | 211 | HE1 MET | 13 | 34.409 | 49.045 | 53.919 | 1.00 | 0.00 | H |
| ATOM | 212 | HE2 MET | 13 | 35.358 | 50.485 | 54.321 | 1.00 | 0.00 | H |
| ATOM | 213 | HE3 MET | 13 | 34.090 | 50.572 | 53.072 | 1.00 | 0.00 | H |
| ATOM | 214 | C MET   | 13 | 37.331 | 52.343 | 49.026 | 1.00 | 0.00 | C |
| ATOM | 215 | O MET   | 13 | 37.379 | 51.430 | 48.198 | 1.00 | 0.00 | O |
| ATOM | 216 | N PHE   | 14 | 38.420 | 52.860 | 49.595 | 1.00 | 0.00 | N |
| ATOM | 217 | H PHE   | 14 | 38.317 | 53.684 | 50.183 | 1.00 | 0.00 | H |
| ATOM | 218 | CA PHE  | 14 | 39.684 | 52.127 | 49.719 | 1.00 | 0.00 | C |
| ATOM | 219 | HA PHE  | 14 | 39.493 | 51.063 | 49.571 | 1.00 | 0.00 | H |
| ATOM | 220 | CB PHE  | 14 | 40.658 | 52.593 | 48.624 | 1.00 | 0.00 | C |
| ATOM | 221 | HB2 PHE | 14 | 40.088 | 52.835 | 47.726 | 1.00 | 0.00 | H |
| ATOM | 222 | HB3 PHE | 14 | 41.148 | 53.513 | 48.942 | 1.00 | 0.00 | H |
| ATOM | 223 | CG PHE  | 14 | 41.705 | 51.566 | 48.233 | 1.00 | 0.00 | C |
| ATOM | 224 | CD1 PHE | 14 | 42.952 | 51.519 | 48.884 | 1.00 | 0.00 | C |
| ATOM | 225 | HD1 PHE | 14 | 43.181 | 52.207 | 49.684 | 1.00 | 0.00 | H |
| ATOM | 226 | CE1 PHE | 14 | 43.918 | 50.575 | 48.496 | 1.00 | 0.00 | C |
| ATOM | 227 | HE1 PHE | 14 | 44.872 | 50.551 | 49.010 | 1.00 | 0.00 | H |
| ATOM | 228 | CZ PHE  | 14 | 43.641 | 49.666 | 47.460 | 1.00 | 0.00 | C |
| ATOM | 229 | HZ PHE  | 14 | 44.382 | 48.933 | 47.172 | 1.00 | 0.00 | H |
| ATOM | 230 | CE2 PHE | 14 | 42.397 | 49.710 | 46.804 | 1.00 | 0.00 | C |
| ATOM | 231 | HE2 PHE | 14 | 42.177 | 49.014 | 46.006 | 1.00 | 0.00 | H |
| ATOM | 232 | CD2 PHE | 14 | 41.433 | 50.660 | 47.189 | 1.00 | 0.00 | C |
| ATOM | 233 | HD2 PHE | 14 | 40.479 | 50.693 | 46.683 | 1.00 | 0.00 | H |
| ATOM | 234 | C PHE   | 14 | 40.224 | 52.319 | 51.149 | 1.00 | 0.00 | C |
| ATOM | 235 | O PHE   | 14 | 40.171 | 53.433 | 51.669 | 1.00 | 0.00 | O |
| ATOM | 236 | N CYS   | 15 | 40.693 | 51.265 | 51.821 | 1.00 | 0.00 | N |
| ATOM | 237 | H CYS   | 15 | 40.680 | 50.349 | 51.384 | 1.00 | 0.00 | H |
| ATOM | 238 | CA CYS  | 15 | 41.201 | 51.342 | 53.202 | 1.00 | 0.00 | C |
| ATOM | 239 | HA CYS  | 15 | 41.683 | 52.309 | 53.340 | 1.00 | 0.00 | H |
| ATOM | 240 | CB CYS  | 15 | 40.023 | 51.265 | 54.188 | 1.00 | 0.00 | C |
| ATOM | 241 | HB2 CYS | 15 | 40.391 | 51.458 | 55.197 | 1.00 | 0.00 | H |
| ATOM | 242 | HB3 CYS | 15 | 39.292 | 52.036 | 53.936 | 1.00 | 0.00 | H |
| ATOM | 243 | SG CYS  | 15 | 39.219 | 49.638 | 54.154 | 1.00 | 0.00 | S |
| ATOM | 244 | HG CYS  | 15 | 38.922 | 49.623 | 52.846 | 1.00 | 0.00 | H |
| ATOM | 245 | C CYS   | 15 | 42.278 | 50.283 | 53.484 | 1.00 | 0.00 | C |
| ATOM | 246 | O CYS   | 15 | 42.324 | 49.264 | 52.797 | 1.00 | 0.00 | O |
| ATOM | 247 | N ASP   | 16 | 43.162 | 50.540 | 54.453 | 1.00 | 0.00 | N |
| ATOM | 248 | H ASP   | 16 | 43.052 | 51.397 | 54.988 | 1.00 | 0.00 | H |
| ATOM | 249 | CA ASP  | 16 | 44.401 | 49.775 | 54.686 | 1.00 | 0.00 | C |
| ATOM | 250 | HA ASP  | 16 | 44.176 | 48.713 | 54.577 | 1.00 | 0.00 | H |
| ATOM | 251 | CB ASP  | 16 | 45.384 | 50.162 | 53.537 | 1.00 | 0.00 | C |
| ATOM | 252 | HB2 ASP | 16 | 45.132 | 49.577 | 52.651 | 1.00 | 0.00 | H |
| ATOM | 253 | HB3 ASP | 16 | 45.224 | 51.211 | 53.284 | 1.00 | 0.00 | H |
| ATOM | 254 | CG ASP  | 16 | 46.872 | 50.017 | 53.825 | 1.00 | 0.00 | C |
| ATOM | 255 | OD1 ASP | 16 | 47.655 | 49.351 | 53.082 | 1.00 | 0.00 | O |
| ATOM | 256 | OD2 ASP | 16 | 47.339 | 50.526 | 54.860 | 1.00 | 0.00 | O |
| ATOM | 257 | C ASP   | 16 | 44.923 | 49.963 | 56.147 | 1.00 | 0.00 | C |
| ATOM | 258 | O ASP   | 16 | 44.650 | 50.975 | 56.799 | 1.00 | 0.00 | O |



|      |     |      |     |    |        |        |        |      |      |   |
|------|-----|------|-----|----|--------|--------|--------|------|------|---|
| ATOM | 259 | N    | ILE | 17 | 45.659 | 48.977 | 56.692 | 1.00 | 0.00 | N |
| ATOM | 260 | H    | ILE | 17 | 45.887 | 48.183 | 56.105 | 1.00 | 0.00 | H |
| ATOM | 261 | CA   | ILE | 17 | 46.224 | 48.987 | 58.064 | 1.00 | 0.00 | C |
| ATOM | 262 | HA   | ILE | 17 | 45.499 | 49.452 | 58.734 | 1.00 | 0.00 | H |
| ATOM | 263 | CB   | ILE | 17 | 46.475 | 47.536 | 58.560 | 1.00 | 0.00 | C |
| ATOM | 264 | HB   | ILE | 17 | 47.222 | 47.084 | 57.908 | 1.00 | 0.00 | H |
| ATOM | 265 | CG2  | ILE | 17 | 47.038 | 47.542 | 59.997 | 1.00 | 0.00 | C |
| ATOM | 266 | HG21 | ILE | 17 | 47.966 | 48.111 | 60.054 | 1.00 | 0.00 | H |
| ATOM | 267 | HG22 | ILE | 17 | 47.258 | 46.531 | 60.330 | 1.00 | 0.00 | H |
| ATOM | 268 | HG23 | ILE | 17 | 46.306 | 47.980 | 60.674 | 1.00 | 0.00 | H |
| ATOM | 269 | CG1  | ILE | 17 | 45.203 | 46.658 | 58.485 | 1.00 | 0.00 | C |
| ATOM | 270 | HG12 | ILE | 17 | 44.442 | 47.060 | 59.154 | 1.00 | 0.00 | H |
| ATOM | 271 | HG13 | ILE | 17 | 44.808 | 46.685 | 57.469 | 1.00 | 0.00 | H |
| ATOM | 272 | CD1  | ILE | 17 | 45.446 | 45.179 | 58.825 | 1.00 | 0.00 | C |
| ATOM | 273 | HD11 | ILE | 17 | 46.308 | 44.805 | 58.274 | 1.00 | 0.00 | H |
| ATOM | 274 | HD12 | ILE | 17 | 44.573 | 44.594 | 58.540 | 1.00 | 0.00 | H |
| ATOM | 275 | HD13 | ILE | 17 | 45.610 | 45.053 | 59.895 | 1.00 | 0.00 | H |
| ATOM | 276 | C    | ILE | 17 | 47.535 | 49.798 | 58.115 | 1.00 | 0.00 | C |
| ATOM | 277 | O    | ILE | 17 | 48.496 | 49.449 | 57.423 | 1.00 | 0.00 | O |
| ATOM | 278 | N    | LYS | 18 | 47.664 | 50.848 | 58.937 | 1.00 | 0.00 | N |
| ATOM | 279 | H    | LYS | 18 | 46.916 | 51.023 | 59.599 | 1.00 | 0.00 | H |
| ATOM | 280 | CA   | LYS | 18 | 48.862 | 51.727 | 58.918 | 1.00 | 0.00 | C |
| ATOM | 281 | HA   | LYS | 18 | 48.962 | 52.119 | 57.905 | 1.00 | 0.00 | H |
| ATOM | 282 | CB   | LYS | 18 | 48.679 | 52.919 | 59.876 | 1.00 | 0.00 | C |
| ATOM | 283 | HB2  | LYS | 18 | 47.686 | 53.352 | 59.743 | 1.00 | 0.00 | H |
| ATOM | 284 | HB3  | LYS | 18 | 48.755 | 52.550 | 60.895 | 1.00 | 0.00 | H |
| ATOM | 285 | CG   | LYS | 18 | 49.739 | 54.019 | 59.646 | 1.00 | 0.00 | C |
| ATOM | 286 | HG2  | LYS | 18 | 50.722 | 53.579 | 59.476 | 1.00 | 0.00 | H |
| ATOM | 287 | HG3  | LYS | 18 | 49.463 | 54.579 | 58.752 | 1.00 | 0.00 | H |
| ATOM | 288 | CD   | LYS | 18 | 49.855 | 54.990 | 60.829 | 1.00 | 0.00 | C |
| ATOM | 289 | HD2  | LYS | 18 | 50.372 | 55.893 | 60.498 | 1.00 | 0.00 | H |
| ATOM | 290 | HD3  | LYS | 18 | 48.854 | 55.266 | 61.163 | 1.00 | 0.00 | H |
| ATOM | 291 | CE   | LYS | 18 | 50.655 | 54.381 | 61.991 | 1.00 | 0.00 | C |
| ATOM | 292 | HE2  | LYS | 18 | 50.315 | 53.355 | 62.162 | 1.00 | 0.00 | H |
| ATOM | 293 | HE3  | LYS | 18 | 51.712 | 54.351 | 61.714 | 1.00 | 0.00 | H |
| ATOM | 294 | NZ   | LYS | 18 | 50.473 | 55.165 | 63.235 | 1.00 | 0.00 | N |
| ATOM | 295 | HZ1  | LYS | 18 | 51.070 | 54.855 | 63.985 | 1.00 | 0.00 | H |
| ATOM | 296 | HZ2  | LYS | 18 | 49.498 | 55.080 | 63.533 | 1.00 | 0.00 | H |
| ATOM | 297 | HZ3  | LYS | 18 | 50.591 | 56.167 | 63.089 | 1.00 | 0.00 | H |
| ATOM | 298 | C    | LYS | 18 | 50.160 | 50.971 | 59.271 | 1.00 | 0.00 | C |
| ATOM | 299 | O    | LYS | 18 | 50.264 | 50.408 | 60.355 | 1.00 | 0.00 | O |
| ATOM | 300 | N    | GLY | 19 | 51.173 | 51.035 | 58.397 | 1.00 | 0.00 | N |
| ATOM | 301 | H    | GLY | 19 | 51.017 | 51.468 | 57.500 | 1.00 | 0.00 | H |
| ATOM | 302 | CA   | GLY | 19 | 52.535 | 50.551 | 58.681 | 1.00 | 0.00 | C |
| ATOM | 303 | HA2  | GLY | 19 | 53.182 | 50.846 | 57.854 | 1.00 | 0.00 | H |
| ATOM | 304 | HA3  | GLY | 19 | 52.903 | 51.022 | 59.594 | 1.00 | 0.00 | H |
| ATOM | 305 | C    | GLY | 19 | 52.674 | 49.031 | 58.843 | 1.00 | 0.00 | C |
| ATOM | 306 | O    | GLY | 19 | 53.560 | 48.565 | 59.560 | 1.00 | 0.00 | O |
| ATOM | 307 | N    | PHE | 20 | 51.806 | 48.255 | 58.190 | 1.00 | 0.00 | N |
| ATOM | 308 | H    | PHE | 20 | 51.245 | 48.703 | 57.477 | 1.00 | 0.00 | H |
| ATOM | 309 | CA   | PHE | 20 | 51.728 | 46.798 | 58.310 | 1.00 | 0.00 | C |
| ATOM | 310 | HA   | PHE | 20 | 51.601 | 46.558 | 59.365 | 1.00 | 0.00 | H |

|      |     |      |     |    |        |        |        |      |      |   |
|------|-----|------|-----|----|--------|--------|--------|------|------|---|
| ATOM | 311 | CB   | PHE | 20 | 50.474 | 46.306 | 57.577 | 1.00 | 0.00 | C |
| ATOM | 312 | HB2  | PHE | 20 | 49.616 | 46.866 | 57.948 | 1.00 | 0.00 | H |
| ATOM | 313 | HB3  | PHE | 20 | 50.567 | 46.533 | 56.519 | 1.00 | 0.00 | H |
| ATOM | 314 | CG   | PHE | 20 | 50.184 | 44.825 | 57.741 | 1.00 | 0.00 | C |
| ATOM | 315 | CD1  | PHE | 20 | 49.296 | 44.388 | 58.742 | 1.00 | 0.00 | C |
| ATOM | 316 | HD1  | PHE | 20 | 48.819 | 45.106 | 59.389 | 1.00 | 0.00 | H |
| ATOM | 317 | CE1  | PHE | 20 | 49.020 | 43.019 | 58.894 | 1.00 | 0.00 | C |
| ATOM | 318 | HE1  | PHE | 20 | 48.329 | 42.686 | 59.654 | 1.00 | 0.00 | H |
| ATOM | 319 | CZ   | PHE | 20 | 49.633 | 42.083 | 58.044 | 1.00 | 0.00 | C |
| ATOM | 320 | HZ   | PHE | 20 | 49.411 | 41.033 | 58.148 | 1.00 | 0.00 | H |
| ATOM | 321 | CE2  | PHE | 20 | 50.521 | 42.511 | 57.045 | 1.00 | 0.00 | C |
| ATOM | 322 | HE2  | PHE | 20 | 50.987 | 41.793 | 56.386 | 1.00 | 0.00 | H |
| ATOM | 323 | CD2  | PHE | 20 | 50.795 | 43.880 | 56.895 | 1.00 | 0.00 | C |
| ATOM | 324 | HD2  | PHE | 20 | 51.481 | 44.204 | 56.126 | 1.00 | 0.00 | H |
| ATOM | 325 | C    | PHE | 20 | 53.016 | 46.086 | 57.852 | 1.00 | 0.00 | C |
| ATOM | 326 | O    | PHE | 20 | 53.345 | 45.032 | 58.404 | 1.00 | 0.00 | O |
| ATOM | 327 | N    | THR | 21 | 53.821 | 46.715 | 56.979 | 1.00 | 0.00 | N |
| ATOM | 328 | H    | THR | 21 | 53.469 | 47.541 | 56.513 | 1.00 | 0.00 | H |
| ATOM | 329 | CA   | THR | 21 | 55.207 | 46.301 | 56.684 | 1.00 | 0.00 | C |
| ATOM | 330 | HA   | THR | 21 | 55.185 | 45.410 | 56.056 | 1.00 | 0.00 | H |
| ATOM | 331 | CB   | THR | 21 | 55.980 | 47.402 | 55.925 | 1.00 | 0.00 | C |
| ATOM | 332 | HB   | THR | 21 | 55.891 | 48.343 | 56.469 | 1.00 | 0.00 | H |
| ATOM | 333 | CG2  | THR | 21 | 57.466 | 47.092 | 55.753 | 1.00 | 0.00 | C |
| ATOM | 334 | HG21 | THR | 21 | 57.983 | 47.239 | 56.700 | 1.00 | 0.00 | H |
| ATOM | 335 | HG22 | THR | 21 | 57.899 | 47.765 | 55.013 | 1.00 | 0.00 | H |
| ATOM | 336 | HG23 | THR | 21 | 57.591 | 46.060 | 55.432 | 1.00 | 0.00 | H |
| ATOM | 337 | OG1  | THR | 21 | 55.467 | 47.592 | 54.633 | 1.00 | 0.00 | O |
| ATOM | 338 | HG1  | THR | 21 | 54.819 | 48.334 | 54.710 | 1.00 | 0.00 | H |
| ATOM | 339 | C    | THR | 21 | 55.963 | 45.957 | 57.971 | 1.00 | 0.00 | C |
| ATOM | 340 | O    | THR | 21 | 56.409 | 44.821 | 58.135 | 1.00 | 0.00 | O |
| ATOM | 341 | N    | SER | 22 | 56.011 | 46.889 | 58.932 | 1.00 | 0.00 | N |
| ATOM | 342 | H    | SER | 22 | 55.508 | 47.756 | 58.792 | 1.00 | 0.00 | H |
| ATOM | 343 | CA   | SER | 22 | 56.762 | 46.743 | 60.188 | 1.00 | 0.00 | C |
| ATOM | 344 | HA   | SER | 22 | 57.771 | 46.418 | 59.945 | 1.00 | 0.00 | H |
| ATOM | 345 | CB   | SER | 22 | 56.874 | 48.093 | 60.907 | 1.00 | 0.00 | C |
| ATOM | 346 | HB2  | SER | 22 | 55.879 | 48.436 | 61.198 | 1.00 | 0.00 | H |
| ATOM | 347 | HB3  | SER | 22 | 57.482 | 47.972 | 61.805 | 1.00 | 0.00 | H |
| ATOM | 348 | OG   | SER | 22 | 57.480 | 49.060 | 60.062 | 1.00 | 0.00 | O |
| ATOM | 349 | HG   | SER | 22 | 58.223 | 48.625 | 59.620 | 1.00 | 0.00 | H |
| ATOM | 350 | C    | SER | 22 | 56.195 | 45.692 | 61.150 | 1.00 | 0.00 | C |
| ATOM | 351 | O    | SER | 22 | 56.880 | 45.305 | 62.094 | 1.00 | 0.00 | O |
| ATOM | 352 | N    | LEU | 23 | 54.970 | 45.212 | 60.919 | 1.00 | 0.00 | N |
| ATOM | 353 | H    | LEU | 23 | 54.471 | 45.557 | 60.108 | 1.00 | 0.00 | H |
| ATOM | 354 | CA   | LEU | 23 | 54.391 | 44.084 | 61.650 | 1.00 | 0.00 | C |
| ATOM | 355 | HA   | LEU | 23 | 54.771 | 44.091 | 62.673 | 1.00 | 0.00 | H |
| ATOM | 356 | CB   | LEU | 23 | 52.857 | 44.243 | 61.711 | 1.00 | 0.00 | C |
| ATOM | 357 | HB2  | LEU | 23 | 52.446 | 44.046 | 60.721 | 1.00 | 0.00 | H |
| ATOM | 358 | HB3  | LEU | 23 | 52.461 | 43.491 | 62.395 | 1.00 | 0.00 | H |
| ATOM | 359 | CG   | LEU | 23 | 52.363 | 45.637 | 62.158 | 1.00 | 0.00 | C |
| ATOM | 360 | HG   | LEU | 23 | 52.674 | 46.383 | 61.427 | 1.00 | 0.00 | H |
| ATOM | 361 | CD1  | LEU | 23 | 50.837 | 45.655 | 62.221 | 1.00 | 0.00 | C |
| ATOM | 362 | HD11 | LEU | 23 | 50.425 | 45.316 | 61.272 | 1.00 | 0.00 | H |

|      |     |          |    |        |        |        |      |      |   |
|------|-----|----------|----|--------|--------|--------|------|------|---|
| ATOM | 363 | HD12 LEU | 23 | 50.492 | 46.672 | 62.410 | 1.00 | 0.00 | H |
| ATOM | 364 | HD13 LEU | 23 | 50.493 | 45.004 | 63.022 | 1.00 | 0.00 | H |
| ATOM | 365 | CD2 LEU  | 23 | 52.892 | 46.054 | 63.533 | 1.00 | 0.00 | C |
| ATOM | 366 | HD21 LEU | 23 | 52.592 | 45.329 | 64.287 | 1.00 | 0.00 | H |
| ATOM | 367 | HD22 LEU | 23 | 53.978 | 46.130 | 63.510 | 1.00 | 0.00 | H |
| ATOM | 368 | HD23 LEU | 23 | 52.490 | 47.032 | 63.797 | 1.00 | 0.00 | H |
| ATOM | 369 | C LEU    | 23 | 54.845 | 42.756 | 61.016 | 1.00 | 0.00 | C |
| ATOM | 370 | O LEU    | 23 | 55.294 | 41.853 | 61.727 | 1.00 | 0.00 | O |
| ATOM | 371 | N SER    | 24 | 54.822 | 42.666 | 59.679 | 1.00 | 0.00 | N |
| ATOM | 372 | H SER    | 24 | 54.445 | 43.452 | 59.158 | 1.00 | 0.00 | H |
| ATOM | 373 | CA SER   | 24 | 55.355 | 41.516 | 58.925 | 1.00 | 0.00 | C |
| ATOM | 374 | HA SER   | 24 | 54.892 | 40.615 | 59.323 | 1.00 | 0.00 | H |
| ATOM | 375 | CB SER   | 24 | 54.954 | 41.631 | 57.445 | 1.00 | 0.00 | C |
| ATOM | 376 | HB2 SER  | 24 | 55.055 | 40.647 | 56.984 | 1.00 | 0.00 | H |
| ATOM | 377 | HB3 SER  | 24 | 53.906 | 41.928 | 57.380 | 1.00 | 0.00 | H |
| ATOM | 378 | OG SER   | 24 | 55.743 | 42.545 | 56.704 | 1.00 | 0.00 | O |
| ATOM | 379 | HG SER   | 24 | 55.908 | 43.350 | 57.228 | 1.00 | 0.00 | H |
| ATOM | 380 | C SER    | 24 | 56.875 | 41.332 | 59.089 | 1.00 | 0.00 | C |
| ATOM | 381 | O SER    | 24 | 57.370 | 40.205 | 59.125 | 1.00 | 0.00 | O |
| ATOM | 382 | N ASP    | 25 | 57.605 | 42.431 | 59.296 | 1.00 | 0.00 | N |
| ATOM | 383 | H ASP    | 25 | 57.152 | 43.326 | 59.151 | 1.00 | 0.00 | H |
| ATOM | 384 | CA ASP   | 25 | 59.045 | 42.451 | 59.584 | 1.00 | 0.00 | C |
| ATOM | 385 | HA ASP   | 25 | 59.576 | 41.931 | 58.785 | 1.00 | 0.00 | H |
| ATOM | 386 | CB ASP   | 25 | 59.536 | 43.912 | 59.635 | 1.00 | 0.00 | C |
| ATOM | 387 | HB2 ASP  | 25 | 58.943 | 44.452 | 60.374 | 1.00 | 0.00 | H |
| ATOM | 388 | HB3 ASP  | 25 | 60.571 | 43.922 | 59.980 | 1.00 | 0.00 | H |
| ATOM | 389 | CG ASP   | 25 | 59.509 | 44.686 | 58.318 | 1.00 | 0.00 | C |
| ATOM | 390 | OD1 ASP  | 25 | 59.528 | 44.074 | 57.227 | 1.00 | 0.00 | O |
| ATOM | 391 | OD2 ASP  | 25 | 59.574 | 45.935 | 58.383 | 1.00 | 0.00 | O |
| ATOM | 392 | C ASP    | 25 | 59.440 | 41.784 | 60.917 | 1.00 | 0.00 | C |
| ATOM | 393 | O ASP    | 25 | 60.634 | 41.583 | 61.150 | 1.00 | 0.00 | O |
| ATOM | 394 | N LYS    | 26 | 58.489 | 41.520 | 61.831 | 1.00 | 0.00 | N |
| ATOM | 395 | H LYS    | 26 | 57.529 | 41.716 | 61.574 | 1.00 | 0.00 | H |
| ATOM | 396 | CA LYS   | 26 | 58.807 | 41.185 | 63.235 | 1.00 | 0.00 | C |
| ATOM | 397 | HA LYS   | 26 | 59.844 | 40.851 | 63.284 | 1.00 | 0.00 | H |
| ATOM | 398 | CB LYS   | 26 | 58.667 | 42.448 | 64.116 | 1.00 | 0.00 | C |
| ATOM | 399 | HB2 LYS  | 26 | 57.618 | 42.750 | 64.117 | 1.00 | 0.00 | H |
| ATOM | 400 | HB3 LYS  | 26 | 58.937 | 42.195 | 65.143 | 1.00 | 0.00 | H |
| ATOM | 401 | CG LYS   | 26 | 59.506 | 43.669 | 63.683 | 1.00 | 0.00 | C |
| ATOM | 402 | HG2 LYS  | 26 | 59.245 | 43.931 | 62.659 | 1.00 | 0.00 | H |
| ATOM | 403 | HG3 LYS  | 26 | 59.222 | 44.518 | 64.307 | 1.00 | 0.00 | H |
| ATOM | 404 | CD LYS   | 26 | 61.030 | 43.485 | 63.792 | 1.00 | 0.00 | C |
| ATOM | 405 | HD2 LYS  | 26 | 61.327 | 43.572 | 64.838 | 1.00 | 0.00 | H |
| ATOM | 406 | HD3 LYS  | 26 | 61.324 | 42.501 | 63.428 | 1.00 | 0.00 | H |
| ATOM | 407 | CE LYS   | 26 | 61.734 | 44.556 | 62.947 | 1.00 | 0.00 | C |
| ATOM | 408 | HE2 LYS  | 26 | 61.450 | 44.405 | 61.901 | 1.00 | 0.00 | H |
| ATOM | 409 | HE3 LYS  | 26 | 61.378 | 45.542 | 63.256 | 1.00 | 0.00 | H |
| ATOM | 410 | NZ LYS   | 26 | 63.209 | 44.491 | 63.077 | 1.00 | 0.00 | N |
| ATOM | 411 | HZ1 LYS  | 26 | 63.670 | 45.183 | 62.489 | 1.00 | 0.00 | H |
| ATOM | 412 | HZ2 LYS  | 26 | 63.571 | 43.572 | 62.839 | 1.00 | 0.00 | H |
| ATOM | 413 | HZ3 LYS  | 26 | 63.497 | 44.657 | 64.038 | 1.00 | 0.00 | H |
| ATOM | 414 | C LYS    | 26 | 58.006 | 40.029 | 63.841 | 1.00 | 0.00 | C |

|      |     |      |     |    |        |        |        |      |      |   |
|------|-----|------|-----|----|--------|--------|--------|------|------|---|
| ATOM | 415 | O    | LYS | 26 | 58.559 | 39.341 | 64.706 | 1.00 | 0.00 | O |
| ATOM | 416 | N    | MET | 27 | 56.743 | 39.823 | 63.455 | 1.00 | 0.00 | N |
| ATOM | 417 | H    | MET | 27 | 56.368 | 40.394 | 62.707 | 1.00 | 0.00 | H |
| ATOM | 418 | CA   | MET | 27 | 55.794 | 39.010 | 64.238 | 1.00 | 0.00 | C |
| ATOM | 419 | HA   | MET | 27 | 56.241 | 38.856 | 65.215 | 1.00 | 0.00 | H |
| ATOM | 420 | CB   | MET | 27 | 54.501 | 39.802 | 64.476 | 1.00 | 0.00 | C |
| ATOM | 421 | HB2  | MET | 27 | 53.985 | 39.947 | 63.526 | 1.00 | 0.00 | H |
| ATOM | 422 | HB3  | MET | 27 | 53.846 | 39.227 | 65.132 | 1.00 | 0.00 | H |
| ATOM | 423 | CG   | MET | 27 | 54.762 | 41.176 | 65.110 | 1.00 | 0.00 | C |
| ATOM | 424 | HG2  | MET | 27 | 55.260 | 41.809 | 64.376 | 1.00 | 0.00 | H |
| ATOM | 425 | HG3  | MET | 27 | 53.802 | 41.634 | 65.321 | 1.00 | 0.00 | H |
| ATOM | 426 | SD   | MET | 27 | 55.757 | 41.205 | 66.634 | 1.00 | 0.00 | S |
| ATOM | 427 | CE   | MET | 27 | 54.681 | 40.312 | 67.791 | 1.00 | 0.00 | C |
| ATOM | 428 | HE1  | MET | 27 | 53.732 | 40.836 | 67.901 | 1.00 | 0.00 | H |
| ATOM | 429 | HE2  | MET | 27 | 54.500 | 39.299 | 67.433 | 1.00 | 0.00 | H |
| ATOM | 430 | HE3  | MET | 27 | 55.170 | 40.260 | 68.764 | 1.00 | 0.00 | H |
| ATOM | 431 | C    | MET | 27 | 55.489 | 37.618 | 63.642 | 1.00 | 0.00 | C |
| ATOM | 432 | O    | MET | 27 | 55.473 | 37.473 | 62.420 | 1.00 | 0.00 | O |
| ATOM | 433 | N    | PRO | 28 | 55.199 | 36.589 | 64.474 | 1.00 | 0.00 | N |
| ATOM | 434 | CD   | PRO | 28 | 55.270 | 36.581 | 65.932 | 1.00 | 0.00 | C |
| ATOM | 435 | HD2  | PRO | 28 | 54.331 | 36.953 | 66.344 | 1.00 | 0.00 | H |
| ATOM | 436 | HD3  | PRO | 28 | 56.108 | 37.163 | 66.314 | 1.00 | 0.00 | H |
| ATOM | 437 | CG   | PRO | 28 | 55.465 | 35.119 | 66.325 | 1.00 | 0.00 | C |
| ATOM | 438 | HG2  | PRO | 28 | 55.084 | 34.913 | 67.325 | 1.00 | 0.00 | H |
| ATOM | 439 | HG3  | PRO | 28 | 56.521 | 34.856 | 66.253 | 1.00 | 0.00 | H |
| ATOM | 440 | CB   | PRO | 28 | 54.675 | 34.380 | 65.250 | 1.00 | 0.00 | C |
| ATOM | 441 | HB2  | PRO | 28 | 53.621 | 34.368 | 65.529 | 1.00 | 0.00 | H |
| ATOM | 442 | HB3  | PRO | 28 | 55.042 | 33.363 | 65.108 | 1.00 | 0.00 | H |
| ATOM | 443 | CA   | PRO | 28 | 54.879 | 35.240 | 63.997 | 1.00 | 0.00 | C |
| ATOM | 444 | HA   | PRO | 28 | 55.742 | 34.863 | 63.446 | 1.00 | 0.00 | H |
| ATOM | 445 | C    | PRO | 28 | 53.641 | 35.184 | 63.092 | 1.00 | 0.00 | C |
| ATOM | 446 | O    | PRO | 28 | 52.660 | 35.897 | 63.313 | 1.00 | 0.00 | O |
| ATOM | 447 | N    | LEU | 29 | 53.652 | 34.279 | 62.108 | 1.00 | 0.00 | N |
| ATOM | 448 | H    | LEU | 29 | 54.481 | 33.716 | 61.998 | 1.00 | 0.00 | H |
| ATOM | 449 | CA   | LEU | 29 | 52.633 | 34.208 | 61.053 | 1.00 | 0.00 | C |
| ATOM | 450 | HA   | LEU | 29 | 52.654 | 35.170 | 60.548 | 1.00 | 0.00 | H |
| ATOM | 451 | CB   | LEU | 29 | 53.029 | 33.132 | 60.019 | 1.00 | 0.00 | C |
| ATOM | 452 | HB2  | LEU | 29 | 52.434 | 33.320 | 59.126 | 1.00 | 0.00 | H |
| ATOM | 453 | HB3  | LEU | 29 | 54.071 | 33.294 | 59.750 | 1.00 | 0.00 | H |
| ATOM | 454 | CG   | LEU | 29 | 52.832 | 31.643 | 60.379 | 1.00 | 0.00 | C |
| ATOM | 455 | HG   | LEU | 29 | 51.780 | 31.457 | 60.593 | 1.00 | 0.00 | H |
| ATOM | 456 | CD1  | LEU | 29 | 53.226 | 30.788 | 59.173 | 1.00 | 0.00 | C |
| ATOM | 457 | HD11 | LEU | 29 | 52.661 | 31.100 | 58.296 | 1.00 | 0.00 | H |
| ATOM | 458 | HD12 | LEU | 29 | 52.994 | 29.741 | 59.377 | 1.00 | 0.00 | H |
| ATOM | 459 | HD13 | LEU | 29 | 54.292 | 30.883 | 58.974 | 1.00 | 0.00 | H |
| ATOM | 460 | CD2  | LEU | 29 | 53.679 | 31.167 | 61.564 | 1.00 | 0.00 | C |
| ATOM | 461 | HD21 | LEU | 29 | 54.733 | 31.384 | 61.385 | 1.00 | 0.00 | H |
| ATOM | 462 | HD22 | LEU | 29 | 53.356 | 31.646 | 62.486 | 1.00 | 0.00 | H |
| ATOM | 463 | HD23 | LEU | 29 | 53.553 | 30.092 | 61.686 | 1.00 | 0.00 | H |
| ATOM | 464 | C    | LEU | 29 | 51.192 | 34.058 | 61.566 | 1.00 | 0.00 | C |
| ATOM | 465 | O    | LEU | 29 | 50.302 | 34.790 | 61.136 | 1.00 | 0.00 | O |
| ATOM | 466 | N    | THR | 30 | 50.964 | 33.183 | 62.546 | 1.00 | 0.00 | N |

|      |     |      |     |    |        |        |        |      |      |   |
|------|-----|------|-----|----|--------|--------|--------|------|------|---|
| ATOM | 467 | H    | THR | 30 | 51.714 | 32.580 | 62.850 | 1.00 | 0.00 | H |
| ATOM | 468 | CA   | THR | 30 | 49.641 | 32.973 | 63.155 | 1.00 | 0.00 | C |
| ATOM | 469 | HA   | THR | 30 | 48.918 | 32.767 | 62.366 | 1.00 | 0.00 | H |
| ATOM | 470 | CB   | THR | 30 | 49.693 | 31.754 | 64.094 | 1.00 | 0.00 | C |
| ATOM | 471 | HB   | THR | 30 | 50.327 | 31.988 | 64.947 | 1.00 | 0.00 | H |
| ATOM | 472 | CG2  | THR | 30 | 48.324 | 31.310 | 64.608 | 1.00 | 0.00 | C |
| ATOM | 473 | HG21 | THR | 30 | 47.654 | 31.124 | 63.768 | 1.00 | 0.00 | H |
| ATOM | 474 | HG22 | THR | 30 | 47.896 | 32.080 | 65.249 | 1.00 | 0.00 | H |
| ATOM | 475 | HG23 | THR | 30 | 48.429 | 30.396 | 65.194 | 1.00 | 0.00 | H |
| ATOM | 476 | OG1  | THR | 30 | 50.248 | 30.652 | 63.414 | 1.00 | 0.00 | O |
| ATOM | 477 | HG1  | THR | 30 | 50.285 | 29.926 | 64.045 | 1.00 | 0.00 | H |
| ATOM | 478 | C    | THR | 30 | 49.157 | 34.212 | 63.921 | 1.00 | 0.00 | C |
| ATOM | 479 | O    | THR | 30 | 47.954 | 34.432 | 64.047 | 1.00 | 0.00 | O |
| ATOM | 480 | N    | HID | 31 | 50.078 | 35.041 | 64.426 | 1.00 | 0.00 | N |
| ATOM | 481 | H    | HID | 31 | 51.052 | 34.870 | 64.213 | 1.00 | 0.00 | H |
| ATOM | 482 | CA   | HID | 31 | 49.754 | 36.272 | 65.153 | 1.00 | 0.00 | C |
| ATOM | 483 | HA   | HID | 31 | 48.856 | 36.106 | 65.750 | 1.00 | 0.00 | H |
| ATOM | 484 | CB   | HID | 31 | 50.897 | 36.666 | 66.120 | 1.00 | 0.00 | C |
| ATOM | 485 | HB2  | HID | 31 | 51.760 | 36.975 | 65.529 | 1.00 | 0.00 | H |
| ATOM | 486 | HB3  | HID | 31 | 50.568 | 37.544 | 66.679 | 1.00 | 0.00 | H |
| ATOM | 487 | CG   | HID | 31 | 51.387 | 35.634 | 67.130 | 1.00 | 0.00 | C |
| ATOM | 488 | ND1  | HID | 31 | 52.215 | 35.895 | 68.206 | 1.00 | 0.00 | N |
| ATOM | 489 | HD1  | HID | 31 | 52.495 | 36.803 | 68.581 | 1.00 | 0.00 | H |
| ATOM | 490 | CE1  | HID | 31 | 52.523 | 34.732 | 68.803 | 1.00 | 0.00 | C |
| ATOM | 491 | HE1  | HID | 31 | 53.137 | 34.641 | 69.691 | 1.00 | 0.00 | H |
| ATOM | 492 | NE2  | HID | 31 | 51.953 | 33.705 | 68.157 | 1.00 | 0.00 | N |
| ATOM | 493 | CD2  | HID | 31 | 51.212 | 34.271 | 67.117 | 1.00 | 0.00 | C |
| ATOM | 494 | HD2  | HID | 31 | 50.631 | 33.702 | 66.411 | 1.00 | 0.00 | H |
| ATOM | 495 | C    | HID | 31 | 49.438 | 37.403 | 64.156 | 1.00 | 0.00 | C |
| ATOM | 496 | O    | HID | 31 | 48.494 | 38.163 | 64.362 | 1.00 | 0.00 | O |
| ATOM | 497 | N    | LEU | 32 | 50.185 | 37.482 | 63.046 | 1.00 | 0.00 | N |
| ATOM | 498 | H    | LEU | 32 | 50.964 | 36.838 | 62.950 | 1.00 | 0.00 | H |
| ATOM | 499 | CA   | LEU | 32 | 49.991 | 38.485 | 61.998 | 1.00 | 0.00 | C |
| ATOM | 500 | HA   | LEU | 32 | 49.916 | 39.458 | 62.484 | 1.00 | 0.00 | H |
| ATOM | 501 | CB   | LEU | 32 | 51.230 | 38.481 | 61.082 | 1.00 | 0.00 | C |
| ATOM | 502 | HB2  | LEU | 32 | 52.141 | 38.440 | 61.683 | 1.00 | 0.00 | H |
| ATOM | 503 | HB3  | LEU | 32 | 51.197 | 37.584 | 60.462 | 1.00 | 0.00 | H |
| ATOM | 504 | CG   | LEU | 32 | 51.279 | 39.726 | 60.180 | 1.00 | 0.00 | C |
| ATOM | 505 | HG   | LEU | 32 | 50.283 | 39.935 | 59.805 | 1.00 | 0.00 | H |
| ATOM | 506 | CD1  | LEU | 32 | 51.786 | 40.948 | 60.944 | 1.00 | 0.00 | C |
| ATOM | 507 | HD11 | LEU | 32 | 51.134 | 41.165 | 61.786 | 1.00 | 0.00 | H |
| ATOM | 508 | HD12 | LEU | 32 | 51.789 | 41.810 | 60.277 | 1.00 | 0.00 | H |
| ATOM | 509 | HD13 | LEU | 32 | 52.796 | 40.763 | 61.308 | 1.00 | 0.00 | H |
| ATOM | 510 | CD2  | LEU | 32 | 52.196 | 39.505 | 58.981 | 1.00 | 0.00 | C |
| ATOM | 511 | HD21 | LEU | 32 | 53.181 | 39.190 | 59.321 | 1.00 | 0.00 | H |
| ATOM | 512 | HD22 | LEU | 32 | 51.768 | 38.739 | 58.337 | 1.00 | 0.00 | H |
| ATOM | 513 | HD23 | LEU | 32 | 52.279 | 40.426 | 58.406 | 1.00 | 0.00 | H |
| ATOM | 514 | C    | LEU | 32 | 48.688 | 38.273 | 61.204 | 1.00 | 0.00 | C |
| ATOM | 515 | O    | LEU | 32 | 47.943 | 39.227 | 60.979 | 1.00 | 0.00 | O |
| ATOM | 516 | N    | LEU | 33 | 48.365 | 37.029 | 60.830 | 1.00 | 0.00 | N |
| ATOM | 517 | H    | LEU | 33 | 49.034 | 36.284 | 61.006 | 1.00 | 0.00 | H |
| ATOM | 518 | CA   | LEU | 33 | 47.117 | 36.700 | 60.123 | 1.00 | 0.00 | C |

|      |     |      |     |    |        |        |        |      |      |   |
|------|-----|------|-----|----|--------|--------|--------|------|------|---|
| ATOM | 519 | HA   | LEU | 33 | 47.058 | 37.308 | 59.220 | 1.00 | 0.00 | H |
| ATOM | 520 | CB   | LEU | 33 | 47.128 | 35.214 | 59.720 | 1.00 | 0.00 | C |
| ATOM | 521 | HB2  | LEU | 33 | 47.378 | 34.621 | 60.600 | 1.00 | 0.00 | H |
| ATOM | 522 | HB3  | LEU | 33 | 46.128 | 34.921 | 59.394 | 1.00 | 0.00 | H |
| ATOM | 523 | CG   | LEU | 33 | 48.125 | 34.903 | 58.588 | 1.00 | 0.00 | C |
| ATOM | 524 | HG   | LEU | 33 | 49.066 | 35.412 | 58.783 | 1.00 | 0.00 | H |
| ATOM | 525 | CD1  | LEU | 33 | 48.403 | 33.404 | 58.522 | 1.00 | 0.00 | C |
| ATOM | 526 | HD11 | LEU | 33 | 48.810 | 33.063 | 59.473 | 1.00 | 0.00 | H |
| ATOM | 527 | HD12 | LEU | 33 | 49.136 | 33.218 | 57.739 | 1.00 | 0.00 | H |
| ATOM | 528 | HD13 | LEU | 33 | 47.481 | 32.864 | 58.300 | 1.00 | 0.00 | H |
| ATOM | 529 | CD2  | LEU | 33 | 47.602 | 35.345 | 57.218 | 1.00 | 0.00 | C |
| ATOM | 530 | HD21 | LEU | 33 | 46.670 | 34.828 | 56.984 | 1.00 | 0.00 | H |
| ATOM | 531 | HD22 | LEU | 33 | 47.425 | 36.417 | 57.208 | 1.00 | 0.00 | H |
| ATOM | 532 | HD23 | LEU | 33 | 48.340 | 35.112 | 56.450 | 1.00 | 0.00 | H |
| ATOM | 533 | C    | LEU | 33 | 45.868 | 37.043 | 60.951 | 1.00 | 0.00 | C |
| ATOM | 534 | O    | LEU | 33 | 44.888 | 37.537 | 60.396 | 1.00 | 0.00 | O |
| ATOM | 535 | N    | LYS | 34 | 45.920 | 36.885 | 62.282 | 1.00 | 0.00 | N |
| ATOM | 536 | H    | LYS | 34 | 46.756 | 36.479 | 62.681 | 1.00 | 0.00 | H |
| ATOM | 537 | CA   | LYS | 34 | 44.837 | 37.312 | 63.187 | 1.00 | 0.00 | C |
| ATOM | 538 | HA   | LYS | 34 | 43.901 | 36.875 | 62.831 | 1.00 | 0.00 | H |
| ATOM | 539 | CB   | LYS | 34 | 45.099 | 36.799 | 64.615 | 1.00 | 0.00 | C |
| ATOM | 540 | HB2  | LYS | 34 | 46.143 | 36.967 | 64.884 | 1.00 | 0.00 | H |
| ATOM | 541 | HB3  | LYS | 34 | 44.473 | 37.359 | 65.313 | 1.00 | 0.00 | H |
| ATOM | 542 | CG   | LYS | 34 | 44.751 | 35.307 | 64.758 | 1.00 | 0.00 | C |
| ATOM | 543 | HG2  | LYS | 34 | 43.694 | 35.170 | 64.527 | 1.00 | 0.00 | H |
| ATOM | 544 | HG3  | LYS | 34 | 45.337 | 34.723 | 64.048 | 1.00 | 0.00 | H |
| ATOM | 545 | CD   | LYS | 34 | 45.020 | 34.797 | 66.182 | 1.00 | 0.00 | C |
| ATOM | 546 | HD2  | LYS | 34 | 46.087 | 34.885 | 66.399 | 1.00 | 0.00 | H |
| ATOM | 547 | HD3  | LYS | 34 | 44.460 | 35.407 | 66.894 | 1.00 | 0.00 | H |
| ATOM | 548 | CE   | LYS | 34 | 44.583 | 33.332 | 66.312 | 1.00 | 0.00 | C |
| ATOM | 549 | HE2  | LYS | 34 | 43.528 | 33.255 | 66.028 | 1.00 | 0.00 | H |
| ATOM | 550 | HE3  | LYS | 34 | 45.163 | 32.730 | 65.607 | 1.00 | 0.00 | H |
| ATOM | 551 | NZ   | LYS | 34 | 44.767 | 32.820 | 67.694 | 1.00 | 0.00 | N |
| ATOM | 552 | HZ1  | LYS | 34 | 45.727 | 32.874 | 68.000 | 1.00 | 0.00 | H |
| ATOM | 553 | HZ2  | LYS | 34 | 44.446 | 31.867 | 67.791 | 1.00 | 0.00 | H |
| ATOM | 554 | HZ3  | LYS | 34 | 44.241 | 33.365 | 68.381 | 1.00 | 0.00 | H |
| ATOM | 555 | C    | LYS | 34 | 44.587 | 38.829 | 63.176 | 1.00 | 0.00 | C |
| ATOM | 556 | O    | LYS | 34 | 43.469 | 39.241 | 63.479 | 1.00 | 0.00 | O |
| ATOM | 557 | N    | LEU | 35 | 45.565 | 39.662 | 62.793 | 1.00 | 0.00 | N |
| ATOM | 558 | H    | LEU | 35 | 46.463 | 39.271 | 62.540 | 1.00 | 0.00 | H |
| ATOM | 559 | CA   | LEU | 35 | 45.315 | 41.089 | 62.530 | 1.00 | 0.00 | C |
| ATOM | 560 | HA   | LEU | 35 | 44.743 | 41.512 | 63.358 | 1.00 | 0.00 | H |
| ATOM | 561 | CB   | LEU | 35 | 46.615 | 41.891 | 62.358 | 1.00 | 0.00 | C |
| ATOM | 562 | HB2  | LEU | 35 | 47.076 | 41.608 | 61.412 | 1.00 | 0.00 | H |
| ATOM | 563 | HB3  | LEU | 35 | 46.339 | 42.944 | 62.276 | 1.00 | 0.00 | H |
| ATOM | 564 | CG   | LEU | 35 | 47.683 | 41.754 | 63.445 | 1.00 | 0.00 | C |
| ATOM | 565 | HG   | LEU | 35 | 48.066 | 40.735 | 63.459 | 1.00 | 0.00 | H |
| ATOM | 566 | CD1  | LEU | 35 | 48.813 | 42.708 | 63.058 | 1.00 | 0.00 | C |
| ATOM | 567 | HD11 | LEU | 35 | 49.125 | 42.522 | 62.031 | 1.00 | 0.00 | H |
| ATOM | 568 | HD12 | LEU | 35 | 49.673 | 42.550 | 63.695 | 1.00 | 0.00 | H |
| ATOM | 569 | HD13 | LEU | 35 | 48.478 | 43.741 | 63.149 | 1.00 | 0.00 | H |
| ATOM | 570 | CD2  | LEU | 35 | 47.136 | 42.110 | 64.828 | 1.00 | 0.00 | C |

|      |     |      |     |    |        |        |        |      |      |   |
|------|-----|------|-----|----|--------|--------|--------|------|------|---|
| ATOM | 571 | HD21 | LEU | 35 | 46.761 | 43.133 | 64.834 | 1.00 | 0.00 | H |
| ATOM | 572 | HD22 | LEU | 35 | 46.337 | 41.420 | 65.093 | 1.00 | 0.00 | H |
| ATOM | 573 | HD23 | LEU | 35 | 47.922 | 42.008 | 65.570 | 1.00 | 0.00 | H |
| ATOM | 574 | C    | LEU | 35 | 44.494 | 41.284 | 61.255 | 1.00 | 0.00 | C |
| ATOM | 575 | O    | LEU | 35 | 43.502 | 42.006 | 61.265 | 1.00 | 0.00 | O |
| ATOM | 576 | N    | LEU | 36 | 44.925 | 40.642 | 60.165 | 1.00 | 0.00 | N |
| ATOM | 577 | H    | LEU | 36 | 45.730 | 40.037 | 60.263 | 1.00 | 0.00 | H |
| ATOM | 578 | CA   | LEU | 36 | 44.316 | 40.771 | 58.842 | 1.00 | 0.00 | C |
| ATOM | 579 | HA   | LEU | 36 | 44.302 | 41.823 | 58.556 | 1.00 | 0.00 | H |
| ATOM | 580 | CB   | LEU | 36 | 45.148 | 39.971 | 57.823 | 1.00 | 0.00 | C |
| ATOM | 581 | HB2  | LEU | 36 | 45.317 | 38.969 | 58.220 | 1.00 | 0.00 | H |
| ATOM | 582 | HB3  | LEU | 36 | 44.575 | 39.861 | 56.907 | 1.00 | 0.00 | H |
| ATOM | 583 | CG   | LEU | 36 | 46.498 | 40.605 | 57.458 | 1.00 | 0.00 | C |
| ATOM | 584 | HG   | LEU | 36 | 47.011 | 40.918 | 58.366 | 1.00 | 0.00 | H |
| ATOM | 585 | CD1  | LEU | 36 | 47.364 | 39.569 | 56.740 | 1.00 | 0.00 | C |
| ATOM | 586 | HD11 | LEU | 36 | 47.633 | 38.777 | 57.437 | 1.00 | 0.00 | H |
| ATOM | 587 | HD12 | LEU | 36 | 48.276 | 40.033 | 56.368 | 1.00 | 0.00 | H |
| ATOM | 588 | HD13 | LEU | 36 | 46.810 | 39.145 | 55.903 | 1.00 | 0.00 | H |
| ATOM | 589 | CD2  | LEU | 36 | 46.324 | 41.810 | 56.530 | 1.00 | 0.00 | C |
| ATOM | 590 | HD21 | LEU | 36 | 45.825 | 41.506 | 55.609 | 1.00 | 0.00 | H |
| ATOM | 591 | HD22 | LEU | 36 | 45.734 | 42.582 | 57.020 | 1.00 | 0.00 | H |
| ATOM | 592 | HD23 | LEU | 36 | 47.299 | 42.231 | 56.284 | 1.00 | 0.00 | H |
| ATOM | 593 | C    | LEU | 36 | 42.860 | 40.297 | 58.851 | 1.00 | 0.00 | C |
| ATOM | 594 | O    | LEU | 36 | 41.985 | 41.012 | 58.368 | 1.00 | 0.00 | O |
| ATOM | 595 | N    | GLU | 37 | 42.586 | 39.126 | 59.432 | 1.00 | 0.00 | N |
| ATOM | 596 | H    | GLU | 37 | 43.354 | 38.565 | 59.790 | 1.00 | 0.00 | H |
| ATOM | 597 | CA   | GLU | 37 | 41.222 | 38.592 | 59.512 | 1.00 | 0.00 | C |
| ATOM | 598 | HA   | GLU | 37 | 40.765 | 38.670 | 58.524 | 1.00 | 0.00 | H |
| ATOM | 599 | CB   | GLU | 37 | 41.234 | 37.093 | 59.876 | 1.00 | 0.00 | C |
| ATOM | 600 | HB2  | GLU | 37 | 41.718 | 36.943 | 60.842 | 1.00 | 0.00 | H |
| ATOM | 601 | HB3  | GLU | 37 | 40.197 | 36.761 | 59.951 | 1.00 | 0.00 | H |
| ATOM | 602 | CG   | GLU | 37 | 41.949 | 36.255 | 58.795 | 1.00 | 0.00 | C |
| ATOM | 603 | HG2  | GLU | 37 | 41.850 | 36.765 | 57.833 | 1.00 | 0.00 | H |
| ATOM | 604 | HG3  | GLU | 37 | 43.014 | 36.208 | 59.024 | 1.00 | 0.00 | H |
| ATOM | 605 | CD   | GLU | 37 | 41.400 | 34.828 | 58.632 | 1.00 | 0.00 | C |
| ATOM | 606 | OE1  | GLU | 37 | 41.125 | 34.132 | 59.645 | 1.00 | 0.00 | O |
| ATOM | 607 | OE2  | GLU | 37 | 41.287 | 34.378 | 57.464 | 1.00 | 0.00 | O |
| ATOM | 608 | C    | GLU | 37 | 40.321 | 39.421 | 60.445 | 1.00 | 0.00 | C |
| ATOM | 609 | O    | GLU | 37 | 39.171 | 39.663 | 60.088 | 1.00 | 0.00 | O |
| ATOM | 610 | N    | GLN | 38 | 40.817 | 39.946 | 61.580 | 1.00 | 0.00 | N |
| ATOM | 611 | H    | GLN | 38 | 41.771 | 39.745 | 61.848 | 1.00 | 0.00 | H |
| ATOM | 612 | CA   | GLN | 38 | 40.006 | 40.840 | 62.428 | 1.00 | 0.00 | C |
| ATOM | 613 | HA   | GLN | 38 | 39.023 | 40.380 | 62.527 | 1.00 | 0.00 | H |
| ATOM | 614 | CB   | GLN | 38 | 40.579 | 40.926 | 63.856 | 1.00 | 0.00 | C |
| ATOM | 615 | HB2  | GLN | 38 | 40.674 | 39.913 | 64.250 | 1.00 | 0.00 | H |
| ATOM | 616 | HB3  | GLN | 38 | 41.576 | 41.367 | 63.818 | 1.00 | 0.00 | H |
| ATOM | 617 | CG   | GLN | 38 | 39.692 | 41.765 | 64.809 | 1.00 | 0.00 | C |
| ATOM | 618 | HG2  | GLN | 38 | 40.211 | 42.692 | 65.055 | 1.00 | 0.00 | H |
| ATOM | 619 | HG3  | GLN | 38 | 38.756 | 42.028 | 64.319 | 1.00 | 0.00 | H |
| ATOM | 620 | CD   | GLN | 38 | 39.312 | 41.047 | 66.101 | 1.00 | 0.00 | C |
| ATOM | 621 | OE1  | GLN | 38 | 39.856 | 41.304 | 67.172 | 1.00 | 0.00 | O |
| ATOM | 622 | NE2  | GLN | 38 | 38.365 | 40.137 | 66.059 | 1.00 | 0.00 | N |

|      |     |      |     |    |        |        |        |      |      |   |
|------|-----|------|-----|----|--------|--------|--------|------|------|---|
| ATOM | 623 | HE21 | GLN | 38 | 38.085 | 39.655 | 66.899 | 1.00 | 0.00 | H |
| ATOM | 624 | HE22 | GLN | 38 | 37.855 | 39.965 | 65.183 | 1.00 | 0.00 | H |
| ATOM | 625 | C    | GLN | 38 | 39.784 | 42.230 | 61.791 | 1.00 | 0.00 | C |
| ATOM | 626 | O    | GLN | 38 | 38.703 | 42.800 | 61.929 | 1.00 | 0.00 | O |
| ATOM | 627 | N    | PHE | 39 | 40.752 | 42.782 | 61.053 | 1.00 | 0.00 | N |
| ATOM | 628 | H    | PHE | 39 | 41.648 | 42.310 | 60.979 | 1.00 | 0.00 | H |
| ATOM | 629 | CA   | PHE | 39 | 40.547 | 44.021 | 60.289 | 1.00 | 0.00 | C |
| ATOM | 630 | HA   | PHE | 39 | 40.173 | 44.793 | 60.962 | 1.00 | 0.00 | H |
| ATOM | 631 | CB   | PHE | 39 | 41.883 | 44.497 | 59.704 | 1.00 | 0.00 | C |
| ATOM | 632 | HB2  | PHE | 39 | 42.565 | 44.725 | 60.525 | 1.00 | 0.00 | H |
| ATOM | 633 | HB3  | PHE | 39 | 42.326 | 43.684 | 59.127 | 1.00 | 0.00 | H |
| ATOM | 634 | CG   | PHE | 39 | 41.766 | 45.725 | 58.818 | 1.00 | 0.00 | C |
| ATOM | 635 | CD1  | PHE | 39 | 41.435 | 46.971 | 59.385 | 1.00 | 0.00 | C |
| ATOM | 636 | HD1  | PHE | 39 | 41.260 | 47.055 | 60.447 | 1.00 | 0.00 | H |
| ATOM | 637 | CE1  | PHE | 39 | 41.327 | 48.111 | 58.570 | 1.00 | 0.00 | C |
| ATOM | 638 | HE1  | PHE | 39 | 41.066 | 49.064 | 59.005 | 1.00 | 0.00 | H |
| ATOM | 639 | CZ   | PHE | 39 | 41.554 | 48.015 | 57.186 | 1.00 | 0.00 | C |
| ATOM | 640 | HZ   | PHE | 39 | 41.476 | 48.894 | 56.560 | 1.00 | 0.00 | H |
| ATOM | 641 | CE2  | PHE | 39 | 41.880 | 46.773 | 56.616 | 1.00 | 0.00 | C |
| ATOM | 642 | HE2  | PHE | 39 | 42.059 | 46.701 | 55.551 | 1.00 | 0.00 | H |
| ATOM | 643 | CD2  | PHE | 39 | 41.982 | 45.629 | 57.429 | 1.00 | 0.00 | C |
| ATOM | 644 | HD2  | PHE | 39 | 42.239 | 44.680 | 56.980 | 1.00 | 0.00 | H |
| ATOM | 645 | C    | PHE | 39 | 39.489 | 43.835 | 59.190 | 1.00 | 0.00 | C |
| ATOM | 646 | O    | PHE | 39 | 38.534 | 44.611 | 59.110 | 1.00 | 0.00 | O |
| ATOM | 647 | N    | PHE | 40 | 39.609 | 42.757 | 58.406 | 1.00 | 0.00 | N |
| ATOM | 648 | H    | PHE | 40 | 40.419 | 42.159 | 58.535 | 1.00 | 0.00 | H |
| ATOM | 649 | CA   | PHE | 40 | 38.622 | 42.354 | 57.399 | 1.00 | 0.00 | C |
| ATOM | 650 | HA   | PHE | 40 | 38.537 | 43.147 | 56.655 | 1.00 | 0.00 | H |
| ATOM | 651 | CB   | PHE | 40 | 39.145 | 41.077 | 56.711 | 1.00 | 0.00 | C |
| ATOM | 652 | HB2  | PHE | 40 | 40.187 | 41.261 | 56.447 | 1.00 | 0.00 | H |
| ATOM | 653 | HB3  | PHE | 40 | 39.150 | 40.267 | 57.441 | 1.00 | 0.00 | H |
| ATOM | 654 | CG   | PHE | 40 | 38.448 | 40.557 | 55.457 | 1.00 | 0.00 | C |
| ATOM | 655 | CD1  | PHE | 40 | 39.228 | 40.231 | 54.331 | 1.00 | 0.00 | C |
| ATOM | 656 | HD1  | PHE | 40 | 40.283 | 40.450 | 54.328 | 1.00 | 0.00 | H |
| ATOM | 657 | CE1  | PHE | 40 | 38.661 | 39.571 | 53.227 | 1.00 | 0.00 | C |
| ATOM | 658 | HE1  | PHE | 40 | 39.282 | 39.316 | 52.380 | 1.00 | 0.00 | H |
| ATOM | 659 | CZ   | PHE | 40 | 37.294 | 39.252 | 53.227 | 1.00 | 0.00 | C |
| ATOM | 660 | HZ   | PHE | 40 | 36.855 | 38.740 | 52.382 | 1.00 | 0.00 | H |
| ATOM | 661 | CE2  | PHE | 40 | 36.490 | 39.641 | 54.310 | 1.00 | 0.00 | C |
| ATOM | 662 | HE2  | PHE | 40 | 35.432 | 39.426 | 54.295 | 1.00 | 0.00 | H |
| ATOM | 663 | CD2  | PHE | 40 | 37.068 | 40.273 | 55.427 | 1.00 | 0.00 | C |
| ATOM | 664 | HD2  | PHE | 40 | 36.446 | 40.505 | 56.273 | 1.00 | 0.00 | H |
| ATOM | 665 | C    | PHE | 40 | 37.240 | 42.160 | 58.043 | 1.00 | 0.00 | C |
| ATOM | 666 | O    | PHE | 40 | 36.251 | 42.663 | 57.518 | 1.00 | 0.00 | O |
| ATOM | 667 | N    | GLU | 41 | 37.161 | 41.474 | 59.188 | 1.00 | 0.00 | N |
| ATOM | 668 | H    | GLU | 41 | 38.010 | 41.037 | 59.540 | 1.00 | 0.00 | H |
| ATOM | 669 | CA   | GLU | 41 | 35.935 | 41.267 | 59.969 | 1.00 | 0.00 | C |
| ATOM | 670 | HA   | GLU | 41 | 35.216 | 40.719 | 59.360 | 1.00 | 0.00 | H |
| ATOM | 671 | CB   | GLU | 41 | 36.269 | 40.405 | 61.202 | 1.00 | 0.00 | C |
| ATOM | 672 | HB2  | GLU | 41 | 36.575 | 39.414 | 60.863 | 1.00 | 0.00 | H |
| ATOM | 673 | HB3  | GLU | 41 | 37.105 | 40.868 | 61.714 | 1.00 | 0.00 | H |
| ATOM | 674 | CG   | GLU | 41 | 35.134 | 40.242 | 62.224 | 1.00 | 0.00 | C |



|      |     |      |     |    |        |        |        |      |      |   |
|------|-----|------|-----|----|--------|--------|--------|------|------|---|
| ATOM | 675 | HG2  | GLU | 41 | 34.808 | 41.224 | 62.572 | 1.00 | 0.00 | H |
| ATOM | 676 | HG3  | GLU | 41 | 34.288 | 39.757 | 61.732 | 1.00 | 0.00 | H |
| ATOM | 677 | CD   | GLU | 41 | 35.563 | 39.423 | 63.452 | 1.00 | 0.00 | C |
| ATOM | 678 | OE1  | GLU | 41 | 36.742 | 39.481 | 63.883 | 1.00 | 0.00 | O |
| ATOM | 679 | OE2  | GLU | 41 | 34.696 | 38.713 | 64.021 | 1.00 | 0.00 | O |
| ATOM | 680 | C    | GLU | 41 | 35.265 | 42.588 | 60.368 | 1.00 | 0.00 | C |
| ATOM | 681 | O    | GLU | 41 | 34.087 | 42.770 | 60.070 | 1.00 | 0.00 | O |
| ATOM | 682 | N    | ILE | 42 | 36.000 | 43.517 | 60.994 | 1.00 | 0.00 | N |
| ATOM | 683 | H    | ILE | 42 | 36.974 | 43.301 | 61.191 | 1.00 | 0.00 | H |
| ATOM | 684 | CA   | ILE | 42 | 35.454 | 44.801 | 61.469 | 1.00 | 0.00 | C |
| ATOM | 685 | HA   | ILE | 42 | 34.597 | 44.597 | 62.112 | 1.00 | 0.00 | H |
| ATOM | 686 | CB   | ILE | 42 | 36.515 | 45.567 | 62.299 | 1.00 | 0.00 | C |
| ATOM | 687 | HB   | ILE | 42 | 37.431 | 45.622 | 61.707 | 1.00 | 0.00 | H |
| ATOM | 688 | CG2  | ILE | 42 | 36.058 | 47.006 | 62.613 | 1.00 | 0.00 | C |
| ATOM | 689 | HG21 | ILE | 42 | 36.023 | 47.602 | 61.700 | 1.00 | 0.00 | H |
| ATOM | 690 | HG22 | ILE | 42 | 36.752 | 47.491 | 63.296 | 1.00 | 0.00 | H |
| ATOM | 691 | HG23 | ILE | 42 | 35.066 | 46.993 | 63.065 | 1.00 | 0.00 | H |
| ATOM | 692 | CG1  | ILE | 42 | 36.825 | 44.835 | 63.627 | 1.00 | 0.00 | C |
| ATOM | 693 | HG12 | ILE | 42 | 36.043 | 45.048 | 64.357 | 1.00 | 0.00 | H |
| ATOM | 694 | HG13 | ILE | 42 | 36.831 | 43.758 | 63.466 | 1.00 | 0.00 | H |
| ATOM | 695 | CD1  | ILE | 42 | 38.192 | 45.217 | 64.216 | 1.00 | 0.00 | C |
| ATOM | 696 | HD11 | ILE | 42 | 38.980 | 45.026 | 63.487 | 1.00 | 0.00 | H |
| ATOM | 697 | HD12 | ILE | 42 | 38.383 | 44.613 | 65.103 | 1.00 | 0.00 | H |
| ATOM | 698 | HD13 | ILE | 42 | 38.212 | 46.269 | 64.496 | 1.00 | 0.00 | H |
| ATOM | 699 | C    | ILE | 42 | 34.932 | 45.642 | 60.295 | 1.00 | 0.00 | C |
| ATOM | 700 | O    | ILE | 42 | 33.814 | 46.157 | 60.351 | 1.00 | 0.00 | O |
| ATOM | 701 | N    | VAL | 43 | 35.715 | 45.753 | 59.216 | 1.00 | 0.00 | N |
| ATOM | 702 | H    | VAL | 43 | 36.623 | 45.296 | 59.228 | 1.00 | 0.00 | H |
| ATOM | 703 | CA   | VAL | 43 | 35.317 | 46.502 | 58.013 | 1.00 | 0.00 | C |
| ATOM | 704 | HA   | VAL | 43 | 34.989 | 47.496 | 58.319 | 1.00 | 0.00 | H |
| ATOM | 705 | CB   | VAL | 43 | 36.526 | 46.672 | 57.067 | 1.00 | 0.00 | C |
| ATOM | 706 | HB   | VAL | 43 | 36.960 | 45.692 | 56.861 | 1.00 | 0.00 | H |
| ATOM | 707 | CG1  | VAL | 43 | 36.147 | 47.319 | 55.730 | 1.00 | 0.00 | C |
| ATOM | 708 | HG11 | VAL | 43 | 37.044 | 47.496 | 55.135 | 1.00 | 0.00 | H |
| ATOM | 709 | HG12 | VAL | 43 | 35.494 | 46.658 | 55.165 | 1.00 | 0.00 | H |
| ATOM | 710 | HG13 | VAL | 43 | 35.643 | 48.269 | 55.906 | 1.00 | 0.00 | H |
| ATOM | 711 | CG2  | VAL | 43 | 37.597 | 47.565 | 57.711 | 1.00 | 0.00 | C |
| ATOM | 712 | HG21 | VAL | 43 | 37.195 | 48.560 | 57.902 | 1.00 | 0.00 | H |
| ATOM | 713 | HG22 | VAL | 43 | 38.457 | 47.650 | 57.045 | 1.00 | 0.00 | H |
| ATOM | 714 | HG23 | VAL | 43 | 37.943 | 47.133 | 58.649 | 1.00 | 0.00 | H |
| ATOM | 715 | C    | VAL | 43 | 34.117 | 45.841 | 57.318 | 1.00 | 0.00 | C |
| ATOM | 716 | O    | VAL | 43 | 33.213 | 46.539 | 56.858 | 1.00 | 0.00 | O |
| ATOM | 717 | N    | CYS | 44 | 34.066 | 44.507 | 57.264 | 1.00 | 0.00 | N |
| ATOM | 718 | H    | CYS | 44 | 34.833 | 43.985 | 57.676 | 1.00 | 0.00 | H |
| ATOM | 719 | CA   | CYS | 44 | 32.977 | 43.742 | 56.648 | 1.00 | 0.00 | C |
| ATOM | 720 | HA   | CYS | 44 | 32.776 | 44.152 | 55.660 | 1.00 | 0.00 | H |
| ATOM | 721 | CB   | CYS | 44 | 33.447 | 42.285 | 56.497 | 1.00 | 0.00 | C |
| ATOM | 722 | HB2  | CYS | 44 | 34.361 | 42.263 | 55.902 | 1.00 | 0.00 | H |
| ATOM | 723 | HB3  | CYS | 44 | 33.679 | 41.883 | 57.486 | 1.00 | 0.00 | H |
| ATOM | 724 | SG   | CYS | 44 | 32.192 | 41.233 | 55.711 | 1.00 | 0.00 | S |
| ATOM | 725 | HG   | CYS | 44 | 31.938 | 42.025 | 54.665 | 1.00 | 0.00 | H |
| ATOM | 726 | C    | CYS | 44 | 31.656 | 43.844 | 57.418 | 1.00 | 0.00 | C |

|      |     |      |     |    |        |        |        |      |      |   |
|------|-----|------|-----|----|--------|--------|--------|------|------|---|
| ATOM | 727 | O    | CYS | 44 | 30.633 | 44.173 | 56.815 | 1.00 | 0.00 | O |
| ATOM | 728 | N    | ASP | 45 | 31.681 | 43.582 | 58.726 | 1.00 | 0.00 | N |
| ATOM | 729 | H    | ASP | 45 | 32.574 | 43.362 | 59.161 | 1.00 | 0.00 | H |
| ATOM | 730 | CA   | ASP | 45 | 30.488 | 43.509 | 59.575 | 1.00 | 0.00 | C |
| ATOM | 731 | HA   | ASP | 45 | 29.800 | 42.775 | 59.151 | 1.00 | 0.00 | H |
| ATOM | 732 | CB   | ASP | 45 | 30.914 | 43.025 | 60.973 | 1.00 | 0.00 | C |
| ATOM | 733 | HB2  | ASP | 45 | 31.502 | 42.113 | 60.862 | 1.00 | 0.00 | H |
| ATOM | 734 | HB3  | ASP | 45 | 31.553 | 43.781 | 61.433 | 1.00 | 0.00 | H |
| ATOM | 735 | CG   | ASP | 45 | 29.746 | 42.705 | 61.912 | 1.00 | 0.00 | C |
| ATOM | 736 | OD1  | ASP | 45 | 28.794 | 41.983 | 61.533 | 1.00 | 0.00 | O |
| ATOM | 737 | OD2  | ASP | 45 | 29.761 | 43.154 | 63.080 | 1.00 | 0.00 | O |
| ATOM | 738 | C    | ASP | 45 | 29.748 | 44.855 | 59.631 | 1.00 | 0.00 | C |
| ATOM | 739 | O    | ASP | 45 | 28.524 | 44.886 | 59.545 | 1.00 | 0.00 | O |
| ATOM | 740 | N    | GLU | 46 | 30.470 | 45.978 | 59.702 | 1.00 | 0.00 | N |
| ATOM | 741 | H    | GLU | 46 | 31.477 | 45.906 | 59.797 | 1.00 | 0.00 | H |
| ATOM | 742 | CA   | GLU | 46 | 29.855 | 47.305 | 59.612 | 1.00 | 0.00 | C |
| ATOM | 743 | HA   | GLU | 46 | 28.913 | 47.288 | 60.159 | 1.00 | 0.00 | H |
| ATOM | 744 | CB   | GLU | 46 | 30.766 | 48.352 | 60.273 | 1.00 | 0.00 | C |
| ATOM | 745 | HB2  | GLU | 46 | 31.785 | 48.240 | 59.897 | 1.00 | 0.00 | H |
| ATOM | 746 | HB3  | GLU | 46 | 30.428 | 49.341 | 59.984 | 1.00 | 0.00 | H |
| ATOM | 747 | CG   | GLU | 46 | 30.780 | 48.277 | 61.813 | 1.00 | 0.00 | C |
| ATOM | 748 | HG2  | GLU | 46 | 31.337 | 47.386 | 62.111 | 1.00 | 0.00 | H |
| ATOM | 749 | HG3  | GLU | 46 | 31.325 | 49.142 | 62.197 | 1.00 | 0.00 | H |
| ATOM | 750 | CD   | GLU | 46 | 29.380 | 48.236 | 62.454 | 1.00 | 0.00 | C |
| ATOM | 751 | OE1  | GLU | 46 | 28.626 | 49.237 | 62.406 | 1.00 | 0.00 | O |
| ATOM | 752 | OE2  | GLU | 46 | 29.000 | 47.187 | 63.022 | 1.00 | 0.00 | O |
| ATOM | 753 | C    | GLU | 46 | 29.457 | 47.687 | 58.175 | 1.00 | 0.00 | C |
| ATOM | 754 | O    | GLU | 46 | 28.320 | 48.111 | 57.967 | 1.00 | 0.00 | O |
| ATOM | 755 | N    | THR | 47 | 30.307 | 47.481 | 57.158 | 1.00 | 0.00 | N |
| ATOM | 756 | H    | THR | 47 | 31.220 | 47.084 | 57.349 | 1.00 | 0.00 | H |
| ATOM | 757 | CA   | THR | 47 | 29.958 | 47.871 | 55.773 | 1.00 | 0.00 | C |
| ATOM | 758 | HA   | THR | 47 | 29.739 | 48.939 | 55.772 | 1.00 | 0.00 | H |
| ATOM | 759 | CB   | THR | 47 | 31.108 | 47.637 | 54.781 | 1.00 | 0.00 | C |
| ATOM | 760 | HB   | THR | 47 | 31.354 | 46.575 | 54.747 | 1.00 | 0.00 | H |
| ATOM | 761 | CG2  | THR | 47 | 30.770 | 48.114 | 53.368 | 1.00 | 0.00 | C |
| ATOM | 762 | HG21 | THR | 47 | 30.357 | 49.123 | 53.408 | 1.00 | 0.00 | H |
| ATOM | 763 | HG22 | THR | 47 | 30.050 | 47.439 | 52.909 | 1.00 | 0.00 | H |
| ATOM | 764 | HG23 | THR | 47 | 31.670 | 48.129 | 52.763 | 1.00 | 0.00 | H |
| ATOM | 765 | OG1  | THR | 47 | 32.255 | 48.354 | 55.156 | 1.00 | 0.00 | O |
| ATOM | 766 | HG1  | THR | 47 | 32.656 | 47.859 | 55.894 | 1.00 | 0.00 | H |
| ATOM | 767 | C    | THR | 47 | 28.706 | 47.151 | 55.257 | 1.00 | 0.00 | C |
| ATOM | 768 | O    | THR | 47 | 27.882 | 47.775 | 54.586 | 1.00 | 0.00 | O |
| ATOM | 769 | N    | GLU | 48 | 28.528 | 45.864 | 55.587 | 1.00 | 0.00 | N |
| ATOM | 770 | H    | GLU | 48 | 29.233 | 45.404 | 56.161 | 1.00 | 0.00 | H |
| ATOM | 771 | CA   | GLU | 48 | 27.337 | 45.089 | 55.205 | 1.00 | 0.00 | C |
| ATOM | 772 | HA   | GLU | 48 | 27.237 | 45.130 | 54.119 | 1.00 | 0.00 | H |
| ATOM | 773 | CB   | GLU | 48 | 27.508 | 43.609 | 55.617 | 1.00 | 0.00 | C |
| ATOM | 774 | HB2  | GLU | 48 | 28.414 | 43.221 | 55.148 | 1.00 | 0.00 | H |
| ATOM | 775 | HB3  | GLU | 48 | 27.624 | 43.545 | 56.700 | 1.00 | 0.00 | H |
| ATOM | 776 | CG   | GLU | 48 | 26.318 | 42.732 | 55.181 | 1.00 | 0.00 | C |
| ATOM | 777 | HG2  | GLU | 48 | 25.422 | 43.049 | 55.719 | 1.00 | 0.00 | H |
| ATOM | 778 | HG3  | GLU | 48 | 26.143 | 42.892 | 54.115 | 1.00 | 0.00 | H |

|      |     |     |     |    |        |        |        |      |      |   |
|------|-----|-----|-----|----|--------|--------|--------|------|------|---|
| ATOM | 779 | CD  | GLU | 48 | 26.534 | 41.230 | 55.440 | 1.00 | 0.00 | C |
| ATOM | 780 | OE1 | GLU | 48 | 26.755 | 40.821 | 56.605 | 1.00 | 0.00 | O |
| ATOM | 781 | OE2 | GLU | 48 | 26.416 | 40.421 | 54.487 | 1.00 | 0.00 | O |
| ATOM | 782 | C   | GLU | 48 | 26.050 | 45.691 | 55.794 | 1.00 | 0.00 | C |
| ATOM | 783 | O   | GLU | 48 | 25.059 | 45.836 | 55.073 | 1.00 | 0.00 | O |
| ATOM | 784 | N   | LYS | 49 | 26.074 | 46.091 | 57.076 | 1.00 | 0.00 | N |
| ATOM | 785 | H   | LYS | 49 | 26.943 | 45.974 | 57.588 | 1.00 | 0.00 | H |
| ATOM | 786 | CA  | LYS | 49 | 24.953 | 46.769 | 57.758 | 1.00 | 0.00 | C |
| ATOM | 787 | HA  | LYS | 49 | 24.040 | 46.185 | 57.635 | 1.00 | 0.00 | H |
| ATOM | 788 | CB  | LYS | 49 | 25.264 | 46.930 | 59.258 | 1.00 | 0.00 | C |
| ATOM | 789 | HB2 | LYS | 49 | 26.189 | 47.500 | 59.350 | 1.00 | 0.00 | H |
| ATOM | 790 | HB3 | LYS | 49 | 24.469 | 47.514 | 59.726 | 1.00 | 0.00 | H |
| ATOM | 791 | CG  | LYS | 49 | 25.407 | 45.609 | 60.032 | 1.00 | 0.00 | C |
| ATOM | 792 | HG2 | LYS | 49 | 24.424 | 45.164 | 60.193 | 1.00 | 0.00 | H |
| ATOM | 793 | HG3 | LYS | 49 | 26.005 | 44.909 | 59.451 | 1.00 | 0.00 | H |
| ATOM | 794 | CD  | LYS | 49 | 26.094 | 45.864 | 61.384 | 1.00 | 0.00 | C |
| ATOM | 795 | HD2 | LYS | 49 | 26.934 | 46.543 | 61.229 | 1.00 | 0.00 | H |
| ATOM | 796 | HD3 | LYS | 49 | 25.394 | 46.333 | 62.078 | 1.00 | 0.00 | H |
| ATOM | 797 | CE  | LYS | 49 | 26.646 | 44.567 | 61.982 | 1.00 | 0.00 | C |
| ATOM | 798 | HE2 | LYS | 49 | 25.828 | 43.937 | 62.342 | 1.00 | 0.00 | H |
| ATOM | 799 | HE3 | LYS | 49 | 27.171 | 44.022 | 61.191 | 1.00 | 0.00 | H |
| ATOM | 800 | NZ  | LYS | 49 | 27.606 | 44.856 | 63.069 | 1.00 | 0.00 | N |
| ATOM | 801 | HZ1 | LYS | 49 | 28.173 | 44.040 | 63.292 | 1.00 | 0.00 | H |
| ATOM | 802 | HZ2 | LYS | 49 | 27.166 | 45.211 | 63.909 | 1.00 | 0.00 | H |
| ATOM | 803 | HZ3 | LYS | 49 | 28.270 | 45.579 | 62.787 | 1.00 | 0.00 | H |
| ATOM | 804 | C   | LYS | 49 | 24.684 | 48.149 | 57.158 | 1.00 | 0.00 | C |
| ATOM | 805 | O   | LYS | 49 | 23.534 | 48.544 | 56.993 | 1.00 | 0.00 | O |
| ATOM | 806 | N   | HIE | 50 | 25.735 | 48.894 | 56.813 | 1.00 | 0.00 | N |
| ATOM | 807 | H   | HIE | 50 | 26.658 | 48.513 | 57.009 | 1.00 | 0.00 | H |
| ATOM | 808 | CA  | HIE | 50 | 25.656 | 50.276 | 56.316 | 1.00 | 0.00 | C |
| ATOM | 809 | HA  | HIE | 50 | 24.840 | 50.775 | 56.839 | 1.00 | 0.00 | H |
| ATOM | 810 | CB  | HIE | 50 | 26.947 | 51.033 | 56.665 | 1.00 | 0.00 | C |
| ATOM | 811 | HB2 | HIE | 50 | 27.765 | 50.607 | 56.082 | 1.00 | 0.00 | H |
| ATOM | 812 | HB3 | HIE | 50 | 26.836 | 52.077 | 56.368 | 1.00 | 0.00 | H |
| ATOM | 813 | CG  | HIE | 50 | 27.364 | 51.021 | 58.119 | 1.00 | 0.00 | C |
| ATOM | 814 | ND1 | HIE | 50 | 28.614 | 51.451 | 58.552 | 1.00 | 0.00 | N |
| ATOM | 815 | CE1 | HIE | 50 | 28.663 | 51.199 | 59.864 | 1.00 | 0.00 | C |
| ATOM | 816 | HE1 | HIE | 50 | 29.534 | 51.341 | 60.489 | 1.00 | 0.00 | H |
| ATOM | 817 | NE2 | HIE | 50 | 27.524 | 50.634 | 60.277 | 1.00 | 0.00 | N |
| ATOM | 818 | HE2 | HIE | 50 | 27.447 | 50.166 | 61.181 | 1.00 | 0.00 | H |
| ATOM | 819 | CD2 | HIE | 50 | 26.674 | 50.538 | 59.198 | 1.00 | 0.00 | C |
| ATOM | 820 | HD2 | HIE | 50 | 25.695 | 50.083 | 59.188 | 1.00 | 0.00 | H |
| ATOM | 821 | C   | HIE | 50 | 25.305 | 50.360 | 54.819 | 1.00 | 0.00 | C |
| ATOM | 822 | O   | HIE | 50 | 25.749 | 51.274 | 54.123 | 1.00 | 0.00 | O |
| ATOM | 823 | N   | SER | 51 | 24.518 | 49.408 | 54.304 | 1.00 | 0.00 | N |
| ATOM | 824 | H   | SER | 51 | 24.170 | 48.718 | 54.961 | 1.00 | 0.00 | H |
| ATOM | 825 | CA  | SER | 51 | 24.072 | 49.261 | 52.902 | 1.00 | 0.00 | C |
| ATOM | 826 | HA  | SER | 51 | 23.474 | 48.350 | 52.873 | 1.00 | 0.00 | H |
| ATOM | 827 | CB  | SER | 51 | 23.127 | 50.410 | 52.512 | 1.00 | 0.00 | C |
| ATOM | 828 | HB2 | SER | 51 | 22.607 | 50.152 | 51.587 | 1.00 | 0.00 | H |
| ATOM | 829 | HB3 | SER | 51 | 22.384 | 50.550 | 53.299 | 1.00 | 0.00 | H |
| ATOM | 830 | OG  | SER | 51 | 23.846 | 51.616 | 52.316 | 1.00 | 0.00 | O |

|      |     |      |     |    |        |        |        |      |      |   |
|------|-----|------|-----|----|--------|--------|--------|------|------|---|
| ATOM | 831 | HG   | SER | 51 | 24.516 | 51.649 | 53.029 | 1.00 | 0.00 | H |
| ATOM | 832 | C    | SER | 51 | 25.175 | 49.048 | 51.848 | 1.00 | 0.00 | C |
| ATOM | 833 | O    | SER | 51 | 24.872 | 49.012 | 50.653 | 1.00 | 0.00 | O |
| ATOM | 834 | N    | GLY | 52 | 26.438 | 48.907 | 52.254 | 1.00 | 0.00 | N |
| ATOM | 835 | H    | GLY | 52 | 26.624 | 48.824 | 53.246 | 1.00 | 0.00 | H |
| ATOM | 836 | CA   | GLY | 52 | 27.570 | 48.717 | 51.348 | 1.00 | 0.00 | C |
| ATOM | 837 | HA2  | GLY | 52 | 27.398 | 49.270 | 50.423 | 1.00 | 0.00 | H |
| ATOM | 838 | HA3  | GLY | 52 | 28.469 | 49.123 | 51.809 | 1.00 | 0.00 | H |
| ATOM | 839 | C    | GLY | 52 | 27.828 | 47.252 | 51.000 | 1.00 | 0.00 | C |
| ATOM | 840 | O    | GLY | 52 | 27.218 | 46.333 | 51.559 | 1.00 | 0.00 | O |
| ATOM | 841 | N    | LYS | 53 | 28.775 | 47.033 | 50.083 | 1.00 | 0.00 | N |
| ATOM | 842 | H    | LYS | 53 | 29.157 | 47.852 | 49.612 | 1.00 | 0.00 | H |
| ATOM | 843 | CA   | LYS | 53 | 29.222 | 45.705 | 49.639 | 1.00 | 0.00 | C |
| ATOM | 844 | HA   | LYS | 53 | 28.978 | 44.971 | 50.409 | 1.00 | 0.00 | H |
| ATOM | 845 | CB   | LYS | 53 | 28.439 | 45.339 | 48.363 | 1.00 | 0.00 | C |
| ATOM | 846 | HB2  | LYS | 53 | 27.371 | 45.417 | 48.578 | 1.00 | 0.00 | H |
| ATOM | 847 | HB3  | LYS | 53 | 28.678 | 46.058 | 47.578 | 1.00 | 0.00 | H |
| ATOM | 848 | CG   | LYS | 53 | 28.728 | 43.918 | 47.854 | 1.00 | 0.00 | C |
| ATOM | 849 | HG2  | LYS | 53 | 29.787 | 43.824 | 47.610 | 1.00 | 0.00 | H |
| ATOM | 850 | HG3  | LYS | 53 | 28.478 | 43.199 | 48.635 | 1.00 | 0.00 | H |
| ATOM | 851 | CD   | LYS | 53 | 27.897 | 43.618 | 46.598 | 1.00 | 0.00 | C |
| ATOM | 852 | HD2  | LYS | 53 | 26.835 | 43.732 | 46.831 | 1.00 | 0.00 | H |
| ATOM | 853 | HD3  | LYS | 53 | 28.165 | 44.328 | 45.814 | 1.00 | 0.00 | H |
| ATOM | 854 | CE   | LYS | 53 | 28.157 | 42.188 | 46.109 | 1.00 | 0.00 | C |
| ATOM | 855 | HE2  | LYS | 53 | 29.229 | 42.062 | 45.934 | 1.00 | 0.00 | H |
| ATOM | 856 | HE3  | LYS | 53 | 27.858 | 41.489 | 46.896 | 1.00 | 0.00 | H |
| ATOM | 857 | NZ   | LYS | 53 | 27.402 | 41.892 | 44.868 | 1.00 | 0.00 | N |
| ATOM | 858 | HZ1  | LYS | 53 | 26.395 | 42.005 | 45.004 | 1.00 | 0.00 | H |
| ATOM | 859 | HZ2  | LYS | 53 | 27.538 | 40.924 | 44.580 | 1.00 | 0.00 | H |
| ATOM | 860 | HZ3  | LYS | 53 | 27.668 | 42.493 | 44.106 | 1.00 | 0.00 | H |
| ATOM | 861 | C    | LYS | 53 | 30.736 | 45.698 | 49.426 | 1.00 | 0.00 | C |
| ATOM | 862 | O    | LYS | 53 | 31.233 | 46.379 | 48.529 | 1.00 | 0.00 | O |
| ATOM | 863 | N    | LEU | 54 | 31.472 | 44.926 | 50.236 | 1.00 | 0.00 | N |
| ATOM | 864 | H    | LEU | 54 | 31.002 | 44.393 | 50.948 | 1.00 | 0.00 | H |
| ATOM | 865 | CA   | LEU | 54 | 32.902 | 44.675 | 49.996 | 1.00 | 0.00 | C |
| ATOM | 866 | HA   | LEU | 54 | 33.419 | 45.627 | 49.888 | 1.00 | 0.00 | H |
| ATOM | 867 | CB   | LEU | 54 | 33.570 | 43.912 | 51.155 | 1.00 | 0.00 | C |
| ATOM | 868 | HB2  | LEU | 54 | 33.141 | 42.910 | 51.210 | 1.00 | 0.00 | H |
| ATOM | 869 | HB3  | LEU | 54 | 34.621 | 43.805 | 50.880 | 1.00 | 0.00 | H |
| ATOM | 870 | CG   | LEU | 54 | 33.508 | 44.537 | 52.564 | 1.00 | 0.00 | C |
| ATOM | 871 | HG   | LEU | 54 | 32.513 | 44.386 | 52.984 | 1.00 | 0.00 | H |
| ATOM | 872 | CD1  | LEU | 54 | 34.542 | 43.856 | 53.460 | 1.00 | 0.00 | C |
| ATOM | 873 | HD11 | LEU | 54 | 34.287 | 42.807 | 53.589 | 1.00 | 0.00 | H |
| ATOM | 874 | HD12 | LEU | 54 | 34.573 | 44.341 | 54.434 | 1.00 | 0.00 | H |
| ATOM | 875 | HD13 | LEU | 54 | 35.531 | 43.959 | 53.019 | 1.00 | 0.00 | H |
| ATOM | 876 | CD2  | LEU | 54 | 33.826 | 46.025 | 52.586 | 1.00 | 0.00 | C |
| ATOM | 877 | HD21 | LEU | 54 | 34.801 | 46.218 | 52.135 | 1.00 | 0.00 | H |
| ATOM | 878 | HD22 | LEU | 54 | 33.050 | 46.554 | 52.050 | 1.00 | 0.00 | H |
| ATOM | 879 | HD23 | LEU | 54 | 33.821 | 46.395 | 53.611 | 1.00 | 0.00 | H |
| ATOM | 880 | C    | LEU | 54 | 33.072 | 43.914 | 48.674 | 1.00 | 0.00 | C |
| ATOM | 881 | O    | LEU | 54 | 32.399 | 42.902 | 48.456 | 1.00 | 0.00 | O |
| ATOM | 882 | N    | GLY | 55 | 33.942 | 44.415 | 47.797 | 1.00 | 0.00 | N |

|      |     |      |     |    |        |        |        |      |      |   |
|------|-----|------|-----|----|--------|--------|--------|------|------|---|
| ATOM | 883 | H    | GLY | 55 | 34.501 | 45.213 | 48.081 | 1.00 | 0.00 | H |
| ATOM | 884 | CA   | GLY | 55 | 34.090 | 43.920 | 46.426 | 1.00 | 0.00 | C |
| ATOM | 885 | HA2  | GLY | 55 | 33.306 | 43.199 | 46.189 | 1.00 | 0.00 | H |
| ATOM | 886 | HA3  | GLY | 55 | 33.984 | 44.763 | 45.743 | 1.00 | 0.00 | H |
| ATOM | 887 | C    | GLY | 55 | 35.438 | 43.263 | 46.143 | 1.00 | 0.00 | C |
| ATOM | 888 | O    | GLY | 55 | 35.485 | 42.265 | 45.430 | 1.00 | 0.00 | O |
| ATOM | 889 | N    | THR | 56 | 36.533 | 43.800 | 46.690 | 1.00 | 0.00 | N |
| ATOM | 890 | H    | THR | 56 | 36.438 | 44.581 | 47.331 | 1.00 | 0.00 | H |
| ATOM | 891 | CA   | THR | 56 | 37.897 | 43.303 | 46.437 | 1.00 | 0.00 | C |
| ATOM | 892 | HA   | THR | 56 | 37.850 | 42.223 | 46.297 | 1.00 | 0.00 | H |
| ATOM | 893 | CB   | THR | 56 | 38.515 | 43.905 | 45.157 | 1.00 | 0.00 | C |
| ATOM | 894 | HB   | THR | 56 | 39.512 | 43.482 | 45.042 | 1.00 | 0.00 | H |
| ATOM | 895 | CG2  | THR | 56 | 37.758 | 43.638 | 43.856 | 1.00 | 0.00 | C |
| ATOM | 896 | HG21 | THR | 56 | 38.340 | 44.016 | 43.016 | 1.00 | 0.00 | H |
| ATOM | 897 | HG22 | THR | 56 | 36.790 | 44.134 | 43.868 | 1.00 | 0.00 | H |
| ATOM | 898 | HG23 | THR | 56 | 37.617 | 42.564 | 43.730 | 1.00 | 0.00 | H |
| ATOM | 899 | OG1  | THR | 56 | 38.643 | 45.297 | 45.267 | 1.00 | 0.00 | O |
| ATOM | 900 | HG1  | THR | 56 | 37.762 | 45.687 | 45.295 | 1.00 | 0.00 | H |
| ATOM | 901 | C    | THR | 56 | 38.833 | 43.556 | 47.624 | 1.00 | 0.00 | C |
| ATOM | 902 | O    | THR | 56 | 38.551 | 44.379 | 48.498 | 1.00 | 0.00 | O |
| ATOM | 903 | N    | TYR | 57 | 39.955 | 42.832 | 47.639 | 1.00 | 0.00 | N |
| ATOM | 904 | H    | TYR | 57 | 40.159 | 42.241 | 46.847 | 1.00 | 0.00 | H |
| ATOM | 905 | CA   | TYR | 57 | 40.977 | 42.849 | 48.688 | 1.00 | 0.00 | C |
| ATOM | 906 | HA   | TYR | 57 | 40.895 | 43.776 | 49.256 | 1.00 | 0.00 | H |
| ATOM | 907 | CB   | TYR | 57 | 40.773 | 41.666 | 49.645 | 1.00 | 0.00 | C |
| ATOM | 908 | HB2  | TYR | 57 | 41.030 | 40.741 | 49.127 | 1.00 | 0.00 | H |
| ATOM | 909 | HB3  | TYR | 57 | 41.459 | 41.773 | 50.487 | 1.00 | 0.00 | H |
| ATOM | 910 | CG   | TYR | 57 | 39.358 | 41.551 | 50.172 | 1.00 | 0.00 | C |
| ATOM | 911 | CD1  | TYR | 57 | 38.421 | 40.735 | 49.508 | 1.00 | 0.00 | C |
| ATOM | 912 | HD1  | TYR | 57 | 38.720 | 40.168 | 48.638 | 1.00 | 0.00 | H |
| ATOM | 913 | CE1  | TYR | 57 | 37.089 | 40.683 | 49.960 | 1.00 | 0.00 | C |
| ATOM | 914 | HE1  | TYR | 57 | 36.359 | 40.069 | 49.457 | 1.00 | 0.00 | H |
| ATOM | 915 | CZ   | TYR | 57 | 36.705 | 41.431 | 51.090 | 1.00 | 0.00 | C |
| ATOM | 916 | OH   | TYR | 57 | 35.443 | 41.309 | 51.575 | 1.00 | 0.00 | O |
| ATOM | 917 | HH   | TYR | 57 | 35.416 | 41.630 | 52.479 | 1.00 | 0.00 | H |
| ATOM | 918 | CE2  | TYR | 57 | 37.649 | 42.243 | 51.760 | 1.00 | 0.00 | C |
| ATOM | 919 | HE2  | TYR | 57 | 37.374 | 42.791 | 52.646 | 1.00 | 0.00 | H |
| ATOM | 920 | CD2  | TYR | 57 | 38.971 | 42.309 | 51.292 | 1.00 | 0.00 | C |
| ATOM | 921 | HD2  | TYR | 57 | 39.696 | 42.937 | 51.795 | 1.00 | 0.00 | H |
| ATOM | 922 | C    | TYR | 57 | 42.366 | 42.788 | 48.049 | 1.00 | 0.00 | C |
| ATOM | 923 | O    | TYR | 57 | 42.529 | 42.189 | 46.986 | 1.00 | 0.00 | O |
| ATOM | 924 | N    | LEU | 58 | 43.363 | 43.400 | 48.686 | 1.00 | 0.00 | N |
| ATOM | 925 | H    | LEU | 58 | 43.145 | 43.870 | 49.563 | 1.00 | 0.00 | H |
| ATOM | 926 | CA   | LEU | 58 | 44.710 | 43.569 | 48.141 | 1.00 | 0.00 | C |
| ATOM | 927 | HA   | LEU | 58 | 44.944 | 42.714 | 47.504 | 1.00 | 0.00 | H |
| ATOM | 928 | CB   | LEU | 58 | 44.719 | 44.847 | 47.269 | 1.00 | 0.00 | C |
| ATOM | 929 | HB2  | LEU | 58 | 43.869 | 44.824 | 46.588 | 1.00 | 0.00 | H |
| ATOM | 930 | HB3  | LEU | 58 | 44.595 | 45.712 | 47.923 | 1.00 | 0.00 | H |
| ATOM | 931 | CG   | LEU | 58 | 46.015 | 45.000 | 46.453 | 1.00 | 0.00 | C |
| ATOM | 932 | HG   | LEU | 58 | 46.830 | 44.606 | 47.041 | 1.00 | 0.00 | H |
| ATOM | 933 | CD1  | LEU | 58 | 45.971 | 44.215 | 45.139 | 1.00 | 0.00 | C |
| ATOM | 934 | HD11 | LEU | 58 | 45.624 | 43.199 | 45.323 | 1.00 | 0.00 | H |

|      |     |          |    |        |        |        |      |      |   |
|------|-----|----------|----|--------|--------|--------|------|------|---|
| ATOM | 935 | HD12 LEU | 58 | 46.968 | 44.184 | 44.701 | 1.00 | 0.00 | H |
| ATOM | 936 | HD13 LEU | 58 | 45.298 | 44.670 | 44.424 | 1.00 | 0.00 | H |
| ATOM | 937 | CD2 LEU  | 58 | 46.352 | 46.465 | 46.169 | 1.00 | 0.00 | C |
| ATOM | 938 | HD21 LEU | 58 | 45.533 | 46.957 | 45.654 | 1.00 | 0.00 | H |
| ATOM | 939 | HD22 LEU | 58 | 46.524 | 46.984 | 47.113 | 1.00 | 0.00 | H |
| ATOM | 940 | HD23 LEU | 58 | 47.248 | 46.526 | 45.553 | 1.00 | 0.00 | H |
| ATOM | 941 | C LEU    | 58 | 45.736 | 43.595 | 49.286 | 1.00 | 0.00 | C |
| ATOM | 942 | O LEU    | 58 | 46.184 | 44.654 | 49.725 | 1.00 | 0.00 | O |
| ATOM | 943 | N GLY    | 59 | 46.085 | 42.420 | 49.811 | 1.00 | 0.00 | N |
| ATOM | 944 | H GLY    | 59 | 45.649 | 41.584 | 49.453 | 1.00 | 0.00 | H |
| ATOM | 945 | CA GLY   | 59 | 46.894 | 42.315 | 51.028 | 1.00 | 0.00 | C |
| ATOM | 946 | HA2 GLY  | 59 | 47.160 | 41.276 | 51.210 | 1.00 | 0.00 | H |
| ATOM | 947 | HA3 GLY  | 59 | 47.807 | 42.894 | 50.907 | 1.00 | 0.00 | H |
| ATOM | 948 | C GLY    | 59 | 46.143 | 42.843 | 52.245 | 1.00 | 0.00 | C |
| ATOM | 949 | O GLY    | 59 | 45.031 | 42.402 | 52.515 | 1.00 | 0.00 | O |
| ATOM | 950 | N ASP    | 60 | 46.727 | 43.814 | 52.951 | 1.00 | 0.00 | N |
| ATOM | 951 | H ASP    | 60 | 47.630 | 44.162 | 52.671 | 1.00 | 0.00 | H |
| ATOM | 952 | CA ASP   | 60 | 46.039 | 44.539 | 54.028 | 1.00 | 0.00 | C |
| ATOM | 953 | HA ASP   | 60 | 45.507 | 43.811 | 54.641 | 1.00 | 0.00 | H |
| ATOM | 954 | CB ASP   | 60 | 47.063 | 45.251 | 54.925 | 1.00 | 0.00 | C |
| ATOM | 955 | HB2 ASP  | 60 | 46.581 | 45.463 | 55.880 | 1.00 | 0.00 | H |
| ATOM | 956 | HB3 ASP  | 60 | 47.899 | 44.580 | 55.127 | 1.00 | 0.00 | H |
| ATOM | 957 | CG ASP   | 60 | 47.600 | 46.567 | 54.352 | 1.00 | 0.00 | C |
| ATOM | 958 | OD1 ASP  | 60 | 47.907 | 46.678 | 53.126 | 1.00 | 0.00 | O |
| ATOM | 959 | OD2 ASP  | 60 | 47.766 | 47.528 | 55.150 | 1.00 | 0.00 | O |
| ATOM | 960 | C ASP    | 60 | 44.987 | 45.550 | 53.528 | 1.00 | 0.00 | C |
| ATOM | 961 | O ASP    | 60 | 44.305 | 46.164 | 54.345 | 1.00 | 0.00 | O |
| ATOM | 962 | N GLY    | 61 | 44.880 | 45.763 | 52.211 | 1.00 | 0.00 | N |
| ATOM | 963 | H GLY    | 61 | 45.477 | 45.235 | 51.590 | 1.00 | 0.00 | H |
| ATOM | 964 | CA GLY   | 61 | 43.926 | 46.687 | 51.607 | 1.00 | 0.00 | C |
| ATOM | 965 | HA2 GLY  | 61 | 43.818 | 47.545 | 52.263 | 1.00 | 0.00 | H |
| ATOM | 966 | HA3 GLY  | 61 | 44.318 | 47.044 | 50.656 | 1.00 | 0.00 | H |
| ATOM | 967 | C GLY    | 61 | 42.551 | 46.059 | 51.355 | 1.00 | 0.00 | C |
| ATOM | 968 | O GLY    | 61 | 42.460 | 44.913 | 50.909 | 1.00 | 0.00 | O |
| ATOM | 969 | N ALA    | 62 | 41.481 | 46.827 | 51.560 | 1.00 | 0.00 | N |
| ATOM | 970 | H ALA    | 62 | 41.634 | 47.754 | 51.950 | 1.00 | 0.00 | H |
| ATOM | 971 | CA ALA   | 62 | 40.102 | 46.441 | 51.256 | 1.00 | 0.00 | C |
| ATOM | 972 | HA ALA   | 62 | 40.118 | 45.566 | 50.604 | 1.00 | 0.00 | H |
| ATOM | 973 | CB ALA   | 62 | 39.395 | 46.029 | 52.553 | 1.00 | 0.00 | C |
| ATOM | 974 | HB1 ALA  | 62 | 39.941 | 45.213 | 53.029 | 1.00 | 0.00 | H |
| ATOM | 975 | HB2 ALA  | 62 | 38.379 | 45.700 | 52.333 | 1.00 | 0.00 | H |
| ATOM | 976 | HB3 ALA  | 62 | 39.356 | 46.875 | 53.240 | 1.00 | 0.00 | H |
| ATOM | 977 | C ALA    | 62 | 39.348 | 47.549 | 50.498 | 1.00 | 0.00 | C |
| ATOM | 978 | O ALA    | 62 | 39.549 | 48.743 | 50.736 | 1.00 | 0.00 | O |
| ATOM | 979 | N MET    | 63 | 38.462 | 47.136 | 49.586 | 1.00 | 0.00 | N |
| ATOM | 980 | H MET    | 63 | 38.365 | 46.137 | 49.432 | 1.00 | 0.00 | H |
| ATOM | 981 | CA MET   | 63 | 37.668 | 48.013 | 48.720 | 1.00 | 0.00 | C |
| ATOM | 982 | HA MET   | 63 | 37.696 | 49.026 | 49.124 | 1.00 | 0.00 | H |
| ATOM | 983 | CB MET   | 63 | 38.314 | 48.059 | 47.322 | 1.00 | 0.00 | C |
| ATOM | 984 | HB2 MET  | 63 | 39.201 | 48.688 | 47.392 | 1.00 | 0.00 | H |
| ATOM | 985 | HB3 MET  | 63 | 38.650 | 47.060 | 47.056 | 1.00 | 0.00 | H |
| ATOM | 986 | CG MET   | 63 | 37.431 | 48.597 | 46.182 | 1.00 | 0.00 | C |

|      |      |          |    |        |        |        |      |      |   |
|------|------|----------|----|--------|--------|--------|------|------|---|
| ATOM | 987  | HG2 MET  | 63 | 36.897 | 49.482 | 46.526 | 1.00 | 0.00 | H |
| ATOM | 988  | HG3 MET  | 63 | 38.092 | 48.912 | 45.375 | 1.00 | 0.00 | H |
| ATOM | 989  | SD MET   | 63 | 36.240 | 47.410 | 45.476 | 1.00 | 0.00 | S |
| ATOM | 990  | CE MET   | 63 | 35.485 | 48.456 | 44.201 | 1.00 | 0.00 | C |
| ATOM | 991  | HE1 MET  | 63 | 34.686 | 47.907 | 43.703 | 1.00 | 0.00 | H |
| ATOM | 992  | HE2 MET  | 63 | 35.074 | 49.356 | 44.661 | 1.00 | 0.00 | H |
| ATOM | 993  | HE3 MET  | 63 | 36.237 | 48.735 | 43.463 | 1.00 | 0.00 | H |
| ATOM | 994  | C MET    | 63 | 36.195 | 47.586 | 48.701 | 1.00 | 0.00 | C |
| ATOM | 995  | O MET    | 63 | 35.859 | 46.396 | 48.717 | 1.00 | 0.00 | O |
| ATOM | 996  | N CYS    | 64 | 35.303 | 48.574 | 48.639 | 1.00 | 0.00 | N |
| ATOM | 997  | H CYS    | 64 | 35.640 | 49.524 | 48.561 | 1.00 | 0.00 | H |
| ATOM | 998  | CA CYS   | 64 | 33.856 | 48.377 | 48.638 | 1.00 | 0.00 | C |
| ATOM | 999  | HA CYS   | 64 | 33.645 | 47.405 | 48.193 | 1.00 | 0.00 | H |
| ATOM | 1000 | CB CYS   | 64 | 33.344 | 48.352 | 50.092 | 1.00 | 0.00 | C |
| ATOM | 1001 | HB2 CYS  | 64 | 32.577 | 47.590 | 50.176 | 1.00 | 0.00 | H |
| ATOM | 1002 | HB3 CYS  | 64 | 34.163 | 48.097 | 50.763 | 1.00 | 0.00 | H |
| ATOM | 1003 | SG CYS   | 64 | 32.582 | 49.904 | 50.628 | 1.00 | 0.00 | S |
| ATOM | 1004 | HG CYS   | 64 | 32.416 | 49.608 | 51.924 | 1.00 | 0.00 | H |
| ATOM | 1005 | C CYS    | 64 | 33.124 | 49.408 | 47.775 | 1.00 | 0.00 | C |
| ATOM | 1006 | O CYS    | 64 | 33.697 | 50.428 | 47.377 | 1.00 | 0.00 | O |
| ATOM | 1007 | N ILE    | 65 | 31.840 | 49.134 | 47.532 | 1.00 | 0.00 | N |
| ATOM | 1008 | H ILE    | 65 | 31.455 | 48.278 | 47.916 | 1.00 | 0.00 | H |
| ATOM | 1009 | CA ILE   | 65 | 30.902 | 50.063 | 46.901 | 1.00 | 0.00 | C |
| ATOM | 1010 | HA ILE   | 65 | 31.414 | 51.016 | 46.770 | 1.00 | 0.00 | H |
| ATOM | 1011 | CB ILE   | 65 | 30.489 | 49.586 | 45.484 | 1.00 | 0.00 | C |
| ATOM | 1012 | HB ILE   | 65 | 30.031 | 50.444 | 44.988 | 1.00 | 0.00 | H |
| ATOM | 1013 | CG2 ILE  | 65 | 31.724 | 49.184 | 44.658 | 1.00 | 0.00 | C |
| ATOM | 1014 | HG21 ILE | 65 | 32.523 | 49.907 | 44.808 | 1.00 | 0.00 | H |
| ATOM | 1015 | HG22 ILE | 65 | 31.465 | 49.167 | 43.603 | 1.00 | 0.00 | H |
| ATOM | 1016 | HG23 ILE | 65 | 32.083 | 48.199 | 44.961 | 1.00 | 0.00 | H |
| ATOM | 1017 | CG1 ILE  | 65 | 29.439 | 48.447 | 45.490 | 1.00 | 0.00 | C |
| ATOM | 1018 | HG12 ILE | 65 | 29.848 | 47.582 | 46.015 | 1.00 | 0.00 | H |
| ATOM | 1019 | HG13 ILE | 65 | 28.549 | 48.780 | 46.023 | 1.00 | 0.00 | H |
| ATOM | 1020 | CD1 ILE  | 65 | 28.977 | 48.005 | 44.094 | 1.00 | 0.00 | C |
| ATOM | 1021 | HD11 ILE | 65 | 28.624 | 48.869 | 43.529 | 1.00 | 0.00 | H |
| ATOM | 1022 | HD12 ILE | 65 | 28.159 | 47.292 | 44.196 | 1.00 | 0.00 | H |
| ATOM | 1023 | HD13 ILE | 65 | 29.792 | 47.523 | 43.555 | 1.00 | 0.00 | H |
| ATOM | 1024 | C ILE    | 65 | 29.687 | 50.336 | 47.800 | 1.00 | 0.00 | C |
| ATOM | 1025 | O ILE    | 65 | 29.189 | 49.444 | 48.492 | 1.00 | 0.00 | O |
| ATOM | 1026 | N TRP    | 66 | 29.162 | 51.554 | 47.686 | 1.00 | 0.00 | N |
| ATOM | 1027 | H TRP    | 66 | 29.704 | 52.225 | 47.151 | 1.00 | 0.00 | H |
| ATOM | 1028 | CA TRP   | 66 | 27.759 | 51.912 | 47.908 | 1.00 | 0.00 | C |
| ATOM | 1029 | HA TRP   | 66 | 27.185 | 51.020 | 48.165 | 1.00 | 0.00 | H |
| ATOM | 1030 | CB TRP   | 66 | 27.617 | 52.935 | 49.048 | 1.00 | 0.00 | C |
| ATOM | 1031 | HB2 TRP  | 66 | 28.099 | 53.861 | 48.742 | 1.00 | 0.00 | H |
| ATOM | 1032 | HB3 TRP  | 66 | 26.558 | 53.162 | 49.176 | 1.00 | 0.00 | H |
| ATOM | 1033 | CG TRP   | 66 | 28.165 | 52.558 | 50.389 | 1.00 | 0.00 | C |
| ATOM | 1034 | CD1 TRP  | 66 | 27.436 | 52.078 | 51.420 | 1.00 | 0.00 | C |
| ATOM | 1035 | HD1 TRP  | 66 | 26.369 | 51.892 | 51.392 | 1.00 | 0.00 | H |
| ATOM | 1036 | NE1 TRP  | 66 | 28.255 | 51.855 | 52.508 | 1.00 | 0.00 | N |
| ATOM | 1037 | HE1 TRP  | 66 | 27.901 | 51.517 | 53.397 | 1.00 | 0.00 | H |
| ATOM | 1038 | CE2 TRP  | 66 | 29.566 | 52.178 | 52.230 | 1.00 | 0.00 | C |

|      |      |         |    |        |        |        |      |      |   |
|------|------|---------|----|--------|--------|--------|------|------|---|
| ATOM | 1039 | CZ2 TRP | 66 | 30.746 | 52.141 | 52.986 | 1.00 | 0.00 | C |
| ATOM | 1040 | HZ2 TRP | 66 | 30.736 | 51.749 | 53.992 | 1.00 | 0.00 | H |
| ATOM | 1041 | CH2 TRP | 66 | 31.938 | 52.628 | 52.423 | 1.00 | 0.00 | C |
| ATOM | 1042 | HH2 TRP | 66 | 32.850 | 52.623 | 53.006 | 1.00 | 0.00 | H |
| ATOM | 1043 | CZ3 TRP | 66 | 31.947 | 53.092 | 51.095 | 1.00 | 0.00 | C |
| ATOM | 1044 | HZ3 TRP | 66 | 32.871 | 53.432 | 50.647 | 1.00 | 0.00 | H |
| ATOM | 1045 | CE3 TRP | 66 | 30.763 | 53.089 | 50.332 | 1.00 | 0.00 | C |
| ATOM | 1046 | HE3 TRP | 66 | 30.784 | 53.428 | 49.308 | 1.00 | 0.00 | H |
| ATOM | 1047 | CD2 TRP | 66 | 29.539 | 52.646 | 50.881 | 1.00 | 0.00 | C |
| ATOM | 1048 | C TRP   | 66 | 27.188 | 52.505 | 46.610 | 1.00 | 0.00 | C |
| ATOM | 1049 | O TRP   | 66 | 27.939 | 52.867 | 45.704 | 1.00 | 0.00 | O |
| ATOM | 1050 | N GLU   | 67 | 25.871 | 52.686 | 46.526 | 1.00 | 0.00 | N |
| ATOM | 1051 | H GLU   | 67 | 25.285 | 52.384 | 47.288 | 1.00 | 0.00 | H |
| ATOM | 1052 | CA GLU  | 67 | 25.270 | 53.520 | 45.473 | 1.00 | 0.00 | C |
| ATOM | 1053 | HA GLU  | 67 | 25.613 | 53.157 | 44.501 | 1.00 | 0.00 | H |
| ATOM | 1054 | CB GLU  | 67 | 23.730 | 53.423 | 45.507 | 1.00 | 0.00 | C |
| ATOM | 1055 | HB2 GLU | 67 | 23.368 | 54.110 | 46.274 | 1.00 | 0.00 | H |
| ATOM | 1056 | HB3 GLU | 67 | 23.344 | 53.778 | 44.551 | 1.00 | 0.00 | H |
| ATOM | 1057 | CG GLU  | 67 | 23.107 | 52.044 | 45.815 | 1.00 | 0.00 | C |
| ATOM | 1058 | HG2 GLU | 67 | 23.374 | 51.762 | 46.836 | 1.00 | 0.00 | H |
| ATOM | 1059 | HG3 GLU | 67 | 22.022 | 52.161 | 45.796 | 1.00 | 0.00 | H |
| ATOM | 1060 | CD GLU  | 67 | 23.482 | 50.887 | 44.872 | 1.00 | 0.00 | C |
| ATOM | 1061 | OE1 GLU | 67 | 24.258 | 51.067 | 43.909 | 1.00 | 0.00 | O |
| ATOM | 1062 | OE2 GLU | 67 | 22.975 | 49.758 | 45.098 | 1.00 | 0.00 | O |
| ATOM | 1063 | C GLU   | 67 | 25.718 | 54.995 | 45.635 | 1.00 | 0.00 | C |
| ATOM | 1064 | O GLU   | 67 | 25.997 | 55.440 | 46.755 | 1.00 | 0.00 | O |
| ATOM | 1065 | N ALA   | 68 | 25.767 | 55.797 | 44.562 | 1.00 | 0.00 | N |
| ATOM | 1066 | H ALA   | 68 | 25.605 | 55.414 | 43.635 | 1.00 | 0.00 | H |
| ATOM | 1067 | CA ALA  | 68 | 26.147 | 57.217 | 44.676 | 1.00 | 0.00 | C |
| ATOM | 1068 | HA ALA  | 68 | 27.134 | 57.276 | 45.137 | 1.00 | 0.00 | H |
| ATOM | 1069 | CB ALA  | 68 | 26.250 | 57.855 | 43.293 | 1.00 | 0.00 | C |
| ATOM | 1070 | HB1 ALA | 68 | 26.379 | 58.934 | 43.396 | 1.00 | 0.00 | H |
| ATOM | 1071 | HB2 ALA | 68 | 25.346 | 57.655 | 42.717 | 1.00 | 0.00 | H |
| ATOM | 1072 | HB3 ALA | 68 | 27.127 | 57.463 | 42.787 | 1.00 | 0.00 | H |
| ATOM | 1073 | C ALA   | 68 | 25.198 | 58.039 | 45.567 | 1.00 | 0.00 | C |
| ATOM | 1074 | O ALA   | 68 | 25.652 | 58.930 | 46.274 | 1.00 | 0.00 | O |
| ATOM | 1075 | N SER   | 69 | 23.901 | 57.717 | 45.618 | 1.00 | 0.00 | N |
| ATOM | 1076 | H SER   | 69 | 23.535 | 57.038 | 44.967 | 1.00 | 0.00 | H |
| ATOM | 1077 | CA SER  | 69 | 22.950 | 58.377 | 46.532 | 1.00 | 0.00 | C |
| ATOM | 1078 | HA SER  | 69 | 22.978 | 59.450 | 46.344 | 1.00 | 0.00 | H |
| ATOM | 1079 | CB SER  | 69 | 21.524 | 57.886 | 46.258 | 1.00 | 0.00 | C |
| ATOM | 1080 | HB2 SER | 69 | 21.446 | 56.822 | 46.490 | 1.00 | 0.00 | H |
| ATOM | 1081 | HB3 SER | 69 | 20.829 | 58.437 | 46.893 | 1.00 | 0.00 | H |
| ATOM | 1082 | OG SER  | 69 | 21.181 | 58.096 | 44.905 | 1.00 | 0.00 | O |
| ATOM | 1083 | HG SER  | 69 | 20.208 | 58.221 | 44.870 | 1.00 | 0.00 | H |
| ATOM | 1084 | C SER   | 69 | 23.266 | 58.162 | 48.023 | 1.00 | 0.00 | C |
| ATOM | 1085 | O SER   | 69 | 22.678 | 58.827 | 48.879 | 1.00 | 0.00 | O |
| ATOM | 1086 | N HID   | 70 | 24.171 | 57.233 | 48.355 | 1.00 | 0.00 | N |
| ATOM | 1087 | H HID   | 70 | 24.648 | 56.750 | 47.601 | 1.00 | 0.00 | H |
| ATOM | 1088 | CA HID  | 70 | 24.516 | 56.811 | 49.715 | 1.00 | 0.00 | C |
| ATOM | 1089 | HA HID  | 70 | 23.839 | 57.313 | 50.406 | 1.00 | 0.00 | H |
| ATOM | 1090 | CB HID  | 70 | 24.246 | 55.295 | 49.866 | 1.00 | 0.00 | C |



|      |      |      |     |    |        |        |        |      |      |   |
|------|------|------|-----|----|--------|--------|--------|------|------|---|
| ATOM | 1091 | HB2  | HID | 70 | 24.391 | 54.797 | 48.907 | 1.00 | 0.00 | H |
| ATOM | 1092 | HB3  | HID | 70 | 24.962 | 54.853 | 50.554 | 1.00 | 0.00 | H |
| ATOM | 1093 | CG   | HID | 70 | 22.862 | 54.960 | 50.386 | 1.00 | 0.00 | C |
| ATOM | 1094 | ND1  | HID | 70 | 22.504 | 53.792 | 51.024 | 1.00 | 0.00 | N |
| ATOM | 1095 | HD1  | HID | 70 | 23.114 | 53.010 | 51.257 | 1.00 | 0.00 | H |
| ATOM | 1096 | CE1  | HID | 70 | 21.226 | 53.897 | 51.419 | 1.00 | 0.00 | C |
| ATOM | 1097 | HE1  | HID | 70 | 20.688 | 53.141 | 51.979 | 1.00 | 0.00 | H |
| ATOM | 1098 | NE2  | HID | 70 | 20.718 | 55.084 | 51.054 | 1.00 | 0.00 | N |
| ATOM | 1099 | CD2  | HID | 70 | 21.742 | 55.753 | 50.374 | 1.00 | 0.00 | C |
| ATOM | 1100 | HD2  | HID | 70 | 21.666 | 56.746 | 49.958 | 1.00 | 0.00 | H |
| ATOM | 1101 | C    | HID | 70 | 25.903 | 57.296 | 50.191 | 1.00 | 0.00 | C |
| ATOM | 1102 | O    | HID | 70 | 26.496 | 56.693 | 51.087 | 1.00 | 0.00 | O |
| ATOM | 1103 | N    | VAL | 71 | 26.381 | 58.454 | 49.707 | 1.00 | 0.00 | N |
| ATOM | 1104 | H    | VAL | 71 | 25.933 | 58.857 | 48.891 | 1.00 | 0.00 | H |
| ATOM | 1105 | CA   | VAL | 71 | 27.591 | 59.123 | 50.248 | 1.00 | 0.00 | C |
| ATOM | 1106 | HA   | VAL | 71 | 28.449 | 58.497 | 50.013 | 1.00 | 0.00 | H |
| ATOM | 1107 | CB   | VAL | 71 | 27.827 | 60.518 | 49.626 | 1.00 | 0.00 | C |
| ATOM | 1108 | HB   | VAL | 71 | 27.135 | 61.228 | 50.083 | 1.00 | 0.00 | H |
| ATOM | 1109 | CG1  | VAL | 71 | 29.253 | 60.999 | 49.901 | 1.00 | 0.00 | C |
| ATOM | 1110 | HG11 | VAL | 71 | 29.454 | 61.032 | 50.970 | 1.00 | 0.00 | H |
| ATOM | 1111 | HG12 | VAL | 71 | 29.975 | 60.339 | 49.418 | 1.00 | 0.00 | H |
| ATOM | 1112 | HG13 | VAL | 71 | 29.365 | 62.007 | 49.508 | 1.00 | 0.00 | H |
| ATOM | 1113 | CG2  | VAL | 71 | 27.604 | 60.581 | 48.115 | 1.00 | 0.00 | C |
| ATOM | 1114 | HG21 | VAL | 71 | 27.968 | 61.527 | 47.715 | 1.00 | 0.00 | H |
| ATOM | 1115 | HG22 | VAL | 71 | 26.538 | 60.532 | 47.907 | 1.00 | 0.00 | H |
| ATOM | 1116 | HG23 | VAL | 71 | 28.120 | 59.757 | 47.618 | 1.00 | 0.00 | H |
| ATOM | 1117 | C    | VAL | 71 | 27.528 | 59.283 | 51.777 | 1.00 | 0.00 | C |
| ATOM | 1118 | O    | VAL | 71 | 28.512 | 59.050 | 52.475 | 1.00 | 0.00 | O |
| ATOM | 1119 | N    | ARG | 72 | 26.339 | 59.593 | 52.317 | 1.00 | 0.00 | N |
| ATOM | 1120 | H    | ARG | 72 | 25.578 | 59.760 | 51.675 | 1.00 | 0.00 | H |
| ATOM | 1121 | CA   | ARG | 72 | 26.075 | 59.669 | 53.767 | 1.00 | 0.00 | C |
| ATOM | 1122 | HA   | ARG | 72 | 26.757 | 60.403 | 54.200 | 1.00 | 0.00 | H |
| ATOM | 1123 | CB   | ARG | 72 | 24.622 | 60.144 | 54.011 | 1.00 | 0.00 | C |
| ATOM | 1124 | HB2  | ARG | 72 | 24.517 | 60.420 | 55.060 | 1.00 | 0.00 | H |
| ATOM | 1125 | HB3  | ARG | 72 | 24.421 | 61.026 | 53.400 | 1.00 | 0.00 | H |
| ATOM | 1126 | CG   | ARG | 72 | 23.595 | 59.048 | 53.691 | 1.00 | 0.00 | C |
| ATOM | 1127 | HG2  | ARG | 72 | 23.831 | 58.620 | 52.716 | 1.00 | 0.00 | H |
| ATOM | 1128 | HG3  | ARG | 72 | 23.685 | 58.280 | 54.459 | 1.00 | 0.00 | H |
| ATOM | 1129 | CD   | ARG | 72 | 22.125 | 59.456 | 53.669 | 1.00 | 0.00 | C |
| ATOM | 1130 | HD2  | ARG | 72 | 21.834 | 59.818 | 54.657 | 1.00 | 0.00 | H |
| ATOM | 1131 | HD3  | ARG | 72 | 21.982 | 60.248 | 52.931 | 1.00 | 0.00 | H |
| ATOM | 1132 | NE   | ARG | 72 | 21.312 | 58.281 | 53.299 | 1.00 | 0.00 | N |
| ATOM | 1133 | HE   | ARG | 72 | 21.806 | 57.402 | 53.163 | 1.00 | 0.00 | H |
| ATOM | 1134 | CZ   | ARG | 72 | 20.013 | 58.266 | 53.068 | 1.00 | 0.00 | C |
| ATOM | 1135 | NH1  | ARG | 72 | 19.268 | 59.310 | 53.293 | 1.00 | 0.00 | N |
| ATOM | 1136 | HH11 | ARG | 72 | 19.691 | 60.157 | 53.612 | 1.00 | 0.00 | H |
| ATOM | 1137 | HH12 | ARG | 72 | 18.283 | 59.292 | 53.085 | 1.00 | 0.00 | H |
| ATOM | 1138 | NH2  | ARG | 72 | 19.431 | 57.206 | 52.595 | 1.00 | 0.00 | N |
| ATOM | 1139 | HH21 | ARG | 72 | 19.985 | 56.416 | 52.276 | 1.00 | 0.00 | H |
| ATOM | 1140 | HH22 | ARG | 72 | 18.491 | 57.290 | 52.242 | 1.00 | 0.00 | H |
| ATOM | 1141 | C    | ARG | 72 | 26.379 | 58.353 | 54.498 | 1.00 | 0.00 | C |
| ATOM | 1142 | O    | ARG | 72 | 26.958 | 58.377 | 55.577 | 1.00 | 0.00 | O |

|      |      |      |     |    |        |        |        |      |      |   |
|------|------|------|-----|----|--------|--------|--------|------|------|---|
| ATOM | 1143 | N    | ASN | 73 | 26.014 | 57.212 | 53.907 | 1.00 | 0.00 | N |
| ATOM | 1144 | H    | ASN | 73 | 25.605 | 57.259 | 52.986 | 1.00 | 0.00 | H |
| ATOM | 1145 | CA   | ASN | 73 | 26.229 | 55.884 | 54.475 | 1.00 | 0.00 | C |
| ATOM | 1146 | HA   | ASN | 73 | 25.965 | 55.905 | 55.534 | 1.00 | 0.00 | H |
| ATOM | 1147 | CB   | ASN | 73 | 25.321 | 54.852 | 53.778 | 1.00 | 0.00 | C |
| ATOM | 1148 | HB2  | ASN | 73 | 25.568 | 54.795 | 52.720 | 1.00 | 0.00 | H |
| ATOM | 1149 | HB3  | ASN | 73 | 25.518 | 53.873 | 54.213 | 1.00 | 0.00 | H |
| ATOM | 1150 | CG   | ASN | 73 | 23.836 | 55.158 | 53.915 | 1.00 | 0.00 | C |
| ATOM | 1151 | OD1  | ASN | 73 | 23.305 | 56.085 | 53.318 | 1.00 | 0.00 | O |
| ATOM | 1152 | ND2  | ASN | 73 | 23.128 | 54.417 | 54.730 | 1.00 | 0.00 | N |
| ATOM | 1153 | HD21 | ASN | 73 | 23.519 | 53.617 | 55.212 | 1.00 | 0.00 | H |
| ATOM | 1154 | HD22 | ASN | 73 | 22.151 | 54.632 | 54.885 | 1.00 | 0.00 | H |
| ATOM | 1155 | C    | ASN | 73 | 27.710 | 55.502 | 54.387 | 1.00 | 0.00 | C |
| ATOM | 1156 | O    | ASN | 73 | 28.247 | 54.960 | 55.345 | 1.00 | 0.00 | O |
| ATOM | 1157 | N    | SER | 74 | 28.385 | 55.870 | 53.293 | 1.00 | 0.00 | N |
| ATOM | 1158 | H    | SER | 74 | 27.861 | 56.285 | 52.531 | 1.00 | 0.00 | H |
| ATOM | 1159 | CA   | SER | 74 | 29.836 | 55.716 | 53.136 | 1.00 | 0.00 | C |
| ATOM | 1160 | HA   | SER | 74 | 30.086 | 54.664 | 53.245 | 1.00 | 0.00 | H |
| ATOM | 1161 | CB   | SER | 74 | 30.226 | 56.165 | 51.726 | 1.00 | 0.00 | C |
| ATOM | 1162 | HB2  | SER | 74 | 29.648 | 55.604 | 50.991 | 1.00 | 0.00 | H |
| ATOM | 1163 | HB3  | SER | 74 | 30.007 | 57.225 | 51.604 | 1.00 | 0.00 | H |
| ATOM | 1164 | OG   | SER | 74 | 31.598 | 55.958 | 51.500 | 1.00 | 0.00 | O |
| ATOM | 1165 | HG   | SER | 74 | 31.747 | 55.001 | 51.489 | 1.00 | 0.00 | H |
| ATOM | 1166 | C    | SER | 74 | 30.630 | 56.487 | 54.200 | 1.00 | 0.00 | C |
| ATOM | 1167 | O    | SER | 74 | 31.481 | 55.914 | 54.881 | 1.00 | 0.00 | O |
| ATOM | 1168 | N    | ILE | 75 | 30.294 | 57.764 | 54.413 | 1.00 | 0.00 | N |
| ATOM | 1169 | H    | ILE | 75 | 29.603 | 58.182 | 53.799 | 1.00 | 0.00 | H |
| ATOM | 1170 | CA   | ILE | 75 | 30.925 | 58.621 | 55.428 | 1.00 | 0.00 | C |
| ATOM | 1171 | HA   | ILE | 75 | 32.007 | 58.538 | 55.319 | 1.00 | 0.00 | H |
| ATOM | 1172 | CB   | ILE | 75 | 30.537 | 60.096 | 55.170 | 1.00 | 0.00 | C |
| ATOM | 1173 | HB   | ILE | 75 | 29.468 | 60.143 | 54.951 | 1.00 | 0.00 | H |
| ATOM | 1174 | CG2  | ILE | 75 | 30.799 | 60.994 | 56.393 | 1.00 | 0.00 | C |
| ATOM | 1175 | HG21 | ILE | 75 | 30.157 | 60.704 | 57.225 | 1.00 | 0.00 | H |
| ATOM | 1176 | HG22 | ILE | 75 | 30.574 | 62.033 | 56.161 | 1.00 | 0.00 | H |
| ATOM | 1177 | HG23 | ILE | 75 | 31.841 | 60.906 | 56.702 | 1.00 | 0.00 | H |
| ATOM | 1178 | CG1  | ILE | 75 | 31.325 | 60.592 | 53.932 | 1.00 | 0.00 | C |
| ATOM | 1179 | HG12 | ILE | 75 | 32.389 | 60.631 | 54.170 | 1.00 | 0.00 | H |
| ATOM | 1180 | HG13 | ILE | 75 | 31.194 | 59.881 | 53.115 | 1.00 | 0.00 | H |
| ATOM | 1181 | CD1  | ILE | 75 | 30.888 | 61.962 | 53.407 | 1.00 | 0.00 | C |
| ATOM | 1182 | HD11 | ILE | 75 | 29.810 | 61.970 | 53.258 | 1.00 | 0.00 | H |
| ATOM | 1183 | HD12 | ILE | 75 | 31.381 | 62.155 | 52.454 | 1.00 | 0.00 | H |
| ATOM | 1184 | HD13 | ILE | 75 | 31.171 | 62.747 | 54.106 | 1.00 | 0.00 | H |
| ATOM | 1185 | C    | ILE | 75 | 30.612 | 58.141 | 56.854 | 1.00 | 0.00 | C |
| ATOM | 1186 | O    | ILE | 75 | 31.538 | 58.021 | 57.659 | 1.00 | 0.00 | O |
| ATOM | 1187 | N    | ASN | 76 | 29.353 | 57.789 | 57.159 | 1.00 | 0.00 | N |
| ATOM | 1188 | H    | ASN | 76 | 28.619 | 57.952 | 56.479 | 1.00 | 0.00 | H |
| ATOM | 1189 | CA   | ASN | 76 | 28.998 | 57.137 | 58.427 | 1.00 | 0.00 | C |
| ATOM | 1190 | HA   | ASN | 76 | 29.219 | 57.811 | 59.258 | 1.00 | 0.00 | H |
| ATOM | 1191 | CB   | ASN | 76 | 27.500 | 56.757 | 58.450 | 1.00 | 0.00 | C |
| ATOM | 1192 | HB2  | ASN | 76 | 27.165 | 56.504 | 57.447 | 1.00 | 0.00 | H |
| ATOM | 1193 | HB3  | ASN | 76 | 27.381 | 55.862 | 59.062 | 1.00 | 0.00 | H |
| ATOM | 1194 | CG   | ASN | 76 | 26.560 | 57.793 | 59.047 | 1.00 | 0.00 | C |

|      |      |          |    |        |        |        |      |      |   |
|------|------|----------|----|--------|--------|--------|------|------|---|
| ATOM | 1195 | OD1 ASN  | 76 | 26.938 | 58.833 | 59.562 | 1.00 | 0.00 | O |
| ATOM | 1196 | ND2 ASN  | 76 | 25.281 | 57.490 | 59.067 | 1.00 | 0.00 | N |
| ATOM | 1197 | HD21 ASN | 76 | 24.966 | 56.609 | 58.710 | 1.00 | 0.00 | H |
| ATOM | 1198 | HD22 ASN | 76 | 24.661 | 58.100 | 59.585 | 1.00 | 0.00 | H |
| ATOM | 1199 | C ASN    | 76 | 29.842 | 55.872 | 58.643 | 1.00 | 0.00 | C |
| ATOM | 1200 | O ASN    | 76 | 30.373 | 55.673 | 59.731 | 1.00 | 0.00 | O |
| ATOM | 1201 | N SER    | 77 | 29.989 | 55.037 | 57.612 | 1.00 | 0.00 | N |
| ATOM | 1202 | H SER    | 77 | 29.510 | 55.246 | 56.743 | 1.00 | 0.00 | H |
| ATOM | 1203 | CA SER   | 77 | 30.697 | 53.761 | 57.706 | 1.00 | 0.00 | C |
| ATOM | 1204 | HA SER   | 77 | 30.300 | 53.229 | 58.566 | 1.00 | 0.00 | H |
| ATOM | 1205 | CB SER   | 77 | 30.433 | 52.930 | 56.451 | 1.00 | 0.00 | C |
| ATOM | 1206 | HB2 SER  | 77 | 29.369 | 52.947 | 56.219 | 1.00 | 0.00 | H |
| ATOM | 1207 | HB3 SER  | 77 | 30.989 | 53.348 | 55.611 | 1.00 | 0.00 | H |
| ATOM | 1208 | OG SER   | 77 | 30.808 | 51.589 | 56.662 | 1.00 | 0.00 | O |
| ATOM | 1209 | HG SER   | 77 | 30.198 | 51.240 | 57.334 | 1.00 | 0.00 | H |
| ATOM | 1210 | C SER    | 77 | 32.192 | 53.924 | 57.962 | 1.00 | 0.00 | C |
| ATOM | 1211 | O SER    | 77 | 32.726 | 53.258 | 58.843 | 1.00 | 0.00 | O |
| ATOM | 1212 | N ALA    | 78 | 32.858 | 54.873 | 57.298 | 1.00 | 0.00 | N |
| ATOM | 1213 | H ALA    | 78 | 32.377 | 55.386 | 56.565 | 1.00 | 0.00 | H |
| ATOM | 1214 | CA ALA   | 78 | 34.255 | 55.203 | 57.588 | 1.00 | 0.00 | C |
| ATOM | 1215 | HA ALA   | 78 | 34.861 | 54.304 | 57.459 | 1.00 | 0.00 | H |
| ATOM | 1216 | CB ALA   | 78 | 34.721 | 56.249 | 56.570 | 1.00 | 0.00 | C |
| ATOM | 1217 | HB1 ALA  | 78 | 35.779 | 56.464 | 56.724 | 1.00 | 0.00 | H |
| ATOM | 1218 | HB2 ALA  | 78 | 34.144 | 57.168 | 56.680 | 1.00 | 0.00 | H |
| ATOM | 1219 | HB3 ALA  | 78 | 34.582 | 55.857 | 55.563 | 1.00 | 0.00 | H |
| ATOM | 1220 | C ALA    | 78 | 34.450 | 55.690 | 59.039 | 1.00 | 0.00 | C |
| ATOM | 1221 | O ALA    | 78 | 35.382 | 55.259 | 59.722 | 1.00 | 0.00 | O |
| ATOM | 1222 | N CYS    | 79 | 33.547 | 56.541 | 59.542 | 1.00 | 0.00 | N |
| ATOM | 1223 | H CYS    | 79 | 32.799 | 56.865 | 58.940 | 1.00 | 0.00 | H |
| ATOM | 1224 | CA CYS   | 79 | 33.593 | 57.031 | 60.924 | 1.00 | 0.00 | C |
| ATOM | 1225 | HA CYS   | 79 | 34.597 | 57.404 | 61.129 | 1.00 | 0.00 | H |
| ATOM | 1226 | CB CYS   | 79 | 32.607 | 58.199 | 61.084 | 1.00 | 0.00 | C |
| ATOM | 1227 | HB2 CYS  | 79 | 31.590 | 57.868 | 60.864 | 1.00 | 0.00 | H |
| ATOM | 1228 | HB3 CYS  | 79 | 32.642 | 58.556 | 62.115 | 1.00 | 0.00 | H |
| ATOM | 1229 | SG CYS   | 79 | 33.057 | 59.569 | 59.975 | 1.00 | 0.00 | S |
| ATOM | 1230 | HG CYS   | 79 | 32.556 | 59.026 | 58.854 | 1.00 | 0.00 | H |
| ATOM | 1231 | C CYS    | 79 | 33.311 | 55.919 | 61.951 | 1.00 | 0.00 | C |
| ATOM | 1232 | O CYS    | 79 | 34.016 | 55.807 | 62.954 | 1.00 | 0.00 | O |
| ATOM | 1233 | N LEU    | 80 | 32.314 | 55.066 | 61.697 | 1.00 | 0.00 | N |
| ATOM | 1234 | H LEU    | 80 | 31.755 | 55.220 | 60.863 | 1.00 | 0.00 | H |
| ATOM | 1235 | CA LEU   | 80 | 31.960 | 53.935 | 62.560 | 1.00 | 0.00 | C |
| ATOM | 1236 | HA LEU   | 80 | 31.916 | 54.288 | 63.589 | 1.00 | 0.00 | H |
| ATOM | 1237 | CB LEU   | 80 | 30.572 | 53.401 | 62.161 | 1.00 | 0.00 | C |
| ATOM | 1238 | HB2 LEU  | 80 | 30.560 | 53.266 | 61.079 | 1.00 | 0.00 | H |
| ATOM | 1239 | HB3 LEU  | 80 | 30.418 | 52.423 | 62.620 | 1.00 | 0.00 | H |
| ATOM | 1240 | CG LEU   | 80 | 29.409 | 54.328 | 62.573 | 1.00 | 0.00 | C |
| ATOM | 1241 | HG LEU   | 80 | 29.630 | 55.354 | 62.283 | 1.00 | 0.00 | H |
| ATOM | 1242 | CD1 LEU  | 80 | 28.116 | 53.901 | 61.878 | 1.00 | 0.00 | C |
| ATOM | 1243 | HD11 LEU | 80 | 28.253 | 53.941 | 60.797 | 1.00 | 0.00 | H |
| ATOM | 1244 | HD12 LEU | 80 | 27.309 | 54.581 | 62.153 | 1.00 | 0.00 | H |
| ATOM | 1245 | HD13 LEU | 80 | 27.850 | 52.887 | 62.174 | 1.00 | 0.00 | H |
| ATOM | 1246 | CD2 LEU  | 80 | 29.158 | 54.290 | 64.084 | 1.00 | 0.00 | C |

|      |      |      |     |    |        |        |        |      |      |   |
|------|------|------|-----|----|--------|--------|--------|------|------|---|
| ATOM | 1247 | HD21 | LEU | 80 | 28.959 | 53.268 | 64.405 | 1.00 | 0.00 | H |
| ATOM | 1248 | HD22 | LEU | 80 | 30.023 | 54.678 | 64.620 | 1.00 | 0.00 | H |
| ATOM | 1249 | HD23 | LEU | 80 | 28.299 | 54.917 | 64.327 | 1.00 | 0.00 | H |
| ATOM | 1250 | C    | LEU | 80 | 33.024 | 52.828 | 62.534 | 1.00 | 0.00 | C |
| ATOM | 1251 | O    | LEU | 80 | 33.303 | 52.247 | 63.580 | 1.00 | 0.00 | O |
| ATOM | 1252 | N    | ALA | 81 | 33.677 | 52.581 | 61.395 | 1.00 | 0.00 | N |
| ATOM | 1253 | H    | ALA | 81 | 33.367 | 53.041 | 60.545 | 1.00 | 0.00 | H |
| ATOM | 1254 | CA   | ALA | 81 | 34.836 | 51.696 | 61.305 | 1.00 | 0.00 | C |
| ATOM | 1255 | HA   | ALA | 81 | 34.565 | 50.723 | 61.718 | 1.00 | 0.00 | H |
| ATOM | 1256 | CB   | ALA | 81 | 35.212 | 51.502 | 59.830 | 1.00 | 0.00 | C |
| ATOM | 1257 | HB1  | ALA | 81 | 35.470 | 52.459 | 59.376 | 1.00 | 0.00 | H |
| ATOM | 1258 | HB2  | ALA | 81 | 34.371 | 51.066 | 59.290 | 1.00 | 0.00 | H |
| ATOM | 1259 | HB3  | ALA | 81 | 36.066 | 50.828 | 59.756 | 1.00 | 0.00 | H |
| ATOM | 1260 | C    | ALA | 81 | 36.014 | 52.241 | 62.128 | 1.00 | 0.00 | C |
| ATOM | 1261 | O    | ALA | 81 | 36.602 | 51.494 | 62.907 | 1.00 | 0.00 | O |
| ATOM | 1262 | N    | ALA | 82 | 36.318 | 53.542 | 62.039 | 1.00 | 0.00 | N |
| ATOM | 1263 | H    | ALA | 82 | 35.828 | 54.114 | 61.358 | 1.00 | 0.00 | H |
| ATOM | 1264 | CA   | ALA | 82 | 37.343 | 54.175 | 62.871 | 1.00 | 0.00 | C |
| ATOM | 1265 | HA   | ALA | 82 | 38.284 | 53.646 | 62.718 | 1.00 | 0.00 | H |
| ATOM | 1266 | CB   | ALA | 82 | 37.530 | 55.624 | 62.402 | 1.00 | 0.00 | C |
| ATOM | 1267 | HB1  | ALA | 82 | 36.609 | 56.189 | 62.541 | 1.00 | 0.00 | H |
| ATOM | 1268 | HB2  | ALA | 82 | 37.800 | 55.638 | 61.345 | 1.00 | 0.00 | H |
| ATOM | 1269 | HB3  | ALA | 82 | 38.327 | 56.094 | 62.978 | 1.00 | 0.00 | H |
| ATOM | 1270 | C    | ALA | 82 | 37.013 | 54.092 | 64.378 | 1.00 | 0.00 | C |
| ATOM | 1271 | O    | ALA | 82 | 37.890 | 53.771 | 65.178 | 1.00 | 0.00 | O |
| ATOM | 1272 | N    | PHE | 83 | 35.752 | 54.308 | 64.768 | 1.00 | 0.00 | N |
| ATOM | 1273 | H    | PHE | 83 | 35.087 | 54.624 | 64.068 | 1.00 | 0.00 | H |
| ATOM | 1274 | CA   | PHE | 83 | 35.274 | 54.144 | 66.149 | 1.00 | 0.00 | C |
| ATOM | 1275 | HA   | PHE | 83 | 35.891 | 54.752 | 66.811 | 1.00 | 0.00 | H |
| ATOM | 1276 | CB   | PHE | 83 | 33.830 | 54.668 | 66.219 | 1.00 | 0.00 | C |
| ATOM | 1277 | HB2  | PHE | 83 | 33.830 | 55.726 | 65.955 | 1.00 | 0.00 | H |
| ATOM | 1278 | HB3  | PHE | 83 | 33.232 | 54.152 | 65.469 | 1.00 | 0.00 | H |
| ATOM | 1279 | CG   | PHE | 83 | 33.143 | 54.503 | 67.563 | 1.00 | 0.00 | C |
| ATOM | 1280 | CD1  | PHE | 83 | 33.273 | 55.497 | 68.551 | 1.00 | 0.00 | C |
| ATOM | 1281 | HD1  | PHE | 83 | 33.873 | 56.375 | 68.361 | 1.00 | 0.00 | H |
| ATOM | 1282 | CE1  | PHE | 83 | 32.606 | 55.361 | 69.783 | 1.00 | 0.00 | C |
| ATOM | 1283 | HE1  | PHE | 83 | 32.696 | 56.133 | 70.534 | 1.00 | 0.00 | H |
| ATOM | 1284 | CZ   | PHE | 83 | 31.810 | 54.228 | 70.031 | 1.00 | 0.00 | C |
| ATOM | 1285 | HZ   | PHE | 83 | 31.288 | 54.130 | 70.974 | 1.00 | 0.00 | H |
| ATOM | 1286 | CE2  | PHE | 83 | 31.684 | 53.230 | 69.049 | 1.00 | 0.00 | C |
| ATOM | 1287 | HE2  | PHE | 83 | 31.068 | 52.363 | 69.239 | 1.00 | 0.00 | H |
| ATOM | 1288 | CD2  | PHE | 83 | 32.347 | 53.368 | 67.816 | 1.00 | 0.00 | C |
| ATOM | 1289 | HD2  | PHE | 83 | 32.238 | 52.604 | 67.058 | 1.00 | 0.00 | H |
| ATOM | 1290 | C    | PHE | 83 | 35.375 | 52.689 | 66.642 | 1.00 | 0.00 | C |
| ATOM | 1291 | O    | PHE | 83 | 35.871 | 52.433 | 67.742 | 1.00 | 0.00 | O |
| ATOM | 1292 | N    | ALA | 84 | 34.964 | 51.720 | 65.819 | 1.00 | 0.00 | N |
| ATOM | 1293 | H    | ALA | 84 | 34.539 | 51.980 | 64.935 | 1.00 | 0.00 | H |
| ATOM | 1294 | CA   | ALA | 84 | 35.078 | 50.296 | 66.127 | 1.00 | 0.00 | C |
| ATOM | 1295 | HA   | ALA | 84 | 34.584 | 50.106 | 67.081 | 1.00 | 0.00 | H |
| ATOM | 1296 | CB   | ALA | 84 | 34.353 | 49.496 | 65.037 | 1.00 | 0.00 | C |
| ATOM | 1297 | HB1  | ALA | 84 | 33.305 | 49.795 | 64.991 | 1.00 | 0.00 | H |
| ATOM | 1298 | HB2  | ALA | 84 | 34.407 | 48.431 | 65.265 | 1.00 | 0.00 | H |

|      |      |          |    |        |        |        |      |      |   |
|------|------|----------|----|--------|--------|--------|------|------|---|
| ATOM | 1299 | HB3 ALA  | 84 | 34.815 | 49.676 | 64.065 | 1.00 | 0.00 | H |
| ATOM | 1300 | C ALA    | 84 | 36.546 | 49.864 | 66.268 | 1.00 | 0.00 | C |
| ATOM | 1301 | O ALA    | 84 | 36.887 | 49.169 | 67.225 | 1.00 | 0.00 | O |
| ATOM | 1302 | N ILE    | 85 | 37.423 | 50.322 | 65.370 | 1.00 | 0.00 | N |
| ATOM | 1303 | H ILE    | 85 | 37.065 | 50.869 | 64.591 | 1.00 | 0.00 | H |
| ATOM | 1304 | CA ILE   | 85 | 38.872 | 50.092 | 65.432 | 1.00 | 0.00 | C |
| ATOM | 1305 | HA ILE   | 85 | 39.043 | 49.021 | 65.526 | 1.00 | 0.00 | H |
| ATOM | 1306 | CB ILE   | 85 | 39.542 | 50.549 | 64.112 | 1.00 | 0.00 | C |
| ATOM | 1307 | HB ILE   | 85 | 39.152 | 51.533 | 63.847 | 1.00 | 0.00 | H |
| ATOM | 1308 | CG2 ILE  | 85 | 41.070 | 50.671 | 64.240 | 1.00 | 0.00 | C |
| ATOM | 1309 | HG21 ILE | 85 | 41.316 | 51.474 | 64.933 | 1.00 | 0.00 | H |
| ATOM | 1310 | HG22 ILE | 85 | 41.518 | 50.926 | 63.281 | 1.00 | 0.00 | H |
| ATOM | 1311 | HG23 ILE | 85 | 41.497 | 49.734 | 64.600 | 1.00 | 0.00 | H |
| ATOM | 1312 | CG1 ILE  | 85 | 39.177 | 49.543 | 62.992 | 1.00 | 0.00 | C |
| ATOM | 1313 | HG12 ILE | 85 | 39.674 | 48.590 | 63.179 | 1.00 | 0.00 | H |
| ATOM | 1314 | HG13 ILE | 85 | 38.104 | 49.361 | 63.010 | 1.00 | 0.00 | H |
| ATOM | 1315 | CD1 ILE  | 85 | 39.520 | 50.013 | 61.573 | 1.00 | 0.00 | C |
| ATOM | 1316 | HD11 ILE | 85 | 39.113 | 51.009 | 61.399 | 1.00 | 0.00 | H |
| ATOM | 1317 | HD12 ILE | 85 | 39.084 | 49.322 | 60.851 | 1.00 | 0.00 | H |
| ATOM | 1318 | HD13 ILE | 85 | 40.598 | 50.024 | 61.429 | 1.00 | 0.00 | H |
| ATOM | 1319 | C ILE    | 85 | 39.469 | 50.732 | 66.694 | 1.00 | 0.00 | C |
| ATOM | 1320 | O ILE    | 85 | 40.224 | 50.064 | 67.389 | 1.00 | 0.00 | O |
| ATOM | 1321 | N LEU    | 86 | 39.073 | 51.955 | 67.067 | 1.00 | 0.00 | N |
| ATOM | 1322 | H LEU    | 86 | 38.470 | 52.480 | 66.441 | 1.00 | 0.00 | H |
| ATOM | 1323 | CA LEU   | 86 | 39.505 | 52.603 | 68.314 | 1.00 | 0.00 | C |
| ATOM | 1324 | HA LEU   | 86 | 40.593 | 52.660 | 68.300 | 1.00 | 0.00 | H |
| ATOM | 1325 | CB LEU   | 86 | 38.953 | 54.041 | 68.349 | 1.00 | 0.00 | C |
| ATOM | 1326 | HB2 LEU  | 86 | 39.339 | 54.581 | 67.483 | 1.00 | 0.00 | H |
| ATOM | 1327 | HB3 LEU  | 86 | 37.869 | 54.000 | 68.257 | 1.00 | 0.00 | H |
| ATOM | 1328 | CG LEU   | 86 | 39.292 | 54.840 | 69.623 | 1.00 | 0.00 | C |
| ATOM | 1329 | HG LEU   | 86 | 38.878 | 54.332 | 70.494 | 1.00 | 0.00 | H |
| ATOM | 1330 | CD1 LEU  | 86 | 40.800 | 55.016 | 69.821 | 1.00 | 0.00 | C |
| ATOM | 1331 | HD11 LEU | 86 | 41.270 | 54.048 | 69.991 | 1.00 | 0.00 | H |
| ATOM | 1332 | HD12 LEU | 86 | 40.985 | 55.641 | 70.695 | 1.00 | 0.00 | H |
| ATOM | 1333 | HD13 LEU | 86 | 41.241 | 55.487 | 68.942 | 1.00 | 0.00 | H |
| ATOM | 1334 | CD2 LEU  | 86 | 38.658 | 56.230 | 69.536 | 1.00 | 0.00 | C |
| ATOM | 1335 | HD21 LEU | 86 | 39.064 | 56.774 | 68.684 | 1.00 | 0.00 | H |
| ATOM | 1336 | HD22 LEU | 86 | 37.578 | 56.132 | 69.424 | 1.00 | 0.00 | H |
| ATOM | 1337 | HD23 LEU | 86 | 38.866 | 56.786 | 70.451 | 1.00 | 0.00 | H |
| ATOM | 1338 | C LEU    | 86 | 39.121 | 51.784 | 69.559 | 1.00 | 0.00 | C |
| ATOM | 1339 | O LEU    | 86 | 39.965 | 51.557 | 70.432 | 1.00 | 0.00 | O |
| ATOM | 1340 | N ARG    | 87 | 37.891 | 51.250 | 69.628 | 1.00 | 0.00 | N |
| ATOM | 1341 | H ARG    | 87 | 37.216 | 51.486 | 68.904 | 1.00 | 0.00 | H |
| ATOM | 1342 | CA ARG   | 87 | 37.534 | 50.305 | 70.701 | 1.00 | 0.00 | C |
| ATOM | 1343 | HA ARG   | 87 | 37.793 | 50.778 | 71.651 | 1.00 | 0.00 | H |
| ATOM | 1344 | CB ARG   | 87 | 36.023 | 50.010 | 70.717 | 1.00 | 0.00 | C |
| ATOM | 1345 | HB2 ARG  | 87 | 35.470 | 50.950 | 70.769 | 1.00 | 0.00 | H |
| ATOM | 1346 | HB3 ARG  | 87 | 35.731 | 49.470 | 69.816 | 1.00 | 0.00 | H |
| ATOM | 1347 | CG ARG   | 87 | 35.713 | 49.167 | 71.965 | 1.00 | 0.00 | C |
| ATOM | 1348 | HG2 ARG  | 87 | 36.220 | 48.206 | 71.875 | 1.00 | 0.00 | H |
| ATOM | 1349 | HG3 ARG  | 87 | 36.113 | 49.681 | 72.841 | 1.00 | 0.00 | H |
| ATOM | 1350 | CD ARG   | 87 | 34.234 | 48.878 | 72.222 | 1.00 | 0.00 | C |

|      |      |      |     |    |        |        |        |      |      |   |
|------|------|------|-----|----|--------|--------|--------|------|------|---|
| ATOM | 1351 | HD2  | ARG | 87 | 33.710 | 49.814 | 72.427 | 1.00 | 0.00 | H |
| ATOM | 1352 | HD3  | ARG | 87 | 33.795 | 48.412 | 71.338 | 1.00 | 0.00 | H |
| ATOM | 1353 | NE   | ARG | 87 | 34.150 | 47.991 | 73.395 | 1.00 | 0.00 | N |
| ATOM | 1354 | HE   | ARG | 87 | 34.650 | 48.308 | 74.222 | 1.00 | 0.00 | H |
| ATOM | 1355 | CZ   | ARG | 87 | 33.912 | 46.695 | 73.402 | 1.00 | 0.00 | C |
| ATOM | 1356 | NH1  | ARG | 87 | 33.348 | 46.056 | 72.420 | 1.00 | 0.00 | N |
| ATOM | 1357 | HH11 | ARG | 87 | 32.967 | 46.553 | 71.641 | 1.00 | 0.00 | H |
| ATOM | 1358 | HH12 | ARG | 87 | 33.285 | 45.045 | 72.503 | 1.00 | 0.00 | H |
| ATOM | 1359 | NH2  | ARG | 87 | 34.277 | 45.976 | 74.412 | 1.00 | 0.00 | N |
| ATOM | 1360 | HH21 | ARG | 87 | 34.790 | 46.382 | 75.183 | 1.00 | 0.00 | H |
| ATOM | 1361 | HH22 | ARG | 87 | 34.177 | 44.968 | 74.353 | 1.00 | 0.00 | H |
| ATOM | 1362 | C    | ARG | 87 | 38.381 | 49.029 | 70.629 | 1.00 | 0.00 | C |
| ATOM | 1363 | O    | ARG | 87 | 38.870 | 48.578 | 71.658 | 1.00 | 0.00 | O |
| ATOM | 1364 | N    | ARG | 88 | 38.615 | 48.481 | 69.434 | 1.00 | 0.00 | N |
| ATOM | 1365 | H    | ARG | 88 | 38.186 | 48.936 | 68.633 | 1.00 | 0.00 | H |
| ATOM | 1366 | CA   | ARG | 88 | 39.472 | 47.304 | 69.165 | 1.00 | 0.00 | C |
| ATOM | 1367 | HA   | ARG | 88 | 39.313 | 46.579 | 69.962 | 1.00 | 0.00 | H |
| ATOM | 1368 | CB   | ARG | 88 | 39.039 | 46.660 | 67.828 | 1.00 | 0.00 | C |
| ATOM | 1369 | HB2  | ARG | 88 | 39.147 | 47.402 | 67.039 | 1.00 | 0.00 | H |
| ATOM | 1370 | HB3  | ARG | 88 | 39.703 | 45.828 | 67.586 | 1.00 | 0.00 | H |
| ATOM | 1371 | CG   | ARG | 88 | 37.583 | 46.142 | 67.824 | 1.00 | 0.00 | C |
| ATOM | 1372 | HG2  | ARG | 88 | 36.920 | 46.872 | 68.286 | 1.00 | 0.00 | H |
| ATOM | 1373 | HG3  | ARG | 88 | 37.256 | 46.001 | 66.795 | 1.00 | 0.00 | H |
| ATOM | 1374 | CD   | ARG | 88 | 37.440 | 44.813 | 68.569 | 1.00 | 0.00 | C |
| ATOM | 1375 | HD2  | ARG | 88 | 37.948 | 44.033 | 67.997 | 1.00 | 0.00 | H |
| ATOM | 1376 | HD3  | ARG | 88 | 37.935 | 44.917 | 69.535 | 1.00 | 0.00 | H |
| ATOM | 1377 | NE   | ARG | 88 | 36.026 | 44.434 | 68.779 | 1.00 | 0.00 | N |
| ATOM | 1378 | HE   | ARG | 88 | 35.349 | 44.749 | 68.106 | 1.00 | 0.00 | H |
| ATOM | 1379 | CZ   | ARG | 88 | 35.552 | 43.791 | 69.834 | 1.00 | 0.00 | C |
| ATOM | 1380 | NH1  | ARG | 88 | 36.326 | 43.282 | 70.749 | 1.00 | 0.00 | N |
| ATOM | 1381 | HH11 | ARG | 88 | 37.325 | 43.218 | 70.595 | 1.00 | 0.00 | H |
| ATOM | 1382 | HH12 | ARG | 88 | 35.896 | 42.906 | 71.590 | 1.00 | 0.00 | H |
| ATOM | 1383 | NH2  | ARG | 88 | 34.272 | 43.646 | 70.016 | 1.00 | 0.00 | N |
| ATOM | 1384 | HH21 | ARG | 88 | 33.581 | 43.954 | 69.334 | 1.00 | 0.00 | H |
| ATOM | 1385 | HH22 | ARG | 88 | 33.972 | 43.188 | 70.873 | 1.00 | 0.00 | H |
| ATOM | 1386 | C    | ARG | 88 | 40.992 | 47.593 | 69.236 | 1.00 | 0.00 | C |
| ATOM | 1387 | O    | ARG | 88 | 41.786 | 46.756 | 68.817 | 1.00 | 0.00 | O |
| ATOM | 1388 | N    | ILE | 89 | 41.378 | 48.752 | 69.786 | 1.00 | 0.00 | N |
| ATOM | 1389 | H    | ILE | 89 | 40.652 | 49.438 | 69.923 | 1.00 | 0.00 | H |
| ATOM | 1390 | CA   | ILE | 89 | 42.746 | 49.146 | 70.176 | 1.00 | 0.00 | C |
| ATOM | 1391 | HA   | ILE | 89 | 43.447 | 48.363 | 69.880 | 1.00 | 0.00 | H |
| ATOM | 1392 | CB   | ILE | 89 | 43.125 | 50.451 | 69.425 | 1.00 | 0.00 | C |
| ATOM | 1393 | HB   | ILE | 89 | 42.274 | 51.128 | 69.482 | 1.00 | 0.00 | H |
| ATOM | 1394 | CG2  | ILE | 89 | 44.332 | 51.198 | 70.023 | 1.00 | 0.00 | C |
| ATOM | 1395 | HG21 | ILE | 89 | 44.153 | 51.458 | 71.065 | 1.00 | 0.00 | H |
| ATOM | 1396 | HG22 | ILE | 89 | 44.505 | 52.128 | 69.482 | 1.00 | 0.00 | H |
| ATOM | 1397 | HG23 | ILE | 89 | 45.225 | 50.582 | 69.943 | 1.00 | 0.00 | H |
| ATOM | 1398 | CG1  | ILE | 89 | 43.406 | 50.147 | 67.937 | 1.00 | 0.00 | C |
| ATOM | 1399 | HG12 | ILE | 89 | 44.400 | 49.714 | 67.841 | 1.00 | 0.00 | H |
| ATOM | 1400 | HG13 | ILE | 89 | 42.697 | 49.408 | 67.565 | 1.00 | 0.00 | H |
| ATOM | 1401 | CD1  | ILE | 89 | 43.301 | 51.384 | 67.036 | 1.00 | 0.00 | C |
| ATOM | 1402 | HD11 | ILE | 89 | 42.325 | 51.851 | 67.148 | 1.00 | 0.00 | H |

|      |      |      |     |    |        |        |        |      |      |   |
|------|------|------|-----|----|--------|--------|--------|------|------|---|
| ATOM | 1403 | HD12 | ILE | 89 | 43.430 | 51.081 | 65.998 | 1.00 | 0.00 | H |
| ATOM | 1404 | HD13 | ILE | 89 | 44.077 | 52.108 | 67.282 | 1.00 | 0.00 | H |
| ATOM | 1405 | C    | ILE | 89 | 42.865 | 49.281 | 71.709 | 1.00 | 0.00 | C |
| ATOM | 1406 | O    | ILE | 89 | 43.917 | 48.982 | 72.273 | 1.00 | 0.00 | O |
| ATOM | 1407 | N    | GLN | 90 | 41.798 | 49.700 | 72.410 | 1.00 | 0.00 | N |
| ATOM | 1408 | H    | GLN | 90 | 40.982 | 50.004 | 71.894 | 1.00 | 0.00 | H |
| ATOM | 1409 | CA   | GLN | 90 | 41.724 | 49.684 | 73.886 | 1.00 | 0.00 | C |
| ATOM | 1410 | HA   | GLN | 90 | 42.746 | 49.710 | 74.265 | 1.00 | 0.00 | H |
| ATOM | 1411 | CB   | GLN | 90 | 41.036 | 50.977 | 74.379 | 1.00 | 0.00 | C |
| ATOM | 1412 | HB2  | GLN | 90 | 41.477 | 51.814 | 73.834 | 1.00 | 0.00 | H |
| ATOM | 1413 | HB3  | GLN | 90 | 39.971 | 50.945 | 74.141 | 1.00 | 0.00 | H |
| ATOM | 1414 | CG   | GLN | 90 | 41.226 | 51.245 | 75.888 | 1.00 | 0.00 | C |
| ATOM | 1415 | HG2  | GLN | 90 | 40.475 | 50.697 | 76.456 | 1.00 | 0.00 | H |
| ATOM | 1416 | HG3  | GLN | 90 | 42.211 | 50.893 | 76.196 | 1.00 | 0.00 | H |
| ATOM | 1417 | CD   | GLN | 90 | 41.129 | 52.728 | 76.249 | 1.00 | 0.00 | C |
| ATOM | 1418 | OE1  | GLN | 90 | 42.095 | 53.355 | 76.674 | 1.00 | 0.00 | O |
| ATOM | 1419 | NE2  | GLN | 90 | 39.980 | 53.344 | 76.091 | 1.00 | 0.00 | N |
| ATOM | 1420 | HE21 | GLN | 90 | 39.945 | 54.341 | 76.264 | 1.00 | 0.00 | H |
| ATOM | 1421 | HE22 | GLN | 90 | 39.148 | 52.822 | 75.839 | 1.00 | 0.00 | H |
| ATOM | 1422 | C    | GLN | 90 | 41.102 | 48.383 | 74.455 | 1.00 | 0.00 | C |
| ATOM | 1423 | O    | GLN | 90 | 41.050 | 48.196 | 75.673 | 1.00 | 0.00 | O |
| ATOM | 1424 | N    | GLN | 91 | 40.622 | 47.490 | 73.587 | 1.00 | 0.00 | N |
| ATOM | 1425 | H    | GLN | 91 | 40.648 | 47.766 | 72.612 | 1.00 | 0.00 | H |
| ATOM | 1426 | CA   | GLN | 91 | 40.152 | 46.114 | 73.813 | 1.00 | 0.00 | C |
| ATOM | 1427 | HA   | GLN | 91 | 40.673 | 45.692 | 74.674 | 1.00 | 0.00 | H |
| ATOM | 1428 | CB   | GLN | 91 | 38.629 | 46.089 | 74.086 | 1.00 | 0.00 | C |
| ATOM | 1429 | HB2  | GLN | 91 | 38.099 | 46.637 | 73.306 | 1.00 | 0.00 | H |
| ATOM | 1430 | HB3  | GLN | 91 | 38.292 | 45.053 | 74.030 | 1.00 | 0.00 | H |
| ATOM | 1431 | CG   | GLN | 91 | 38.216 | 46.607 | 75.478 | 1.00 | 0.00 | C |
| ATOM | 1432 | HG2  | GLN | 91 | 37.500 | 45.904 | 75.898 | 1.00 | 0.00 | H |
| ATOM | 1433 | HG3  | GLN | 91 | 39.071 | 46.619 | 76.153 | 1.00 | 0.00 | H |
| ATOM | 1434 | CD   | GLN | 91 | 37.541 | 47.977 | 75.447 | 1.00 | 0.00 | C |
| ATOM | 1435 | OE1  | GLN | 91 | 36.365 | 48.106 | 75.136 | 1.00 | 0.00 | O |
| ATOM | 1436 | NE2  | GLN | 91 | 38.244 | 49.035 | 75.790 | 1.00 | 0.00 | N |
| ATOM | 1437 | HE21 | GLN | 91 | 37.828 | 49.954 | 75.637 | 1.00 | 0.00 | H |
| ATOM | 1438 | HE22 | GLN | 91 | 39.233 | 48.920 | 75.966 | 1.00 | 0.00 | H |
| ATOM | 1439 | C    | GLN | 91 | 40.533 | 45.252 | 72.583 | 1.00 | 0.00 | C |
| ATOM | 1440 | O    | GLN | 91 | 41.138 | 45.763 | 71.646 | 1.00 | 0.00 | O |
| ATOM | 1441 | N    | SER | 92 | 40.215 | 43.950 | 72.572 | 1.00 | 0.00 | N |
| ATOM | 1442 | H    | SER | 92 | 39.650 | 43.605 | 73.334 | 1.00 | 0.00 | H |
| ATOM | 1443 | CA   | SER | 92 | 40.798 | 42.910 | 71.689 | 1.00 | 0.00 | C |
| ATOM | 1444 | HA   | SER | 92 | 40.346 | 41.963 | 71.988 | 1.00 | 0.00 | H |
| ATOM | 1445 | CB   | SER | 92 | 40.447 | 43.090 | 70.202 | 1.00 | 0.00 | C |
| ATOM | 1446 | HB2  | SER | 92 | 40.573 | 44.128 | 69.891 | 1.00 | 0.00 | H |
| ATOM | 1447 | HB3  | SER | 92 | 41.129 | 42.479 | 69.610 | 1.00 | 0.00 | H |
| ATOM | 1448 | OG   | SER | 92 | 39.127 | 42.653 | 69.924 | 1.00 | 0.00 | O |
| ATOM | 1449 | HG   | SER | 92 | 39.186 | 42.097 | 69.129 | 1.00 | 0.00 | H |
| ATOM | 1450 | C    | SER | 92 | 42.309 | 42.696 | 71.870 | 1.00 | 0.00 | C |
| ATOM | 1451 | O    | SER | 92 | 42.720 | 41.561 | 72.091 | 1.00 | 0.00 | O |
| ATOM | 1452 | N    | GLY | 93 | 43.133 | 43.744 | 71.826 | 1.00 | 0.00 | N |
| ATOM | 1453 | H    | GLY | 93 | 42.739 | 44.658 | 71.622 | 1.00 | 0.00 | H |
| ATOM | 1454 | CA   | GLY | 93 | 44.551 | 43.679 | 72.187 | 1.00 | 0.00 | C |

|      |      |      |     |    |        |        |        |      |      |   |
|------|------|------|-----|----|--------|--------|--------|------|------|---|
| ATOM | 1455 | HA2  | GLY | 93 | 44.945 | 42.689 | 71.963 | 1.00 | 0.00 | H |
| ATOM | 1456 | HA3  | GLY | 93 | 45.108 | 44.392 | 71.585 | 1.00 | 0.00 | H |
| ATOM | 1457 | C    | GLY | 93 | 44.839 | 43.991 | 73.658 | 1.00 | 0.00 | C |
| ATOM | 1458 | O    | GLY | 93 | 44.057 | 44.635 | 74.362 | 1.00 | 0.00 | O |
| ATOM | 1459 | N    | SER | 94 | 46.007 | 43.552 | 74.125 | 1.00 | 0.00 | N |
| ATOM | 1460 | H    | SER | 94 | 46.489 | 42.847 | 73.569 | 1.00 | 0.00 | H |
| ATOM | 1461 | CA   | SER | 94 | 46.657 | 43.988 | 75.369 | 1.00 | 0.00 | C |
| ATOM | 1462 | HA   | SER | 94 | 46.560 | 45.071 | 75.466 | 1.00 | 0.00 | H |
| ATOM | 1463 | CB   | SER | 94 | 45.990 | 43.333 | 76.579 | 1.00 | 0.00 | C |
| ATOM | 1464 | HB2  | SER | 94 | 45.627 | 42.335 | 76.322 | 1.00 | 0.00 | H |
| ATOM | 1465 | HB3  | SER | 94 | 46.702 | 43.251 | 77.401 | 1.00 | 0.00 | H |
| ATOM | 1466 | OG   | SER | 94 | 44.918 | 44.171 | 76.973 | 1.00 | 0.00 | O |
| ATOM | 1467 | HG   | SER | 94 | 44.382 | 44.326 | 76.172 | 1.00 | 0.00 | H |
| ATOM | 1468 | C    | SER | 94 | 48.149 | 43.655 | 75.317 | 1.00 | 0.00 | C |
| ATOM | 1469 | O    | SER | 94 | 48.544 | 42.515 | 75.554 | 1.00 | 0.00 | O |
| ATOM | 1470 | N    | ALA | 95 | 48.958 | 44.657 | 74.946 | 1.00 | 0.00 | N |
| ATOM | 1471 | H    | ALA | 95 | 48.522 | 45.553 | 74.803 | 1.00 | 0.00 | H |
| ATOM | 1472 | CA   | ALA | 95 | 50.403 | 44.601 | 74.651 | 1.00 | 0.00 | C |
| ATOM | 1473 | HA   | ALA | 95 | 50.689 | 45.596 | 74.305 | 1.00 | 0.00 | H |
| ATOM | 1474 | CB   | ALA | 95 | 51.180 | 44.362 | 75.952 | 1.00 | 0.00 | C |
| ATOM | 1475 | HB1  | ALA | 95 | 50.910 | 45.116 | 76.694 | 1.00 | 0.00 | H |
| ATOM | 1476 | HB2  | ALA | 95 | 52.250 | 44.435 | 75.756 | 1.00 | 0.00 | H |
| ATOM | 1477 | HB3  | ALA | 95 | 50.962 | 43.370 | 76.349 | 1.00 | 0.00 | H |
| ATOM | 1478 | C    | ALA | 95 | 50.845 | 43.644 | 73.511 | 1.00 | 0.00 | C |
| ATOM | 1479 | O    | ALA | 95 | 51.930 | 43.822 | 72.959 | 1.00 | 0.00 | O |
| ATOM | 1480 | N    | ASP | 96 | 50.016 | 42.666 | 73.136 | 1.00 | 0.00 | N |
| ATOM | 1481 | H    | ASP | 96 | 49.204 | 42.524 | 73.722 | 1.00 | 0.00 | H |
| ATOM | 1482 | CA   | ASP | 96 | 50.329 | 41.601 | 72.177 | 1.00 | 0.00 | C |
| ATOM | 1483 | HA   | ASP | 96 | 51.213 | 41.076 | 72.540 | 1.00 | 0.00 | H |
| ATOM | 1484 | CB   | ASP | 96 | 49.180 | 40.571 | 72.144 | 1.00 | 0.00 | C |
| ATOM | 1485 | HB2  | ASP | 96 | 49.309 | 39.911 | 71.284 | 1.00 | 0.00 | H |
| ATOM | 1486 | HB3  | ASP | 96 | 49.261 | 39.957 | 73.041 | 1.00 | 0.00 | H |
| ATOM | 1487 | CG   | ASP | 96 | 47.777 | 41.193 | 72.110 | 1.00 | 0.00 | C |
| ATOM | 1488 | OD1  | ASP | 96 | 47.064 | 41.129 | 73.133 | 1.00 | 0.00 | O |
| ATOM | 1489 | OD2  | ASP | 96 | 47.352 | 41.741 | 71.065 | 1.00 | 0.00 | O |
| ATOM | 1490 | C    | ASP | 96 | 50.691 | 42.102 | 70.767 | 1.00 | 0.00 | C |
| ATOM | 1491 | O    | ASP | 96 | 51.853 | 41.993 | 70.373 | 1.00 | 0.00 | O |
| ATOM | 1492 | N    | LEU | 97 | 49.701 | 42.599 | 70.012 | 1.00 | 0.00 | N |
| ATOM | 1493 | H    | LEU | 97 | 48.775 | 42.573 | 70.424 | 1.00 | 0.00 | H |
| ATOM | 1494 | CA   | LEU | 97 | 49.823 | 43.109 | 68.645 | 1.00 | 0.00 | C |
| ATOM | 1495 | HA   | LEU | 97 | 50.642 | 43.826 | 68.649 | 1.00 | 0.00 | H |
| ATOM | 1496 | CB   | LEU | 97 | 50.169 | 41.923 | 67.715 | 1.00 | 0.00 | C |
| ATOM | 1497 | HB2  | LEU | 97 | 50.920 | 41.290 | 68.185 | 1.00 | 0.00 | H |
| ATOM | 1498 | HB3  | LEU | 97 | 49.275 | 41.313 | 67.578 | 1.00 | 0.00 | H |
| ATOM | 1499 | CG   | LEU | 97 | 50.718 | 42.328 | 66.339 | 1.00 | 0.00 | C |
| ATOM | 1500 | HG   | LEU | 97 | 49.958 | 42.886 | 65.803 | 1.00 | 0.00 | H |
| ATOM | 1501 | CD1  | LEU | 97 | 51.966 | 43.208 | 66.422 | 1.00 | 0.00 | C |
| ATOM | 1502 | HD11 | LEU | 97 | 51.697 | 44.196 | 66.793 | 1.00 | 0.00 | H |
| ATOM | 1503 | HD12 | LEU | 97 | 52.393 | 43.332 | 65.429 | 1.00 | 0.00 | H |
| ATOM | 1504 | HD13 | LEU | 97 | 52.701 | 42.760 | 67.090 | 1.00 | 0.00 | H |
| ATOM | 1505 | CD2  | LEU | 97 | 51.056 | 41.054 | 65.556 | 1.00 | 0.00 | C |
| ATOM | 1506 | HD21 | LEU | 97 | 51.790 | 40.463 | 66.104 | 1.00 | 0.00 | H |



|      |      |      |     |     |        |        |        |      |      |   |
|------|------|------|-----|-----|--------|--------|--------|------|------|---|
| ATOM | 1507 | HD22 | LEU | 97  | 50.153 | 40.458 | 65.416 | 1.00 | 0.00 | H |
| ATOM | 1508 | HD23 | LEU | 97  | 51.461 | 41.309 | 64.578 | 1.00 | 0.00 | H |
| ATOM | 1509 | C    | LEU | 97  | 48.558 | 43.838 | 68.129 | 1.00 | 0.00 | C |
| ATOM | 1510 | O    | LEU | 97  | 48.675 | 44.692 | 67.250 | 1.00 | 0.00 | O |
| ATOM | 1511 | N    | ARG | 98  | 47.348 | 43.550 | 68.651 | 1.00 | 0.00 | N |
| ATOM | 1512 | H    | ARG | 98  | 47.304 | 42.852 | 69.392 | 1.00 | 0.00 | H |
| ATOM | 1513 | CA   | ARG | 98  | 46.086 | 44.232 | 68.261 | 1.00 | 0.00 | C |
| ATOM | 1514 | HA   | ARG | 98  | 46.109 | 44.396 | 67.183 | 1.00 | 0.00 | H |
| ATOM | 1515 | CB   | ARG | 98  | 44.853 | 43.351 | 68.565 | 1.00 | 0.00 | C |
| ATOM | 1516 | HB2  | ARG | 98  | 44.954 | 42.907 | 69.555 | 1.00 | 0.00 | H |
| ATOM | 1517 | HB3  | ARG | 98  | 43.958 | 43.977 | 68.556 | 1.00 | 0.00 | H |
| ATOM | 1518 | CG   | ARG | 98  | 44.646 | 42.245 | 67.518 | 1.00 | 0.00 | C |
| ATOM | 1519 | HG2  | ARG | 98  | 44.625 | 42.702 | 66.528 | 1.00 | 0.00 | H |
| ATOM | 1520 | HG3  | ARG | 98  | 45.478 | 41.540 | 67.556 | 1.00 | 0.00 | H |
| ATOM | 1521 | CD   | ARG | 98  | 43.320 | 41.489 | 67.713 | 1.00 | 0.00 | C |
| ATOM | 1522 | HD2  | ARG | 98  | 42.498 | 42.206 | 67.752 | 1.00 | 0.00 | H |
| ATOM | 1523 | HD3  | ARG | 98  | 43.166 | 40.840 | 66.848 | 1.00 | 0.00 | H |
| ATOM | 1524 | NE   | ARG | 98  | 43.333 | 40.664 | 68.933 | 1.00 | 0.00 | N |
| ATOM | 1525 | HE   | ARG | 98  | 44.129 | 40.744 | 69.558 | 1.00 | 0.00 | H |
| ATOM | 1526 | CZ   | ARG | 98  | 42.478 | 39.726 | 69.289 | 1.00 | 0.00 | C |
| ATOM | 1527 | NH1  | ARG | 98  | 41.361 | 39.499 | 68.662 | 1.00 | 0.00 | N |
| ATOM | 1528 | HH11 | ARG | 98  | 41.039 | 40.145 | 67.953 | 1.00 | 0.00 | H |
| ATOM | 1529 | HH12 | ARG | 98  | 40.764 | 38.731 | 68.943 | 1.00 | 0.00 | H |
| ATOM | 1530 | NH2  | ARG | 98  | 42.759 | 38.988 | 70.312 | 1.00 | 0.00 | N |
| ATOM | 1531 | HH21 | ARG | 98  | 43.597 | 39.222 | 70.834 | 1.00 | 0.00 | H |
| ATOM | 1532 | HH22 | ARG | 98  | 42.091 | 38.313 | 70.665 | 1.00 | 0.00 | H |
| ATOM | 1533 | C    | ARG | 98  | 45.976 | 45.645 | 68.867 | 1.00 | 0.00 | C |
| ATOM | 1534 | O    | ARG | 98  | 45.111 | 45.926 | 69.688 | 1.00 | 0.00 | O |
| ATOM | 1535 | N    | LYS | 99  | 46.902 | 46.523 | 68.475 | 1.00 | 0.00 | N |
| ATOM | 1536 | H    | LYS | 99  | 47.601 | 46.167 | 67.831 | 1.00 | 0.00 | H |
| ATOM | 1537 | CA   | LYS | 99  | 47.015 | 47.933 | 68.891 | 1.00 | 0.00 | C |
| ATOM | 1538 | HA   | LYS | 99  | 46.012 | 48.347 | 69.004 | 1.00 | 0.00 | H |
| ATOM | 1539 | CB   | LYS | 99  | 47.722 | 47.935 | 70.272 | 1.00 | 0.00 | C |
| ATOM | 1540 | HB2  | LYS | 99  | 47.362 | 47.083 | 70.853 | 1.00 | 0.00 | H |
| ATOM | 1541 | HB3  | LYS | 99  | 48.795 | 47.796 | 70.123 | 1.00 | 0.00 | H |
| ATOM | 1542 | CG   | LYS | 99  | 47.485 | 49.184 | 71.137 | 1.00 | 0.00 | C |
| ATOM | 1543 | HG2  | LYS | 99  | 47.835 | 50.075 | 70.616 | 1.00 | 0.00 | H |
| ATOM | 1544 | HG3  | LYS | 99  | 46.418 | 49.280 | 71.329 | 1.00 | 0.00 | H |
| ATOM | 1545 | CD   | LYS | 99  | 48.214 | 49.067 | 72.485 | 1.00 | 0.00 | C |
| ATOM | 1546 | HD2  | LYS | 99  | 47.836 | 48.196 | 73.023 | 1.00 | 0.00 | H |
| ATOM | 1547 | HD3  | LYS | 99  | 49.284 | 48.941 | 72.307 | 1.00 | 0.00 | H |
| ATOM | 1548 | CE   | LYS | 99  | 47.983 | 50.327 | 73.327 | 1.00 | 0.00 | C |
| ATOM | 1549 | HE2  | LYS | 99  | 48.370 | 51.187 | 72.774 | 1.00 | 0.00 | H |
| ATOM | 1550 | HE3  | LYS | 99  | 46.908 | 50.471 | 73.463 | 1.00 | 0.00 | H |
| ATOM | 1551 | NZ   | LYS | 99  | 48.652 | 50.244 | 74.649 | 1.00 | 0.00 | N |
| ATOM | 1552 | HZ1  | LYS | 99  | 48.241 | 49.529 | 75.250 | 1.00 | 0.00 | H |
| ATOM | 1553 | HZ2  | LYS | 99  | 48.587 | 51.124 | 75.139 | 1.00 | 0.00 | H |
| ATOM | 1554 | HZ3  | LYS | 99  | 49.639 | 49.998 | 74.555 | 1.00 | 0.00 | H |
| ATOM | 1555 | C    | LYS | 99  | 47.758 | 48.786 | 67.825 | 1.00 | 0.00 | C |
| ATOM | 1556 | O    | LYS | 99  | 48.529 | 49.667 | 68.184 | 1.00 | 0.00 | O |
| ATOM | 1557 | N    | LEU | 100 | 47.798 | 48.415 | 66.534 | 1.00 | 0.00 | N |
| ATOM | 1558 | H    | LEU | 100 | 48.669 | 48.735 | 66.140 | 1.00 | 0.00 | H |

|      |      |      |     |     |        |        |        |      |      |   |
|------|------|------|-----|-----|--------|--------|--------|------|------|---|
| ATOM | 1559 | CA   | LEU | 100 | 46.721 | 48.415 | 65.511 | 1.00 | 0.00 | C |
| ATOM | 1560 | HA   | LEU | 100 | 47.190 | 48.020 | 64.610 | 1.00 | 0.00 | H |
| ATOM | 1561 | CB   | LEU | 100 | 45.566 | 47.446 | 65.842 | 1.00 | 0.00 | C |
| ATOM | 1562 | HB2  | LEU | 100 | 45.982 | 46.447 | 65.968 | 1.00 | 0.00 | H |
| ATOM | 1563 | HB3  | LEU | 100 | 45.116 | 47.759 | 66.783 | 1.00 | 0.00 | H |
| ATOM | 1564 | CG   | LEU | 100 | 44.436 | 47.363 | 64.798 | 1.00 | 0.00 | C |
| ATOM | 1565 | HG   | LEU | 100 | 44.019 | 48.355 | 64.623 | 1.00 | 0.00 | H |
| ATOM | 1566 | CD1  | LEU | 100 | 44.921 | 46.777 | 63.468 | 1.00 | 0.00 | C |
| ATOM | 1567 | HD11 | LEU | 100 | 45.671 | 47.423 | 63.017 | 1.00 | 0.00 | H |
| ATOM | 1568 | HD12 | LEU | 100 | 44.083 | 46.700 | 62.774 | 1.00 | 0.00 | H |
| ATOM | 1569 | HD13 | LEU | 100 | 45.345 | 45.785 | 63.624 | 1.00 | 0.00 | H |
| ATOM | 1570 | CD2  | LEU | 100 | 43.320 | 46.461 | 65.327 | 1.00 | 0.00 | C |
| ATOM | 1571 | HD21 | LEU | 100 | 43.696 | 45.454 | 65.503 | 1.00 | 0.00 | H |
| ATOM | 1572 | HD22 | LEU | 100 | 42.934 | 46.866 | 66.265 | 1.00 | 0.00 | H |
| ATOM | 1573 | HD23 | LEU | 100 | 42.504 | 46.423 | 64.607 | 1.00 | 0.00 | H |
| ATOM | 1574 | C    | LEU | 100 | 46.263 | 49.841 | 65.138 | 1.00 | 0.00 | C |
| ATOM | 1575 | O    | LEU | 100 | 46.071 | 50.666 | 66.021 | 1.00 | 0.00 | O |
| ATOM | 1576 | N    | ASP | 101 | 46.129 | 50.140 | 63.838 | 1.00 | 0.00 | N |
| ATOM | 1577 | H    | ASP | 101 | 46.284 | 49.421 | 63.147 | 1.00 | 0.00 | H |
| ATOM | 1578 | CA   | ASP | 101 | 45.831 | 51.483 | 63.306 | 1.00 | 0.00 | C |
| ATOM | 1579 | HA   | ASP | 101 | 45.012 | 51.917 | 63.883 | 1.00 | 0.00 | H |
| ATOM | 1580 | CB   | ASP | 101 | 47.088 | 52.351 | 63.496 | 1.00 | 0.00 | C |
| ATOM | 1581 | HB2  | ASP | 101 | 47.493 | 52.199 | 64.496 | 1.00 | 0.00 | H |
| ATOM | 1582 | HB3  | ASP | 101 | 47.853 | 52.029 | 62.793 | 1.00 | 0.00 | H |
| ATOM | 1583 | CG   | ASP | 101 | 46.843 | 53.848 | 63.350 | 1.00 | 0.00 | C |
| ATOM | 1584 | OD1  | ASP | 101 | 45.692 | 54.297 | 63.160 | 1.00 | 0.00 | O |
| ATOM | 1585 | OD2  | ASP | 101 | 47.824 | 54.613 | 63.449 | 1.00 | 0.00 | O |
| ATOM | 1586 | C    | ASP | 101 | 45.409 | 51.426 | 61.813 | 1.00 | 0.00 | C |
| ATOM | 1587 | O    | ASP | 101 | 45.701 | 50.443 | 61.132 | 1.00 | 0.00 | O |
| ATOM | 1588 | N    | CYS | 102 | 44.747 | 52.458 | 61.275 | 1.00 | 0.00 | N |
| ATOM | 1589 | H    | CYS | 102 | 44.678 | 53.307 | 61.833 | 1.00 | 0.00 | H |
| ATOM | 1590 | CA   | CYS | 102 | 44.016 | 52.412 | 59.995 | 1.00 | 0.00 | C |
| ATOM | 1591 | HA   | CYS | 102 | 44.385 | 51.579 | 59.393 | 1.00 | 0.00 | H |
| ATOM | 1592 | CB   | CYS | 102 | 42.542 | 52.131 | 60.334 | 1.00 | 0.00 | C |
| ATOM | 1593 | HB2  | CYS | 102 | 42.495 | 51.236 | 60.956 | 1.00 | 0.00 | H |
| ATOM | 1594 | HB3  | CYS | 102 | 42.133 | 52.970 | 60.900 | 1.00 | 0.00 | H |
| ATOM | 1595 | SG   | CYS | 102 | 41.522 | 51.849 | 58.855 | 1.00 | 0.00 | S |
| ATOM | 1596 | HG   | CYS | 102 | 41.703 | 53.034 | 58.257 | 1.00 | 0.00 | H |
| ATOM | 1597 | C    | CYS | 102 | 44.166 | 53.692 | 59.144 | 1.00 | 0.00 | C |
| ATOM | 1598 | O    | CYS | 102 | 44.393 | 54.783 | 59.674 | 1.00 | 0.00 | O |
| ATOM | 1599 | N    | ARG | 103 | 43.991 | 53.562 | 57.822 | 1.00 | 0.00 | N |
| ATOM | 1600 | H    | ARG | 103 | 43.891 | 52.612 | 57.459 | 1.00 | 0.00 | H |
| ATOM | 1601 | CA   | ARG | 103 | 43.919 | 54.640 | 56.820 | 1.00 | 0.00 | C |
| ATOM | 1602 | HA   | ARG | 103 | 43.687 | 55.582 | 57.316 | 1.00 | 0.00 | H |
| ATOM | 1603 | CB   | ARG | 103 | 45.278 | 54.749 | 56.099 | 1.00 | 0.00 | C |
| ATOM | 1604 | HB2  | ARG | 103 | 45.501 | 53.781 | 55.645 | 1.00 | 0.00 | H |
| ATOM | 1605 | HB3  | ARG | 103 | 45.178 | 55.468 | 55.290 | 1.00 | 0.00 | H |
| ATOM | 1606 | CG   | ARG | 103 | 46.482 | 55.147 | 56.981 | 1.00 | 0.00 | C |
| ATOM | 1607 | HG2  | ARG | 103 | 46.620 | 54.396 | 57.758 | 1.00 | 0.00 | H |
| ATOM | 1608 | HG3  | ARG | 103 | 47.376 | 55.152 | 56.356 | 1.00 | 0.00 | H |
| ATOM | 1609 | CD   | ARG | 103 | 46.327 | 56.532 | 57.628 | 1.00 | 0.00 | C |
| ATOM | 1610 | HD2  | ARG | 103 | 46.287 | 57.273 | 56.836 | 1.00 | 0.00 | H |

|      |      |          |     |        |        |        |      |      |   |
|------|------|----------|-----|--------|--------|--------|------|------|---|
| ATOM | 1611 | HD3 ARG  | 103 | 45.386 | 56.563 | 58.175 | 1.00 | 0.00 | H |
| ATOM | 1612 | NE ARG   | 103 | 47.418 | 56.866 | 58.571 | 1.00 | 0.00 | N |
| ATOM | 1613 | HE ARG   | 103 | 47.926 | 56.100 | 58.972 | 1.00 | 0.00 | H |
| ATOM | 1614 | CZ ARG   | 103 | 47.665 | 58.074 | 59.055 | 1.00 | 0.00 | C |
| ATOM | 1615 | NH1 ARG  | 103 | 47.086 | 59.139 | 58.595 | 1.00 | 0.00 | N |
| ATOM | 1616 | HH11 ARG | 103 | 46.492 | 59.116 | 57.781 | 1.00 | 0.00 | H |
| ATOM | 1617 | HH12 ARG | 103 | 47.210 | 60.030 | 59.057 | 1.00 | 0.00 | H |
| ATOM | 1618 | NH2 ARG  | 103 | 48.474 | 58.265 | 60.057 | 1.00 | 0.00 | N |
| ATOM | 1619 | HH21 ARG | 103 | 48.887 | 57.521 | 60.592 | 1.00 | 0.00 | H |
| ATOM | 1620 | HH22 ARG | 103 | 48.617 | 59.189 | 60.428 | 1.00 | 0.00 | H |
| ATOM | 1621 | C ARG    | 103 | 42.773 | 54.378 | 55.822 | 1.00 | 0.00 | C |
| ATOM | 1622 | O ARG    | 103 | 42.415 | 53.224 | 55.590 | 1.00 | 0.00 | O |
| ATOM | 1623 | N PHE    | 104 | 42.156 | 55.436 | 55.284 | 1.00 | 0.00 | N |
| ATOM | 1624 | H PHE    | 104 | 42.446 | 56.354 | 55.588 | 1.00 | 0.00 | H |
| ATOM | 1625 | CA PHE   | 104 | 40.895 | 55.359 | 54.526 | 1.00 | 0.00 | C |
| ATOM | 1626 | HA PHE   | 104 | 40.851 | 54.403 | 54.005 | 1.00 | 0.00 | H |
| ATOM | 1627 | CB PHE   | 104 | 39.729 | 55.426 | 55.535 | 1.00 | 0.00 | C |
| ATOM | 1628 | HB2 PHE  | 104 | 40.076 | 55.062 | 56.503 | 1.00 | 0.00 | H |
| ATOM | 1629 | HB3 PHE  | 104 | 39.457 | 56.470 | 55.684 | 1.00 | 0.00 | H |
| ATOM | 1630 | CG PHE   | 104 | 38.469 | 54.651 | 55.186 | 1.00 | 0.00 | C |
| ATOM | 1631 | CD1 PHE  | 104 | 38.109 | 53.529 | 55.960 | 1.00 | 0.00 | C |
| ATOM | 1632 | HD1 PHE  | 104 | 38.751 | 53.194 | 56.762 | 1.00 | 0.00 | H |
| ATOM | 1633 | CE1 PHE  | 104 | 36.908 | 52.844 | 55.706 | 1.00 | 0.00 | C |
| ATOM | 1634 | HE1 PHE  | 104 | 36.635 | 51.988 | 56.309 | 1.00 | 0.00 | H |
| ATOM | 1635 | CZ PHE   | 104 | 36.058 | 53.279 | 54.676 | 1.00 | 0.00 | C |
| ATOM | 1636 | HZ PHE   | 104 | 35.124 | 52.767 | 54.492 | 1.00 | 0.00 | H |
| ATOM | 1637 | CE2 PHE  | 104 | 36.420 | 54.383 | 53.888 | 1.00 | 0.00 | C |
| ATOM | 1638 | HE2 PHE  | 104 | 35.764 | 54.709 | 53.095 | 1.00 | 0.00 | H |
| ATOM | 1639 | CD2 PHE  | 104 | 37.617 | 55.076 | 54.147 | 1.00 | 0.00 | C |
| ATOM | 1640 | HD2 PHE  | 104 | 37.869 | 55.943 | 53.554 | 1.00 | 0.00 | H |
| ATOM | 1641 | C PHE    | 104 | 40.772 | 56.492 | 53.483 | 1.00 | 0.00 | C |
| ATOM | 1642 | O PHE    | 104 | 41.057 | 57.653 | 53.785 | 1.00 | 0.00 | O |
| ATOM | 1643 | N GLY    | 105 | 40.293 | 56.174 | 52.277 | 1.00 | 0.00 | N |
| ATOM | 1644 | H GLY    | 105 | 40.090 | 55.195 | 52.091 | 1.00 | 0.00 | H |
| ATOM | 1645 | CA GLY   | 105 | 39.990 | 57.118 | 51.194 | 1.00 | 0.00 | C |
| ATOM | 1646 | HA2 GLY  | 105 | 40.061 | 58.135 | 51.567 | 1.00 | 0.00 | H |
| ATOM | 1647 | HA3 GLY  | 105 | 40.723 | 57.004 | 50.397 | 1.00 | 0.00 | H |
| ATOM | 1648 | C GLY    | 105 | 38.596 | 56.895 | 50.592 | 1.00 | 0.00 | C |
| ATOM | 1649 | O GLY    | 105 | 38.134 | 55.753 | 50.520 | 1.00 | 0.00 | O |
| ATOM | 1650 | N ILE    | 106 | 37.919 | 57.975 | 50.168 | 1.00 | 0.00 | N |
| ATOM | 1651 | H ILE    | 106 | 38.345 | 58.886 | 50.302 | 1.00 | 0.00 | H |
| ATOM | 1652 | CA ILE   | 106 | 36.559 | 57.915 | 49.586 | 1.00 | 0.00 | C |
| ATOM | 1653 | HA ILE   | 106 | 36.384 | 56.885 | 49.286 | 1.00 | 0.00 | H |
| ATOM | 1654 | CB ILE   | 106 | 35.448 | 58.275 | 50.611 | 1.00 | 0.00 | C |
| ATOM | 1655 | HB ILE   | 106 | 35.467 | 59.353 | 50.767 | 1.00 | 0.00 | H |
| ATOM | 1656 | CG2 ILE  | 106 | 34.062 | 57.911 | 50.037 | 1.00 | 0.00 | C |
| ATOM | 1657 | HG21 ILE | 106 | 33.893 | 58.385 | 49.073 | 1.00 | 0.00 | H |
| ATOM | 1658 | HG22 ILE | 106 | 33.270 | 58.250 | 50.704 | 1.00 | 0.00 | H |
| ATOM | 1659 | HG23 ILE | 106 | 33.982 | 56.830 | 49.920 | 1.00 | 0.00 | H |
| ATOM | 1660 | CG1 ILE  | 106 | 35.660 | 57.592 | 51.981 | 1.00 | 0.00 | C |
| ATOM | 1661 | HG12 ILE | 106 | 35.731 | 56.517 | 51.826 | 1.00 | 0.00 | H |
| ATOM | 1662 | HG13 ILE | 106 | 36.601 | 57.939 | 52.408 | 1.00 | 0.00 | H |

|      |      |      |     |     |        |        |        |      |      |   |
|------|------|------|-----|-----|--------|--------|--------|------|------|---|
| ATOM | 1663 | CD1  | ILE | 106 | 34.570 | 57.869 | 53.026 | 1.00 | 0.00 | C |
| ATOM | 1664 | HD11 | ILE | 106 | 34.341 | 58.933 | 53.061 | 1.00 | 0.00 | H |
| ATOM | 1665 | HD12 | ILE | 106 | 34.929 | 57.555 | 54.004 | 1.00 | 0.00 | H |
| ATOM | 1666 | HD13 | ILE | 106 | 33.666 | 57.309 | 52.791 | 1.00 | 0.00 | H |
| ATOM | 1667 | C    | ILE | 106 | 36.420 | 58.784 | 48.326 | 1.00 | 0.00 | C |
| ATOM | 1668 | O    | ILE | 106 | 36.671 | 59.994 | 48.362 | 1.00 | 0.00 | O |
| ATOM | 1669 | N    | ASN | 107 | 35.907 | 58.186 | 47.243 | 1.00 | 0.00 | N |
| ATOM | 1670 | H    | ASN | 107 | 35.660 | 57.205 | 47.330 | 1.00 | 0.00 | H |
| ATOM | 1671 | CA   | ASN | 107 | 35.612 | 58.848 | 45.964 | 1.00 | 0.00 | C |
| ATOM | 1672 | HA   | ASN | 107 | 35.599 | 59.927 | 46.119 | 1.00 | 0.00 | H |
| ATOM | 1673 | CB   | ASN | 107 | 36.726 | 58.527 | 44.949 | 1.00 | 0.00 | C |
| ATOM | 1674 | HB2  | ASN | 107 | 37.176 | 57.567 | 45.179 | 1.00 | 0.00 | H |
| ATOM | 1675 | HB3  | ASN | 107 | 36.321 | 58.460 | 43.941 | 1.00 | 0.00 | H |
| ATOM | 1676 | CG   | ASN | 107 | 37.808 | 59.581 | 44.954 | 1.00 | 0.00 | C |
| ATOM | 1677 | OD1  | ASN | 107 | 38.734 | 59.564 | 45.740 | 1.00 | 0.00 | O |
| ATOM | 1678 | ND2  | ASN | 107 | 37.716 | 60.554 | 44.076 | 1.00 | 0.00 | N |
| ATOM | 1679 | HD21 | ASN | 107 | 36.970 | 60.586 | 43.406 | 1.00 | 0.00 | H |
| ATOM | 1680 | HD22 | ASN | 107 | 38.449 | 61.239 | 44.103 | 1.00 | 0.00 | H |
| ATOM | 1681 | C    | ASN | 107 | 34.229 | 58.477 | 45.397 | 1.00 | 0.00 | C |
| ATOM | 1682 | O    | ASN | 107 | 33.647 | 57.452 | 45.746 | 1.00 | 0.00 | O |
| ATOM | 1683 | N    | ALA | 108 | 33.742 | 59.297 | 44.461 | 1.00 | 0.00 | N |
| ATOM | 1684 | H    | ALA | 108 | 34.265 | 60.129 | 44.236 | 1.00 | 0.00 | H |
| ATOM | 1685 | CA   | ALA | 108 | 32.573 | 59.033 | 43.621 | 1.00 | 0.00 | C |
| ATOM | 1686 | HA   | ALA | 108 | 32.402 | 57.957 | 43.598 | 1.00 | 0.00 | H |
| ATOM | 1687 | CB   | ALA | 108 | 31.342 | 59.693 | 44.256 | 1.00 | 0.00 | C |
| ATOM | 1688 | HB1  | ALA | 108 | 31.185 | 59.291 | 45.258 | 1.00 | 0.00 | H |
| ATOM | 1689 | HB2  | ALA | 108 | 30.456 | 59.481 | 43.656 | 1.00 | 0.00 | H |
| ATOM | 1690 | HB3  | ALA | 108 | 31.484 | 60.772 | 44.320 | 1.00 | 0.00 | H |
| ATOM | 1691 | C    | ALA | 108 | 32.842 | 59.530 | 42.177 | 1.00 | 0.00 | C |
| ATOM | 1692 | O    | ALA | 108 | 33.598 | 60.487 | 41.999 | 1.00 | 0.00 | O |
| ATOM | 1693 | N    | GLY | 109 | 32.282 | 58.933 | 41.121 | 1.00 | 0.00 | N |
| ATOM | 1694 | H    | GLY | 109 | 32.626 | 59.226 | 40.220 | 1.00 | 0.00 | H |
| ATOM | 1695 | CA   | GLY | 109 | 31.337 | 57.810 | 41.169 | 1.00 | 0.00 | C |
| ATOM | 1696 | HA2  | GLY | 109 | 31.706 | 57.051 | 41.852 | 1.00 | 0.00 | H |
| ATOM | 1697 | HA3  | GLY | 109 | 30.387 | 58.178 | 41.557 | 1.00 | 0.00 | H |
| ATOM | 1698 | C    | GLY | 109 | 31.035 | 57.084 | 39.856 | 1.00 | 0.00 | C |
| ATOM | 1699 | O    | GLY | 109 | 30.564 | 55.954 | 39.920 | 1.00 | 0.00 | O |
| ATOM | 1700 | N    | ASP | 110 | 31.277 | 57.678 | 38.685 | 1.00 | 0.00 | N |
| ATOM | 1701 | H    | ASP | 110 | 31.700 | 58.589 | 38.670 | 1.00 | 0.00 | H |
| ATOM | 1702 | CA   | ASP | 110 | 30.980 | 57.054 | 37.384 | 1.00 | 0.00 | C |
| ATOM | 1703 | HA   | ASP | 110 | 29.921 | 56.791 | 37.355 | 1.00 | 0.00 | H |
| ATOM | 1704 | CB   | ASP | 110 | 31.254 | 58.104 | 36.288 | 1.00 | 0.00 | C |
| ATOM | 1705 | HB2  | ASP | 110 | 30.851 | 59.063 | 36.620 | 1.00 | 0.00 | H |
| ATOM | 1706 | HB3  | ASP | 110 | 32.332 | 58.224 | 36.166 | 1.00 | 0.00 | H |
| ATOM | 1707 | CG   | ASP | 110 | 30.621 | 57.798 | 34.927 | 1.00 | 0.00 | C |
| ATOM | 1708 | OD1  | ASP | 110 | 29.837 | 56.834 | 34.827 | 1.00 | 0.00 | O |
| ATOM | 1709 | OD2  | ASP | 110 | 30.880 | 58.583 | 33.982 | 1.00 | 0.00 | O |
| ATOM | 1710 | C    | ASP | 110 | 31.799 | 55.762 | 37.185 | 1.00 | 0.00 | C |
| ATOM | 1711 | O    | ASP | 110 | 33.029 | 55.785 | 37.330 | 1.00 | 0.00 | O |
| ATOM | 1712 | N    | CYS | 111 | 31.145 | 54.624 | 36.922 | 1.00 | 0.00 | N |
| ATOM | 1713 | H    | CYS | 111 | 30.134 | 54.650 | 36.841 | 1.00 | 0.00 | H |
| ATOM | 1714 | CA   | CYS | 111 | 31.799 | 53.320 | 36.769 | 1.00 | 0.00 | C |

|      |      |      |     |     |        |        |        |      |      |   |
|------|------|------|-----|-----|--------|--------|--------|------|------|---|
| ATOM | 1715 | HA   | CYS | 111 | 32.699 | 53.487 | 36.188 | 1.00 | 0.00 | H |
| ATOM | 1716 | CB   | CYS | 111 | 32.189 | 52.777 | 38.160 | 1.00 | 0.00 | C |
| ATOM | 1717 | HB2  | CYS | 111 | 32.846 | 51.914 | 38.042 | 1.00 | 0.00 | H |
| ATOM | 1718 | HB3  | CYS | 111 | 32.728 | 53.545 | 38.715 | 1.00 | 0.00 | H |
| ATOM | 1719 | SG   | CYS | 111 | 30.732 | 52.281 | 39.123 | 1.00 | 0.00 | S |
| ATOM | 1720 | HG   | CYS | 111 | 30.043 | 53.426 | 38.956 | 1.00 | 0.00 | H |
| ATOM | 1721 | C    | CYS | 111 | 30.975 | 52.289 | 35.979 | 1.00 | 0.00 | C |
| ATOM | 1722 | O    | CYS | 111 | 29.751 | 52.402 | 35.862 | 1.00 | 0.00 | O |
| ATOM | 1723 | N    | MET | 112 | 31.652 | 51.250 | 35.467 | 1.00 | 0.00 | N |
| ATOM | 1724 | H    | MET | 112 | 32.651 | 51.197 | 35.623 | 1.00 | 0.00 | H |
| ATOM | 1725 | CA   | MET | 112 | 30.977 | 50.019 | 35.040 | 1.00 | 0.00 | C |
| ATOM | 1726 | HA   | MET | 112 | 29.957 | 50.278 | 34.766 | 1.00 | 0.00 | H |
| ATOM | 1727 | CB   | MET | 112 | 31.618 | 49.411 | 33.781 | 1.00 | 0.00 | C |
| ATOM | 1728 | HB2  | MET | 112 | 30.958 | 48.618 | 33.425 | 1.00 | 0.00 | H |
| ATOM | 1729 | HB3  | MET | 112 | 31.668 | 50.172 | 33.002 | 1.00 | 0.00 | H |
| ATOM | 1730 | CG   | MET | 112 | 33.016 | 48.810 | 33.970 | 1.00 | 0.00 | C |
| ATOM | 1731 | HG2  | MET | 112 | 33.724 | 49.619 | 34.143 | 1.00 | 0.00 | H |
| ATOM | 1732 | HG3  | MET | 112 | 33.019 | 48.152 | 34.838 | 1.00 | 0.00 | H |
| ATOM | 1733 | SD   | MET | 112 | 33.571 | 47.847 | 32.539 | 1.00 | 0.00 | S |
| ATOM | 1734 | CE   | MET | 112 | 35.214 | 47.345 | 33.113 | 1.00 | 0.00 | C |
| ATOM | 1735 | HE1  | MET | 112 | 35.725 | 46.802 | 32.317 | 1.00 | 0.00 | H |
| ATOM | 1736 | HE2  | MET | 112 | 35.797 | 48.227 | 33.379 | 1.00 | 0.00 | H |
| ATOM | 1737 | HE3  | MET | 112 | 35.114 | 46.697 | 33.983 | 1.00 | 0.00 | H |
| ATOM | 1738 | C    | MET | 112 | 30.904 | 49.022 | 36.204 | 1.00 | 0.00 | C |
| ATOM | 1739 | O    | MET | 112 | 31.834 | 48.937 | 37.005 | 1.00 | 0.00 | O |
| ATOM | 1740 | N    | VAL | 113 | 29.819 | 48.249 | 36.280 | 1.00 | 0.00 | N |
| ATOM | 1741 | H    | VAL | 113 | 29.084 | 48.413 | 35.598 | 1.00 | 0.00 | H |
| ATOM | 1742 | CA   | VAL | 113 | 29.562 | 47.241 | 37.322 | 1.00 | 0.00 | C |
| ATOM | 1743 | HA   | VAL | 113 | 30.492 | 47.033 | 37.846 | 1.00 | 0.00 | H |
| ATOM | 1744 | CB   | VAL | 113 | 28.527 | 47.736 | 38.358 | 1.00 | 0.00 | C |
| ATOM | 1745 | HB   | VAL | 113 | 27.542 | 47.768 | 37.892 | 1.00 | 0.00 | H |
| ATOM | 1746 | CG1  | VAL | 113 | 28.455 | 46.780 | 39.557 | 1.00 | 0.00 | C |
| ATOM | 1747 | HG11 | VAL | 113 | 28.147 | 45.787 | 39.229 | 1.00 | 0.00 | H |
| ATOM | 1748 | HG12 | VAL | 113 | 29.431 | 46.714 | 40.039 | 1.00 | 0.00 | H |
| ATOM | 1749 | HG13 | VAL | 113 | 27.723 | 47.144 | 40.278 | 1.00 | 0.00 | H |
| ATOM | 1750 | CG2  | VAL | 113 | 28.826 | 49.145 | 38.885 | 1.00 | 0.00 | C |
| ATOM | 1751 | HG21 | VAL | 113 | 28.703 | 49.877 | 38.086 | 1.00 | 0.00 | H |
| ATOM | 1752 | HG22 | VAL | 113 | 29.849 | 49.198 | 39.249 | 1.00 | 0.00 | H |
| ATOM | 1753 | HG23 | VAL | 113 | 28.140 | 49.404 | 39.691 | 1.00 | 0.00 | H |
| ATOM | 1754 | C    | VAL | 113 | 29.083 | 45.944 | 36.672 | 1.00 | 0.00 | C |
| ATOM | 1755 | O    | VAL | 113 | 28.098 | 45.960 | 35.929 | 1.00 | 0.00 | O |
| ATOM | 1756 | N    | GLY | 114 | 29.762 | 44.826 | 36.938 | 1.00 | 0.00 | N |
| ATOM | 1757 | H    | GLY | 114 | 30.563 | 44.865 | 37.565 | 1.00 | 0.00 | H |
| ATOM | 1758 | CA   | GLY | 114 | 29.428 | 43.537 | 36.330 | 1.00 | 0.00 | C |
| ATOM | 1759 | HA2  | GLY | 114 | 28.459 | 43.206 | 36.701 | 1.00 | 0.00 | H |
| ATOM | 1760 | HA3  | GLY | 114 | 29.341 | 43.674 | 35.253 | 1.00 | 0.00 | H |
| ATOM | 1761 | C    | GLY | 114 | 30.449 | 42.426 | 36.581 | 1.00 | 0.00 | C |
| ATOM | 1762 | O    | GLY | 114 | 31.297 | 42.514 | 37.471 | 1.00 | 0.00 | O |
| ATOM | 1763 | N    | VAL | 115 | 30.341 | 41.372 | 35.769 | 1.00 | 0.00 | N |
| ATOM | 1764 | H    | VAL | 115 | 29.617 | 41.393 | 35.067 | 1.00 | 0.00 | H |
| ATOM | 1765 | CA   | VAL | 115 | 31.268 | 40.231 | 35.727 | 1.00 | 0.00 | C |
| ATOM | 1766 | HA   | VAL | 115 | 31.425 | 39.884 | 36.744 | 1.00 | 0.00 | H |

|      |      |      |     |     |        |        |        |      |      |   |
|------|------|------|-----|-----|--------|--------|--------|------|------|---|
| ATOM | 1767 | CB   | VAL | 115 | 30.646 | 39.074 | 34.913 | 1.00 | 0.00 | C |
| ATOM | 1768 | HB   | VAL | 115 | 30.414 | 39.431 | 33.909 | 1.00 | 0.00 | H |
| ATOM | 1769 | CG1  | VAL | 115 | 31.584 | 37.868 | 34.792 | 1.00 | 0.00 | C |
| ATOM | 1770 | HG11 | VAL | 115 | 31.877 | 37.533 | 35.784 | 1.00 | 0.00 | H |
| ATOM | 1771 | HG12 | VAL | 115 | 31.077 | 37.060 | 34.265 | 1.00 | 0.00 | H |
| ATOM | 1772 | HG13 | VAL | 115 | 32.469 | 38.132 | 34.212 | 1.00 | 0.00 | H |
| ATOM | 1773 | CG2  | VAL | 115 | 29.345 | 38.572 | 35.559 | 1.00 | 0.00 | C |
| ATOM | 1774 | HG21 | VAL | 115 | 28.609 | 39.374 | 35.612 | 1.00 | 0.00 | H |
| ATOM | 1775 | HG22 | VAL | 115 | 29.545 | 38.192 | 36.560 | 1.00 | 0.00 | H |
| ATOM | 1776 | HG23 | VAL | 115 | 28.917 | 37.773 | 34.950 | 1.00 | 0.00 | H |
| ATOM | 1777 | C    | VAL | 115 | 32.624 | 40.642 | 35.131 | 1.00 | 0.00 | C |
| ATOM | 1778 | O    | VAL | 115 | 32.660 | 41.332 | 34.116 | 1.00 | 0.00 | O |
| ATOM | 1779 | N    | PHE | 116 | 33.735 | 40.188 | 35.722 | 1.00 | 0.00 | N |
| ATOM | 1780 | H    | PHE | 116 | 33.636 | 39.676 | 36.592 | 1.00 | 0.00 | H |
| ATOM | 1781 | CA   | PHE | 116 | 35.086 | 40.335 | 35.160 | 1.00 | 0.00 | C |
| ATOM | 1782 | HA   | PHE | 116 | 35.000 | 40.245 | 34.075 | 1.00 | 0.00 | H |
| ATOM | 1783 | CB   | PHE | 116 | 35.641 | 41.741 | 35.467 | 1.00 | 0.00 | C |
| ATOM | 1784 | HB2  | PHE | 116 | 36.293 | 42.020 | 34.638 | 1.00 | 0.00 | H |
| ATOM | 1785 | HB3  | PHE | 116 | 34.828 | 42.469 | 35.476 | 1.00 | 0.00 | H |
| ATOM | 1786 | CG   | PHE | 116 | 36.432 | 41.871 | 36.760 | 1.00 | 0.00 | C |
| ATOM | 1787 | CD1  | PHE | 116 | 37.807 | 42.166 | 36.709 | 1.00 | 0.00 | C |
| ATOM | 1788 | HD1  | PHE | 116 | 38.287 | 42.312 | 35.754 | 1.00 | 0.00 | H |
| ATOM | 1789 | CE1  | PHE | 116 | 38.552 | 42.295 | 37.896 | 1.00 | 0.00 | C |
| ATOM | 1790 | HE1  | PHE | 116 | 39.600 | 42.550 | 37.853 | 1.00 | 0.00 | H |
| ATOM | 1791 | CZ   | PHE | 116 | 37.931 | 42.104 | 39.140 | 1.00 | 0.00 | C |
| ATOM | 1792 | HZ   | PHE | 116 | 38.507 | 42.194 | 40.052 | 1.00 | 0.00 | H |
| ATOM | 1793 | CE2  | PHE | 116 | 36.560 | 41.805 | 39.194 | 1.00 | 0.00 | C |
| ATOM | 1794 | HE2  | PHE | 116 | 36.081 | 41.666 | 40.153 | 1.00 | 0.00 | H |
| ATOM | 1795 | CD2  | PHE | 116 | 35.807 | 41.698 | 38.009 | 1.00 | 0.00 | C |
| ATOM | 1796 | HD2  | PHE | 116 | 34.749 | 41.479 | 38.056 | 1.00 | 0.00 | H |
| ATOM | 1797 | C    | PHE | 116 | 36.051 | 39.231 | 35.641 | 1.00 | 0.00 | C |
| ATOM | 1798 | O    | PHE | 116 | 35.863 | 38.642 | 36.710 | 1.00 | 0.00 | O |
| ATOM | 1799 | N    | GLY | 117 | 37.107 | 38.956 | 34.872 | 1.00 | 0.00 | N |
| ATOM | 1800 | H    | GLY | 117 | 37.197 | 39.432 | 33.984 | 1.00 | 0.00 | H |
| ATOM | 1801 | CA   | GLY | 117 | 38.134 | 37.953 | 35.184 | 1.00 | 0.00 | C |
| ATOM | 1802 | HA2  | GLY | 117 | 39.002 | 38.443 | 35.626 | 1.00 | 0.00 | H |
| ATOM | 1803 | HA3  | GLY | 117 | 37.750 | 37.223 | 35.897 | 1.00 | 0.00 | H |
| ATOM | 1804 | C    | GLY | 117 | 38.586 | 37.221 | 33.923 | 1.00 | 0.00 | C |
| ATOM | 1805 | O    | GLY | 117 | 38.863 | 37.863 | 32.913 | 1.00 | 0.00 | O |
| ATOM | 1806 | N    | CYS | 118 | 38.610 | 35.888 | 33.975 | 1.00 | 0.00 | N |
| ATOM | 1807 | H    | CYS | 118 | 38.370 | 35.430 | 34.847 | 1.00 | 0.00 | H |
| ATOM | 1808 | CA   | CYS | 118 | 38.744 | 35.019 | 32.802 | 1.00 | 0.00 | C |
| ATOM | 1809 | HA   | CYS | 118 | 38.512 | 35.591 | 31.900 | 1.00 | 0.00 | H |
| ATOM | 1810 | CB   | CYS | 118 | 40.191 | 34.520 | 32.686 | 1.00 | 0.00 | C |
| ATOM | 1811 | HB2  | CYS | 118 | 40.307 | 33.979 | 31.744 | 1.00 | 0.00 | H |
| ATOM | 1812 | HB3  | CYS | 118 | 40.872 | 35.373 | 32.679 | 1.00 | 0.00 | H |
| ATOM | 1813 | SG   | CYS | 118 | 40.596 | 33.412 | 34.068 | 1.00 | 0.00 | S |
| ATOM | 1814 | HG   | CYS | 118 | 41.109 | 34.368 | 34.860 | 1.00 | 0.00 | H |
| ATOM | 1815 | C    | CYS | 118 | 37.740 | 33.855 | 32.872 | 1.00 | 0.00 | C |
| ATOM | 1816 | O    | CYS | 118 | 37.129 | 33.597 | 33.912 | 1.00 | 0.00 | O |
| ATOM | 1817 | N    | SER | 119 | 37.604 | 33.101 | 31.781 | 1.00 | 0.00 | N |
| ATOM | 1818 | H    | SER | 119 | 38.148 | 33.358 | 30.957 | 1.00 | 0.00 | H |

|      |      |     |     |     |        |        |        |      |      |   |
|------|------|-----|-----|-----|--------|--------|--------|------|------|---|
| ATOM | 1819 | CA  | SER | 119 | 36.617 | 32.018 | 31.619 | 1.00 | 0.00 | C |
| ATOM | 1820 | HA  | SER | 119 | 35.616 | 32.443 | 31.698 | 1.00 | 0.00 | H |
| ATOM | 1821 | CB  | SER | 119 | 36.769 | 31.402 | 30.223 | 1.00 | 0.00 | C |
| ATOM | 1822 | HB2 | SER | 119 | 37.736 | 30.902 | 30.145 | 1.00 | 0.00 | H |
| ATOM | 1823 | HB3 | SER | 119 | 35.983 | 30.661 | 30.078 | 1.00 | 0.00 | H |
| ATOM | 1824 | OG  | SER | 119 | 36.682 | 32.400 | 29.217 | 1.00 | 0.00 | O |
| ATOM | 1825 | HG  | SER | 119 | 37.582 | 32.828 | 29.178 | 1.00 | 0.00 | H |
| ATOM | 1826 | C   | SER | 119 | 36.728 | 30.892 | 32.660 | 1.00 | 0.00 | C |
| ATOM | 1827 | O   | SER | 119 | 35.757 | 30.168 | 32.897 | 1.00 | 0.00 | O |
| ATOM | 1828 | N   | LYS | 120 | 37.907 | 30.742 | 33.283 | 1.00 | 0.00 | N |
| ATOM | 1829 | H   | LYS | 120 | 38.639 | 31.387 | 33.013 | 1.00 | 0.00 | H |
| ATOM | 1830 | CA  | LYS | 120 | 38.220 | 29.751 | 34.329 | 1.00 | 0.00 | C |
| ATOM | 1831 | HA  | LYS | 120 | 37.642 | 28.842 | 34.149 | 1.00 | 0.00 | H |
| ATOM | 1832 | CB  | LYS | 120 | 39.724 | 29.403 | 34.268 | 1.00 | 0.00 | C |
| ATOM | 1833 | HB2 | LYS | 120 | 40.298 | 30.259 | 34.628 | 1.00 | 0.00 | H |
| ATOM | 1834 | HB3 | LYS | 120 | 39.911 | 28.566 | 34.944 | 1.00 | 0.00 | H |
| ATOM | 1835 | CG  | LYS | 120 | 40.241 | 29.031 | 32.863 | 1.00 | 0.00 | C |
| ATOM | 1836 | HG2 | LYS | 120 | 39.659 | 28.198 | 32.466 | 1.00 | 0.00 | H |
| ATOM | 1837 | HG3 | LYS | 120 | 40.129 | 29.889 | 32.199 | 1.00 | 0.00 | H |
| ATOM | 1838 | CD  | LYS | 120 | 41.726 | 28.641 | 32.901 | 1.00 | 0.00 | C |
| ATOM | 1839 | HD2 | LYS | 120 | 42.281 | 29.393 | 33.468 | 1.00 | 0.00 | H |
| ATOM | 1840 | HD3 | LYS | 120 | 41.837 | 27.675 | 33.396 | 1.00 | 0.00 | H |
| ATOM | 1841 | CE  | LYS | 120 | 42.309 | 28.572 | 31.483 | 1.00 | 0.00 | C |
| ATOM | 1842 | HE2 | LYS | 120 | 41.756 | 27.838 | 30.887 | 1.00 | 0.00 | H |
| ATOM | 1843 | HE3 | LYS | 120 | 42.193 | 29.553 | 31.015 | 1.00 | 0.00 | H |
| ATOM | 1844 | NZ  | LYS | 120 | 43.743 | 28.215 | 31.517 | 1.00 | 0.00 | N |
| ATOM | 1845 | HZ1 | LYS | 120 | 43.888 | 27.219 | 31.666 | 1.00 | 0.00 | H |
| ATOM | 1846 | HZ2 | LYS | 120 | 44.235 | 28.718 | 32.251 | 1.00 | 0.00 | H |
| ATOM | 1847 | HZ3 | LYS | 120 | 44.214 | 28.443 | 30.644 | 1.00 | 0.00 | H |
| ATOM | 1848 | C   | LYS | 120 | 37.865 | 30.231 | 35.747 | 1.00 | 0.00 | C |
| ATOM | 1849 | O   | LYS | 120 | 37.611 | 29.407 | 36.625 | 1.00 | 0.00 | O |
| ATOM | 1850 | N   | LYS | 121 | 37.880 | 31.553 | 35.976 | 1.00 | 0.00 | N |
| ATOM | 1851 | H   | LYS | 121 | 38.045 | 32.151 | 35.174 | 1.00 | 0.00 | H |
| ATOM | 1852 | CA  | LYS | 121 | 37.634 | 32.218 | 37.266 | 1.00 | 0.00 | C |
| ATOM | 1853 | HA  | LYS | 121 | 36.816 | 31.697 | 37.766 | 1.00 | 0.00 | H |
| ATOM | 1854 | CB  | LYS | 121 | 38.888 | 32.097 | 38.162 | 1.00 | 0.00 | C |
| ATOM | 1855 | HB2 | LYS | 121 | 38.994 | 31.055 | 38.469 | 1.00 | 0.00 | H |
| ATOM | 1856 | HB3 | LYS | 121 | 39.769 | 32.354 | 37.569 | 1.00 | 0.00 | H |
| ATOM | 1857 | CG  | LYS | 121 | 38.907 | 32.982 | 39.424 | 1.00 | 0.00 | C |
| ATOM | 1858 | HG2 | LYS | 121 | 39.788 | 32.719 | 40.012 | 1.00 | 0.00 | H |
| ATOM | 1859 | HG3 | LYS | 121 | 39.033 | 34.019 | 39.109 | 1.00 | 0.00 | H |
| ATOM | 1860 | CD  | LYS | 121 | 37.668 | 32.893 | 40.334 | 1.00 | 0.00 | C |
| ATOM | 1861 | HD2 | LYS | 121 | 36.765 | 33.041 | 39.744 | 1.00 | 0.00 | H |
| ATOM | 1862 | HD3 | LYS | 121 | 37.620 | 31.917 | 40.818 | 1.00 | 0.00 | H |
| ATOM | 1863 | CE  | LYS | 121 | 37.766 | 34.007 | 41.385 | 1.00 | 0.00 | C |
| ATOM | 1864 | HE2 | LYS | 121 | 38.435 | 33.700 | 42.194 | 1.00 | 0.00 | H |
| ATOM | 1865 | HE3 | LYS | 121 | 38.207 | 34.883 | 40.904 | 1.00 | 0.00 | H |
| ATOM | 1866 | NZ  | LYS | 121 | 36.448 | 34.408 | 41.928 | 1.00 | 0.00 | N |
| ATOM | 1867 | HZ1 | LYS | 121 | 36.532 | 35.324 | 42.355 | 1.00 | 0.00 | H |
| ATOM | 1868 | HZ2 | LYS | 121 | 36.126 | 33.803 | 42.680 | 1.00 | 0.00 | H |
| ATOM | 1869 | HZ3 | LYS | 121 | 35.750 | 34.496 | 41.193 | 1.00 | 0.00 | H |
| ATOM | 1870 | C   | LYS | 121 | 37.206 | 33.672 | 37.034 | 1.00 | 0.00 | C |

|      |      |      |     |     |        |        |        |      |      |   |
|------|------|------|-----|-----|--------|--------|--------|------|------|---|
| ATOM | 1871 | O    | LYS | 121 | 38.017 | 34.552 | 36.738 | 1.00 | 0.00 | O |
| ATOM | 1872 | N    | LEU | 122 | 35.912 | 33.907 | 37.233 | 1.00 | 0.00 | N |
| ATOM | 1873 | H    | LEU | 122 | 35.328 | 33.118 | 37.456 | 1.00 | 0.00 | H |
| ATOM | 1874 | CA   | LEU | 122 | 35.266 | 35.217 | 37.182 | 1.00 | 0.00 | C |
| ATOM | 1875 | HA   | LEU | 122 | 35.978 | 35.936 | 36.773 | 1.00 | 0.00 | H |
| ATOM | 1876 | CB   | LEU | 122 | 34.093 | 35.158 | 36.183 | 1.00 | 0.00 | C |
| ATOM | 1877 | HB2  | LEU | 122 | 33.665 | 36.153 | 36.079 | 1.00 | 0.00 | H |
| ATOM | 1878 | HB3  | LEU | 122 | 34.528 | 34.905 | 35.213 | 1.00 | 0.00 | H |
| ATOM | 1879 | CG   | LEU | 122 | 32.968 | 34.143 | 36.484 | 1.00 | 0.00 | C |
| ATOM | 1880 | HG   | LEU | 122 | 33.401 | 33.203 | 36.825 | 1.00 | 0.00 | H |
| ATOM | 1881 | CD1  | LEU | 122 | 31.974 | 34.637 | 37.540 | 1.00 | 0.00 | C |
| ATOM | 1882 | HD11 | LEU | 122 | 32.461 | 34.728 | 38.508 | 1.00 | 0.00 | H |
| ATOM | 1883 | HD12 | LEU | 122 | 31.166 | 33.912 | 37.642 | 1.00 | 0.00 | H |
| ATOM | 1884 | HD13 | LEU | 122 | 31.557 | 35.599 | 37.246 | 1.00 | 0.00 | H |
| ATOM | 1885 | CD2  | LEU | 122 | 32.183 | 33.854 | 35.205 | 1.00 | 0.00 | C |
| ATOM | 1886 | HD21 | LEU | 122 | 31.692 | 34.757 | 34.845 | 1.00 | 0.00 | H |
| ATOM | 1887 | HD22 | LEU | 122 | 32.856 | 33.480 | 34.433 | 1.00 | 0.00 | H |
| ATOM | 1888 | HD23 | LEU | 122 | 31.437 | 33.084 | 35.398 | 1.00 | 0.00 | H |
| ATOM | 1889 | C    | LEU | 122 | 34.901 | 35.738 | 38.583 | 1.00 | 0.00 | C |
| ATOM | 1890 | O    | LEU | 122 | 34.966 | 35.017 | 39.583 | 1.00 | 0.00 | O |
| ATOM | 1891 | N    | ASN | 123 | 34.554 | 37.019 | 38.642 | 1.00 | 0.00 | N |
| ATOM | 1892 | H    | ASN | 123 | 34.562 | 37.539 | 37.770 | 1.00 | 0.00 | H |
| ATOM | 1893 | CA   | ASN | 123 | 34.307 | 37.823 | 39.838 | 1.00 | 0.00 | C |
| ATOM | 1894 | HA   | ASN | 123 | 33.955 | 37.182 | 40.645 | 1.00 | 0.00 | H |
| ATOM | 1895 | CB   | ASN | 123 | 35.614 | 38.525 | 40.265 | 1.00 | 0.00 | C |
| ATOM | 1896 | HB2  | ASN | 123 | 35.748 | 39.392 | 39.627 | 1.00 | 0.00 | H |
| ATOM | 1897 | HB3  | ASN | 123 | 35.525 | 38.870 | 41.294 | 1.00 | 0.00 | H |
| ATOM | 1898 | CG   | ASN | 123 | 36.873 | 37.688 | 40.137 | 1.00 | 0.00 | C |
| ATOM | 1899 | OD1  | ASN | 123 | 37.289 | 37.003 | 41.057 | 1.00 | 0.00 | O |
| ATOM | 1900 | ND2  | ASN | 123 | 37.500 | 37.694 | 38.981 | 1.00 | 0.00 | N |
| ATOM | 1901 | HD21 | ASN | 123 | 37.098 | 38.215 | 38.207 | 1.00 | 0.00 | H |
| ATOM | 1902 | HD22 | ASN | 123 | 38.298 | 37.099 | 38.870 | 1.00 | 0.00 | H |
| ATOM | 1903 | C    | ASN | 123 | 33.232 | 38.875 | 39.504 | 1.00 | 0.00 | C |
| ATOM | 1904 | O    | ASN | 123 | 33.041 | 39.172 | 38.324 | 1.00 | 0.00 | O |
| ATOM | 1905 | N    | TYR | 124 | 32.576 | 39.486 | 40.495 | 1.00 | 0.00 | N |
| ATOM | 1906 | H    | TYR | 124 | 32.722 | 39.172 | 41.446 | 1.00 | 0.00 | H |
| ATOM | 1907 | CA   | TYR | 124 | 31.588 | 40.554 | 40.262 | 1.00 | 0.00 | C |
| ATOM | 1908 | HA   | TYR | 124 | 31.599 | 40.832 | 39.210 | 1.00 | 0.00 | H |
| ATOM | 1909 | CB   | TYR | 124 | 30.186 | 40.013 | 40.566 | 1.00 | 0.00 | C |
| ATOM | 1910 | HB2  | TYR | 124 | 30.083 | 39.032 | 40.099 | 1.00 | 0.00 | H |
| ATOM | 1911 | HB3  | TYR | 124 | 30.076 | 39.870 | 41.642 | 1.00 | 0.00 | H |
| ATOM | 1912 | CG   | TYR | 124 | 29.063 | 40.899 | 40.063 | 1.00 | 0.00 | C |
| ATOM | 1913 | CD1  | TYR | 124 | 28.650 | 42.029 | 40.797 | 1.00 | 0.00 | C |
| ATOM | 1914 | HD1  | TYR | 124 | 29.155 | 42.283 | 41.718 | 1.00 | 0.00 | H |
| ATOM | 1915 | CE1  | TYR | 124 | 27.585 | 42.824 | 40.326 | 1.00 | 0.00 | C |
| ATOM | 1916 | HE1  | TYR | 124 | 27.253 | 43.690 | 40.877 | 1.00 | 0.00 | H |
| ATOM | 1917 | CZ   | TYR | 124 | 26.929 | 42.487 | 39.123 | 1.00 | 0.00 | C |
| ATOM | 1918 | OH   | TYR | 124 | 25.879 | 43.235 | 38.692 | 1.00 | 0.00 | O |
| ATOM | 1919 | HH   | TYR | 124 | 25.317 | 42.738 | 38.077 | 1.00 | 0.00 | H |
| ATOM | 1920 | CE2  | TYR | 124 | 27.365 | 41.371 | 38.377 | 1.00 | 0.00 | C |
| ATOM | 1921 | HE2  | TYR | 124 | 26.888 | 41.120 | 37.444 | 1.00 | 0.00 | H |
| ATOM | 1922 | CD2  | TYR | 124 | 28.428 | 40.582 | 38.847 | 1.00 | 0.00 | C |



|      |      |          |     |        |        |        |      |      |   |
|------|------|----------|-----|--------|--------|--------|------|------|---|
| ATOM | 1923 | HD2 TYR  | 124 | 28.751 | 39.724 | 38.275 | 1.00 | 0.00 | H |
| ATOM | 1924 | C TYR    | 124 | 31.906 | 41.821 | 41.073 | 1.00 | 0.00 | C |
| ATOM | 1925 | O TYR    | 124 | 31.884 | 41.783 | 42.303 | 1.00 | 0.00 | O |
| ATOM | 1926 | N THR    | 125 | 32.193 | 42.949 | 40.409 | 1.00 | 0.00 | N |
| ATOM | 1927 | H THR    | 125 | 32.106 | 42.954 | 39.395 | 1.00 | 0.00 | H |
| ATOM | 1928 | CA THR   | 125 | 32.555 | 44.219 | 41.079 | 1.00 | 0.00 | C |
| ATOM | 1929 | HA THR   | 125 | 31.897 | 44.344 | 41.938 | 1.00 | 0.00 | H |
| ATOM | 1930 | CB THR   | 125 | 33.997 | 44.148 | 41.632 | 1.00 | 0.00 | C |
| ATOM | 1931 | HB THR   | 125 | 34.156 | 43.172 | 42.093 | 1.00 | 0.00 | H |
| ATOM | 1932 | CG2 THR  | 125 | 35.080 | 44.379 | 40.580 | 1.00 | 0.00 | C |
| ATOM | 1933 | HG21 THR | 125 | 36.044 | 44.054 | 40.970 | 1.00 | 0.00 | H |
| ATOM | 1934 | HG22 THR | 125 | 35.149 | 45.432 | 40.314 | 1.00 | 0.00 | H |
| ATOM | 1935 | HG23 THR | 125 | 34.843 | 43.813 | 39.681 | 1.00 | 0.00 | H |
| ATOM | 1936 | OG1 THR  | 125 | 34.182 | 45.138 | 42.621 | 1.00 | 0.00 | O |
| ATOM | 1937 | HG1 THR  | 125 | 35.101 | 45.087 | 42.900 | 1.00 | 0.00 | H |
| ATOM | 1938 | C THR    | 125 | 32.351 | 45.454 | 40.183 | 1.00 | 0.00 | C |
| ATOM | 1939 | O THR    | 125 | 31.885 | 45.339 | 39.048 | 1.00 | 0.00 | O |
| ATOM | 1940 | N ALA    | 126 | 32.681 | 46.641 | 40.702 | 1.00 | 0.00 | N |
| ATOM | 1941 | H ALA    | 126 | 33.116 | 46.623 | 41.616 | 1.00 | 0.00 | H |
| ATOM | 1942 | CA ALA   | 126 | 32.739 | 47.907 | 39.969 | 1.00 | 0.00 | C |
| ATOM | 1943 | HA ALA   | 126 | 32.127 | 47.822 | 39.076 | 1.00 | 0.00 | H |
| ATOM | 1944 | CB ALA   | 126 | 32.152 | 49.011 | 40.852 | 1.00 | 0.00 | C |
| ATOM | 1945 | HB1 ALA  | 126 | 32.093 | 49.939 | 40.284 | 1.00 | 0.00 | H |
| ATOM | 1946 | HB2 ALA  | 126 | 32.796 | 49.171 | 41.717 | 1.00 | 0.00 | H |
| ATOM | 1947 | HB3 ALA  | 126 | 31.151 | 48.733 | 41.185 | 1.00 | 0.00 | H |
| ATOM | 1948 | C ALA    | 126 | 34.177 | 48.269 | 39.546 | 1.00 | 0.00 | C |
| ATOM | 1949 | O ALA    | 126 | 35.113 | 48.041 | 40.315 | 1.00 | 0.00 | O |
| ATOM | 1950 | N ILE    | 127 | 34.357 | 48.869 | 38.361 | 1.00 | 0.00 | N |
| ATOM | 1951 | H ILE    | 127 | 33.533 | 49.025 | 37.785 | 1.00 | 0.00 | H |
| ATOM | 1952 | CA ILE   | 127 | 35.666 | 49.253 | 37.797 | 1.00 | 0.00 | C |
| ATOM | 1953 | HA ILE   | 127 | 36.363 | 49.399 | 38.619 | 1.00 | 0.00 | H |
| ATOM | 1954 | CB ILE   | 127 | 36.227 | 48.130 | 36.879 | 1.00 | 0.00 | C |
| ATOM | 1955 | HB ILE   | 127 | 35.558 | 48.029 | 36.023 | 1.00 | 0.00 | H |
| ATOM | 1956 | CG2 ILE  | 127 | 37.618 | 48.529 | 36.344 | 1.00 | 0.00 | C |
| ATOM | 1957 | HG21 ILE | 127 | 37.557 | 49.449 | 35.766 | 1.00 | 0.00 | H |
| ATOM | 1958 | HG22 ILE | 127 | 38.007 | 47.763 | 35.673 | 1.00 | 0.00 | H |
| ATOM | 1959 | HG23 ILE | 127 | 38.318 | 48.671 | 37.167 | 1.00 | 0.00 | H |
| ATOM | 1960 | CG1 ILE  | 127 | 36.273 | 46.757 | 37.596 | 1.00 | 0.00 | C |
| ATOM | 1961 | HG12 ILE | 127 | 36.851 | 46.844 | 38.514 | 1.00 | 0.00 | H |
| ATOM | 1962 | HG13 ILE | 127 | 35.258 | 46.463 | 37.859 | 1.00 | 0.00 | H |
| ATOM | 1963 | CD1 ILE  | 127 | 36.851 | 45.597 | 36.785 | 1.00 | 0.00 | C |
| ATOM | 1964 | HD11 ILE | 127 | 36.367 | 45.541 | 35.810 | 1.00 | 0.00 | H |
| ATOM | 1965 | HD12 ILE | 127 | 36.668 | 44.671 | 37.326 | 1.00 | 0.00 | H |
| ATOM | 1966 | HD13 ILE | 127 | 37.927 | 45.718 | 36.667 | 1.00 | 0.00 | H |
| ATOM | 1967 | C ILE    | 127 | 35.570 | 50.590 | 37.038 | 1.00 | 0.00 | C |
| ATOM | 1968 | O ILE    | 127 | 34.745 | 50.722 | 36.135 | 1.00 | 0.00 | O |
| ATOM | 1969 | N SER    | 128 | 36.427 | 51.565 | 37.382 | 1.00 | 0.00 | N |
| ATOM | 1970 | H SER    | 128 | 37.034 | 51.412 | 38.175 | 1.00 | 0.00 | H |
| ATOM | 1971 | CA SER   | 128 | 36.704 | 52.797 | 36.611 | 1.00 | 0.00 | C |
| ATOM | 1972 | HA SER   | 128 | 37.046 | 52.526 | 35.612 | 1.00 | 0.00 | H |
| ATOM | 1973 | CB SER   | 128 | 35.449 | 53.674 | 36.474 | 1.00 | 0.00 | C |
| ATOM | 1974 | HB2 SER  | 128 | 35.647 | 54.484 | 35.771 | 1.00 | 0.00 | H |

|      |      |      |     |     |        |        |        |      |      |   |
|------|------|------|-----|-----|--------|--------|--------|------|------|---|
| ATOM | 1975 | HB3  | SER | 128 | 34.640 | 53.086 | 36.057 | 1.00 | 0.00 | H |
| ATOM | 1976 | OG   | SER | 128 | 35.068 | 54.234 | 37.717 | 1.00 | 0.00 | O |
| ATOM | 1977 | HG   | SER | 128 | 34.270 | 54.784 | 37.546 | 1.00 | 0.00 | H |
| ATOM | 1978 | C    | SER | 128 | 37.783 | 53.669 | 37.275 | 1.00 | 0.00 | C |
| ATOM | 1979 | O    | SER | 128 | 38.256 | 53.371 | 38.377 | 1.00 | 0.00 | O |
| ATOM | 1980 | N    | ASP | 129 | 38.075 | 54.816 | 36.647 | 1.00 | 0.00 | N |
| ATOM | 1981 | H    | ASP | 129 | 37.693 | 54.961 | 35.721 | 1.00 | 0.00 | H |
| ATOM | 1982 | CA   | ASP | 129 | 38.843 | 55.938 | 37.207 | 1.00 | 0.00 | C |
| ATOM | 1983 | HA   | ASP | 129 | 39.893 | 55.651 | 37.227 | 1.00 | 0.00 | H |
| ATOM | 1984 | CB   | ASP | 129 | 38.693 | 57.134 | 36.240 | 1.00 | 0.00 | C |
| ATOM | 1985 | HB2  | ASP | 129 | 38.888 | 56.790 | 35.223 | 1.00 | 0.00 | H |
| ATOM | 1986 | HB3  | ASP | 129 | 37.665 | 57.501 | 36.281 | 1.00 | 0.00 | H |
| ATOM | 1987 | CG   | ASP | 129 | 39.653 | 58.291 | 36.536 | 1.00 | 0.00 | C |
| ATOM | 1988 | OD1  | ASP | 129 | 40.608 | 58.107 | 37.318 | 1.00 | 0.00 | O |
| ATOM | 1989 | OD2  | ASP | 129 | 39.485 | 59.421 | 36.004 | 1.00 | 0.00 | O |
| ATOM | 1990 | C    | ASP | 129 | 38.416 | 56.338 | 38.645 | 1.00 | 0.00 | C |
| ATOM | 1991 | O    | ASP | 129 | 39.239 | 56.759 | 39.458 | 1.00 | 0.00 | O |
| ATOM | 1992 | N    | THR | 130 | 37.147 | 56.143 | 39.031 | 1.00 | 0.00 | N |
| ATOM | 1993 | H    | THR | 130 | 36.494 | 55.733 | 38.375 | 1.00 | 0.00 | H |
| ATOM | 1994 | CA   | THR | 130 | 36.696 | 56.453 | 40.401 | 1.00 | 0.00 | C |
| ATOM | 1995 | HA   | THR | 130 | 36.883 | 57.510 | 40.590 | 1.00 | 0.00 | H |
| ATOM | 1996 | CB   | THR | 130 | 35.186 | 56.209 | 40.572 | 1.00 | 0.00 | C |
| ATOM | 1997 | HB   | THR | 130 | 34.954 | 55.161 | 40.377 | 1.00 | 0.00 | H |
| ATOM | 1998 | CG2  | THR | 130 | 34.717 | 56.576 | 41.980 | 1.00 | 0.00 | C |
| ATOM | 1999 | HG21 | THR | 130 | 33.668 | 56.315 | 42.086 | 1.00 | 0.00 | H |
| ATOM | 2000 | HG22 | THR | 130 | 34.860 | 57.641 | 42.145 | 1.00 | 0.00 | H |
| ATOM | 2001 | HG23 | THR | 130 | 35.269 | 56.028 | 42.739 | 1.00 | 0.00 | H |
| ATOM | 2002 | OG1  | THR | 130 | 34.438 | 57.033 | 39.701 | 1.00 | 0.00 | O |
| ATOM | 2003 | HG1  | THR | 130 | 34.220 | 56.538 | 38.897 | 1.00 | 0.00 | H |
| ATOM | 2004 | C    | THR | 130 | 37.479 | 55.661 | 41.457 | 1.00 | 0.00 | C |
| ATOM | 2005 | O    | THR | 130 | 37.866 | 56.218 | 42.486 | 1.00 | 0.00 | O |
| ATOM | 2006 | N    | VAL | 131 | 37.740 | 54.371 | 41.211 | 1.00 | 0.00 | N |
| ATOM | 2007 | H    | VAL | 131 | 37.495 | 53.995 | 40.301 | 1.00 | 0.00 | H |
| ATOM | 2008 | CA   | VAL | 131 | 38.438 | 53.496 | 42.171 | 1.00 | 0.00 | C |
| ATOM | 2009 | HA   | VAL | 131 | 38.146 | 53.804 | 43.172 | 1.00 | 0.00 | H |
| ATOM | 2010 | CB   | VAL | 131 | 38.035 | 52.019 | 42.001 | 1.00 | 0.00 | C |
| ATOM | 2011 | HB   | VAL | 131 | 38.597 | 51.611 | 41.168 | 1.00 | 0.00 | H |
| ATOM | 2012 | CG1  | VAL | 131 | 38.391 | 51.246 | 43.278 | 1.00 | 0.00 | C |
| ATOM | 2013 | HG11 | VAL | 131 | 39.471 | 51.216 | 43.412 | 1.00 | 0.00 | H |
| ATOM | 2014 | HG12 | VAL | 131 | 37.958 | 51.715 | 44.156 | 1.00 | 0.00 | H |
| ATOM | 2015 | HG13 | VAL | 131 | 38.009 | 50.232 | 43.221 | 1.00 | 0.00 | H |
| ATOM | 2016 | CG2  | VAL | 131 | 36.550 | 51.783 | 41.679 | 1.00 | 0.00 | C |
| ATOM | 2017 | HG21 | VAL | 131 | 35.918 | 52.208 | 42.453 | 1.00 | 0.00 | H |
| ATOM | 2018 | HG22 | VAL | 131 | 36.354 | 50.712 | 41.612 | 1.00 | 0.00 | H |
| ATOM | 2019 | HG23 | VAL | 131 | 36.294 | 52.229 | 40.718 | 1.00 | 0.00 | H |
| ATOM | 2020 | C    | VAL | 131 | 39.962 | 53.659 | 42.095 | 1.00 | 0.00 | C |
| ATOM | 2021 | O    | VAL | 131 | 40.644 | 53.581 | 43.116 | 1.00 | 0.00 | O |
| ATOM | 2022 | N    | ASN | 132 | 40.485 | 53.986 | 40.909 | 1.00 | 0.00 | N |
| ATOM | 2023 | H    | ASN | 132 | 39.864 | 54.009 | 40.110 | 1.00 | 0.00 | H |
| ATOM | 2024 | CA   | ASN | 132 | 41.860 | 54.456 | 40.710 | 1.00 | 0.00 | C |
| ATOM | 2025 | HA   | ASN | 132 | 42.557 | 53.665 | 40.980 | 1.00 | 0.00 | H |
| ATOM | 2026 | CB   | ASN | 132 | 42.005 | 54.795 | 39.214 | 1.00 | 0.00 | C |

|      |      |          |     |        |        |        |      |      |   |
|------|------|----------|-----|--------|--------|--------|------|------|---|
| ATOM | 2027 | HB2 ASN  | 132 | 41.915 | 53.885 | 38.623 | 1.00 | 0.00 | H |
| ATOM | 2028 | HB3 ASN  | 132 | 41.190 | 55.444 | 38.927 | 1.00 | 0.00 | H |
| ATOM | 2029 | CG ASN   | 132 | 43.281 | 55.505 | 38.799 | 1.00 | 0.00 | C |
| ATOM | 2030 | OD1 ASN  | 132 | 44.336 | 55.406 | 39.410 | 1.00 | 0.00 | O |
| ATOM | 2031 | ND2 ASN  | 132 | 43.226 | 56.260 | 37.731 | 1.00 | 0.00 | N |
| ATOM | 2032 | HD21 ASN | 132 | 42.348 | 56.402 | 37.240 | 1.00 | 0.00 | H |
| ATOM | 2033 | HD22 ASN | 132 | 44.082 | 56.402 | 37.223 | 1.00 | 0.00 | H |
| ATOM | 2034 | C ASN    | 132 | 42.166 | 55.661 | 41.613 | 1.00 | 0.00 | C |
| ATOM | 2035 | O ASN    | 132 | 43.117 | 55.632 | 42.398 | 1.00 | 0.00 | O |
| ATOM | 2036 | N VAL    | 133 | 41.315 | 56.694 | 41.569 | 1.00 | 0.00 | N |
| ATOM | 2037 | H VAL    | 133 | 40.553 | 56.673 | 40.895 | 1.00 | 0.00 | H |
| ATOM | 2038 | CA VAL   | 133 | 41.465 | 57.860 | 42.447 | 1.00 | 0.00 | C |
| ATOM | 2039 | HA VAL   | 133 | 42.499 | 58.195 | 42.368 | 1.00 | 0.00 | H |
| ATOM | 2040 | CB VAL   | 133 | 40.579 | 59.040 | 42.003 | 1.00 | 0.00 | C |
| ATOM | 2041 | HB VAL   | 133 | 39.530 | 58.743 | 42.033 | 1.00 | 0.00 | H |
| ATOM | 2042 | CG1 VAL  | 133 | 40.782 | 60.273 | 42.892 | 1.00 | 0.00 | C |
| ATOM | 2043 | HG11 VAL | 133 | 41.831 | 60.569 | 42.896 | 1.00 | 0.00 | H |
| ATOM | 2044 | HG12 VAL | 133 | 40.174 | 61.102 | 42.529 | 1.00 | 0.00 | H |
| ATOM | 2045 | HG13 VAL | 133 | 40.482 | 60.046 | 43.912 | 1.00 | 0.00 | H |
| ATOM | 2046 | CG2 VAL  | 133 | 40.938 | 59.500 | 40.582 | 1.00 | 0.00 | C |
| ATOM | 2047 | HG21 VAL | 133 | 41.974 | 59.837 | 40.552 | 1.00 | 0.00 | H |
| ATOM | 2048 | HG22 VAL | 133 | 40.269 | 60.307 | 40.285 | 1.00 | 0.00 | H |
| ATOM | 2049 | HG23 VAL | 133 | 40.813 | 58.675 | 39.882 | 1.00 | 0.00 | H |
| ATOM | 2050 | C VAL    | 133 | 41.261 | 57.475 | 43.916 | 1.00 | 0.00 | C |
| ATOM | 2051 | O VAL    | 133 | 42.100 | 57.857 | 44.723 | 1.00 | 0.00 | O |
| ATOM | 2052 | N ALA    | 134 | 40.261 | 56.654 | 44.271 | 1.00 | 0.00 | N |
| ATOM | 2053 | H ALA    | 134 | 39.593 | 56.363 | 43.567 | 1.00 | 0.00 | H |
| ATOM | 2054 | CA ALA   | 134 | 40.044 | 56.217 | 45.661 | 1.00 | 0.00 | C |
| ATOM | 2055 | HA ALA   | 134 | 39.759 | 57.089 | 46.252 | 1.00 | 0.00 | H |
| ATOM | 2056 | CB ALA   | 134 | 38.892 | 55.200 | 45.706 | 1.00 | 0.00 | C |
| ATOM | 2057 | HB1 ALA  | 134 | 38.025 | 55.569 | 45.165 | 1.00 | 0.00 | H |
| ATOM | 2058 | HB2 ALA  | 134 | 38.612 | 55.019 | 46.745 | 1.00 | 0.00 | H |
| ATOM | 2059 | HB3 ALA  | 134 | 39.205 | 54.255 | 45.261 | 1.00 | 0.00 | H |
| ATOM | 2060 | C ALA    | 134 | 41.308 | 55.609 | 46.305 | 1.00 | 0.00 | C |
| ATOM | 2061 | O ALA    | 134 | 41.672 | 55.969 | 47.424 | 1.00 | 0.00 | O |
| ATOM | 2062 | N SER    | 135 | 42.009 | 54.730 | 45.579 | 1.00 | 0.00 | N |
| ATOM | 2063 | H SER    | 135 | 41.647 | 54.473 | 44.666 | 1.00 | 0.00 | H |
| ATOM | 2064 | CA SER   | 135 | 43.245 | 54.089 | 46.048 | 1.00 | 0.00 | C |
| ATOM | 2065 | HA SER   | 135 | 43.066 | 53.691 | 47.046 | 1.00 | 0.00 | H |
| ATOM | 2066 | CB SER   | 135 | 43.564 | 52.911 | 45.120 | 1.00 | 0.00 | C |
| ATOM | 2067 | HB2 SER  | 135 | 42.688 | 52.266 | 45.039 | 1.00 | 0.00 | H |
| ATOM | 2068 | HB3 SER  | 135 | 43.810 | 53.287 | 44.125 | 1.00 | 0.00 | H |
| ATOM | 2069 | OG SER   | 135 | 44.648 | 52.153 | 45.612 | 1.00 | 0.00 | O |
| ATOM | 2070 | HG SER   | 135 | 44.393 | 51.770 | 46.463 | 1.00 | 0.00 | H |
| ATOM | 2071 | C SER    | 135 | 44.425 | 55.070 | 46.162 | 1.00 | 0.00 | C |
| ATOM | 2072 | O SER    | 135 | 45.146 | 55.067 | 47.166 | 1.00 | 0.00 | O |
| ATOM | 2073 | N ARG    | 136 | 44.596 | 55.985 | 45.192 | 1.00 | 0.00 | N |
| ATOM | 2074 | H ARG    | 136 | 43.969 | 55.961 | 44.392 | 1.00 | 0.00 | H |
| ATOM | 2075 | CA ARG   | 136 | 45.623 | 57.048 | 45.271 | 1.00 | 0.00 | C |
| ATOM | 2076 | HA ARG   | 136 | 46.560 | 56.582 | 45.583 | 1.00 | 0.00 | H |
| ATOM | 2077 | CB ARG   | 136 | 45.867 | 57.691 | 43.882 | 1.00 | 0.00 | C |
| ATOM | 2078 | HB2 ARG  | 136 | 44.937 | 58.136 | 43.524 | 1.00 | 0.00 | H |

|      |      |          |     |        |        |        |      |      |   |
|------|------|----------|-----|--------|--------|--------|------|------|---|
| ATOM | 2079 | HB3 ARG  | 136 | 46.602 | 58.489 | 44.002 | 1.00 | 0.00 | H |
| ATOM | 2080 | CG ARG   | 136 | 46.399 | 56.700 | 42.815 | 1.00 | 0.00 | C |
| ATOM | 2081 | HG2 ARG  | 136 | 47.246 | 56.148 | 43.223 | 1.00 | 0.00 | H |
| ATOM | 2082 | HG3 ARG  | 136 | 45.615 | 55.981 | 42.587 | 1.00 | 0.00 | H |
| ATOM | 2083 | CD ARG   | 136 | 46.851 | 57.385 | 41.504 | 1.00 | 0.00 | C |
| ATOM | 2084 | HD2 ARG  | 136 | 46.201 | 58.241 | 41.317 | 1.00 | 0.00 | H |
| ATOM | 2085 | HD3 ARG  | 136 | 47.872 | 57.752 | 41.629 | 1.00 | 0.00 | H |
| ATOM | 2086 | NE ARG   | 136 | 46.754 | 56.480 | 40.334 | 1.00 | 0.00 | N |
| ATOM | 2087 | HE ARG   | 136 | 45.872 | 55.984 | 40.229 | 1.00 | 0.00 | H |
| ATOM | 2088 | CZ ARG   | 136 | 47.598 | 56.279 | 39.329 | 1.00 | 0.00 | C |
| ATOM | 2089 | NH1 ARG  | 136 | 48.759 | 56.857 | 39.205 | 1.00 | 0.00 | N |
| ATOM | 2090 | HH11 ARG | 136 | 49.108 | 57.517 | 39.893 | 1.00 | 0.00 | H |
| ATOM | 2091 | HH12 ARG | 136 | 49.314 | 56.597 | 38.406 | 1.00 | 0.00 | H |
| ATOM | 2092 | NH2 ARG  | 136 | 47.273 | 55.470 | 38.366 | 1.00 | 0.00 | N |
| ATOM | 2093 | HH21 ARG | 136 | 46.378 | 55.004 | 38.361 | 1.00 | 0.00 | H |
| ATOM | 2094 | HH22 ARG | 136 | 47.905 | 55.294 | 37.575 | 1.00 | 0.00 | H |
| ATOM | 2095 | C ARG    | 136 | 45.313 | 58.085 | 46.375 | 1.00 | 0.00 | C |
| ATOM | 2096 | O ARG    | 136 | 46.245 | 58.612 | 46.980 | 1.00 | 0.00 | O |
| ATOM | 2097 | N ILE    | 137 | 44.038 | 58.339 | 46.694 | 1.00 | 0.00 | N |
| ATOM | 2098 | H ILE    | 137 | 43.318 | 57.907 | 46.124 | 1.00 | 0.00 | H |
| ATOM | 2099 | CA ILE   | 137 | 43.606 | 59.190 | 47.820 | 1.00 | 0.00 | C |
| ATOM | 2100 | HA ILE   | 137 | 44.234 | 60.079 | 47.837 | 1.00 | 0.00 | H |
| ATOM | 2101 | CB ILE   | 137 | 42.131 | 59.638 | 47.646 | 1.00 | 0.00 | C |
| ATOM | 2102 | HB ILE   | 137 | 41.529 | 58.759 | 47.409 | 1.00 | 0.00 | H |
| ATOM | 2103 | CG2 ILE  | 137 | 41.544 | 60.237 | 48.939 | 1.00 | 0.00 | C |
| ATOM | 2104 | HG21 ILE | 137 | 41.428 | 59.463 | 49.698 | 1.00 | 0.00 | H |
| ATOM | 2105 | HG22 ILE | 137 | 40.554 | 60.654 | 48.747 | 1.00 | 0.00 | H |
| ATOM | 2106 | HG23 ILE | 137 | 42.203 | 61.011 | 49.330 | 1.00 | 0.00 | H |
| ATOM | 2107 | CG1 ILE  | 137 | 41.954 | 60.648 | 46.487 | 1.00 | 0.00 | C |
| ATOM | 2108 | HG12 ILE | 137 | 42.098 | 60.135 | 45.544 | 1.00 | 0.00 | H |
| ATOM | 2109 | HG13 ILE | 137 | 40.930 | 61.021 | 46.496 | 1.00 | 0.00 | H |
| ATOM | 2110 | CD1 ILE  | 137 | 42.910 | 61.843 | 46.485 | 1.00 | 0.00 | C |
| ATOM | 2111 | HD11 ILE | 137 | 42.993 | 62.270 | 47.483 | 1.00 | 0.00 | H |
| ATOM | 2112 | HD12 ILE | 137 | 42.542 | 62.601 | 45.793 | 1.00 | 0.00 | H |
| ATOM | 2113 | HD13 ILE | 137 | 43.895 | 61.518 | 46.151 | 1.00 | 0.00 | H |
| ATOM | 2114 | C ILE    | 137 | 43.837 | 58.518 | 49.176 | 1.00 | 0.00 | C |
| ATOM | 2115 | O ILE    | 137 | 44.375 | 59.162 | 50.077 | 1.00 | 0.00 | O |
| ATOM | 2116 | N GLU    | 138 | 43.498 | 57.234 | 49.329 | 1.00 | 0.00 | N |
| ATOM | 2117 | H GLU    | 138 | 43.014 | 56.752 | 48.576 | 1.00 | 0.00 | H |
| ATOM | 2118 | CA GLU   | 138 | 43.836 | 56.480 | 50.544 | 1.00 | 0.00 | C |
| ATOM | 2119 | HA GLU   | 138 | 43.372 | 56.972 | 51.400 | 1.00 | 0.00 | H |
| ATOM | 2120 | CB GLU   | 138 | 43.273 | 55.051 | 50.460 | 1.00 | 0.00 | C |
| ATOM | 2121 | HB2 GLU  | 138 | 42.197 | 55.126 | 50.309 | 1.00 | 0.00 | H |
| ATOM | 2122 | HB3 GLU  | 138 | 43.691 | 54.539 | 49.593 | 1.00 | 0.00 | H |
| ATOM | 2123 | CG GLU   | 138 | 43.510 | 54.218 | 51.734 | 1.00 | 0.00 | C |
| ATOM | 2124 | HG2 GLU  | 138 | 43.192 | 54.803 | 52.600 | 1.00 | 0.00 | H |
| ATOM | 2125 | HG3 GLU  | 138 | 42.878 | 53.333 | 51.686 | 1.00 | 0.00 | H |
| ATOM | 2126 | CD GLU   | 138 | 44.959 | 53.751 | 51.912 | 1.00 | 0.00 | C |
| ATOM | 2127 | OE1 GLU  | 138 | 45.510 | 53.927 | 53.021 | 1.00 | 0.00 | O |
| ATOM | 2128 | OE2 GLU  | 138 | 45.568 | 53.279 | 50.934 | 1.00 | 0.00 | O |
| ATOM | 2129 | C GLU    | 138 | 45.352 | 56.504 | 50.774 | 1.00 | 0.00 | C |
| ATOM | 2130 | O GLU    | 138 | 45.796 | 56.859 | 51.866 | 1.00 | 0.00 | O |

|      |      |      |     |     |        |        |        |      |      |   |
|------|------|------|-----|-----|--------|--------|--------|------|------|---|
| ATOM | 2131 | N    | THR | 139 | 46.149 | 56.267 | 49.725 | 1.00 | 0.00 | N |
| ATOM | 2132 | H    | THR | 139 | 45.710 | 55.929 | 48.874 | 1.00 | 0.00 | H |
| ATOM | 2133 | CA   | THR | 139 | 47.618 | 56.341 | 49.784 | 1.00 | 0.00 | C |
| ATOM | 2134 | HA   | THR | 139 | 47.974 | 55.528 | 50.413 | 1.00 | 0.00 | H |
| ATOM | 2135 | CB   | THR | 139 | 48.235 | 56.134 | 48.390 | 1.00 | 0.00 | C |
| ATOM | 2136 | HB   | THR | 139 | 47.852 | 56.886 | 47.705 | 1.00 | 0.00 | H |
| ATOM | 2137 | CG2  | THR | 139 | 49.763 | 56.219 | 48.399 | 1.00 | 0.00 | C |
| ATOM | 2138 | HG21 | THR | 139 | 50.085 | 57.233 | 48.636 | 1.00 | 0.00 | H |
| ATOM | 2139 | HG22 | THR | 139 | 50.144 | 55.956 | 47.412 | 1.00 | 0.00 | H |
| ATOM | 2140 | HG23 | THR | 139 | 50.165 | 55.525 | 49.137 | 1.00 | 0.00 | H |
| ATOM | 2141 | OG1  | THR | 139 | 47.926 | 54.859 | 47.881 | 1.00 | 0.00 | O |
| ATOM | 2142 | HG1  | THR | 139 | 46.962 | 54.765 | 47.818 | 1.00 | 0.00 | H |
| ATOM | 2143 | C    | THR | 139 | 48.091 | 57.673 | 50.391 | 1.00 | 0.00 | C |
| ATOM | 2144 | O    | THR | 139 | 48.907 | 57.683 | 51.319 | 1.00 | 0.00 | O |
| ATOM | 2145 | N    | ALA | 140 | 47.526 | 58.799 | 49.936 | 1.00 | 0.00 | N |
| ATOM | 2146 | H    | ALA | 140 | 46.815 | 58.712 | 49.218 | 1.00 | 0.00 | H |
| ATOM | 2147 | CA   | ALA | 140 | 47.899 | 60.157 | 50.347 | 1.00 | 0.00 | C |
| ATOM | 2148 | HA   | ALA | 140 | 48.968 | 60.276 | 50.166 | 1.00 | 0.00 | H |
| ATOM | 2149 | CB   | ALA | 140 | 47.158 | 61.147 | 49.436 | 1.00 | 0.00 | C |
| ATOM | 2150 | HB1  | ALA | 140 | 47.345 | 60.905 | 48.389 | 1.00 | 0.00 | H |
| ATOM | 2151 | HB2  | ALA | 140 | 47.512 | 62.160 | 49.628 | 1.00 | 0.00 | H |
| ATOM | 2152 | HB3  | ALA | 140 | 46.085 | 61.106 | 49.626 | 1.00 | 0.00 | H |
| ATOM | 2153 | C    | ALA | 140 | 47.662 | 60.481 | 51.840 | 1.00 | 0.00 | C |
| ATOM | 2154 | O    | ALA | 140 | 48.293 | 61.402 | 52.366 | 1.00 | 0.00 | O |
| ATOM | 2155 | N    | THR | 141 | 46.836 | 59.712 | 52.561 | 1.00 | 0.00 | N |
| ATOM | 2156 | H    | THR | 141 | 46.343 | 58.965 | 52.080 | 1.00 | 0.00 | H |
| ATOM | 2157 | CA   | THR | 141 | 46.618 | 59.867 | 54.020 | 1.00 | 0.00 | C |
| ATOM | 2158 | HA   | THR | 141 | 46.147 | 60.828 | 54.217 | 1.00 | 0.00 | H |
| ATOM | 2159 | CB   | THR | 141 | 45.697 | 58.767 | 54.556 | 1.00 | 0.00 | C |
| ATOM | 2160 | HB   | THR | 141 | 45.613 | 58.892 | 55.629 | 1.00 | 0.00 | H |
| ATOM | 2161 | CG2  | THR | 141 | 44.281 | 58.771 | 53.985 | 1.00 | 0.00 | C |
| ATOM | 2162 | HG21 | THR | 141 | 44.295 | 58.781 | 52.896 | 1.00 | 0.00 | H |
| ATOM | 2163 | HG22 | THR | 141 | 43.751 | 59.653 | 54.341 | 1.00 | 0.00 | H |
| ATOM | 2164 | HG23 | THR | 141 | 43.747 | 57.885 | 54.328 | 1.00 | 0.00 | H |
| ATOM | 2165 | OG1  | THR | 141 | 46.290 | 57.512 | 54.347 | 1.00 | 0.00 | O |
| ATOM | 2166 | HG1  | THR | 141 | 46.031 | 57.203 | 53.453 | 1.00 | 0.00 | H |
| ATOM | 2167 | C    | THR | 141 | 47.915 | 59.826 | 54.842 | 1.00 | 0.00 | C |
| ATOM | 2168 | O    | THR | 141 | 48.014 | 60.483 | 55.877 | 1.00 | 0.00 | O |
| ATOM | 2169 | N    | ARG | 142 | 48.937 | 59.106 | 54.355 | 1.00 | 0.00 | N |
| ATOM | 2170 | H    | ARG | 142 | 48.753 | 58.591 | 53.502 | 1.00 | 0.00 | H |
| ATOM | 2171 | CA   | ARG | 142 | 50.286 | 59.013 | 54.946 | 1.00 | 0.00 | C |
| ATOM | 2172 | HA   | ARG | 142 | 50.207 | 58.725 | 55.995 | 1.00 | 0.00 | H |
| ATOM | 2173 | CB   | ARG | 142 | 51.081 | 57.931 | 54.178 | 1.00 | 0.00 | C |
| ATOM | 2174 | HB2  | ARG | 142 | 51.081 | 58.193 | 53.118 | 1.00 | 0.00 | H |
| ATOM | 2175 | HB3  | ARG | 142 | 52.118 | 57.929 | 54.523 | 1.00 | 0.00 | H |
| ATOM | 2176 | CG   | ARG | 142 | 50.506 | 56.508 | 54.356 | 1.00 | 0.00 | C |
| ATOM | 2177 | HG2  | ARG | 142 | 50.900 | 56.072 | 55.275 | 1.00 | 0.00 | H |
| ATOM | 2178 | HG3  | ARG | 142 | 49.427 | 56.573 | 54.470 | 1.00 | 0.00 | H |
| ATOM | 2179 | CD   | ARG | 142 | 50.834 | 55.578 | 53.166 | 1.00 | 0.00 | C |
| ATOM | 2180 | HD2  | ARG | 142 | 50.626 | 56.098 | 52.231 | 1.00 | 0.00 | H |
| ATOM | 2181 | HD3  | ARG | 142 | 51.900 | 55.345 | 53.186 | 1.00 | 0.00 | H |
| ATOM | 2182 | NE   | ARG | 142 | 50.067 | 54.312 | 53.180 | 1.00 | 0.00 | N |

|      |      |      |     |     |        |        |        |      |      |   |
|------|------|------|-----|-----|--------|--------|--------|------|------|---|
| ATOM | 2183 | HE   | ARG | 142 | 50.574 | 53.428 | 53.058 | 1.00 | 0.00 | H |
| ATOM | 2184 | CZ   | ARG | 142 | 48.753 | 54.173 | 53.116 | 1.00 | 0.00 | C |
| ATOM | 2185 | NH1  | ARG | 142 | 47.941 | 55.165 | 52.937 | 1.00 | 0.00 | N |
| ATOM | 2186 | HH11 | ARG | 142 | 48.274 | 56.077 | 52.695 | 1.00 | 0.00 | H |
| ATOM | 2187 | HH12 | ARG | 142 | 46.947 | 54.927 | 52.892 | 1.00 | 0.00 | H |
| ATOM | 2188 | NH2  | ARG | 142 | 48.181 | 53.025 | 53.240 | 1.00 | 0.00 | N |
| ATOM | 2189 | HH21 | ARG | 142 | 48.745 | 52.199 | 53.448 | 1.00 | 0.00 | H |
| ATOM | 2190 | HH22 | ARG | 142 | 47.169 | 52.983 | 53.130 | 1.00 | 0.00 | H |
| ATOM | 2191 | C    | ARG | 142 | 51.025 | 60.362 | 54.925 | 1.00 | 0.00 | C |
| ATOM | 2192 | O    | ARG | 142 | 51.756 | 60.674 | 55.861 | 1.00 | 0.00 | O |
| ATOM | 2193 | N    | ILE | 143 | 50.815 | 61.165 | 53.878 | 1.00 | 0.00 | N |
| ATOM | 2194 | H    | ILE | 143 | 50.132 | 60.864 | 53.196 | 1.00 | 0.00 | H |
| ATOM | 2195 | CA   | ILE | 143 | 51.453 | 62.478 | 53.672 | 1.00 | 0.00 | C |
| ATOM | 2196 | HA   | ILE | 143 | 52.462 | 62.456 | 54.087 | 1.00 | 0.00 | H |
| ATOM | 2197 | CB   | ILE | 143 | 51.561 | 62.787 | 52.154 | 1.00 | 0.00 | C |
| ATOM | 2198 | HB   | ILE | 143 | 50.562 | 62.721 | 51.721 | 1.00 | 0.00 | H |
| ATOM | 2199 | CG2  | ILE | 143 | 52.086 | 64.214 | 51.899 | 1.00 | 0.00 | C |
| ATOM | 2200 | HG21 | ILE | 143 | 51.404 | 64.957 | 52.316 | 1.00 | 0.00 | H |
| ATOM | 2201 | HG22 | ILE | 143 | 52.153 | 64.416 | 50.832 | 1.00 | 0.00 | H |
| ATOM | 2202 | HG23 | ILE | 143 | 53.071 | 64.340 | 52.351 | 1.00 | 0.00 | H |
| ATOM | 2203 | CG1  | ILE | 143 | 52.464 | 61.746 | 51.446 | 1.00 | 0.00 | C |
| ATOM | 2204 | HG12 | ILE | 143 | 53.496 | 61.874 | 51.777 | 1.00 | 0.00 | H |
| ATOM | 2205 | HG13 | ILE | 143 | 52.149 | 60.741 | 51.724 | 1.00 | 0.00 | H |
| ATOM | 2206 | CD1  | ILE | 143 | 52.417 | 61.813 | 49.913 | 1.00 | 0.00 | C |
| ATOM | 2207 | HD11 | ILE | 143 | 51.384 | 61.758 | 49.568 | 1.00 | 0.00 | H |
| ATOM | 2208 | HD12 | ILE | 143 | 52.973 | 60.971 | 49.500 | 1.00 | 0.00 | H |
| ATOM | 2209 | HD13 | ILE | 143 | 52.876 | 62.734 | 49.553 | 1.00 | 0.00 | H |
| ATOM | 2210 | C    | ILE | 143 | 50.688 | 63.583 | 54.412 | 1.00 | 0.00 | C |
| ATOM | 2211 | O    | ILE | 143 | 51.287 | 64.413 | 55.089 | 1.00 | 0.00 | O |
| ATOM | 2212 | N    | PHE | 144 | 49.356 | 63.591 | 54.301 | 1.00 | 0.00 | N |
| ATOM | 2213 | H    | PHE | 144 | 48.926 | 62.889 | 53.711 | 1.00 | 0.00 | H |
| ATOM | 2214 | CA   | PHE | 144 | 48.500 | 64.653 | 54.852 | 1.00 | 0.00 | C |
| ATOM | 2215 | HA   | PHE | 144 | 49.111 | 65.552 | 54.952 | 1.00 | 0.00 | H |
| ATOM | 2216 | CB   | PHE | 144 | 47.404 | 64.989 | 53.832 | 1.00 | 0.00 | C |
| ATOM | 2217 | HB2  | PHE | 144 | 46.820 | 64.094 | 53.625 | 1.00 | 0.00 | H |
| ATOM | 2218 | HB3  | PHE | 144 | 46.733 | 65.739 | 54.248 | 1.00 | 0.00 | H |
| ATOM | 2219 | CG   | PHE | 144 | 47.980 | 65.533 | 52.536 | 1.00 | 0.00 | C |
| ATOM | 2220 | CD1  | PHE | 144 | 48.429 | 66.866 | 52.474 | 1.00 | 0.00 | C |
| ATOM | 2221 | HD1  | PHE | 144 | 48.311 | 67.521 | 53.326 | 1.00 | 0.00 | H |
| ATOM | 2222 | CE1  | PHE | 144 | 49.051 | 67.349 | 51.309 | 1.00 | 0.00 | C |
| ATOM | 2223 | HE1  | PHE | 144 | 49.396 | 68.373 | 51.264 | 1.00 | 0.00 | H |
| ATOM | 2224 | CZ   | PHE | 144 | 49.232 | 66.499 | 50.205 | 1.00 | 0.00 | C |
| ATOM | 2225 | HZ   | PHE | 144 | 49.717 | 66.873 | 49.313 | 1.00 | 0.00 | H |
| ATOM | 2226 | CE2  | PHE | 144 | 48.774 | 65.171 | 50.258 | 1.00 | 0.00 | C |
| ATOM | 2227 | HE2  | PHE | 144 | 48.908 | 64.519 | 49.407 | 1.00 | 0.00 | H |
| ATOM | 2228 | CD2  | PHE | 144 | 48.141 | 64.693 | 51.419 | 1.00 | 0.00 | C |
| ATOM | 2229 | HD2  | PHE | 144 | 47.792 | 63.674 | 51.457 | 1.00 | 0.00 | H |
| ATOM | 2230 | C    | PHE | 144 | 47.990 | 64.372 | 56.279 | 1.00 | 0.00 | C |
| ATOM | 2231 | O    | PHE | 144 | 47.099 | 65.065 | 56.765 | 1.00 | 0.00 | O |
| ATOM | 2232 | N    | ASN | 145 | 48.572 | 63.379 | 56.958 | 1.00 | 0.00 | N |
| ATOM | 2233 | H    | ASN | 145 | 49.282 | 62.865 | 56.455 | 1.00 | 0.00 | H |
| ATOM | 2234 | CA   | ASN | 145 | 48.371 | 62.968 | 58.355 | 1.00 | 0.00 | C |

|      |      |      |     |     |        |        |        |      |      |   |
|------|------|------|-----|-----|--------|--------|--------|------|------|---|
| ATOM | 2235 | HA   | ASN | 145 | 48.979 | 62.071 | 58.485 | 1.00 | 0.00 | H |
| ATOM | 2236 | CB   | ASN | 145 | 48.962 | 64.026 | 59.307 | 1.00 | 0.00 | C |
| ATOM | 2237 | HB2  | ASN | 145 | 48.479 | 64.986 | 59.126 | 1.00 | 0.00 | H |
| ATOM | 2238 | HB3  | ASN | 145 | 48.751 | 63.740 | 60.337 | 1.00 | 0.00 | H |
| ATOM | 2239 | CG   | ASN | 145 | 50.472 | 64.183 | 59.192 | 1.00 | 0.00 | C |
| ATOM | 2240 | OD1  | ASN | 145 | 51.209 | 63.223 | 59.007 | 1.00 | 0.00 | O |
| ATOM | 2241 | ND2  | ASN | 145 | 50.965 | 65.390 | 59.333 | 1.00 | 0.00 | N |
| ATOM | 2242 | HD21 | ASN | 145 | 50.360 | 66.191 | 59.443 | 1.00 | 0.00 | H |
| ATOM | 2243 | HD22 | ASN | 145 | 51.975 | 65.507 | 59.374 | 1.00 | 0.00 | H |
| ATOM | 2244 | C    | ASN | 145 | 46.956 | 62.518 | 58.784 | 1.00 | 0.00 | C |
| ATOM | 2245 | O    | ASN | 145 | 46.870 | 61.682 | 59.686 | 1.00 | 0.00 | O |
| ATOM | 2246 | N    | SER | 146 | 45.863 | 62.973 | 58.158 | 1.00 | 0.00 | N |
| ATOM | 2247 | H    | SER | 146 | 45.990 | 63.694 | 57.459 | 1.00 | 0.00 | H |
| ATOM | 2248 | CA   | SER | 146 | 44.501 | 62.491 | 58.459 | 1.00 | 0.00 | C |
| ATOM | 2249 | HA   | SER | 146 | 44.313 | 62.657 | 59.521 | 1.00 | 0.00 | H |
| ATOM | 2250 | CB   | SER | 146 | 43.432 | 63.261 | 57.678 | 1.00 | 0.00 | C |
| ATOM | 2251 | HB2  | SER | 146 | 43.489 | 64.326 | 57.909 | 1.00 | 0.00 | H |
| ATOM | 2252 | HB3  | SER | 146 | 43.589 | 63.109 | 56.610 | 1.00 | 0.00 | H |
| ATOM | 2253 | OG   | SER | 146 | 42.163 | 62.754 | 58.050 | 1.00 | 0.00 | O |
| ATOM | 2254 | HG   | SER | 146 | 41.552 | 62.797 | 57.288 | 1.00 | 0.00 | H |
| ATOM | 2255 | C    | SER | 146 | 44.340 | 60.994 | 58.173 | 1.00 | 0.00 | C |
| ATOM | 2256 | O    | SER | 146 | 44.927 | 60.465 | 57.228 | 1.00 | 0.00 | O |
| ATOM | 2257 | N    | LYS | 147 | 43.529 | 60.295 | 58.976 | 1.00 | 0.00 | N |
| ATOM | 2258 | H    | LYS | 147 | 43.053 | 60.806 | 59.707 | 1.00 | 0.00 | H |
| ATOM | 2259 | CA   | LYS | 147 | 43.227 | 58.861 | 58.796 | 1.00 | 0.00 | C |
| ATOM | 2260 | HA   | LYS | 147 | 44.076 | 58.393 | 58.301 | 1.00 | 0.00 | H |
| ATOM | 2261 | CB   | LYS | 147 | 43.069 | 58.171 | 60.165 | 1.00 | 0.00 | C |
| ATOM | 2262 | HB2  | LYS | 147 | 42.264 | 58.636 | 60.736 | 1.00 | 0.00 | H |
| ATOM | 2263 | HB3  | LYS | 147 | 42.835 | 57.116 | 60.012 | 1.00 | 0.00 | H |
| ATOM | 2264 | CG   | LYS | 147 | 44.397 | 58.286 | 60.928 | 1.00 | 0.00 | C |
| ATOM | 2265 | HG2  | LYS | 147 | 45.191 | 57.937 | 60.270 | 1.00 | 0.00 | H |
| ATOM | 2266 | HG3  | LYS | 147 | 44.583 | 59.335 | 61.166 | 1.00 | 0.00 | H |
| ATOM | 2267 | CD   | LYS | 147 | 44.489 | 57.477 | 62.221 | 1.00 | 0.00 | C |
| ATOM | 2268 | HD2  | LYS | 147 | 43.708 | 57.777 | 62.922 | 1.00 | 0.00 | H |
| ATOM | 2269 | HD3  | LYS | 147 | 44.403 | 56.412 | 61.994 | 1.00 | 0.00 | H |
| ATOM | 2270 | CE   | LYS | 147 | 45.875 | 57.794 | 62.790 | 1.00 | 0.00 | C |
| ATOM | 2271 | HE2  | LYS | 147 | 46.607 | 57.685 | 61.986 | 1.00 | 0.00 | H |
| ATOM | 2272 | HE3  | LYS | 147 | 45.911 | 58.836 | 63.121 | 1.00 | 0.00 | H |
| ATOM | 2273 | NZ   | LYS | 147 | 46.280 | 56.898 | 63.888 | 1.00 | 0.00 | N |
| ATOM | 2274 | HZ1  | LYS | 147 | 46.227 | 55.920 | 63.587 | 1.00 | 0.00 | H |
| ATOM | 2275 | HZ2  | LYS | 147 | 45.726 | 57.009 | 64.719 | 1.00 | 0.00 | H |
| ATOM | 2276 | HZ3  | LYS | 147 | 47.268 | 57.052 | 64.086 | 1.00 | 0.00 | H |
| ATOM | 2277 | C    | LYS | 147 | 42.058 | 58.591 | 57.845 | 1.00 | 0.00 | C |
| ATOM | 2278 | O    | LYS | 147 | 41.933 | 57.469 | 57.364 | 1.00 | 0.00 | O |
| ATOM | 2279 | N    | VAL | 148 | 41.270 | 59.618 | 57.517 | 1.00 | 0.00 | N |
| ATOM | 2280 | H    | VAL | 148 | 41.475 | 60.516 | 57.932 | 1.00 | 0.00 | H |
| ATOM | 2281 | CA   | VAL | 148 | 40.226 | 59.590 | 56.479 | 1.00 | 0.00 | C |
| ATOM | 2282 | HA   | VAL | 148 | 40.360 | 58.700 | 55.867 | 1.00 | 0.00 | H |
| ATOM | 2283 | CB   | VAL | 148 | 38.803 | 59.536 | 57.080 | 1.00 | 0.00 | C |
| ATOM | 2284 | HB   | VAL | 148 | 38.603 | 60.479 | 57.592 | 1.00 | 0.00 | H |
| ATOM | 2285 | CG1  | VAL | 148 | 37.743 | 59.354 | 55.983 | 1.00 | 0.00 | C |
| ATOM | 2286 | HG11 | VAL | 148 | 37.928 | 58.433 | 55.429 | 1.00 | 0.00 | H |

|      |      |          |     |        |        |        |      |      |   |
|------|------|----------|-----|--------|--------|--------|------|------|---|
| ATOM | 2287 | HG12 VAL | 148 | 36.751 | 59.305 | 56.433 | 1.00 | 0.00 | H |
| ATOM | 2288 | HG13 VAL | 148 | 37.758 | 60.198 | 55.296 | 1.00 | 0.00 | H |
| ATOM | 2289 | CG2 VAL  | 148 | 38.625 | 58.405 | 58.104 | 1.00 | 0.00 | C |
| ATOM | 2290 | HG21 VAL | 148 | 38.871 | 57.444 | 57.657 | 1.00 | 0.00 | H |
| ATOM | 2291 | HG22 VAL | 148 | 37.592 | 58.380 | 58.454 | 1.00 | 0.00 | H |
| ATOM | 2292 | HG23 VAL | 148 | 39.268 | 58.573 | 58.967 | 1.00 | 0.00 | H |
| ATOM | 2293 | C VAL    | 148 | 40.388 | 60.820 | 55.584 | 1.00 | 0.00 | C |
| ATOM | 2294 | O VAL    | 148 | 40.493 | 61.937 | 56.096 | 1.00 | 0.00 | O |
| ATOM | 2295 | N LEU    | 149 | 40.407 | 60.634 | 54.262 | 1.00 | 0.00 | N |
| ATOM | 2296 | H LEU    | 149 | 40.383 | 59.684 | 53.904 | 1.00 | 0.00 | H |
| ATOM | 2297 | CA LEU   | 149 | 40.404 | 61.730 | 53.283 | 1.00 | 0.00 | C |
| ATOM | 2298 | HA LEU   | 149 | 40.096 | 62.647 | 53.785 | 1.00 | 0.00 | H |
| ATOM | 2299 | CB LEU   | 149 | 41.811 | 61.947 | 52.696 | 1.00 | 0.00 | C |
| ATOM | 2300 | HB2 LEU  | 149 | 42.180 | 60.987 | 52.330 | 1.00 | 0.00 | H |
| ATOM | 2301 | HB3 LEU  | 149 | 41.734 | 62.618 | 51.840 | 1.00 | 0.00 | H |
| ATOM | 2302 | CG LEU   | 149 | 42.833 | 62.541 | 53.685 | 1.00 | 0.00 | C |
| ATOM | 2303 | HG LEU   | 149 | 42.864 | 61.933 | 54.588 | 1.00 | 0.00 | H |
| ATOM | 2304 | CD1 LEU  | 149 | 44.230 | 62.530 | 53.068 | 1.00 | 0.00 | C |
| ATOM | 2305 | HD11 LEU | 149 | 44.456 | 61.537 | 52.678 | 1.00 | 0.00 | H |
| ATOM | 2306 | HD12 LEU | 149 | 44.958 | 62.787 | 53.835 | 1.00 | 0.00 | H |
| ATOM | 2307 | HD13 LEU | 149 | 44.293 | 63.252 | 52.256 | 1.00 | 0.00 | H |
| ATOM | 2308 | CD2 LEU  | 149 | 42.511 | 63.991 | 54.064 | 1.00 | 0.00 | C |
| ATOM | 2309 | HD21 LEU | 149 | 42.392 | 64.597 | 53.166 | 1.00 | 0.00 | H |
| ATOM | 2310 | HD22 LEU | 149 | 41.587 | 64.030 | 54.641 | 1.00 | 0.00 | H |
| ATOM | 2311 | HD23 LEU | 149 | 43.313 | 64.407 | 54.671 | 1.00 | 0.00 | H |
| ATOM | 2312 | C LEU    | 149 | 39.372 | 61.476 | 52.182 | 1.00 | 0.00 | C |
| ATOM | 2313 | O LEU    | 149 | 39.257 | 60.363 | 51.666 | 1.00 | 0.00 | O |
| ATOM | 2314 | N ILE    | 150 | 38.622 | 62.517 | 51.815 | 1.00 | 0.00 | N |
| ATOM | 2315 | H ILE    | 150 | 38.761 | 63.403 | 52.294 | 1.00 | 0.00 | H |
| ATOM | 2316 | CA ILE   | 150 | 37.519 | 62.417 | 50.850 | 1.00 | 0.00 | C |
| ATOM | 2317 | HA ILE   | 150 | 37.606 | 61.457 | 50.341 | 1.00 | 0.00 | H |
| ATOM | 2318 | CB ILE   | 150 | 36.138 | 62.400 | 51.554 | 1.00 | 0.00 | C |
| ATOM | 2319 | HB ILE   | 150 | 35.424 | 62.045 | 50.811 | 1.00 | 0.00 | H |
| ATOM | 2320 | CG2 ILE  | 150 | 36.122 | 61.388 | 52.717 | 1.00 | 0.00 | C |
| ATOM | 2321 | HG21 ILE | 150 | 36.618 | 60.465 | 52.422 | 1.00 | 0.00 | H |
| ATOM | 2322 | HG22 ILE | 150 | 35.097 | 61.150 | 52.998 | 1.00 | 0.00 | H |
| ATOM | 2323 | HG23 ILE | 150 | 36.639 | 61.801 | 53.585 | 1.00 | 0.00 | H |
| ATOM | 2324 | CG1 ILE  | 150 | 35.656 | 63.790 | 52.032 | 1.00 | 0.00 | C |
| ATOM | 2325 | HG12 ILE | 150 | 36.304 | 64.139 | 52.838 | 1.00 | 0.00 | H |
| ATOM | 2326 | HG13 ILE | 150 | 35.716 | 64.504 | 51.213 | 1.00 | 0.00 | H |
| ATOM | 2327 | CD1 ILE  | 150 | 34.202 | 63.802 | 52.519 | 1.00 | 0.00 | C |
| ATOM | 2328 | HD11 ILE | 150 | 33.530 | 63.563 | 51.695 | 1.00 | 0.00 | H |
| ATOM | 2329 | HD12 ILE | 150 | 33.957 | 64.792 | 52.902 | 1.00 | 0.00 | H |
| ATOM | 2330 | HD13 ILE | 150 | 34.058 | 63.082 | 53.319 | 1.00 | 0.00 | H |
| ATOM | 2331 | C ILE    | 150 | 37.638 | 63.483 | 49.758 | 1.00 | 0.00 | C |
| ATOM | 2332 | O ILE    | 150 | 38.004 | 64.632 | 50.020 | 1.00 | 0.00 | O |
| ATOM | 2333 | N HIE    | 151 | 37.343 | 63.096 | 48.516 | 1.00 | 0.00 | N |
| ATOM | 2334 | H HIE    | 151 | 37.086 | 62.126 | 48.368 | 1.00 | 0.00 | H |
| ATOM | 2335 | CA HIE   | 151 | 37.336 | 64.004 | 47.363 | 1.00 | 0.00 | C |
| ATOM | 2336 | HA HIE   | 151 | 38.239 | 64.616 | 47.393 | 1.00 | 0.00 | H |
| ATOM | 2337 | CB HIE   | 151 | 37.377 | 63.157 | 46.084 | 1.00 | 0.00 | C |
| ATOM | 2338 | HB2 HIE  | 151 | 38.309 | 62.589 | 46.068 | 1.00 | 0.00 | H |



|      |      |         |     |        |        |        |      |      |   |
|------|------|---------|-----|--------|--------|--------|------|------|---|
| ATOM | 2339 | HB3 HIE | 151 | 36.549 | 62.447 | 46.105 | 1.00 | 0.00 | H |
| ATOM | 2340 | CG HIE  | 151 | 37.276 | 63.959 | 44.813 | 1.00 | 0.00 | C |
| ATOM | 2341 | ND1 HIE | 151 | 36.122 | 64.095 | 44.043 | 1.00 | 0.00 | N |
| ATOM | 2342 | CE1 HIE | 151 | 36.429 | 64.949 | 43.054 | 1.00 | 0.00 | C |
| ATOM | 2343 | HE1 HIE | 151 | 35.748 | 65.253 | 42.266 | 1.00 | 0.00 | H |
| ATOM | 2344 | NE2 HIE | 151 | 37.695 | 65.379 | 43.191 | 1.00 | 0.00 | N |
| ATOM | 2345 | HE2 HIE | 151 | 38.153 | 66.037 | 42.573 | 1.00 | 0.00 | H |
| ATOM | 2346 | CD2 HIE | 151 | 38.244 | 64.771 | 44.301 | 1.00 | 0.00 | C |
| ATOM | 2347 | HD2 HIE | 151 | 39.231 | 64.926 | 44.719 | 1.00 | 0.00 | H |
| ATOM | 2348 | C HIE   | 151 | 36.143 | 64.976 | 47.383 | 1.00 | 0.00 | C |
| ATOM | 2349 | O HIE   | 151 | 35.111 | 64.698 | 47.991 | 1.00 | 0.00 | O |
| ATOM | 2350 | N SER   | 152 | 36.261 | 66.102 | 46.670 | 1.00 | 0.00 | N |
| ATOM | 2351 | H SER   | 152 | 37.155 | 66.282 | 46.231 | 1.00 | 0.00 | H |
| ATOM | 2352 | CA SER  | 152 | 35.228 | 67.150 | 46.578 | 1.00 | 0.00 | C |
| ATOM | 2353 | HA SER  | 152 | 35.128 | 67.603 | 47.564 | 1.00 | 0.00 | H |
| ATOM | 2354 | CB SER  | 152 | 35.694 | 68.227 | 45.588 | 1.00 | 0.00 | C |
| ATOM | 2355 | HB2 SER | 152 | 36.781 | 68.208 | 45.536 | 1.00 | 0.00 | H |
| ATOM | 2356 | HB3 SER | 152 | 35.306 | 68.016 | 44.590 | 1.00 | 0.00 | H |
| ATOM | 2357 | OG SER  | 152 | 35.292 | 69.522 | 46.001 | 1.00 | 0.00 | O |
| ATOM | 2358 | HG SER  | 152 | 34.391 | 69.683 | 45.629 | 1.00 | 0.00 | H |
| ATOM | 2359 | C SER   | 152 | 33.832 | 66.640 | 46.192 | 1.00 | 0.00 | C |
| ATOM | 2360 | O SER   | 152 | 32.844 | 67.129 | 46.734 | 1.00 | 0.00 | O |
| ATOM | 2361 | N HID   | 153 | 33.723 | 65.604 | 45.349 | 1.00 | 0.00 | N |
| ATOM | 2362 | H HID   | 153 | 34.567 | 65.203 | 44.955 | 1.00 | 0.00 | H |
| ATOM | 2363 | CA HID  | 153 | 32.444 | 64.939 | 45.055 | 1.00 | 0.00 | C |
| ATOM | 2364 | HA HID  | 153 | 31.754 | 65.651 | 44.600 | 1.00 | 0.00 | H |
| ATOM | 2365 | CB HID  | 153 | 32.690 | 63.777 | 44.080 | 1.00 | 0.00 | C |
| ATOM | 2366 | HB2 HID | 153 | 33.496 | 63.148 | 44.462 | 1.00 | 0.00 | H |
| ATOM | 2367 | HB3 HID | 153 | 31.793 | 63.161 | 44.048 | 1.00 | 0.00 | H |
| ATOM | 2368 | CG HID  | 153 | 33.011 | 64.171 | 42.660 | 1.00 | 0.00 | C |
| ATOM | 2369 | ND1 HID | 153 | 33.359 | 63.296 | 41.656 | 1.00 | 0.00 | N |
| ATOM | 2370 | HD1 HID | 153 | 33.525 | 62.296 | 41.761 | 1.00 | 0.00 | H |
| ATOM | 2371 | CE1 HID | 153 | 33.416 | 63.977 | 40.502 | 1.00 | 0.00 | C |
| ATOM | 2372 | HE1 HID | 153 | 33.655 | 63.549 | 39.536 | 1.00 | 0.00 | H |
| ATOM | 2373 | NE2 HID | 153 | 33.109 | 65.266 | 40.712 | 1.00 | 0.00 | N |
| ATOM | 2374 | CD2 HID | 153 | 32.860 | 65.404 | 42.080 | 1.00 | 0.00 | C |
| ATOM | 2375 | HD2 HID | 153 | 32.538 | 66.312 | 42.572 | 1.00 | 0.00 | H |
| ATOM | 2376 | C HID   | 153 | 31.754 | 64.396 | 46.315 | 1.00 | 0.00 | C |
| ATOM | 2377 | O HID   | 153 | 30.554 | 64.587 | 46.502 | 1.00 | 0.00 | O |
| ATOM | 2378 | N CYS   | 154 | 32.514 | 63.762 | 47.208 | 1.00 | 0.00 | N |
| ATOM | 2379 | H CYS   | 154 | 33.511 | 63.711 | 47.050 | 1.00 | 0.00 | H |
| ATOM | 2380 | CA CYS  | 154 | 32.009 | 63.179 | 48.451 | 1.00 | 0.00 | C |
| ATOM | 2381 | HA CYS  | 154 | 31.146 | 62.557 | 48.217 | 1.00 | 0.00 | H |
| ATOM | 2382 | CB CYS  | 154 | 33.106 | 62.289 | 49.047 | 1.00 | 0.00 | C |
| ATOM | 2383 | HB2 CYS | 154 | 33.945 | 62.918 | 49.347 | 1.00 | 0.00 | H |
| ATOM | 2384 | HB3 CYS | 154 | 32.719 | 61.771 | 49.928 | 1.00 | 0.00 | H |
| ATOM | 2385 | SG CYS  | 154 | 33.668 | 61.079 | 47.814 | 1.00 | 0.00 | S |
| ATOM | 2386 | HG CYS  | 154 | 34.795 | 60.701 | 48.440 | 1.00 | 0.00 | H |
| ATOM | 2387 | C CYS   | 154 | 31.550 | 64.241 | 49.467 | 1.00 | 0.00 | C |
| ATOM | 2388 | O CYS   | 154 | 30.771 | 63.929 | 50.363 | 1.00 | 0.00 | O |
| ATOM | 2389 | N VAL   | 155 | 32.004 | 65.491 | 49.328 | 1.00 | 0.00 | N |
| ATOM | 2390 | H VAL   | 155 | 32.679 | 65.668 | 48.595 | 1.00 | 0.00 | H |

|      |      |      |     |     |        |        |        |      |      |   |
|------|------|------|-----|-----|--------|--------|--------|------|------|---|
| ATOM | 2391 | CA   | VAL | 155 | 31.462 | 66.642 | 50.070 | 1.00 | 0.00 | C |
| ATOM | 2392 | HA   | VAL | 155 | 31.132 | 66.311 | 51.056 | 1.00 | 0.00 | H |
| ATOM | 2393 | CB   | VAL | 155 | 32.540 | 67.729 | 50.274 | 1.00 | 0.00 | C |
| ATOM | 2394 | HB   | VAL | 155 | 32.943 | 68.023 | 49.304 | 1.00 | 0.00 | H |
| ATOM | 2395 | CG1  | VAL | 155 | 31.992 | 68.987 | 50.962 | 1.00 | 0.00 | C |
| ATOM | 2396 | HG11 | VAL | 155 | 31.249 | 69.474 | 50.333 | 1.00 | 0.00 | H |
| ATOM | 2397 | HG12 | VAL | 155 | 31.538 | 68.722 | 51.918 | 1.00 | 0.00 | H |
| ATOM | 2398 | HG13 | VAL | 155 | 32.803 | 69.696 | 51.137 | 1.00 | 0.00 | H |
| ATOM | 2399 | CG2  | VAL | 155 | 33.691 | 67.199 | 51.132 | 1.00 | 0.00 | C |
| ATOM | 2400 | HG21 | VAL | 155 | 34.181 | 66.363 | 50.634 | 1.00 | 0.00 | H |
| ATOM | 2401 | HG22 | VAL | 155 | 33.314 | 66.879 | 52.104 | 1.00 | 0.00 | H |
| ATOM | 2402 | HG23 | VAL | 155 | 34.425 | 67.987 | 51.282 | 1.00 | 0.00 | H |
| ATOM | 2403 | C    | VAL | 155 | 30.236 | 67.224 | 49.363 | 1.00 | 0.00 | C |
| ATOM | 2404 | O    | VAL | 155 | 29.194 | 67.422 | 49.977 | 1.00 | 0.00 | O |
| ATOM | 2405 | N    | GLN | 156 | 30.341 | 67.525 | 48.068 | 1.00 | 0.00 | N |
| ATOM | 2406 | H    | GLN | 156 | 31.214 | 67.319 | 47.595 | 1.00 | 0.00 | H |
| ATOM | 2407 | CA   | GLN | 156 | 29.351 | 68.344 | 47.356 | 1.00 | 0.00 | C |
| ATOM | 2408 | HA   | GLN | 156 | 29.024 | 69.141 | 48.026 | 1.00 | 0.00 | H |
| ATOM | 2409 | CB   | GLN | 156 | 30.025 | 69.006 | 46.143 | 1.00 | 0.00 | C |
| ATOM | 2410 | HB2  | GLN | 156 | 30.497 | 68.238 | 45.527 | 1.00 | 0.00 | H |
| ATOM | 2411 | HB3  | GLN | 156 | 29.270 | 69.515 | 45.542 | 1.00 | 0.00 | H |
| ATOM | 2412 | CG   | GLN | 156 | 31.077 | 70.041 | 46.585 | 1.00 | 0.00 | C |
| ATOM | 2413 | HG2  | GLN | 156 | 30.576 | 70.874 | 47.079 | 1.00 | 0.00 | H |
| ATOM | 2414 | HG3  | GLN | 156 | 31.771 | 69.596 | 47.297 | 1.00 | 0.00 | H |
| ATOM | 2415 | CD   | GLN | 156 | 31.894 | 70.560 | 45.411 | 1.00 | 0.00 | C |
| ATOM | 2416 | OE1  | GLN | 156 | 32.901 | 69.983 | 45.025 | 1.00 | 0.00 | O |
| ATOM | 2417 | NE2  | GLN | 156 | 31.515 | 71.669 | 44.820 | 1.00 | 0.00 | N |
| ATOM | 2418 | HE21 | GLN | 156 | 32.054 | 71.987 | 44.036 | 1.00 | 0.00 | H |
| ATOM | 2419 | HE22 | GLN | 156 | 30.725 | 72.198 | 45.180 | 1.00 | 0.00 | H |
| ATOM | 2420 | C    | GLN | 156 | 28.076 | 67.583 | 46.957 | 1.00 | 0.00 | C |
| ATOM | 2421 | O    | GLN | 156 | 27.015 | 68.202 | 46.833 | 1.00 | 0.00 | O |
| ATOM | 2422 | N    | TYR | 157 | 28.142 | 66.259 | 46.784 | 1.00 | 0.00 | N |
| ATOM | 2423 | H    | TYR | 157 | 29.050 | 65.805 | 46.829 | 1.00 | 0.00 | H |
| ATOM | 2424 | CA   | TYR | 157 | 26.970 | 65.406 | 46.535 | 1.00 | 0.00 | C |
| ATOM | 2425 | HA   | TYR | 157 | 26.208 | 65.998 | 46.030 | 1.00 | 0.00 | H |
| ATOM | 2426 | CB   | TYR | 157 | 27.356 | 64.263 | 45.578 | 1.00 | 0.00 | C |
| ATOM | 2427 | HB2  | TYR | 157 | 28.018 | 63.582 | 46.115 | 1.00 | 0.00 | H |
| ATOM | 2428 | HB3  | TYR | 157 | 26.454 | 63.705 | 45.324 | 1.00 | 0.00 | H |
| ATOM | 2429 | CG   | TYR | 157 | 28.034 | 64.673 | 44.270 | 1.00 | 0.00 | C |
| ATOM | 2430 | CD1  | TYR | 157 | 27.718 | 65.890 | 43.625 | 1.00 | 0.00 | C |
| ATOM | 2431 | HD1  | TYR | 157 | 26.973 | 66.555 | 44.035 | 1.00 | 0.00 | H |
| ATOM | 2432 | CE1  | TYR | 157 | 28.380 | 66.258 | 42.437 | 1.00 | 0.00 | C |
| ATOM | 2433 | HE1  | TYR | 157 | 28.152 | 67.191 | 41.945 | 1.00 | 0.00 | H |
| ATOM | 2434 | CZ   | TYR | 157 | 29.350 | 65.407 | 41.870 | 1.00 | 0.00 | C |
| ATOM | 2435 | OH   | TYR | 157 | 30.003 | 65.792 | 40.742 | 1.00 | 0.00 | O |
| ATOM | 2436 | HH   | TYR | 157 | 30.892 | 65.425 | 40.661 | 1.00 | 0.00 | H |
| ATOM | 2437 | CE2  | TYR | 157 | 29.636 | 64.171 | 42.487 | 1.00 | 0.00 | C |
| ATOM | 2438 | HE2  | TYR | 157 | 30.352 | 63.504 | 42.033 | 1.00 | 0.00 | H |
| ATOM | 2439 | CD2  | TYR | 157 | 28.983 | 63.811 | 43.684 | 1.00 | 0.00 | C |
| ATOM | 2440 | HD2  | TYR | 157 | 29.211 | 62.867 | 44.160 | 1.00 | 0.00 | H |
| ATOM | 2441 | C    | TYR | 157 | 26.295 | 64.905 | 47.830 | 1.00 | 0.00 | C |
| ATOM | 2442 | O    | TYR | 157 | 25.299 | 64.187 | 47.772 | 1.00 | 0.00 | O |

|      |      |      |     |     |        |        |        |      |      |   |
|------|------|------|-----|-----|--------|--------|--------|------|------|---|
| ATOM | 2443 | N    | LEU | 158 | 26.807 | 65.293 | 49.004 | 1.00 | 0.00 | N |
| ATOM | 2444 | H    | LEU | 158 | 27.598 | 65.922 | 48.998 | 1.00 | 0.00 | H |
| ATOM | 2445 | CA   | LEU | 158 | 26.242 | 64.954 | 50.309 | 1.00 | 0.00 | C |
| ATOM | 2446 | HA   | LEU | 158 | 25.896 | 63.922 | 50.255 | 1.00 | 0.00 | H |
| ATOM | 2447 | CB   | LEU | 158 | 27.381 | 65.045 | 51.335 | 1.00 | 0.00 | C |
| ATOM | 2448 | HB2  | LEU | 158 | 28.251 | 64.514 | 50.947 | 1.00 | 0.00 | H |
| ATOM | 2449 | HB3  | LEU | 158 | 27.649 | 66.096 | 51.443 | 1.00 | 0.00 | H |
| ATOM | 2450 | CG   | LEU | 158 | 27.064 | 64.498 | 52.732 | 1.00 | 0.00 | C |
| ATOM | 2451 | HG   | LEU | 158 | 26.195 | 65.007 | 53.141 | 1.00 | 0.00 | H |
| ATOM | 2452 | CD1  | LEU | 158 | 26.815 | 62.989 | 52.724 | 1.00 | 0.00 | C |
| ATOM | 2453 | HD11 | LEU | 158 | 25.931 | 62.750 | 52.140 | 1.00 | 0.00 | H |
| ATOM | 2454 | HD12 | LEU | 158 | 26.672 | 62.648 | 53.748 | 1.00 | 0.00 | H |
| ATOM | 2455 | HD13 | LEU | 158 | 27.679 | 62.481 | 52.296 | 1.00 | 0.00 | H |
| ATOM | 2456 | CD2  | LEU | 158 | 28.244 | 64.780 | 53.644 | 1.00 | 0.00 | C |
| ATOM | 2457 | HD21 | LEU | 158 | 29.144 | 64.307 | 53.252 | 1.00 | 0.00 | H |
| ATOM | 2458 | HD22 | LEU | 158 | 28.404 | 65.857 | 53.685 | 1.00 | 0.00 | H |
| ATOM | 2459 | HD23 | LEU | 158 | 28.036 | 64.414 | 54.648 | 1.00 | 0.00 | H |
| ATOM | 2460 | C    | LEU | 158 | 25.040 | 65.846 | 50.692 | 1.00 | 0.00 | C |
| ATOM | 2461 | O    | LEU | 158 | 24.957 | 67.017 | 50.313 | 1.00 | 0.00 | O |
| ATOM | 2462 | N    | GLY | 159 | 24.117 | 65.288 | 51.484 | 1.00 | 0.00 | N |
| ATOM | 2463 | H    | GLY | 159 | 24.239 | 64.319 | 51.722 | 1.00 | 0.00 | H |
| ATOM | 2464 | CA   | GLY | 159 | 22.992 | 66.011 | 52.099 | 1.00 | 0.00 | C |
| ATOM | 2465 | HA2  | GLY | 159 | 22.772 | 66.911 | 51.521 | 1.00 | 0.00 | H |
| ATOM | 2466 | HA3  | GLY | 159 | 22.105 | 65.379 | 52.062 | 1.00 | 0.00 | H |
| ATOM | 2467 | C    | GLY | 159 | 23.222 | 66.430 | 53.566 | 1.00 | 0.00 | C |
| ATOM | 2468 | O    | GLY | 159 | 23.011 | 67.604 | 53.878 | 1.00 | 0.00 | O |
| ATOM | 2469 | N    | PRO | 160 | 23.625 | 65.506 | 54.471 | 1.00 | 0.00 | N |
| ATOM | 2470 | CD   | PRO | 160 | 23.541 | 64.061 | 54.289 | 1.00 | 0.00 | C |
| ATOM | 2471 | HD2  | PRO | 160 | 24.482 | 63.686 | 53.895 | 1.00 | 0.00 | H |
| ATOM | 2472 | HD3  | PRO | 160 | 22.718 | 63.781 | 53.631 | 1.00 | 0.00 | H |
| ATOM | 2473 | CG   | PRO | 160 | 23.306 | 63.477 | 55.681 | 1.00 | 0.00 | C |
| ATOM | 2474 | HG2  | PRO | 160 | 23.676 | 62.457 | 55.765 | 1.00 | 0.00 | H |
| ATOM | 2475 | HG3  | PRO | 160 | 22.245 | 63.527 | 55.931 | 1.00 | 0.00 | H |
| ATOM | 2476 | CB   | PRO | 160 | 24.094 | 64.438 | 56.564 | 1.00 | 0.00 | C |
| ATOM | 2477 | HB2  | PRO | 160 | 25.159 | 64.205 | 56.503 | 1.00 | 0.00 | H |
| ATOM | 2478 | HB3  | PRO | 160 | 23.751 | 64.411 | 57.599 | 1.00 | 0.00 | H |
| ATOM | 2479 | CA   | PRO | 160 | 23.808 | 65.788 | 55.901 | 1.00 | 0.00 | C |
| ATOM | 2480 | HA   | PRO | 160 | 22.848 | 66.146 | 56.275 | 1.00 | 0.00 | H |
| ATOM | 2481 | C    | PRO | 160 | 24.874 | 66.831 | 56.279 | 1.00 | 0.00 | C |
| ATOM | 2482 | O    | PRO | 160 | 25.875 | 67.034 | 55.593 | 1.00 | 0.00 | O |
| ATOM | 2483 | N    | LYS | 161 | 24.641 | 67.462 | 57.435 | 1.00 | 0.00 | N |
| ATOM | 2484 | H    | LYS | 161 | 23.850 | 67.131 | 57.965 | 1.00 | 0.00 | H |
| ATOM | 2485 | CA   | LYS | 161 | 25.322 | 68.649 | 57.982 | 1.00 | 0.00 | C |
| ATOM | 2486 | HA   | LYS | 161 | 25.545 | 69.337 | 57.164 | 1.00 | 0.00 | H |
| ATOM | 2487 | CB   | LYS | 161 | 24.342 | 69.347 | 58.961 | 1.00 | 0.00 | C |
| ATOM | 2488 | HB2  | LYS | 161 | 24.127 | 68.656 | 59.779 | 1.00 | 0.00 | H |
| ATOM | 2489 | HB3  | LYS | 161 | 24.830 | 70.226 | 59.388 | 1.00 | 0.00 | H |
| ATOM | 2490 | CG   | LYS | 161 | 23.008 | 69.799 | 58.327 | 1.00 | 0.00 | C |
| ATOM | 2491 | HG2  | LYS | 161 | 23.196 | 70.652 | 57.673 | 1.00 | 0.00 | H |
| ATOM | 2492 | HG3  | LYS | 161 | 22.587 | 68.992 | 57.726 | 1.00 | 0.00 | H |
| ATOM | 2493 | CD   | LYS | 161 | 21.963 | 70.183 | 59.391 | 1.00 | 0.00 | C |
| ATOM | 2494 | HD2  | LYS | 161 | 21.777 | 69.320 | 60.033 | 1.00 | 0.00 | H |

|      |      |          |     |        |        |        |      |      |   |
|------|------|----------|-----|--------|--------|--------|------|------|---|
| ATOM | 2495 | HD3 LYS  | 161 | 22.344 | 71.004 | 60.001 | 1.00 | 0.00 | H |
| ATOM | 2496 | CE LYS   | 161 | 20.649 | 70.607 | 58.717 | 1.00 | 0.00 | C |
| ATOM | 2497 | HE2 LYS  | 161 | 20.814 | 71.551 | 58.188 | 1.00 | 0.00 | H |
| ATOM | 2498 | HE3 LYS  | 161 | 20.375 | 69.861 | 57.965 | 1.00 | 0.00 | H |
| ATOM | 2499 | NZ LYS   | 161 | 19.532 | 70.762 | 59.682 | 1.00 | 0.00 | N |
| ATOM | 2500 | HZ1 LYS  | 161 | 19.736 | 71.395 | 60.448 | 1.00 | 0.00 | H |
| ATOM | 2501 | HZ2 LYS  | 161 | 19.226 | 69.887 | 60.106 | 1.00 | 0.00 | H |
| ATOM | 2502 | HZ3 LYS  | 161 | 18.704 | 71.150 | 59.238 | 1.00 | 0.00 | H |
| ATOM | 2503 | C LYS    | 161 | 26.675 | 68.318 | 58.650 | 1.00 | 0.00 | C |
| ATOM | 2504 | O LYS    | 161 | 26.861 | 68.588 | 59.836 | 1.00 | 0.00 | O |
| ATOM | 2505 | N ILE    | 162 | 27.591 | 67.655 | 57.940 | 1.00 | 0.00 | N |
| ATOM | 2506 | H ILE    | 162 | 27.367 | 67.427 | 56.980 | 1.00 | 0.00 | H |
| ATOM | 2507 | CA ILE   | 162 | 28.894 | 67.232 | 58.498 | 1.00 | 0.00 | C |
| ATOM | 2508 | HA ILE   | 162 | 28.701 | 66.819 | 59.489 | 1.00 | 0.00 | H |
| ATOM | 2509 | CB ILE   | 162 | 29.537 | 66.100 | 57.668 | 1.00 | 0.00 | C |
| ATOM | 2510 | HB ILE   | 162 | 30.452 | 65.807 | 58.186 | 1.00 | 0.00 | H |
| ATOM | 2511 | CG2 ILE  | 162 | 28.611 | 64.870 | 57.651 | 1.00 | 0.00 | C |
| ATOM | 2512 | HG21 ILE | 162 | 28.310 | 64.620 | 58.670 | 1.00 | 0.00 | H |
| ATOM | 2513 | HG22 ILE | 162 | 29.132 | 64.009 | 57.234 | 1.00 | 0.00 | H |
| ATOM | 2514 | HG23 ILE | 162 | 27.719 | 65.071 | 57.058 | 1.00 | 0.00 | H |
| ATOM | 2515 | CG1 ILE  | 162 | 29.930 | 66.559 | 56.247 | 1.00 | 0.00 | C |
| ATOM | 2516 | HG12 ILE | 162 | 29.028 | 66.716 | 55.657 | 1.00 | 0.00 | H |
| ATOM | 2517 | HG13 ILE | 162 | 30.460 | 67.508 | 56.294 | 1.00 | 0.00 | H |
| ATOM | 2518 | CD1 ILE  | 162 | 30.858 | 65.573 | 55.531 | 1.00 | 0.00 | C |
| ATOM | 2519 | HD11 ILE | 162 | 31.781 | 65.475 | 56.097 | 1.00 | 0.00 | H |
| ATOM | 2520 | HD12 ILE | 162 | 31.091 | 65.949 | 54.535 | 1.00 | 0.00 | H |
| ATOM | 2521 | HD13 ILE | 162 | 30.391 | 64.595 | 55.441 | 1.00 | 0.00 | H |
| ATOM | 2522 | C ILE    | 162 | 29.870 | 68.406 | 58.704 | 1.00 | 0.00 | C |
| ATOM | 2523 | O ILE    | 162 | 29.867 | 69.376 | 57.949 | 1.00 | 0.00 | O |
| ATOM | 2524 | N LYS    | 163 | 30.761 | 68.286 | 59.697 | 1.00 | 0.00 | N |
| ATOM | 2525 | H LYS    | 163 | 30.701 | 67.449 | 60.260 | 1.00 | 0.00 | H |
| ATOM | 2526 | CA LYS   | 163 | 31.715 | 69.328 | 60.148 | 1.00 | 0.00 | C |
| ATOM | 2527 | HA LYS   | 163 | 31.183 | 70.283 | 60.165 | 1.00 | 0.00 | H |
| ATOM | 2528 | CB LYS   | 163 | 32.161 | 69.011 | 61.594 | 1.00 | 0.00 | C |
| ATOM | 2529 | HB2 LYS  | 163 | 32.728 | 68.078 | 61.601 | 1.00 | 0.00 | H |
| ATOM | 2530 | HB3 LYS  | 163 | 32.817 | 69.810 | 61.944 | 1.00 | 0.00 | H |
| ATOM | 2531 | CG LYS   | 163 | 30.985 | 68.900 | 62.580 | 1.00 | 0.00 | C |
| ATOM | 2532 | HG2 LYS  | 163 | 30.392 | 69.814 | 62.526 | 1.00 | 0.00 | H |
| ATOM | 2533 | HG3 LYS  | 163 | 30.352 | 68.054 | 62.307 | 1.00 | 0.00 | H |
| ATOM | 2534 | CD LYS   | 163 | 31.472 | 68.703 | 64.023 | 1.00 | 0.00 | C |
| ATOM | 2535 | HD2 LYS  | 163 | 32.047 | 67.777 | 64.096 | 1.00 | 0.00 | H |
| ATOM | 2536 | HD3 LYS  | 163 | 32.103 | 69.547 | 64.307 | 1.00 | 0.00 | H |
| ATOM | 2537 | CE LYS   | 163 | 30.253 | 68.637 | 64.948 | 1.00 | 0.00 | C |
| ATOM | 2538 | HE2 LYS  | 163 | 29.640 | 69.525 | 64.765 | 1.00 | 0.00 | H |
| ATOM | 2539 | HE3 LYS  | 163 | 29.651 | 67.760 | 64.690 | 1.00 | 0.00 | H |
| ATOM | 2540 | NZ LYS   | 163 | 30.631 | 68.591 | 66.379 | 1.00 | 0.00 | N |
| ATOM | 2541 | HZ1 LYS  | 163 | 31.064 | 67.714 | 66.654 | 1.00 | 0.00 | H |
| ATOM | 2542 | HZ2 LYS  | 163 | 29.798 | 68.688 | 66.952 | 1.00 | 0.00 | H |
| ATOM | 2543 | HZ3 LYS  | 163 | 31.251 | 69.354 | 66.640 | 1.00 | 0.00 | H |
| ATOM | 2544 | C LYS    | 163 | 32.934 | 69.565 | 59.226 | 1.00 | 0.00 | C |
| ATOM | 2545 | O LYS    | 163 | 33.953 | 70.085 | 59.684 | 1.00 | 0.00 | O |
| ATOM | 2546 | N ALA    | 164 | 32.854 | 69.158 | 57.957 | 1.00 | 0.00 | N |

|      |      |      |     |     |        |        |        |      |      |   |
|------|------|------|-----|-----|--------|--------|--------|------|------|---|
| ATOM | 2547 | H    | ALA | 164 | 31.939 | 68.903 | 57.621 | 1.00 | 0.00 | H |
| ATOM | 2548 | CA   | ALA | 164 | 34.003 | 68.927 | 57.073 | 1.00 | 0.00 | C |
| ATOM | 2549 | HA   | ALA | 164 | 34.578 | 68.111 | 57.513 | 1.00 | 0.00 | H |
| ATOM | 2550 | CB   | ALA | 164 | 33.491 | 68.451 | 55.709 | 1.00 | 0.00 | C |
| ATOM | 2551 | HB1  | ALA | 164 | 32.900 | 67.547 | 55.832 | 1.00 | 0.00 | H |
| ATOM | 2552 | HB2  | ALA | 164 | 34.337 | 68.224 | 55.058 | 1.00 | 0.00 | H |
| ATOM | 2553 | HB3  | ALA | 164 | 32.880 | 69.228 | 55.246 | 1.00 | 0.00 | H |
| ATOM | 2554 | C    | ALA | 164 | 34.965 | 70.123 | 56.915 | 1.00 | 0.00 | C |
| ATOM | 2555 | O    | ALA | 164 | 34.551 | 71.286 | 56.885 | 1.00 | 0.00 | O |
| ATOM | 2556 | N    | ARG | 165 | 36.258 | 69.821 | 56.752 | 1.00 | 0.00 | N |
| ATOM | 2557 | H    | ARG | 165 | 36.497 | 68.830 | 56.739 | 1.00 | 0.00 | H |
| ATOM | 2558 | CA   | ARG | 165 | 37.370 | 70.785 | 56.688 | 1.00 | 0.00 | C |
| ATOM | 2559 | HA   | ARG | 165 | 36.966 | 71.795 | 56.610 | 1.00 | 0.00 | H |
| ATOM | 2560 | CB   | ARG | 165 | 38.148 | 70.687 | 58.019 | 1.00 | 0.00 | C |
| ATOM | 2561 | HB2  | ARG | 165 | 37.465 | 70.938 | 58.833 | 1.00 | 0.00 | H |
| ATOM | 2562 | HB3  | ARG | 165 | 38.475 | 69.655 | 58.164 | 1.00 | 0.00 | H |
| ATOM | 2563 | CG   | ARG | 165 | 39.377 | 71.603 | 58.115 | 1.00 | 0.00 | C |
| ATOM | 2564 | HG2  | ARG | 165 | 40.105 | 71.287 | 57.367 | 1.00 | 0.00 | H |
| ATOM | 2565 | HG3  | ARG | 165 | 39.086 | 72.634 | 57.910 | 1.00 | 0.00 | H |
| ATOM | 2566 | CD   | ARG | 165 | 40.015 | 71.527 | 59.516 | 1.00 | 0.00 | C |
| ATOM | 2567 | HD2  | ARG | 165 | 39.358 | 72.027 | 60.230 | 1.00 | 0.00 | H |
| ATOM | 2568 | HD3  | ARG | 165 | 40.097 | 70.482 | 59.822 | 1.00 | 0.00 | H |
| ATOM | 2569 | NE   | ARG | 165 | 41.352 | 72.159 | 59.547 | 1.00 | 0.00 | N |
| ATOM | 2570 | HE   | ARG | 165 | 41.428 | 73.088 | 59.941 | 1.00 | 0.00 | H |
| ATOM | 2571 | CZ   | ARG | 165 | 42.446 | 71.643 | 59.010 | 1.00 | 0.00 | C |
| ATOM | 2572 | NH1  | ARG | 165 | 42.504 | 70.421 | 58.570 | 1.00 | 0.00 | N |
| ATOM | 2573 | HH11 | ARG | 165 | 41.769 | 69.744 | 58.814 | 1.00 | 0.00 | H |
| ATOM | 2574 | HH12 | ARG | 165 | 43.317 | 70.072 | 58.102 | 1.00 | 0.00 | H |
| ATOM | 2575 | NH2  | ARG | 165 | 43.526 | 72.358 | 58.892 | 1.00 | 0.00 | N |
| ATOM | 2576 | HH21 | ARG | 165 | 43.589 | 73.279 | 59.302 | 1.00 | 0.00 | H |
| ATOM | 2577 | HH22 | ARG | 165 | 44.317 | 72.011 | 58.365 | 1.00 | 0.00 | H |
| ATOM | 2578 | C    | ARG | 165 | 38.232 | 70.525 | 55.447 | 1.00 | 0.00 | C |
| ATOM | 2579 | O    | ARG | 165 | 38.640 | 69.396 | 55.196 | 1.00 | 0.00 | O |
| ATOM | 2580 | N    | PHE | 166 | 38.501 | 71.554 | 54.644 | 1.00 | 0.00 | N |
| ATOM | 2581 | H    | PHE | 166 | 38.139 | 72.463 | 54.882 | 1.00 | 0.00 | H |
| ATOM | 2582 | CA   | PHE | 166 | 39.387 | 71.445 | 53.476 | 1.00 | 0.00 | C |
| ATOM | 2583 | HA   | PHE | 166 | 39.088 | 70.578 | 52.884 | 1.00 | 0.00 | H |
| ATOM | 2584 | CB   | PHE | 166 | 39.215 | 72.691 | 52.600 | 1.00 | 0.00 | C |
| ATOM | 2585 | HB2  | PHE | 166 | 38.200 | 72.699 | 52.201 | 1.00 | 0.00 | H |
| ATOM | 2586 | HB3  | PHE | 166 | 39.328 | 73.577 | 53.226 | 1.00 | 0.00 | H |
| ATOM | 2587 | CG   | PHE | 166 | 40.189 | 72.796 | 51.442 | 1.00 | 0.00 | C |
| ATOM | 2588 | CD1  | PHE | 166 | 39.956 | 72.087 | 50.249 | 1.00 | 0.00 | C |
| ATOM | 2589 | HD1  | PHE | 166 | 39.090 | 71.446 | 50.159 | 1.00 | 0.00 | H |
| ATOM | 2590 | CE1  | PHE | 166 | 40.846 | 72.220 | 49.168 | 1.00 | 0.00 | C |
| ATOM | 2591 | HE1  | PHE | 166 | 40.669 | 71.685 | 48.247 | 1.00 | 0.00 | H |
| ATOM | 2592 | CZ   | PHE | 166 | 41.974 | 73.051 | 49.281 | 1.00 | 0.00 | C |
| ATOM | 2593 | HZ   | PHE | 166 | 42.653 | 73.156 | 48.448 | 1.00 | 0.00 | H |
| ATOM | 2594 | CE2  | PHE | 166 | 42.227 | 73.731 | 50.484 | 1.00 | 0.00 | C |
| ATOM | 2595 | HE2  | PHE | 166 | 43.107 | 74.349 | 50.585 | 1.00 | 0.00 | H |
| ATOM | 2596 | CD2  | PHE | 166 | 41.333 | 73.608 | 51.561 | 1.00 | 0.00 | C |
| ATOM | 2597 | HD2  | PHE | 166 | 41.528 | 74.144 | 52.480 | 1.00 | 0.00 | H |
| ATOM | 2598 | C    | PHE | 166 | 40.852 | 71.236 | 53.894 | 1.00 | 0.00 | C |

|      |      |      |     |     |        |        |        |      |      |   |
|------|------|------|-----|-----|--------|--------|--------|------|------|---|
| ATOM | 2599 | O    | PHE | 166 | 41.324 | 71.885 | 54.829 | 1.00 | 0.00 | O |
| ATOM | 2600 | N    | MET | 167 | 41.566 | 70.351 | 53.187 | 1.00 | 0.00 | N |
| ATOM | 2601 | H    | MET | 167 | 41.100 | 69.865 | 52.427 | 1.00 | 0.00 | H |
| ATOM | 2602 | CA   | MET | 167 | 42.954 | 69.962 | 53.486 | 1.00 | 0.00 | C |
| ATOM | 2603 | HA   | MET | 167 | 43.305 | 70.534 | 54.345 | 1.00 | 0.00 | H |
| ATOM | 2604 | CB   | MET | 167 | 42.997 | 68.467 | 53.852 | 1.00 | 0.00 | C |
| ATOM | 2605 | HB2  | MET | 167 | 42.215 | 67.929 | 53.314 | 1.00 | 0.00 | H |
| ATOM | 2606 | HB3  | MET | 167 | 43.953 | 68.037 | 53.553 | 1.00 | 0.00 | H |
| ATOM | 2607 | CG   | MET | 167 | 42.817 | 68.250 | 55.358 | 1.00 | 0.00 | C |
| ATOM | 2608 | HG2  | MET | 167 | 41.897 | 68.743 | 55.675 | 1.00 | 0.00 | H |
| ATOM | 2609 | HG3  | MET | 167 | 42.703 | 67.181 | 55.537 | 1.00 | 0.00 | H |
| ATOM | 2610 | SD   | MET | 167 | 44.187 | 68.850 | 56.398 | 1.00 | 0.00 | S |
| ATOM | 2611 | CE   | MET | 167 | 45.516 | 67.724 | 55.905 | 1.00 | 0.00 | C |
| ATOM | 2612 | HE1  | MET | 167 | 45.807 | 67.923 | 54.873 | 1.00 | 0.00 | H |
| ATOM | 2613 | HE2  | MET | 167 | 46.379 | 67.874 | 56.553 | 1.00 | 0.00 | H |
| ATOM | 2614 | HE3  | MET | 167 | 45.174 | 66.693 | 55.999 | 1.00 | 0.00 | H |
| ATOM | 2615 | C    | MET | 167 | 43.963 | 70.266 | 52.369 | 1.00 | 0.00 | C |
| ATOM | 2616 | O    | MET | 167 | 45.153 | 70.395 | 52.667 | 1.00 | 0.00 | O |
| ATOM | 2617 | N    | GLY | 168 | 43.541 | 70.397 | 51.107 | 1.00 | 0.00 | N |
| ATOM | 2618 | H    | GLY | 168 | 42.563 | 70.261 | 50.886 | 1.00 | 0.00 | H |
| ATOM | 2619 | CA   | GLY | 168 | 44.446 | 70.822 | 50.033 | 1.00 | 0.00 | C |
| ATOM | 2620 | HA2  | GLY | 168 | 44.608 | 71.895 | 50.126 | 1.00 | 0.00 | H |
| ATOM | 2621 | HA3  | GLY | 168 | 45.412 | 70.331 | 50.159 | 1.00 | 0.00 | H |
| ATOM | 2622 | C    | GLY | 168 | 43.985 | 70.534 | 48.605 | 1.00 | 0.00 | C |
| ATOM | 2623 | O    | GLY | 168 | 42.958 | 69.892 | 48.374 | 1.00 | 0.00 | O |
| ATOM | 2624 | N    | GLN | 169 | 44.785 | 71.011 | 47.648 | 1.00 | 0.00 | N |
| ATOM | 2625 | H    | GLN | 169 | 45.611 | 71.523 | 47.953 | 1.00 | 0.00 | H |
| ATOM | 2626 | CA   | GLN | 169 | 44.764 | 70.592 | 46.244 | 1.00 | 0.00 | C |
| ATOM | 2627 | HA   | GLN | 169 | 43.858 | 70.023 | 46.051 | 1.00 | 0.00 | H |
| ATOM | 2628 | CB   | GLN | 169 | 44.791 | 71.811 | 45.306 | 1.00 | 0.00 | C |
| ATOM | 2629 | HB2  | GLN | 169 | 45.481 | 72.568 | 45.685 | 1.00 | 0.00 | H |
| ATOM | 2630 | HB3  | GLN | 169 | 45.141 | 71.489 | 44.325 | 1.00 | 0.00 | H |
| ATOM | 2631 | CG   | GLN | 169 | 43.390 | 72.404 | 45.138 | 1.00 | 0.00 | C |
| ATOM | 2632 | HG2  | GLN | 169 | 42.718 | 71.591 | 44.863 | 1.00 | 0.00 | H |
| ATOM | 2633 | HG3  | GLN | 169 | 43.051 | 72.825 | 46.084 | 1.00 | 0.00 | H |
| ATOM | 2634 | CD   | GLN | 169 | 43.286 | 73.474 | 44.053 | 1.00 | 0.00 | C |
| ATOM | 2635 | OE1  | GLN | 169 | 44.254 | 74.014 | 43.538 | 1.00 | 0.00 | O |
| ATOM | 2636 | NE2  | GLN | 169 | 42.083 | 73.817 | 43.657 | 1.00 | 0.00 | N |
| ATOM | 2637 | HE21 | GLN | 169 | 42.013 | 74.488 | 42.915 | 1.00 | 0.00 | H |
| ATOM | 2638 | HE22 | GLN | 169 | 41.286 | 73.336 | 44.068 | 1.00 | 0.00 | H |
| ATOM | 2639 | C    | GLN | 169 | 45.959 | 69.682 | 45.949 | 1.00 | 0.00 | C |
| ATOM | 2640 | O    | GLN | 169 | 47.090 | 70.028 | 46.284 | 1.00 | 0.00 | O |
| ATOM | 2641 | N    | ILE | 170 | 45.722 | 68.541 | 45.294 | 1.00 | 0.00 | N |
| ATOM | 2642 | H    | ILE | 170 | 44.764 | 68.310 | 45.055 | 1.00 | 0.00 | H |
| ATOM | 2643 | CA   | ILE | 170 | 46.780 | 67.577 | 44.942 | 1.00 | 0.00 | C |
| ATOM | 2644 | HA   | ILE | 170 | 47.737 | 68.099 | 44.991 | 1.00 | 0.00 | H |
| ATOM | 2645 | CB   | ILE | 170 | 46.863 | 66.418 | 45.964 | 1.00 | 0.00 | C |
| ATOM | 2646 | HB   | ILE | 170 | 47.739 | 65.827 | 45.690 | 1.00 | 0.00 | H |
| ATOM | 2647 | CG2  | ILE | 170 | 47.110 | 66.948 | 47.387 | 1.00 | 0.00 | C |
| ATOM | 2648 | HG21 | ILE | 170 | 47.939 | 67.658 | 47.383 | 1.00 | 0.00 | H |
| ATOM | 2649 | HG22 | ILE | 170 | 47.364 | 66.131 | 48.057 | 1.00 | 0.00 | H |
| ATOM | 2650 | HG23 | ILE | 170 | 46.220 | 67.449 | 47.770 | 1.00 | 0.00 | H |

|      |      |      |     |     |        |        |        |      |      |   |
|------|------|------|-----|-----|--------|--------|--------|------|------|---|
| ATOM | 2651 | CG1  | ILE | 170 | 45.640 | 65.477 | 45.921 | 1.00 | 0.00 | C |
| ATOM | 2652 | HG12 | ILE | 170 | 44.770 | 65.981 | 46.344 | 1.00 | 0.00 | H |
| ATOM | 2653 | HG13 | ILE | 170 | 45.412 | 65.216 | 44.888 | 1.00 | 0.00 | H |
| ATOM | 2654 | CD1  | ILE | 170 | 45.887 | 64.166 | 46.678 | 1.00 | 0.00 | C |
| ATOM | 2655 | HD11 | ILE | 170 | 46.765 | 63.660 | 46.274 | 1.00 | 0.00 | H |
| ATOM | 2656 | HD12 | ILE | 170 | 45.023 | 63.521 | 46.554 | 1.00 | 0.00 | H |
| ATOM | 2657 | HD13 | ILE | 170 | 46.030 | 64.351 | 47.741 | 1.00 | 0.00 | H |
| ATOM | 2658 | C    | ILE | 170 | 46.667 | 67.080 | 43.495 | 1.00 | 0.00 | C |
| ATOM | 2659 | O    | ILE | 170 | 45.604 | 67.150 | 42.878 | 1.00 | 0.00 | O |
| ATOM | 2660 | N    | GLU | 171 | 47.777 | 66.569 | 42.959 | 1.00 | 0.00 | N |
| ATOM | 2661 | H    | GLU | 171 | 48.597 | 66.493 | 43.540 | 1.00 | 0.00 | H |
| ATOM | 2662 | CA   | GLU | 171 | 47.925 | 66.128 | 41.566 | 1.00 | 0.00 | C |
| ATOM | 2663 | HA   | GLU | 171 | 46.962 | 66.204 | 41.058 | 1.00 | 0.00 | H |
| ATOM | 2664 | CB   | GLU | 171 | 48.921 | 67.035 | 40.816 | 1.00 | 0.00 | C |
| ATOM | 2665 | HB2  | GLU | 171 | 49.868 | 67.047 | 41.359 | 1.00 | 0.00 | H |
| ATOM | 2666 | HB3  | GLU | 171 | 49.096 | 66.617 | 39.824 | 1.00 | 0.00 | H |
| ATOM | 2667 | CG   | GLU | 171 | 48.410 | 68.477 | 40.656 | 1.00 | 0.00 | C |
| ATOM | 2668 | HG2  | GLU | 171 | 47.508 | 68.458 | 40.041 | 1.00 | 0.00 | H |
| ATOM | 2669 | HG3  | GLU | 171 | 48.142 | 68.868 | 41.639 | 1.00 | 0.00 | H |
| ATOM | 2670 | CD   | GLU | 171 | 49.431 | 69.435 | 40.023 | 1.00 | 0.00 | C |
| ATOM | 2671 | OE1  | GLU | 171 | 49.236 | 70.666 | 40.166 | 1.00 | 0.00 | O |
| ATOM | 2672 | OE2  | GLU | 171 | 50.419 | 68.983 | 39.395 | 1.00 | 0.00 | O |
| ATOM | 2673 | C    | GLU | 171 | 48.381 | 64.661 | 41.483 | 1.00 | 0.00 | C |
| ATOM | 2674 | O    | GLU | 171 | 49.247 | 64.220 | 42.238 | 1.00 | 0.00 | O |
| ATOM | 2675 | N    | ALA | 172 | 47.800 | 63.920 | 40.540 | 1.00 | 0.00 | N |
| ATOM | 2676 | H    | ALA | 172 | 47.112 | 64.366 | 39.948 | 1.00 | 0.00 | H |
| ATOM | 2677 | CA   | ALA | 172 | 48.141 | 62.550 | 40.148 | 1.00 | 0.00 | C |
| ATOM | 2678 | HA   | ALA | 172 | 49.225 | 62.448 | 40.069 | 1.00 | 0.00 | H |
| ATOM | 2679 | CB   | ALA | 172 | 47.606 | 61.573 | 41.209 | 1.00 | 0.00 | C |
| ATOM | 2680 | HB1  | ALA | 172 | 48.067 | 61.787 | 42.174 | 1.00 | 0.00 | H |
| ATOM | 2681 | HB2  | ALA | 172 | 47.852 | 60.548 | 40.930 | 1.00 | 0.00 | H |
| ATOM | 2682 | HB3  | ALA | 172 | 46.524 | 61.674 | 41.299 | 1.00 | 0.00 | H |
| ATOM | 2683 | C    | ALA | 172 | 47.508 | 62.271 | 38.769 | 1.00 | 0.00 | C |
| ATOM | 2684 | O    | ALA | 172 | 46.681 | 63.071 | 38.312 | 1.00 | 0.00 | O |
| ATOM | 2685 | N    | LYS | 173 | 47.804 | 61.114 | 38.140 | 1.00 | 0.00 | N |
| ATOM | 2686 | H    | LYS | 173 | 48.501 | 60.514 | 38.558 | 1.00 | 0.00 | H |
| ATOM | 2687 | CA   | LYS | 173 | 47.261 | 60.755 | 36.801 | 1.00 | 0.00 | C |
| ATOM | 2688 | HA   | LYS | 173 | 47.627 | 59.764 | 36.529 | 1.00 | 0.00 | H |
| ATOM | 2689 | CB   | LYS | 173 | 45.719 | 60.693 | 36.954 | 1.00 | 0.00 | C |
| ATOM | 2690 | HB2  | LYS | 173 | 45.474 | 60.794 | 38.014 | 1.00 | 0.00 | H |
| ATOM | 2691 | HB3  | LYS | 173 | 45.285 | 61.559 | 36.458 | 1.00 | 0.00 | H |
| ATOM | 2692 | CG   | LYS | 173 | 44.986 | 59.418 | 36.512 | 1.00 | 0.00 | C |
| ATOM | 2693 | HG2  | LYS | 173 | 44.880 | 59.392 | 35.432 | 1.00 | 0.00 | H |
| ATOM | 2694 | HG3  | LYS | 173 | 45.544 | 58.536 | 36.832 | 1.00 | 0.00 | H |
| ATOM | 2695 | CD   | LYS | 173 | 43.577 | 59.363 | 37.122 | 1.00 | 0.00 | C |
| ATOM | 2696 | HD2  | LYS | 173 | 42.999 | 58.637 | 36.552 | 1.00 | 0.00 | H |
| ATOM | 2697 | HD3  | LYS | 173 | 43.648 | 59.017 | 38.155 | 1.00 | 0.00 | H |
| ATOM | 2698 | CE   | LYS | 173 | 42.848 | 60.712 | 37.095 | 1.00 | 0.00 | C |
| ATOM | 2699 | HE2  | LYS | 173 | 43.389 | 61.426 | 37.723 | 1.00 | 0.00 | H |
| ATOM | 2700 | HE3  | LYS | 173 | 42.859 | 61.074 | 36.068 | 1.00 | 0.00 | H |
| ATOM | 2701 | NZ   | LYS | 173 | 41.459 | 60.577 | 37.570 | 1.00 | 0.00 | N |
| ATOM | 2702 | HZ1  | LYS | 173 | 41.411 | 60.101 | 38.460 | 1.00 | 0.00 | H |

|      |      |     |     |     |        |        |        |      |      |   |
|------|------|-----|-----|-----|--------|--------|--------|------|------|---|
| ATOM | 2703 | HZ2 | LYS | 173 | 40.953 | 59.906 | 36.976 | 1.00 | 0.00 | H |
| ATOM | 2704 | HZ3 | LYS | 173 | 40.934 | 61.435 | 37.573 | 1.00 | 0.00 | H |
| ATOM | 2705 | C   | LYS | 173 | 47.803 | 61.741 | 35.722 | 1.00 | 0.00 | C |
| ATOM | 2706 | O   | LYS | 173 | 48.612 | 62.603 | 36.034 | 1.00 | 0.00 | O |
| ATOM | 2707 | N   | GLY | 174 | 47.461 | 61.701 | 34.432 | 1.00 | 0.00 | N |
| ATOM | 2708 | H   | GLY | 174 | 48.032 | 62.314 | 33.866 | 1.00 | 0.00 | H |
| ATOM | 2709 | CA  | GLY | 174 | 46.463 | 60.898 | 33.710 | 1.00 | 0.00 | C |
| ATOM | 2710 | HA2 | GLY | 174 | 46.834 | 60.752 | 32.694 | 1.00 | 0.00 | H |
| ATOM | 2711 | HA3 | GLY | 174 | 46.386 | 59.907 | 34.150 | 1.00 | 0.00 | H |
| ATOM | 2712 | C   | GLY | 174 | 45.067 | 61.545 | 33.578 | 1.00 | 0.00 | C |
| ATOM | 2713 | O   | GLY | 174 | 44.160 | 60.932 | 33.030 | 1.00 | 0.00 | O |
| ATOM | 2714 | N   | LYS | 175 | 44.900 | 62.787 | 34.063 | 1.00 | 0.00 | N |
| ATOM | 2715 | H   | LYS | 175 | 45.711 | 63.166 | 34.526 | 1.00 | 0.00 | H |
| ATOM | 2716 | CA  | LYS | 175 | 43.779 | 63.719 | 33.761 | 1.00 | 0.00 | C |
| ATOM | 2717 | HA  | LYS | 175 | 43.395 | 63.481 | 32.767 | 1.00 | 0.00 | H |
| ATOM | 2718 | CB  | LYS | 175 | 42.619 | 63.583 | 34.780 | 1.00 | 0.00 | C |
| ATOM | 2719 | HB2 | LYS | 175 | 43.044 | 63.418 | 35.771 | 1.00 | 0.00 | H |
| ATOM | 2720 | HB3 | LYS | 175 | 42.071 | 64.527 | 34.824 | 1.00 | 0.00 | H |
| ATOM | 2721 | CG  | LYS | 175 | 41.587 | 62.471 | 34.481 | 1.00 | 0.00 | C |
| ATOM | 2722 | HG2 | LYS | 175 | 42.106 | 61.541 | 34.267 | 1.00 | 0.00 | H |
| ATOM | 2723 | HG3 | LYS | 175 | 40.981 | 62.316 | 35.373 | 1.00 | 0.00 | H |
| ATOM | 2724 | CD  | LYS | 175 | 40.630 | 62.789 | 33.322 | 1.00 | 0.00 | C |
| ATOM | 2725 | HD2 | LYS | 175 | 39.915 | 63.554 | 33.630 | 1.00 | 0.00 | H |
| ATOM | 2726 | HD3 | LYS | 175 | 41.204 | 63.189 | 32.485 | 1.00 | 0.00 | H |
| ATOM | 2727 | CE  | LYS | 175 | 39.878 | 61.552 | 32.804 | 1.00 | 0.00 | C |
| ATOM | 2728 | HE2 | LYS | 175 | 39.371 | 61.842 | 31.879 | 1.00 | 0.00 | H |
| ATOM | 2729 | HE3 | LYS | 175 | 40.599 | 60.777 | 32.532 | 1.00 | 0.00 | H |
| ATOM | 2730 | NZ  | LYS | 175 | 38.856 | 60.994 | 33.728 | 1.00 | 0.00 | N |
| ATOM | 2731 | HZ1 | LYS | 175 | 38.298 | 60.307 | 33.213 | 1.00 | 0.00 | H |
| ATOM | 2732 | HZ2 | LYS | 175 | 38.202 | 61.708 | 34.032 | 1.00 | 0.00 | H |
| ATOM | 2733 | HZ3 | LYS | 175 | 39.240 | 60.499 | 34.534 | 1.00 | 0.00 | H |
| ATOM | 2734 | C   | LYS | 175 | 44.242 | 65.189 | 33.658 | 1.00 | 0.00 | C |
| ATOM | 2735 | O   | LYS | 175 | 43.593 | 65.967 | 32.967 | 1.00 | 0.00 | O |
| ATOM | 2736 | N   | ALA | 176 | 45.388 | 65.526 | 34.268 | 1.00 | 0.00 | N |
| ATOM | 2737 | H   | ALA | 176 | 45.817 | 64.842 | 34.863 | 1.00 | 0.00 | H |
| ATOM | 2738 | CA  | ALA | 176 | 46.128 | 66.791 | 34.124 | 1.00 | 0.00 | C |
| ATOM | 2739 | HA  | ALA | 176 | 47.024 | 66.663 | 34.732 | 1.00 | 0.00 | H |
| ATOM | 2740 | CB  | ALA | 176 | 46.639 | 66.936 | 32.680 | 1.00 | 0.00 | C |
| ATOM | 2741 | HB1 | ALA | 176 | 47.145 | 66.022 | 32.365 | 1.00 | 0.00 | H |
| ATOM | 2742 | HB2 | ALA | 176 | 47.349 | 67.763 | 32.622 | 1.00 | 0.00 | H |
| ATOM | 2743 | HB3 | ALA | 176 | 45.808 | 67.145 | 32.005 | 1.00 | 0.00 | H |
| ATOM | 2744 | C   | ALA | 176 | 45.475 | 68.068 | 34.712 | 1.00 | 0.00 | C |
| ATOM | 2745 | O   | ALA | 176 | 45.715 | 69.169 | 34.215 | 1.00 | 0.00 | O |
| ATOM | 2746 | N   | GLU | 177 | 44.708 | 67.940 | 35.801 | 1.00 | 0.00 | N |
| ATOM | 2747 | H   | GLU | 177 | 44.554 | 67.021 | 36.184 | 1.00 | 0.00 | H |
| ATOM | 2748 | CA  | GLU | 177 | 44.161 | 69.060 | 36.591 | 1.00 | 0.00 | C |
| ATOM | 2749 | HA  | GLU | 177 | 44.829 | 69.914 | 36.488 | 1.00 | 0.00 | H |
| ATOM | 2750 | CB  | GLU | 177 | 42.786 | 69.455 | 36.007 | 1.00 | 0.00 | C |
| ATOM | 2751 | HB2 | GLU | 177 | 42.892 | 69.656 | 34.939 | 1.00 | 0.00 | H |
| ATOM | 2752 | HB3 | GLU | 177 | 42.130 | 68.588 | 36.104 | 1.00 | 0.00 | H |
| ATOM | 2753 | CG  | GLU | 177 | 42.062 | 70.651 | 36.655 | 1.00 | 0.00 | C |
| ATOM | 2754 | HG2 | GLU | 177 | 41.006 | 70.572 | 36.386 | 1.00 | 0.00 | H |



|      |      |      |     |     |        |        |        |      |      |   |
|------|------|------|-----|-----|--------|--------|--------|------|------|---|
| ATOM | 2755 | HG3  | GLU | 177 | 42.114 | 70.570 | 37.742 | 1.00 | 0.00 | H |
| ATOM | 2756 | CD   | GLU | 177 | 42.554 | 72.043 | 36.214 | 1.00 | 0.00 | C |
| ATOM | 2757 | OE1  | GLU | 177 | 43.700 | 72.193 | 35.729 | 1.00 | 0.00 | O |
| ATOM | 2758 | OE2  | GLU | 177 | 41.786 | 73.020 | 36.397 | 1.00 | 0.00 | O |
| ATOM | 2759 | C    | GLU | 177 | 44.089 | 68.651 | 38.087 | 1.00 | 0.00 | C |
| ATOM | 2760 | O    | GLU | 177 | 43.774 | 67.487 | 38.365 | 1.00 | 0.00 | O |
| ATOM | 2761 | N    | PRO | 178 | 44.412 | 69.537 | 39.056 | 1.00 | 0.00 | N |
| ATOM | 2762 | CD   | PRO | 178 | 44.891 | 70.901 | 38.866 | 1.00 | 0.00 | C |
| ATOM | 2763 | HD2  | PRO | 178 | 44.274 | 71.461 | 38.168 | 1.00 | 0.00 | H |
| ATOM | 2764 | HD3  | PRO | 178 | 45.922 | 70.874 | 38.512 | 1.00 | 0.00 | H |
| ATOM | 2765 | CG   | PRO | 178 | 44.843 | 71.562 | 40.241 | 1.00 | 0.00 | C |
| ATOM | 2766 | HG2  | PRO | 178 | 43.840 | 71.950 | 40.430 | 1.00 | 0.00 | H |
| ATOM | 2767 | HG3  | PRO | 178 | 45.588 | 72.353 | 40.337 | 1.00 | 0.00 | H |
| ATOM | 2768 | CB   | PRO | 178 | 45.130 | 70.390 | 41.175 | 1.00 | 0.00 | C |
| ATOM | 2769 | HB2  | PRO | 178 | 44.747 | 70.572 | 42.179 | 1.00 | 0.00 | H |
| ATOM | 2770 | HB3  | PRO | 178 | 46.204 | 70.214 | 41.209 | 1.00 | 0.00 | H |
| ATOM | 2771 | CA   | PRO | 178 | 44.431 | 69.210 | 40.488 | 1.00 | 0.00 | C |
| ATOM | 2772 | HA   | PRO | 178 | 45.028 | 68.310 | 40.638 | 1.00 | 0.00 | H |
| ATOM | 2773 | C    | PRO | 178 | 43.039 | 68.972 | 41.095 | 1.00 | 0.00 | C |
| ATOM | 2774 | O    | PRO | 178 | 42.035 | 69.522 | 40.643 | 1.00 | 0.00 | O |
| ATOM | 2775 | N    | LEU | 179 | 42.991 | 68.190 | 42.180 | 1.00 | 0.00 | N |
| ATOM | 2776 | H    | LEU | 179 | 43.869 | 67.798 | 42.510 | 1.00 | 0.00 | H |
| ATOM | 2777 | CA   | LEU | 179 | 41.764 | 67.798 | 42.883 | 1.00 | 0.00 | C |
| ATOM | 2778 | HA   | LEU | 179 | 40.903 | 68.193 | 42.343 | 1.00 | 0.00 | H |
| ATOM | 2779 | CB   | LEU | 179 | 41.659 | 66.260 | 42.901 | 1.00 | 0.00 | C |
| ATOM | 2780 | HB2  | LEU | 179 | 42.468 | 65.874 | 43.524 | 1.00 | 0.00 | H |
| ATOM | 2781 | HB3  | LEU | 179 | 40.719 | 65.991 | 43.378 | 1.00 | 0.00 | H |
| ATOM | 2782 | CG   | LEU | 179 | 41.739 | 65.557 | 41.530 | 1.00 | 0.00 | C |
| ATOM | 2783 | HG   | LEU | 179 | 42.702 | 65.764 | 41.064 | 1.00 | 0.00 | H |
| ATOM | 2784 | CD1  | LEU | 179 | 41.624 | 64.043 | 41.733 | 1.00 | 0.00 | C |
| ATOM | 2785 | HD11 | LEU | 179 | 42.427 | 63.703 | 42.388 | 1.00 | 0.00 | H |
| ATOM | 2786 | HD12 | LEU | 179 | 41.722 | 63.539 | 40.773 | 1.00 | 0.00 | H |
| ATOM | 2787 | HD13 | LEU | 179 | 40.662 | 63.793 | 42.181 | 1.00 | 0.00 | H |
| ATOM | 2788 | CD2  | LEU | 179 | 40.620 | 65.986 | 40.579 | 1.00 | 0.00 | C |
| ATOM | 2789 | HD21 | LEU | 179 | 39.645 | 65.781 | 41.013 | 1.00 | 0.00 | H |
| ATOM | 2790 | HD22 | LEU | 179 | 40.711 | 67.050 | 40.359 | 1.00 | 0.00 | H |
| ATOM | 2791 | HD23 | LEU | 179 | 40.719 | 65.449 | 39.636 | 1.00 | 0.00 | H |
| ATOM | 2792 | C    | LEU | 179 | 41.710 | 68.357 | 44.317 | 1.00 | 0.00 | C |
| ATOM | 2793 | O    | LEU | 179 | 42.661 | 68.188 | 45.079 | 1.00 | 0.00 | O |
| ATOM | 2794 | N    | ASN | 180 | 40.577 | 68.963 | 44.699 | 1.00 | 0.00 | N |
| ATOM | 2795 | H    | ASN | 180 | 39.864 | 69.107 | 44.004 | 1.00 | 0.00 | H |
| ATOM | 2796 | CA   | ASN | 180 | 40.285 | 69.389 | 46.079 | 1.00 | 0.00 | C |
| ATOM | 2797 | HA   | ASN | 180 | 41.151 | 69.934 | 46.463 | 1.00 | 0.00 | H |
| ATOM | 2798 | CB   | ASN | 180 | 39.056 | 70.328 | 46.104 | 1.00 | 0.00 | C |
| ATOM | 2799 | HB2  | ASN | 180 | 38.207 | 69.799 | 45.681 | 1.00 | 0.00 | H |
| ATOM | 2800 | HB3  | ASN | 180 | 38.812 | 70.566 | 47.139 | 1.00 | 0.00 | H |
| ATOM | 2801 | CG   | ASN | 180 | 39.193 | 71.650 | 45.365 | 1.00 | 0.00 | C |
| ATOM | 2802 | OD1  | ASN | 180 | 40.270 | 72.162 | 45.120 | 1.00 | 0.00 | O |
| ATOM | 2803 | ND2  | ASN | 180 | 38.092 | 72.256 | 44.988 | 1.00 | 0.00 | N |
| ATOM | 2804 | HD21 | ASN | 180 | 37.190 | 71.866 | 45.190 | 1.00 | 0.00 | H |
| ATOM | 2805 | HD22 | ASN | 180 | 38.190 | 73.168 | 44.551 | 1.00 | 0.00 | H |
| ATOM | 2806 | C    | ASN | 180 | 40.030 | 68.179 | 47.009 | 1.00 | 0.00 | C |

|      |      |      |     |     |        |        |        |      |      |   |
|------|------|------|-----|-----|--------|--------|--------|------|------|---|
| ATOM | 2807 | O    | ASN | 180 | 39.288 | 67.259 | 46.636 | 1.00 | 0.00 | O |
| ATOM | 2808 | N    | LEU | 181 | 40.575 | 68.220 | 48.232 | 1.00 | 0.00 | N |
| ATOM | 2809 | H    | LEU | 181 | 41.201 | 68.992 | 48.445 | 1.00 | 0.00 | H |
| ATOM | 2810 | CA   | LEU | 181 | 40.551 | 67.121 | 49.207 | 1.00 | 0.00 | C |
| ATOM | 2811 | HA   | LEU | 181 | 39.766 | 66.428 | 48.910 | 1.00 | 0.00 | H |
| ATOM | 2812 | CB   | LEU | 181 | 41.918 | 66.412 | 49.129 | 1.00 | 0.00 | C |
| ATOM | 2813 | HB2  | LEU | 181 | 42.237 | 66.359 | 48.086 | 1.00 | 0.00 | H |
| ATOM | 2814 | HB3  | LEU | 181 | 42.650 | 67.024 | 49.660 | 1.00 | 0.00 | H |
| ATOM | 2815 | CG   | LEU | 181 | 41.936 | 64.988 | 49.705 | 1.00 | 0.00 | C |
| ATOM | 2816 | HG   | LEU | 181 | 41.517 | 64.983 | 50.710 | 1.00 | 0.00 | H |
| ATOM | 2817 | CD1  | LEU | 181 | 41.143 | 64.032 | 48.815 | 1.00 | 0.00 | C |
| ATOM | 2818 | HD11 | LEU | 181 | 40.112 | 64.349 | 48.740 | 1.00 | 0.00 | H |
| ATOM | 2819 | HD12 | LEU | 181 | 41.158 | 63.035 | 49.246 | 1.00 | 0.00 | H |
| ATOM | 2820 | HD13 | LEU | 181 | 41.568 | 64.016 | 47.813 | 1.00 | 0.00 | H |
| ATOM | 2821 | CD2  | LEU | 181 | 43.374 | 64.476 | 49.766 | 1.00 | 0.00 | C |
| ATOM | 2822 | HD21 | LEU | 181 | 43.827 | 64.527 | 48.778 | 1.00 | 0.00 | H |
| ATOM | 2823 | HD22 | LEU | 181 | 43.953 | 65.089 | 50.457 | 1.00 | 0.00 | H |
| ATOM | 2824 | HD23 | LEU | 181 | 43.386 | 63.442 | 50.109 | 1.00 | 0.00 | H |
| ATOM | 2825 | C    | LEU | 181 | 40.219 | 67.591 | 50.642 | 1.00 | 0.00 | C |
| ATOM | 2826 | O    | LEU | 181 | 40.620 | 68.686 | 51.045 | 1.00 | 0.00 | O |
| ATOM | 2827 | N    | TYR | 182 | 39.491 | 66.766 | 51.410 | 1.00 | 0.00 | N |
| ATOM | 2828 | H    | TYR | 182 | 39.195 | 65.881 | 51.014 | 1.00 | 0.00 | H |
| ATOM | 2829 | CA   | TYR | 182 | 38.828 | 67.165 | 52.665 | 1.00 | 0.00 | C |
| ATOM | 2830 | HA   | TYR | 182 | 39.306 | 68.071 | 53.038 | 1.00 | 0.00 | H |
| ATOM | 2831 | CB   | TYR | 182 | 37.349 | 67.504 | 52.389 | 1.00 | 0.00 | C |
| ATOM | 2832 | HB2  | TYR | 182 | 36.835 | 66.584 | 52.107 | 1.00 | 0.00 | H |
| ATOM | 2833 | HB3  | TYR | 182 | 36.892 | 67.845 | 53.319 | 1.00 | 0.00 | H |
| ATOM | 2834 | CG   | TYR | 182 | 37.071 | 68.541 | 51.309 | 1.00 | 0.00 | C |
| ATOM | 2835 | CD1  | TYR | 182 | 36.655 | 69.845 | 51.649 | 1.00 | 0.00 | C |
| ATOM | 2836 | HD1  | TYR | 182 | 36.563 | 70.128 | 52.689 | 1.00 | 0.00 | H |
| ATOM | 2837 | CE1  | TYR | 182 | 36.311 | 70.769 | 50.639 | 1.00 | 0.00 | C |
| ATOM | 2838 | HE1  | TYR | 182 | 35.959 | 71.757 | 50.898 | 1.00 | 0.00 | H |
| ATOM | 2839 | CZ   | TYR | 182 | 36.403 | 70.394 | 49.281 | 1.00 | 0.00 | C |
| ATOM | 2840 | OH   | TYR | 182 | 36.011 | 71.239 | 48.288 | 1.00 | 0.00 | O |
| ATOM | 2841 | HH   | TYR | 182 | 35.782 | 70.731 | 47.494 | 1.00 | 0.00 | H |
| ATOM | 2842 | CE2  | TYR | 182 | 36.864 | 69.106 | 48.945 | 1.00 | 0.00 | C |
| ATOM | 2843 | HE2  | TYR | 182 | 36.978 | 68.829 | 47.913 | 1.00 | 0.00 | H |
| ATOM | 2844 | CD2  | TYR | 182 | 37.155 | 68.173 | 49.952 | 1.00 | 0.00 | C |
| ATOM | 2845 | HD2  | TYR | 182 | 37.441 | 67.166 | 49.682 | 1.00 | 0.00 | H |
| ATOM | 2846 | C    | TYR | 182 | 38.918 | 66.116 | 53.797 | 1.00 | 0.00 | C |
| ATOM | 2847 | O    | TYR | 182 | 39.101 | 64.921 | 53.557 | 1.00 | 0.00 | O |
| ATOM | 2848 | N    | GLU | 183 | 38.751 | 66.606 | 55.027 | 1.00 | 0.00 | N |
| ATOM | 2849 | H    | GLU | 183 | 38.580 | 67.605 | 55.079 | 1.00 | 0.00 | H |
| ATOM | 2850 | CA   | GLU | 183 | 38.744 | 65.945 | 56.345 | 1.00 | 0.00 | C |
| ATOM | 2851 | HA   | GLU | 183 | 38.988 | 64.888 | 56.238 | 1.00 | 0.00 | H |
| ATOM | 2852 | CB   | GLU | 183 | 39.835 | 66.648 | 57.188 | 1.00 | 0.00 | C |
| ATOM | 2853 | HB2  | GLU | 183 | 40.755 | 66.677 | 56.604 | 1.00 | 0.00 | H |
| ATOM | 2854 | HB3  | GLU | 183 | 39.503 | 67.678 | 57.316 | 1.00 | 0.00 | H |
| ATOM | 2855 | CG   | GLU | 183 | 40.195 | 66.065 | 58.573 | 1.00 | 0.00 | C |
| ATOM | 2856 | HG2  | GLU | 183 | 39.378 | 65.459 | 58.955 | 1.00 | 0.00 | H |
| ATOM | 2857 | HG3  | GLU | 183 | 41.047 | 65.395 | 58.449 | 1.00 | 0.00 | H |
| ATOM | 2858 | CD   | GLU | 183 | 40.544 | 67.139 | 59.627 | 1.00 | 0.00 | C |

|      |      |      |     |     |        |        |        |      |      |   |
|------|------|------|-----|-----|--------|--------|--------|------|------|---|
| ATOM | 2859 | OE1  | GLU | 183 | 41.007 | 68.241 | 59.246 | 1.00 | 0.00 | O |
| ATOM | 2860 | OE2  | GLU | 183 | 40.383 | 66.852 | 60.840 | 1.00 | 0.00 | O |
| ATOM | 2861 | C    | GLU | 183 | 37.349 | 66.081 | 57.012 | 1.00 | 0.00 | C |
| ATOM | 2862 | O    | GLU | 183 | 36.550 | 66.931 | 56.603 | 1.00 | 0.00 | O |
| ATOM | 2863 | N    | ILE | 184 | 37.060 | 65.281 | 58.051 | 1.00 | 0.00 | N |
| ATOM | 2864 | H    | ILE | 184 | 37.796 | 64.682 | 58.402 | 1.00 | 0.00 | H |
| ATOM | 2865 | CA   | ILE | 184 | 35.831 | 65.297 | 58.880 | 1.00 | 0.00 | C |
| ATOM | 2866 | HA   | ILE | 184 | 35.324 | 66.252 | 58.756 | 1.00 | 0.00 | H |
| ATOM | 2867 | CB   | ILE | 184 | 34.866 | 64.163 | 58.448 | 1.00 | 0.00 | C |
| ATOM | 2868 | HB   | ILE | 184 | 35.392 | 63.210 | 58.551 | 1.00 | 0.00 | H |
| ATOM | 2869 | CG2  | ILE | 184 | 33.624 | 64.123 | 59.363 | 1.00 | 0.00 | C |
| ATOM | 2870 | HG21 | ILE | 184 | 33.922 | 63.955 | 60.397 | 1.00 | 0.00 | H |
| ATOM | 2871 | HG22 | ILE | 184 | 32.968 | 63.296 | 59.096 | 1.00 | 0.00 | H |
| ATOM | 2872 | HG23 | ILE | 184 | 33.083 | 65.067 | 59.296 | 1.00 | 0.00 | H |
| ATOM | 2873 | CG1  | ILE | 184 | 34.453 | 64.336 | 56.968 | 1.00 | 0.00 | C |
| ATOM | 2874 | HG12 | ILE | 184 | 33.986 | 65.312 | 56.840 | 1.00 | 0.00 | H |
| ATOM | 2875 | HG13 | ILE | 184 | 35.342 | 64.305 | 56.339 | 1.00 | 0.00 | H |
| ATOM | 2876 | CD1  | ILE | 184 | 33.507 | 63.251 | 56.442 | 1.00 | 0.00 | C |
| ATOM | 2877 | HD11 | ILE | 184 | 33.952 | 62.267 | 56.588 | 1.00 | 0.00 | H |
| ATOM | 2878 | HD12 | ILE | 184 | 33.332 | 63.414 | 55.382 | 1.00 | 0.00 | H |
| ATOM | 2879 | HD13 | ILE | 184 | 32.545 | 63.305 | 56.948 | 1.00 | 0.00 | H |
| ATOM | 2880 | C    | ILE | 184 | 36.191 | 65.222 | 60.368 | 1.00 | 0.00 | C |
| ATOM | 2881 | O    | ILE | 184 | 37.166 | 64.515 | 60.712 | 1.00 | 0.00 | O |
| ATOM | 2882 | OXT  | ILE | 184 | 35.485 | 65.836 | 61.194 | 1.00 | 0.00 | O |
| TER  | 2883 |      | ILE | 184 |        |        |        |      |      |   |
| ATOM | 2883 | N    | LEU | 185 | 40.791 | 23.668 | 52.151 | 1.00 | 0.00 | N |
| ATOM | 2884 | H1   | LEU | 185 | 40.219 | 23.897 | 51.346 | 1.00 | 0.00 | H |
| ATOM | 2885 | H2   | LEU | 185 | 41.746 | 23.614 | 51.829 | 1.00 | 0.00 | H |
| ATOM | 2886 | H3   | LEU | 185 | 40.512 | 22.754 | 52.487 | 1.00 | 0.00 | H |
| ATOM | 2887 | CA   | LEU | 185 | 40.644 | 24.689 | 53.219 | 1.00 | 0.00 | C |
| ATOM | 2888 | HA   | LEU | 185 | 40.801 | 25.664 | 52.758 | 1.00 | 0.00 | H |
| ATOM | 2889 | CB   | LEU | 185 | 39.242 | 24.721 | 53.865 | 1.00 | 0.00 | C |
| ATOM | 2890 | HB2  | LEU | 185 | 39.074 | 23.794 | 54.412 | 1.00 | 0.00 | H |
| ATOM | 2891 | HB3  | LEU | 185 | 39.224 | 25.533 | 54.595 | 1.00 | 0.00 | H |
| ATOM | 2892 | CG   | LEU | 185 | 38.078 | 24.929 | 52.876 | 1.00 | 0.00 | C |
| ATOM | 2893 | HG   | LEU | 185 | 38.067 | 24.109 | 52.157 | 1.00 | 0.00 | H |
| ATOM | 2894 | CD1  | LEU | 185 | 36.748 | 24.932 | 53.628 | 1.00 | 0.00 | C |
| ATOM | 2895 | HD11 | LEU | 185 | 36.620 | 23.989 | 54.161 | 1.00 | 0.00 | H |
| ATOM | 2896 | HD12 | LEU | 185 | 35.920 | 25.049 | 52.928 | 1.00 | 0.00 | H |
| ATOM | 2897 | HD13 | LEU | 185 | 36.719 | 25.751 | 54.348 | 1.00 | 0.00 | H |
| ATOM | 2898 | CD2  | LEU | 185 | 38.207 | 26.249 | 52.112 | 1.00 | 0.00 | C |
| ATOM | 2899 | HD21 | LEU | 185 | 38.260 | 27.081 | 52.816 | 1.00 | 0.00 | H |
| ATOM | 2900 | HD22 | LEU | 185 | 39.092 | 26.247 | 51.477 | 1.00 | 0.00 | H |
| ATOM | 2901 | HD23 | LEU | 185 | 37.331 | 26.384 | 51.476 | 1.00 | 0.00 | H |
| ATOM | 2902 | C    | LEU | 185 | 41.738 | 24.573 | 54.280 | 1.00 | 0.00 | C |
| ATOM | 2903 | O    | LEU | 185 | 42.472 | 25.539 | 54.434 | 1.00 | 0.00 | O |
| ATOM | 2904 | N    | LYS | 186 | 41.896 | 23.426 | 54.962 | 1.00 | 0.00 | N |
| ATOM | 2905 | H    | LYS | 186 | 41.267 | 22.659 | 54.727 | 1.00 | 0.00 | H |
| ATOM | 2906 | CA   | LYS | 186 | 42.746 | 23.190 | 56.163 | 1.00 | 0.00 | C |
| ATOM | 2907 | HA   | LYS | 186 | 42.454 | 23.912 | 56.929 | 1.00 | 0.00 | H |
| ATOM | 2908 | CB   | LYS | 186 | 42.424 | 21.775 | 56.703 | 1.00 | 0.00 | C |
| ATOM | 2909 | HB2  | LYS | 186 | 42.611 | 21.057 | 55.903 | 1.00 | 0.00 | H |

|      |      |         |     |        |        |        |      |      |   |
|------|------|---------|-----|--------|--------|--------|------|------|---|
| ATOM | 2910 | HB3 LYS | 186 | 43.090 | 21.528 | 57.532 | 1.00 | 0.00 | H |
| ATOM | 2911 | CG LYS  | 186 | 40.979 | 21.617 | 57.216 | 1.00 | 0.00 | C |
| ATOM | 2912 | HG2 LYS | 186 | 40.896 | 22.067 | 58.206 | 1.00 | 0.00 | H |
| ATOM | 2913 | HG3 LYS | 186 | 40.290 | 22.137 | 56.552 | 1.00 | 0.00 | H |
| ATOM | 2914 | CD LYS  | 186 | 40.564 | 20.137 | 57.281 | 1.00 | 0.00 | C |
| ATOM | 2915 | HD2 LYS | 186 | 40.764 | 19.674 | 56.313 | 1.00 | 0.00 | H |
| ATOM | 2916 | HD3 LYS | 186 | 41.140 | 19.618 | 58.049 | 1.00 | 0.00 | H |
| ATOM | 2917 | CE LYS  | 186 | 39.065 | 20.037 | 57.584 | 1.00 | 0.00 | C |
| ATOM | 2918 | HE2 LYS | 186 | 38.898 | 20.220 | 58.649 | 1.00 | 0.00 | H |
| ATOM | 2919 | HE3 LYS | 186 | 38.550 | 20.822 | 57.023 | 1.00 | 0.00 | H |
| ATOM | 2920 | NZ LYS  | 186 | 38.496 | 18.728 | 57.184 | 1.00 | 0.00 | N |
| ATOM | 2921 | HZ1 LYS | 186 | 38.874 | 17.946 | 57.716 | 1.00 | 0.00 | H |
| ATOM | 2922 | HZ2 LYS | 186 | 38.612 | 18.571 | 56.186 | 1.00 | 0.00 | H |
| ATOM | 2923 | HZ3 LYS | 186 | 37.487 | 18.741 | 57.323 | 1.00 | 0.00 | H |
| ATOM | 2924 | C LYS   | 186 | 44.278 | 23.381 | 56.005 | 1.00 | 0.00 | C |
| ATOM | 2925 | O LYS   | 186 | 45.046 | 22.915 | 56.843 | 1.00 | 0.00 | O |
| ATOM | 2926 | N SER   | 187 | 44.753 | 24.058 | 54.958 | 1.00 | 0.00 | N |
| ATOM | 2927 | H SER   | 187 | 44.073 | 24.555 | 54.402 | 1.00 | 0.00 | H |
| ATOM | 2928 | CA SER  | 187 | 46.168 | 24.412 | 54.785 | 1.00 | 0.00 | C |
| ATOM | 2929 | HA SER  | 187 | 46.782 | 23.514 | 54.871 | 1.00 | 0.00 | H |
| ATOM | 2930 | CB SER  | 187 | 46.393 | 25.021 | 53.392 | 1.00 | 0.00 | C |
| ATOM | 2931 | HB2 SER | 187 | 46.201 | 24.260 | 52.634 | 1.00 | 0.00 | H |
| ATOM | 2932 | HB3 SER | 187 | 45.683 | 25.836 | 53.246 | 1.00 | 0.00 | H |
| ATOM | 2933 | OG SER  | 187 | 47.715 | 25.520 | 53.224 | 1.00 | 0.00 | O |
| ATOM | 2934 | HG SER  | 187 | 47.971 | 26.048 | 53.996 | 1.00 | 0.00 | H |
| ATOM | 2935 | C SER   | 187 | 46.601 | 25.423 | 55.847 | 1.00 | 0.00 | C |
| ATOM | 2936 | O SER   | 187 | 46.202 | 26.586 | 55.790 | 1.00 | 0.00 | O |
| ATOM | 2937 | N HID   | 188 | 47.497 | 25.026 | 56.752 | 1.00 | 0.00 | N |
| ATOM | 2938 | H HID   | 188 | 47.770 | 24.054 | 56.785 | 1.00 | 0.00 | H |
| ATOM | 2939 | CA HID  | 188 | 48.217 | 25.986 | 57.591 | 1.00 | 0.00 | C |
| ATOM | 2940 | HA HID  | 188 | 47.477 | 26.571 | 58.140 | 1.00 | 0.00 | H |
| ATOM | 2941 | CB HID  | 188 | 49.117 | 25.271 | 58.613 | 1.00 | 0.00 | C |
| ATOM | 2942 | HB2 HID | 188 | 50.021 | 24.931 | 58.106 | 1.00 | 0.00 | H |
| ATOM | 2943 | HB3 HID | 188 | 49.425 | 25.990 | 59.374 | 1.00 | 0.00 | H |
| ATOM | 2944 | CG HID  | 188 | 48.490 | 24.082 | 59.299 | 1.00 | 0.00 | C |
| ATOM | 2945 | ND1 HID | 188 | 47.271 | 24.048 | 59.937 | 1.00 | 0.00 | N |
| ATOM | 2946 | HD1 HID | 188 | 46.621 | 24.816 | 60.034 | 1.00 | 0.00 | H |
| ATOM | 2947 | CE1 HID | 188 | 47.054 | 22.795 | 60.362 | 1.00 | 0.00 | C |
| ATOM | 2948 | HE1 HID | 188 | 46.161 | 22.470 | 60.885 | 1.00 | 0.00 | H |
| ATOM | 2949 | NE2 HID | 188 | 48.093 | 21.999 | 60.040 | 1.00 | 0.00 | N |
| ATOM | 2950 | CD2 HID | 188 | 49.000 | 22.812 | 59.342 | 1.00 | 0.00 | C |
| ATOM | 2951 | HD2 HID | 188 | 49.939 | 22.494 | 58.905 | 1.00 | 0.00 | H |
| ATOM | 2952 | C HID   | 188 | 49.035 | 26.948 | 56.712 | 1.00 | 0.00 | C |
| ATOM | 2953 | O HID   | 188 | 49.493 | 26.566 | 55.628 | 1.00 | 0.00 | O |
| ATOM | 2954 | N ALA   | 189 | 49.208 | 28.189 | 57.166 | 1.00 | 0.00 | N |
| ATOM | 2955 | H ALA   | 189 | 48.827 | 28.440 | 58.063 | 1.00 | 0.00 | H |
| ATOM | 2956 | CA ALA  | 189 | 50.016 | 29.185 | 56.468 | 1.00 | 0.00 | C |
| ATOM | 2957 | HA ALA  | 189 | 49.713 | 29.195 | 55.420 | 1.00 | 0.00 | H |
| ATOM | 2958 | CB ALA  | 189 | 49.713 | 30.560 | 57.071 | 1.00 | 0.00 | C |
| ATOM | 2959 | HB1 ALA | 189 | 50.273 | 31.328 | 56.537 | 1.00 | 0.00 | H |
| ATOM | 2960 | HB2 ALA | 189 | 49.999 | 30.579 | 58.124 | 1.00 | 0.00 | H |
| ATOM | 2961 | HB3 ALA | 189 | 48.648 | 30.777 | 56.979 | 1.00 | 0.00 | H |

|      |      |      |     |     |        |        |        |      |      |   |
|------|------|------|-----|-----|--------|--------|--------|------|------|---|
| ATOM | 2962 | C    | ALA | 189 | 51.523 | 28.860 | 56.517 | 1.00 | 0.00 | C |
| ATOM | 2963 | O    | ALA | 189 | 51.993 | 28.176 | 57.428 | 1.00 | 0.00 | O |
| ATOM | 2964 | N    | THR | 190 | 52.292 | 29.405 | 55.571 | 1.00 | 0.00 | N |
| ATOM | 2965 | H    | THR | 190 | 51.833 | 29.958 | 54.851 | 1.00 | 0.00 | H |
| ATOM | 2966 | CA   | THR | 190 | 53.762 | 29.322 | 55.547 | 1.00 | 0.00 | C |
| ATOM | 2967 | HA   | THR | 190 | 54.115 | 29.024 | 56.534 | 1.00 | 0.00 | H |
| ATOM | 2968 | CB   | THR | 190 | 54.305 | 28.284 | 54.541 | 1.00 | 0.00 | C |
| ATOM | 2969 | HB   | THR | 190 | 55.390 | 28.260 | 54.649 | 1.00 | 0.00 | H |
| ATOM | 2970 | CG2  | THR | 190 | 53.782 | 26.871 | 54.778 | 1.00 | 0.00 | C |
| ATOM | 2971 | HG21 | THR | 190 | 53.959 | 26.581 | 55.814 | 1.00 | 0.00 | H |
| ATOM | 2972 | HG22 | THR | 190 | 54.314 | 26.183 | 54.124 | 1.00 | 0.00 | H |
| ATOM | 2973 | HG23 | THR | 190 | 52.713 | 26.821 | 54.567 | 1.00 | 0.00 | H |
| ATOM | 2974 | OG1  | THR | 190 | 54.014 | 28.629 | 53.197 | 1.00 | 0.00 | O |
| ATOM | 2975 | HG1  | THR | 190 | 54.014 | 29.602 | 53.172 | 1.00 | 0.00 | H |
| ATOM | 2976 | C    | THR | 190 | 54.386 | 30.672 | 55.216 | 1.00 | 0.00 | C |
| ATOM | 2977 | O    | THR | 190 | 54.059 | 31.263 | 54.187 | 1.00 | 0.00 | O |
| ATOM | 2978 | N    | VAL | 191 | 55.353 | 31.100 | 56.027 | 1.00 | 0.00 | N |
| ATOM | 2979 | H    | VAL | 191 | 55.567 | 30.545 | 56.841 | 1.00 | 0.00 | H |
| ATOM | 2980 | CA   | VAL | 191 | 56.391 | 32.056 | 55.608 | 1.00 | 0.00 | C |
| ATOM | 2981 | HA   | VAL | 191 | 55.929 | 32.942 | 55.175 | 1.00 | 0.00 | H |
| ATOM | 2982 | CB   | VAL | 191 | 57.226 | 32.484 | 56.832 | 1.00 | 0.00 | C |
| ATOM | 2983 | HB   | VAL | 191 | 57.577 | 31.590 | 57.351 | 1.00 | 0.00 | H |
| ATOM | 2984 | CG1  | VAL | 191 | 58.439 | 33.341 | 56.486 | 1.00 | 0.00 | C |
| ATOM | 2985 | HG11 | VAL | 191 | 58.121 | 34.249 | 55.973 | 1.00 | 0.00 | H |
| ATOM | 2986 | HG12 | VAL | 191 | 58.977 | 33.619 | 57.391 | 1.00 | 0.00 | H |
| ATOM | 2987 | HG13 | VAL | 191 | 59.127 | 32.795 | 55.840 | 1.00 | 0.00 | H |
| ATOM | 2988 | CG2  | VAL | 191 | 56.360 | 33.301 | 57.799 | 1.00 | 0.00 | C |
| ATOM | 2989 | HG21 | VAL | 191 | 55.498 | 32.719 | 58.109 | 1.00 | 0.00 | H |
| ATOM | 2990 | HG22 | VAL | 191 | 56.023 | 34.216 | 57.312 | 1.00 | 0.00 | H |
| ATOM | 2991 | HG23 | VAL | 191 | 56.943 | 33.560 | 58.684 | 1.00 | 0.00 | H |
| ATOM | 2992 | C    | VAL | 191 | 57.252 | 31.376 | 54.534 | 1.00 | 0.00 | C |
| ATOM | 2993 | O    | VAL | 191 | 57.660 | 30.228 | 54.734 | 1.00 | 0.00 | O |
| ATOM | 2994 | N    | ARG | 192 | 57.458 | 32.016 | 53.377 | 1.00 | 0.00 | N |
| ATOM | 2995 | H    | ARG | 192 | 57.099 | 32.964 | 53.283 | 1.00 | 0.00 | H |
| ATOM | 2996 | CA   | ARG | 192 | 58.191 | 31.445 | 52.237 | 1.00 | 0.00 | C |
| ATOM | 2997 | HA   | ARG | 192 | 59.065 | 30.927 | 52.636 | 1.00 | 0.00 | H |
| ATOM | 2998 | CB   | ARG | 192 | 57.285 | 30.441 | 51.505 | 1.00 | 0.00 | C |
| ATOM | 2999 | HB2  | ARG | 192 | 56.686 | 29.901 | 52.239 | 1.00 | 0.00 | H |
| ATOM | 3000 | HB3  | ARG | 192 | 56.601 | 30.982 | 50.848 | 1.00 | 0.00 | H |
| ATOM | 3001 | CG   | ARG | 192 | 58.089 | 29.412 | 50.692 | 1.00 | 0.00 | C |
| ATOM | 3002 | HG2  | ARG | 192 | 58.820 | 29.917 | 50.061 | 1.00 | 0.00 | H |
| ATOM | 3003 | HG3  | ARG | 192 | 58.620 | 28.753 | 51.380 | 1.00 | 0.00 | H |
| ATOM | 3004 | CD   | ARG | 192 | 57.186 | 28.573 | 49.784 | 1.00 | 0.00 | C |
| ATOM | 3005 | HD2  | ARG | 192 | 56.841 | 29.207 | 48.965 | 1.00 | 0.00 | H |
| ATOM | 3006 | HD3  | ARG | 192 | 57.776 | 27.758 | 49.356 | 1.00 | 0.00 | H |
| ATOM | 3007 | NE   | ARG | 192 | 56.019 | 28.029 | 50.505 | 1.00 | 0.00 | N |
| ATOM | 3008 | HE   | ARG | 192 | 55.967 | 28.199 | 51.496 | 1.00 | 0.00 | H |
| ATOM | 3009 | CZ   | ARG | 192 | 54.997 | 27.406 | 49.959 | 1.00 | 0.00 | C |
| ATOM | 3010 | NH1  | ARG | 192 | 54.970 | 27.089 | 48.695 | 1.00 | 0.00 | N |
| ATOM | 3011 | HH11 | ARG | 192 | 55.781 | 27.331 | 48.103 | 1.00 | 0.00 | H |
| ATOM | 3012 | HH12 | ARG | 192 | 54.187 | 26.639 | 48.278 | 1.00 | 0.00 | H |
| ATOM | 3013 | NH2  | ARG | 192 | 53.967 | 27.108 | 50.701 | 1.00 | 0.00 | N |

|      |      |      |     |     |        |        |        |      |      |   |
|------|------|------|-----|-----|--------|--------|--------|------|------|---|
| ATOM | 3014 | HH21 | ARG | 192 | 53.942 | 27.434 | 51.664 | 1.00 | 0.00 | H |
| ATOM | 3015 | HH22 | ARG | 192 | 53.194 | 26.597 | 50.327 | 1.00 | 0.00 | H |
| ATOM | 3016 | C    | ARG | 192 | 58.668 | 32.512 | 51.249 | 1.00 | 0.00 | C |
| ATOM | 3017 | O    | ARG | 192 | 57.905 | 33.386 | 50.844 | 1.00 | 0.00 | O |
| ATOM | 3018 | N    | PHE | 193 | 59.893 | 32.359 | 50.752 | 1.00 | 0.00 | N |
| ATOM | 3019 | H    | PHE | 193 | 60.487 | 31.655 | 51.154 | 1.00 | 0.00 | H |
| ATOM | 3020 | CA   | PHE | 193 | 60.437 | 33.191 | 49.678 | 1.00 | 0.00 | C |
| ATOM | 3021 | HA   | PHE | 193 | 60.294 | 34.229 | 49.963 | 1.00 | 0.00 | H |
| ATOM | 3022 | CB   | PHE | 193 | 61.951 | 32.953 | 49.560 | 1.00 | 0.00 | C |
| ATOM | 3023 | HB2  | PHE | 193 | 62.117 | 31.972 | 49.114 | 1.00 | 0.00 | H |
| ATOM | 3024 | HB3  | PHE | 193 | 62.371 | 33.702 | 48.889 | 1.00 | 0.00 | H |
| ATOM | 3025 | CG   | PHE | 193 | 62.695 | 33.025 | 50.883 | 1.00 | 0.00 | C |
| ATOM | 3026 | CD1  | PHE | 193 | 63.279 | 31.867 | 51.433 | 1.00 | 0.00 | C |
| ATOM | 3027 | HD1  | PHE | 193 | 63.241 | 30.928 | 50.899 | 1.00 | 0.00 | H |
| ATOM | 3028 | CE1  | PHE | 193 | 63.907 | 31.923 | 52.690 | 1.00 | 0.00 | C |
| ATOM | 3029 | HE1  | PHE | 193 | 64.342 | 31.032 | 53.119 | 1.00 | 0.00 | H |
| ATOM | 3030 | CZ   | PHE | 193 | 63.955 | 33.134 | 53.400 | 1.00 | 0.00 | C |
| ATOM | 3031 | HZ   | PHE | 193 | 64.420 | 33.173 | 54.376 | 1.00 | 0.00 | H |
| ATOM | 3032 | CE2  | PHE | 193 | 63.384 | 34.294 | 52.849 | 1.00 | 0.00 | C |
| ATOM | 3033 | HE2  | PHE | 193 | 63.406 | 35.219 | 53.408 | 1.00 | 0.00 | H |
| ATOM | 3034 | CD2  | PHE | 193 | 62.760 | 34.240 | 51.590 | 1.00 | 0.00 | C |
| ATOM | 3035 | HD2  | PHE | 193 | 62.310 | 35.130 | 51.179 | 1.00 | 0.00 | H |
| ATOM | 3036 | C    | PHE | 193 | 59.704 | 32.973 | 48.340 | 1.00 | 0.00 | C |
| ATOM | 3037 | O    | PHE | 193 | 59.660 | 31.858 | 47.812 | 1.00 | 0.00 | O |
| ATOM | 3038 | N    | ALA | 194 | 59.189 | 34.055 | 47.757 | 1.00 | 0.00 | N |
| ATOM | 3039 | H    | ALA | 194 | 59.293 | 34.947 | 48.232 | 1.00 | 0.00 | H |
| ATOM | 3040 | CA   | ALA | 194 | 58.441 | 34.071 | 46.502 | 1.00 | 0.00 | C |
| ATOM | 3041 | HA   | ALA | 194 | 58.503 | 33.094 | 46.027 | 1.00 | 0.00 | H |
| ATOM | 3042 | CB   | ALA | 194 | 56.966 | 34.319 | 46.823 | 1.00 | 0.00 | C |
| ATOM | 3043 | HB1  | ALA | 194 | 56.862 | 35.268 | 47.350 | 1.00 | 0.00 | H |
| ATOM | 3044 | HB2  | ALA | 194 | 56.588 | 33.512 | 47.452 | 1.00 | 0.00 | H |
| ATOM | 3045 | HB3  | ALA | 194 | 56.380 | 34.351 | 45.904 | 1.00 | 0.00 | H |
| ATOM | 3046 | C    | ALA | 194 | 58.991 | 35.108 | 45.509 | 1.00 | 0.00 | C |
| ATOM | 3047 | O    | ALA | 194 | 59.592 | 36.114 | 45.897 | 1.00 | 0.00 | O |
| ATOM | 3048 | N    | THR | 195 | 58.747 | 34.871 | 44.219 | 1.00 | 0.00 | N |
| ATOM | 3049 | H    | THR | 195 | 58.192 | 34.048 | 44.006 | 1.00 | 0.00 | H |
| ATOM | 3050 | CA   | THR | 195 | 58.829 | 35.893 | 43.167 | 1.00 | 0.00 | C |
| ATOM | 3051 | HA   | THR | 195 | 59.507 | 36.688 | 43.476 | 1.00 | 0.00 | H |
| ATOM | 3052 | CB   | THR | 195 | 59.325 | 35.322 | 41.829 | 1.00 | 0.00 | C |
| ATOM | 3053 | HB   | THR | 195 | 58.522 | 34.761 | 41.357 | 1.00 | 0.00 | H |
| ATOM | 3054 | CG2  | THR | 195 | 59.753 | 36.446 | 40.888 | 1.00 | 0.00 | C |
| ATOM | 3055 | HG21 | THR | 195 | 60.191 | 36.020 | 39.988 | 1.00 | 0.00 | H |
| ATOM | 3056 | HG22 | THR | 195 | 60.493 | 37.082 | 41.374 | 1.00 | 0.00 | H |
| ATOM | 3057 | HG23 | THR | 195 | 58.890 | 37.048 | 40.604 | 1.00 | 0.00 | H |
| ATOM | 3058 | OG1  | THR | 195 | 60.432 | 34.463 | 41.991 | 1.00 | 0.00 | O |
| ATOM | 3059 | HG1  | THR | 195 | 60.110 | 33.603 | 42.298 | 1.00 | 0.00 | H |
| ATOM | 3060 | C    | THR | 195 | 57.429 | 36.469 | 42.974 | 1.00 | 0.00 | C |
| ATOM | 3061 | O    | THR | 195 | 56.480 | 35.706 | 42.799 | 1.00 | 0.00 | O |
| ATOM | 3062 | N    | ILE | 196 | 57.280 | 37.790 | 43.010 | 1.00 | 0.00 | N |
| ATOM | 3063 | H    | ILE | 196 | 58.113 | 38.367 | 43.073 | 1.00 | 0.00 | H |
| ATOM | 3064 | CA   | ILE | 196 | 55.993 | 38.489 | 43.007 | 1.00 | 0.00 | C |
| ATOM | 3065 | HA   | ILE | 196 | 55.186 | 37.765 | 42.891 | 1.00 | 0.00 | H |

|      |      |      |     |     |        |        |        |      |      |   |
|------|------|------|-----|-----|--------|--------|--------|------|------|---|
| ATOM | 3066 | CB   | ILE | 196 | 55.780 | 39.235 | 44.340 | 1.00 | 0.00 | C |
| ATOM | 3067 | HB   | ILE | 196 | 56.534 | 40.021 | 44.405 | 1.00 | 0.00 | H |
| ATOM | 3068 | CG2  | ILE | 196 | 54.406 | 39.917 | 44.316 | 1.00 | 0.00 | C |
| ATOM | 3069 | HG21 | ILE | 196 | 54.394 | 40.739 | 43.599 | 1.00 | 0.00 | H |
| ATOM | 3070 | HG22 | ILE | 196 | 54.205 | 40.321 | 45.297 | 1.00 | 0.00 | H |
| ATOM | 3071 | HG23 | ILE | 196 | 53.626 | 39.202 | 44.051 | 1.00 | 0.00 | H |
| ATOM | 3072 | CG1  | ILE | 196 | 55.935 | 38.371 | 45.615 | 1.00 | 0.00 | C |
| ATOM | 3073 | HG12 | ILE | 196 | 56.938 | 37.945 | 45.644 | 1.00 | 0.00 | H |
| ATOM | 3074 | HG13 | ILE | 196 | 55.843 | 39.025 | 46.483 | 1.00 | 0.00 | H |
| ATOM | 3075 | CD1  | ILE | 196 | 54.922 | 37.236 | 45.786 | 1.00 | 0.00 | C |
| ATOM | 3076 | HD11 | ILE | 196 | 53.909 | 37.635 | 45.818 | 1.00 | 0.00 | H |
| ATOM | 3077 | HD12 | ILE | 196 | 55.113 | 36.723 | 46.728 | 1.00 | 0.00 | H |
| ATOM | 3078 | HD13 | ILE | 196 | 55.020 | 36.522 | 44.969 | 1.00 | 0.00 | H |
| ATOM | 3079 | C    | ILE | 196 | 55.924 | 39.467 | 41.834 | 1.00 | 0.00 | C |
| ATOM | 3080 | O    | ILE | 196 | 56.836 | 40.272 | 41.640 | 1.00 | 0.00 | O |
| ATOM | 3081 | N    | MET | 197 | 54.816 | 39.431 | 41.096 | 1.00 | 0.00 | N |
| ATOM | 3082 | H    | MET | 197 | 54.095 | 38.761 | 41.346 | 1.00 | 0.00 | H |
| ATOM | 3083 | CA   | MET | 197 | 54.566 | 40.241 | 39.906 | 1.00 | 0.00 | C |
| ATOM | 3084 | HA   | MET | 197 | 55.400 | 40.925 | 39.754 | 1.00 | 0.00 | H |
| ATOM | 3085 | CB   | MET | 197 | 54.508 | 39.292 | 38.704 | 1.00 | 0.00 | C |
| ATOM | 3086 | HB2  | MET | 197 | 55.450 | 38.743 | 38.687 | 1.00 | 0.00 | H |
| ATOM | 3087 | HB3  | MET | 197 | 53.697 | 38.582 | 38.853 | 1.00 | 0.00 | H |
| ATOM | 3088 | CG   | MET | 197 | 54.354 | 39.949 | 37.329 | 1.00 | 0.00 | C |
| ATOM | 3089 | HG2  | MET | 197 | 55.101 | 40.740 | 37.252 | 1.00 | 0.00 | H |
| ATOM | 3090 | HG3  | MET | 197 | 54.601 | 39.193 | 36.585 | 1.00 | 0.00 | H |
| ATOM | 3091 | SD   | MET | 197 | 52.752 | 40.661 | 36.849 | 1.00 | 0.00 | S |
| ATOM | 3092 | CE   | MET | 197 | 51.628 | 39.247 | 36.848 | 1.00 | 0.00 | C |
| ATOM | 3093 | HE1  | MET | 197 | 50.673 | 39.542 | 36.414 | 1.00 | 0.00 | H |
| ATOM | 3094 | HE2  | MET | 197 | 52.052 | 38.437 | 36.255 | 1.00 | 0.00 | H |
| ATOM | 3095 | HE3  | MET | 197 | 51.457 | 38.926 | 37.874 | 1.00 | 0.00 | H |
| ATOM | 3096 | C    | MET | 197 | 53.292 | 41.075 | 40.056 | 1.00 | 0.00 | C |
| ATOM | 3097 | O    | MET | 197 | 52.288 | 40.591 | 40.586 | 1.00 | 0.00 | O |
| ATOM | 3098 | N    | PHE | 198 | 53.327 | 42.305 | 39.544 | 1.00 | 0.00 | N |
| ATOM | 3099 | H    | PHE | 198 | 54.194 | 42.622 | 39.115 | 1.00 | 0.00 | H |
| ATOM | 3100 | CA   | PHE | 198 | 52.148 | 43.139 | 39.316 | 1.00 | 0.00 | C |
| ATOM | 3101 | HA   | PHE | 198 | 51.254 | 42.519 | 39.377 | 1.00 | 0.00 | H |
| ATOM | 3102 | CB   | PHE | 198 | 52.069 | 44.214 | 40.409 | 1.00 | 0.00 | C |
| ATOM | 3103 | HB2  | PHE | 198 | 52.284 | 43.751 | 41.373 | 1.00 | 0.00 | H |
| ATOM | 3104 | HB3  | PHE | 198 | 52.849 | 44.953 | 40.224 | 1.00 | 0.00 | H |
| ATOM | 3105 | CG   | PHE | 198 | 50.722 | 44.906 | 40.523 | 1.00 | 0.00 | C |
| ATOM | 3106 | CD1  | PHE | 198 | 50.537 | 46.223 | 40.063 | 1.00 | 0.00 | C |
| ATOM | 3107 | HD1  | PHE | 198 | 51.349 | 46.760 | 39.602 | 1.00 | 0.00 | H |
| ATOM | 3108 | CE1  | PHE | 198 | 49.291 | 46.857 | 40.199 | 1.00 | 0.00 | C |
| ATOM | 3109 | HE1  | PHE | 198 | 49.169 | 47.868 | 39.828 | 1.00 | 0.00 | H |
| ATOM | 3110 | CZ   | PHE | 198 | 48.218 | 46.175 | 40.801 | 1.00 | 0.00 | C |
| ATOM | 3111 | HZ   | PHE | 198 | 47.257 | 46.658 | 40.905 | 1.00 | 0.00 | H |
| ATOM | 3112 | CE2  | PHE | 198 | 48.397 | 44.860 | 41.266 | 1.00 | 0.00 | C |
| ATOM | 3113 | HE2  | PHE | 198 | 47.574 | 44.332 | 41.727 | 1.00 | 0.00 | H |
| ATOM | 3114 | CD2  | PHE | 198 | 49.647 | 44.230 | 41.127 | 1.00 | 0.00 | C |
| ATOM | 3115 | HD2  | PHE | 198 | 49.789 | 43.221 | 41.480 | 1.00 | 0.00 | H |
| ATOM | 3116 | C    | PHE | 198 | 52.207 | 43.740 | 37.903 | 1.00 | 0.00 | C |
| ATOM | 3117 | O    | PHE | 198 | 53.270 | 44.179 | 37.461 | 1.00 | 0.00 | O |

|      |      |      |     |     |        |        |        |      |      |   |
|------|------|------|-----|-----|--------|--------|--------|------|------|---|
| ATOM | 3118 | N    | CYS | 199 | 51.086 | 43.768 | 37.184 | 1.00 | 0.00 | N |
| ATOM | 3119 | H    | CYS | 199 | 50.240 | 43.371 | 37.576 | 1.00 | 0.00 | H |
| ATOM | 3120 | CA   | CYS | 199 | 51.000 | 44.351 | 35.840 | 1.00 | 0.00 | C |
| ATOM | 3121 | HA   | CYS | 199 | 51.744 | 45.142 | 35.748 | 1.00 | 0.00 | H |
| ATOM | 3122 | CB   | CYS | 199 | 51.317 | 43.280 | 34.783 | 1.00 | 0.00 | C |
| ATOM | 3123 | HB2  | CYS | 199 | 51.337 | 43.747 | 33.798 | 1.00 | 0.00 | H |
| ATOM | 3124 | HB3  | CYS | 199 | 52.302 | 42.859 | 34.983 | 1.00 | 0.00 | H |
| ATOM | 3125 | SG   | CYS | 199 | 50.082 | 41.947 | 34.775 | 1.00 | 0.00 | S |
| ATOM | 3126 | HG   | CYS | 199 | 50.328 | 41.543 | 36.028 | 1.00 | 0.00 | H |
| ATOM | 3127 | C    | CYS | 199 | 49.634 | 45.001 | 35.612 | 1.00 | 0.00 | C |
| ATOM | 3128 | O    | CYS | 199 | 48.635 | 44.534 | 36.163 | 1.00 | 0.00 | O |
| ATOM | 3129 | N    | ASP | 200 | 49.582 | 46.079 | 34.823 | 1.00 | 0.00 | N |
| ATOM | 3130 | H    | ASP | 200 | 50.433 | 46.400 | 34.371 | 1.00 | 0.00 | H |
| ATOM | 3131 | CA   | ASP | 200 | 48.334 | 46.791 | 34.527 | 1.00 | 0.00 | C |
| ATOM | 3132 | HA   | ASP | 200 | 47.576 | 46.017 | 34.380 | 1.00 | 0.00 | H |
| ATOM | 3133 | CB   | ASP | 200 | 47.883 | 47.576 | 35.782 | 1.00 | 0.00 | C |
| ATOM | 3134 | HB2  | ASP | 200 | 46.813 | 47.422 | 35.855 | 1.00 | 0.00 | H |
| ATOM | 3135 | HB3  | ASP | 200 | 48.296 | 47.117 | 36.681 | 1.00 | 0.00 | H |
| ATOM | 3136 | CG   | ASP | 200 | 48.089 | 49.086 | 35.900 | 1.00 | 0.00 | C |
| ATOM | 3137 | OD1  | ASP | 200 | 47.638 | 49.613 | 36.950 | 1.00 | 0.00 | O |
| ATOM | 3138 | OD2  | ASP | 200 | 48.315 | 49.839 | 34.931 | 1.00 | 0.00 | O |
| ATOM | 3139 | C    | ASP | 200 | 48.349 | 47.574 | 33.194 | 1.00 | 0.00 | C |
| ATOM | 3140 | O    | ASP | 200 | 49.383 | 47.730 | 32.538 | 1.00 | 0.00 | O |
| ATOM | 3141 | N    | ILE | 201 | 47.166 | 47.996 | 32.740 | 1.00 | 0.00 | N |
| ATOM | 3142 | H    | ILE | 201 | 46.367 | 47.893 | 33.352 | 1.00 | 0.00 | H |
| ATOM | 3143 | CA   | ILE | 201 | 46.946 | 48.653 | 31.443 | 1.00 | 0.00 | C |
| ATOM | 3144 | HA   | ILE | 201 | 47.571 | 48.168 | 30.691 | 1.00 | 0.00 | H |
| ATOM | 3145 | CB   | ILE | 201 | 45.473 | 48.471 | 31.015 | 1.00 | 0.00 | C |
| ATOM | 3146 | HB   | ILE | 201 | 44.843 | 48.808 | 31.839 | 1.00 | 0.00 | H |
| ATOM | 3147 | CG2  | ILE | 201 | 45.138 | 49.328 | 29.779 | 1.00 | 0.00 | C |
| ATOM | 3148 | HG21 | ILE | 201 | 45.172 | 50.390 | 30.027 | 1.00 | 0.00 | H |
| ATOM | 3149 | HG22 | ILE | 201 | 44.138 | 49.108 | 29.413 | 1.00 | 0.00 | H |
| ATOM | 3150 | HG23 | ILE | 201 | 45.857 | 49.127 | 28.984 | 1.00 | 0.00 | H |
| ATOM | 3151 | CG1  | ILE | 201 | 45.175 | 46.976 | 30.746 | 1.00 | 0.00 | C |
| ATOM | 3152 | HG12 | ILE | 201 | 45.592 | 46.688 | 29.781 | 1.00 | 0.00 | H |
| ATOM | 3153 | HG13 | ILE | 201 | 45.653 | 46.355 | 31.503 | 1.00 | 0.00 | H |
| ATOM | 3154 | CD1  | ILE | 201 | 43.681 | 46.634 | 30.787 | 1.00 | 0.00 | C |
| ATOM | 3155 | HD11 | ILE | 201 | 43.290 | 46.813 | 31.789 | 1.00 | 0.00 | H |
| ATOM | 3156 | HD12 | ILE | 201 | 43.542 | 45.584 | 30.537 | 1.00 | 0.00 | H |
| ATOM | 3157 | HD13 | ILE | 201 | 43.128 | 47.238 | 30.074 | 1.00 | 0.00 | H |
| ATOM | 3158 | C    | ILE | 201 | 47.343 | 50.135 | 31.516 | 1.00 | 0.00 | C |
| ATOM | 3159 | O    | ILE | 201 | 46.921 | 50.853 | 32.431 | 1.00 | 0.00 | O |
| ATOM | 3160 | N    | LYS | 202 | 48.108 | 50.639 | 30.538 | 1.00 | 0.00 | N |
| ATOM | 3161 | H    | LYS | 202 | 48.361 | 50.025 | 29.767 | 1.00 | 0.00 | H |
| ATOM | 3162 | CA   | LYS | 202 | 48.525 | 52.057 | 30.495 | 1.00 | 0.00 | C |
| ATOM | 3163 | HA   | LYS | 202 | 49.081 | 52.280 | 31.406 | 1.00 | 0.00 | H |
| ATOM | 3164 | CB   | LYS | 202 | 49.429 | 52.310 | 29.274 | 1.00 | 0.00 | C |
| ATOM | 3165 | HB2  | LYS | 202 | 50.293 | 51.647 | 29.329 | 1.00 | 0.00 | H |
| ATOM | 3166 | HB3  | LYS | 202 | 48.865 | 52.071 | 28.373 | 1.00 | 0.00 | H |
| ATOM | 3167 | CG   | LYS | 202 | 49.919 | 53.772 | 29.191 | 1.00 | 0.00 | C |
| ATOM | 3168 | HG2  | LYS | 202 | 49.084 | 54.471 | 29.239 | 1.00 | 0.00 | H |
| ATOM | 3169 | HG3  | LYS | 202 | 50.573 | 53.964 | 30.043 | 1.00 | 0.00 | H |



|      |      |      |     |     |        |        |        |      |      |   |
|------|------|------|-----|-----|--------|--------|--------|------|------|---|
| ATOM | 3170 | CD   | LYS | 202 | 50.698 | 54.053 | 27.901 | 1.00 | 0.00 | C |
| ATOM | 3171 | HD2  | LYS | 202 | 51.257 | 54.984 | 28.020 | 1.00 | 0.00 | H |
| ATOM | 3172 | HD3  | LYS | 202 | 51.406 | 53.239 | 27.763 | 1.00 | 0.00 | H |
| ATOM | 3173 | CE   | LYS | 202 | 49.804 | 54.171 | 26.656 | 1.00 | 0.00 | C |
| ATOM | 3174 | HE2  | LYS | 202 | 49.194 | 53.269 | 26.577 | 1.00 | 0.00 | H |
| ATOM | 3175 | HE3  | LYS | 202 | 49.130 | 55.026 | 26.766 | 1.00 | 0.00 | H |
| ATOM | 3176 | NZ   | LYS | 202 | 50.615 | 54.319 | 25.422 | 1.00 | 0.00 | N |
| ATOM | 3177 | HZ1  | LYS | 202 | 50.275 | 53.695 | 24.690 | 1.00 | 0.00 | H |
| ATOM | 3178 | HZ2  | LYS | 202 | 51.582 | 54.045 | 25.589 | 1.00 | 0.00 | H |
| ATOM | 3179 | HZ3  | LYS | 202 | 50.642 | 55.280 | 25.085 | 1.00 | 0.00 | H |
| ATOM | 3180 | C    | LYS | 202 | 47.315 | 52.999 | 30.441 | 1.00 | 0.00 | C |
| ATOM | 3181 | O    | LYS | 202 | 46.571 | 52.975 | 29.462 | 1.00 | 0.00 | O |
| ATOM | 3182 | N    | GLY | 203 | 47.156 | 53.867 | 31.445 | 1.00 | 0.00 | N |
| ATOM | 3183 | H    | GLY | 203 | 47.740 | 53.786 | 32.280 | 1.00 | 0.00 | H |
| ATOM | 3184 | CA   | GLY | 203 | 46.171 | 54.954 | 31.424 | 1.00 | 0.00 | C |
| ATOM | 3185 | HA2  | GLY | 203 | 46.193 | 55.459 | 32.390 | 1.00 | 0.00 | H |
| ATOM | 3186 | HA3  | GLY | 203 | 46.440 | 55.670 | 30.646 | 1.00 | 0.00 | H |
| ATOM | 3187 | C    | GLY | 203 | 44.735 | 54.486 | 31.182 | 1.00 | 0.00 | C |
| ATOM | 3188 | O    | GLY | 203 | 44.020 | 55.108 | 30.393 | 1.00 | 0.00 | O |
| ATOM | 3189 | N    | PHE | 204 | 44.322 | 53.390 | 31.829 | 1.00 | 0.00 | N |
| ATOM | 3190 | H    | PHE | 204 | 44.926 | 53.047 | 32.571 | 1.00 | 0.00 | H |
| ATOM | 3191 | CA   | PHE | 204 | 43.007 | 52.750 | 31.701 | 1.00 | 0.00 | C |
| ATOM | 3192 | HA   | PHE | 204 | 42.903 | 52.374 | 30.685 | 1.00 | 0.00 | H |
| ATOM | 3193 | CB   | PHE | 204 | 42.940 | 51.559 | 32.672 | 1.00 | 0.00 | C |
| ATOM | 3194 | HB2  | PHE | 204 | 43.783 | 50.897 | 32.472 | 1.00 | 0.00 | H |
| ATOM | 3195 | HB3  | PHE | 204 | 43.057 | 51.924 | 33.694 | 1.00 | 0.00 | H |
| ATOM | 3196 | CG   | PHE | 204 | 41.657 | 50.749 | 32.601 | 1.00 | 0.00 | C |
| ATOM | 3197 | CD1  | PHE | 204 | 41.567 | 49.636 | 31.744 | 1.00 | 0.00 | C |
| ATOM | 3198 | HD1  | PHE | 204 | 42.414 | 49.354 | 31.139 | 1.00 | 0.00 | H |
| ATOM | 3199 | CE1  | PHE | 204 | 40.381 | 48.882 | 31.681 | 1.00 | 0.00 | C |
| ATOM | 3200 | HE1  | PHE | 204 | 40.320 | 48.028 | 31.023 | 1.00 | 0.00 | H |
| ATOM | 3201 | CZ   | PHE | 204 | 39.279 | 49.238 | 32.478 | 1.00 | 0.00 | C |
| ATOM | 3202 | HZ   | PHE | 204 | 38.369 | 48.658 | 32.432 | 1.00 | 0.00 | H |
| ATOM | 3203 | CE2  | PHE | 204 | 39.363 | 50.350 | 33.334 | 1.00 | 0.00 | C |
| ATOM | 3204 | HE2  | PHE | 204 | 38.518 | 50.629 | 33.944 | 1.00 | 0.00 | H |
| ATOM | 3205 | CD2  | PHE | 204 | 40.552 | 51.099 | 33.401 | 1.00 | 0.00 | C |
| ATOM | 3206 | HD2  | PHE | 204 | 40.617 | 51.947 | 34.069 | 1.00 | 0.00 | H |
| ATOM | 3207 | C    | PHE | 204 | 41.849 | 53.728 | 31.953 | 1.00 | 0.00 | C |
| ATOM | 3208 | O    | PHE | 204 | 40.799 | 53.616 | 31.316 | 1.00 | 0.00 | O |
| ATOM | 3209 | N    | THR | 205 | 42.075 | 54.758 | 32.779 | 1.00 | 0.00 | N |
| ATOM | 3210 | H    | THR | 205 | 42.939 | 54.759 | 33.317 | 1.00 | 0.00 | H |
| ATOM | 3211 | CA   | THR | 205 | 41.207 | 55.942 | 32.903 | 1.00 | 0.00 | C |
| ATOM | 3212 | HA   | THR | 205 | 40.347 | 55.695 | 33.524 | 1.00 | 0.00 | H |
| ATOM | 3213 | CB   | THR | 205 | 41.991 | 57.063 | 33.603 | 1.00 | 0.00 | C |
| ATOM | 3214 | HB   | THR | 205 | 42.975 | 57.158 | 33.142 | 1.00 | 0.00 | H |
| ATOM | 3215 | CG2  | THR | 205 | 41.311 | 58.427 | 33.546 | 1.00 | 0.00 | C |
| ATOM | 3216 | HG21 | THR | 205 | 41.759 | 59.087 | 34.289 | 1.00 | 0.00 | H |
| ATOM | 3217 | HG22 | THR | 205 | 40.246 | 58.315 | 33.741 | 1.00 | 0.00 | H |
| ATOM | 3218 | HG23 | THR | 205 | 41.457 | 58.863 | 32.558 | 1.00 | 0.00 | H |
| ATOM | 3219 | OG1  | THR | 205 | 42.158 | 56.722 | 34.953 | 1.00 | 0.00 | O |
| ATOM | 3220 | HG1  | THR | 205 | 42.985 | 56.169 | 34.990 | 1.00 | 0.00 | H |
| ATOM | 3221 | C    | THR | 205 | 40.694 | 56.445 | 31.548 | 1.00 | 0.00 | C |

|      |      |      |     |     |        |        |        |      |      |   |
|------|------|------|-----|-----|--------|--------|--------|------|------|---|
| ATOM | 3222 | O    | THR | 205 | 39.487 | 56.615 | 31.365 | 1.00 | 0.00 | O |
| ATOM | 3223 | N    | SER | 206 | 41.598 | 56.597 | 30.575 | 1.00 | 0.00 | N |
| ATOM | 3224 | H    | SER | 206 | 42.556 | 56.346 | 30.784 | 1.00 | 0.00 | H |
| ATOM | 3225 | CA   | SER | 206 | 41.328 | 57.119 | 29.228 | 1.00 | 0.00 | C |
| ATOM | 3226 | HA   | SER | 206 | 40.913 | 58.123 | 29.315 | 1.00 | 0.00 | H |
| ATOM | 3227 | CB   | SER | 206 | 42.622 | 57.189 | 28.400 | 1.00 | 0.00 | C |
| ATOM | 3228 | HB2  | SER | 206 | 42.871 | 56.197 | 28.017 | 1.00 | 0.00 | H |
| ATOM | 3229 | HB3  | SER | 206 | 42.464 | 57.855 | 27.551 | 1.00 | 0.00 | H |
| ATOM | 3230 | OG   | SER | 206 | 43.714 | 57.653 | 29.166 | 1.00 | 0.00 | O |
| ATOM | 3231 | HG   | SER | 206 | 44.112 | 56.874 | 29.585 | 1.00 | 0.00 | H |
| ATOM | 3232 | C    | SER | 206 | 40.340 | 56.251 | 28.450 | 1.00 | 0.00 | C |
| ATOM | 3233 | O    | SER | 206 | 39.516 | 56.775 | 27.707 | 1.00 | 0.00 | O |
| ATOM | 3234 | N    | LEU | 207 | 40.415 | 54.930 | 28.638 | 1.00 | 0.00 | N |
| ATOM | 3235 | H    | LEU | 207 | 41.080 | 54.593 | 29.323 | 1.00 | 0.00 | H |
| ATOM | 3236 | CA   | LEU | 207 | 39.499 | 53.952 | 28.051 | 1.00 | 0.00 | C |
| ATOM | 3237 | HA   | LEU | 207 | 39.360 | 54.178 | 26.992 | 1.00 | 0.00 | H |
| ATOM | 3238 | CB   | LEU | 207 | 40.100 | 52.535 | 28.196 | 1.00 | 0.00 | C |
| ATOM | 3239 | HB2  | LEU | 207 | 40.016 | 52.232 | 29.240 | 1.00 | 0.00 | H |
| ATOM | 3240 | HB3  | LEU | 207 | 39.494 | 51.843 | 27.610 | 1.00 | 0.00 | H |
| ATOM | 3241 | CG   | LEU | 207 | 41.578 | 52.375 | 27.783 | 1.00 | 0.00 | C |
| ATOM | 3242 | HG   | LEU | 207 | 42.197 | 53.082 | 28.335 | 1.00 | 0.00 | H |
| ATOM | 3243 | CD1  | LEU | 207 | 42.062 | 50.970 | 28.132 | 1.00 | 0.00 | C |
| ATOM | 3244 | HD11 | LEU | 207 | 41.960 | 50.804 | 29.203 | 1.00 | 0.00 | H |
| ATOM | 3245 | HD12 | LEU | 207 | 43.111 | 50.863 | 27.856 | 1.00 | 0.00 | H |
| ATOM | 3246 | HD13 | LEU | 207 | 41.468 | 50.230 | 27.601 | 1.00 | 0.00 | H |
| ATOM | 3247 | CD2  | LEU | 207 | 41.789 | 52.594 | 26.287 | 1.00 | 0.00 | C |
| ATOM | 3248 | HD21 | LEU | 207 | 41.238 | 51.845 | 25.721 | 1.00 | 0.00 | H |
| ATOM | 3249 | HD22 | LEU | 207 | 41.456 | 53.591 | 26.002 | 1.00 | 0.00 | H |
| ATOM | 3250 | HD23 | LEU | 207 | 42.850 | 52.504 | 26.051 | 1.00 | 0.00 | H |
| ATOM | 3251 | C    | LEU | 207 | 38.126 | 54.038 | 28.736 | 1.00 | 0.00 | C |
| ATOM | 3252 | O    | LEU | 207 | 37.094 | 54.036 | 28.066 | 1.00 | 0.00 | O |
| ATOM | 3253 | N    | SER | 208 | 38.130 | 54.155 | 30.071 | 1.00 | 0.00 | N |
| ATOM | 3254 | H    | SER | 208 | 39.031 | 54.143 | 30.537 | 1.00 | 0.00 | H |
| ATOM | 3255 | CA   | SER | 208 | 36.922 | 54.159 | 30.905 | 1.00 | 0.00 | C |
| ATOM | 3256 | HA   | SER | 208 | 36.310 | 53.323 | 30.580 | 1.00 | 0.00 | H |
| ATOM | 3257 | CB   | SER | 208 | 37.293 | 53.907 | 32.373 | 1.00 | 0.00 | C |
| ATOM | 3258 | HB2  | SER | 208 | 36.393 | 53.606 | 32.910 | 1.00 | 0.00 | H |
| ATOM | 3259 | HB3  | SER | 208 | 38.009 | 53.085 | 32.423 | 1.00 | 0.00 | H |
| ATOM | 3260 | OG   | SER | 208 | 37.839 | 55.040 | 33.025 | 1.00 | 0.00 | O |
| ATOM | 3261 | HG   | SER | 208 | 38.373 | 55.552 | 32.392 | 1.00 | 0.00 | H |
| ATOM | 3262 | C    | SER | 208 | 36.037 | 55.401 | 30.751 | 1.00 | 0.00 | C |
| ATOM | 3263 | O    | SER | 208 | 34.828 | 55.289 | 30.921 | 1.00 | 0.00 | O |
| ATOM | 3264 | N    | ASP | 209 | 36.593 | 56.561 | 30.378 | 1.00 | 0.00 | N |
| ATOM | 3265 | H    | ASP | 209 | 37.603 | 56.627 | 30.350 | 1.00 | 0.00 | H |
| ATOM | 3266 | CA   | ASP | 209 | 35.783 | 57.752 | 30.075 | 1.00 | 0.00 | C |
| ATOM | 3267 | HA   | ASP | 209 | 35.109 | 57.964 | 30.907 | 1.00 | 0.00 | H |
| ATOM | 3268 | CB   | ASP | 209 | 36.674 | 58.975 | 29.814 | 1.00 | 0.00 | C |
| ATOM | 3269 | HB2  | ASP | 209 | 37.352 | 58.719 | 29.001 | 1.00 | 0.00 | H |
| ATOM | 3270 | HB3  | ASP | 209 | 36.031 | 59.786 | 29.470 | 1.00 | 0.00 | H |
| ATOM | 3271 | CG   | ASP | 209 | 37.517 | 59.559 | 30.933 | 1.00 | 0.00 | C |
| ATOM | 3272 | OD1  | ASP | 209 | 37.203 | 59.419 | 32.136 | 1.00 | 0.00 | O |
| ATOM | 3273 | OD2  | ASP | 209 | 38.456 | 60.286 | 30.535 | 1.00 | 0.00 | O |

|      |      |     |     |     |        |        |        |      |      |   |
|------|------|-----|-----|-----|--------|--------|--------|------|------|---|
| ATOM | 3274 | C   | ASP | 209 | 34.947 | 57.609 | 28.789 | 1.00 | 0.00 | C |
| ATOM | 3275 | O   | ASP | 209 | 33.816 | 58.095 | 28.717 | 1.00 | 0.00 | O |
| ATOM | 3276 | N   | LYS | 210 | 35.563 | 57.084 | 27.717 | 1.00 | 0.00 | N |
| ATOM | 3277 | H   | LYS | 210 | 36.463 | 56.643 | 27.865 | 1.00 | 0.00 | H |
| ATOM | 3278 | CA  | LYS | 210 | 35.142 | 57.391 | 26.335 | 1.00 | 0.00 | C |
| ATOM | 3279 | HA  | LYS | 210 | 34.490 | 58.265 | 26.353 | 1.00 | 0.00 | H |
| ATOM | 3280 | CB  | LYS | 210 | 36.369 | 57.731 | 25.459 | 1.00 | 0.00 | C |
| ATOM | 3281 | HB2 | LYS | 210 | 36.937 | 56.815 | 25.291 | 1.00 | 0.00 | H |
| ATOM | 3282 | HB3 | LYS | 210 | 36.007 | 58.067 | 24.485 | 1.00 | 0.00 | H |
| ATOM | 3283 | CG  | LYS | 210 | 37.356 | 58.792 | 25.990 | 1.00 | 0.00 | C |
| ATOM | 3284 | HG2 | LYS | 210 | 37.866 | 58.382 | 26.855 | 1.00 | 0.00 | H |
| ATOM | 3285 | HG3 | LYS | 210 | 38.106 | 58.965 | 25.218 | 1.00 | 0.00 | H |
| ATOM | 3286 | CD  | LYS | 210 | 36.738 | 60.143 | 26.385 | 1.00 | 0.00 | C |
| ATOM | 3287 | HD2 | LYS | 210 | 36.151 | 60.514 | 25.543 | 1.00 | 0.00 | H |
| ATOM | 3288 | HD3 | LYS | 210 | 36.058 | 60.010 | 27.224 | 1.00 | 0.00 | H |
| ATOM | 3289 | CE  | LYS | 210 | 37.797 | 61.210 | 26.734 | 1.00 | 0.00 | C |
| ATOM | 3290 | HE2 | LYS | 210 | 38.371 | 61.425 | 25.828 | 1.00 | 0.00 | H |
| ATOM | 3291 | HE3 | LYS | 210 | 37.282 | 62.133 | 27.014 | 1.00 | 0.00 | H |
| ATOM | 3292 | NZ  | LYS | 210 | 38.745 | 60.828 | 27.817 | 1.00 | 0.00 | N |
| ATOM | 3293 | HZ1 | LYS | 210 | 39.237 | 59.976 | 27.596 | 1.00 | 0.00 | H |
| ATOM | 3294 | HZ2 | LYS | 210 | 38.316 | 60.710 | 28.737 | 1.00 | 0.00 | H |
| ATOM | 3295 | HZ3 | LYS | 210 | 39.436 | 61.570 | 27.929 | 1.00 | 0.00 | H |
| ATOM | 3296 | C   | LYS | 210 | 34.313 | 56.290 | 25.665 | 1.00 | 0.00 | C |
| ATOM | 3297 | O   | LYS | 210 | 33.622 | 56.581 | 24.686 | 1.00 | 0.00 | O |
| ATOM | 3298 | N   | MET | 211 | 34.408 | 55.048 | 26.144 | 1.00 | 0.00 | N |
| ATOM | 3299 | H   | MET | 211 | 34.922 | 54.910 | 27.003 | 1.00 | 0.00 | H |
| ATOM | 3300 | CA  | MET | 211 | 34.038 | 53.852 | 25.373 | 1.00 | 0.00 | C |
| ATOM | 3301 | HA  | MET | 211 | 33.734 | 54.181 | 24.382 | 1.00 | 0.00 | H |
| ATOM | 3302 | CB  | MET | 211 | 35.274 | 52.958 | 25.190 | 1.00 | 0.00 | C |
| ATOM | 3303 | HB2 | MET | 211 | 35.564 | 52.545 | 26.158 | 1.00 | 0.00 | H |
| ATOM | 3304 | HB3 | MET | 211 | 35.021 | 52.126 | 24.533 | 1.00 | 0.00 | H |
| ATOM | 3305 | CG  | MET | 211 | 36.477 | 53.714 | 24.604 | 1.00 | 0.00 | C |
| ATOM | 3306 | HG2 | MET | 211 | 36.821 | 54.443 | 25.338 | 1.00 | 0.00 | H |
| ATOM | 3307 | HG3 | MET | 211 | 37.292 | 53.011 | 24.469 | 1.00 | 0.00 | H |
| ATOM | 3308 | SD  | MET | 211 | 36.209 | 54.586 | 23.031 | 1.00 | 0.00 | S |
| ATOM | 3309 | CE  | MET | 211 | 35.730 | 53.230 | 21.926 | 1.00 | 0.00 | C |
| ATOM | 3310 | HE1 | MET | 211 | 36.504 | 52.464 | 21.923 | 1.00 | 0.00 | H |
| ATOM | 3311 | HE2 | MET | 211 | 34.785 | 52.799 | 22.255 | 1.00 | 0.00 | H |
| ATOM | 3312 | HE3 | MET | 211 | 35.608 | 53.620 | 20.915 | 1.00 | 0.00 | H |
| ATOM | 3313 | C   | MET | 211 | 32.872 | 53.058 | 25.992 | 1.00 | 0.00 | C |
| ATOM | 3314 | O   | MET | 211 | 32.740 | 53.029 | 27.216 | 1.00 | 0.00 | O |
| ATOM | 3315 | N   | PRO | 212 | 32.038 | 52.361 | 25.187 | 1.00 | 0.00 | N |
| ATOM | 3316 | CD  | PRO | 212 | 31.984 | 52.395 | 23.729 | 1.00 | 0.00 | C |
| ATOM | 3317 | HD2 | PRO | 212 | 32.714 | 51.695 | 23.319 | 1.00 | 0.00 | H |
| ATOM | 3318 | HD3 | PRO | 212 | 32.154 | 53.396 | 23.331 | 1.00 | 0.00 | H |
| ATOM | 3319 | CG  | PRO | 212 | 30.571 | 51.949 | 23.361 | 1.00 | 0.00 | C |
| ATOM | 3320 | HG2 | PRO | 212 | 30.533 | 51.470 | 22.384 | 1.00 | 0.00 | H |
| ATOM | 3321 | HG3 | PRO | 212 | 29.895 | 52.804 | 23.394 | 1.00 | 0.00 | H |
| ATOM | 3322 | CB  | PRO | 212 | 30.220 | 50.972 | 24.478 | 1.00 | 0.00 | C |
| ATOM | 3323 | HB2 | PRO | 212 | 30.644 | 49.994 | 24.243 | 1.00 | 0.00 | H |
| ATOM | 3324 | HB3 | PRO | 212 | 29.142 | 50.897 | 24.622 | 1.00 | 0.00 | H |
| ATOM | 3325 | CA  | PRO | 212 | 30.916 | 51.576 | 25.703 | 1.00 | 0.00 | C |

|      |      |      |     |     |        |        |        |      |      |   |
|------|------|------|-----|-----|--------|--------|--------|------|------|---|
| ATOM | 3326 | HA   | PRO | 212 | 30.228 | 52.264 | 26.195 | 1.00 | 0.00 | H |
| ATOM | 3327 | C    | PRO | 212 | 31.330 | 50.481 | 26.696 | 1.00 | 0.00 | C |
| ATOM | 3328 | O    | PRO | 212 | 32.341 | 49.806 | 26.516 | 1.00 | 0.00 | O |
| ATOM | 3329 | N    | LEU | 213 | 30.479 | 50.229 | 27.694 | 1.00 | 0.00 | N |
| ATOM | 3330 | H    | LEU | 213 | 29.680 | 50.840 | 27.757 | 1.00 | 0.00 | H |
| ATOM | 3331 | CA   | LEU | 213 | 30.732 | 49.342 | 28.843 | 1.00 | 0.00 | C |
| ATOM | 3332 | HA   | LEU | 213 | 31.504 | 49.793 | 29.471 | 1.00 | 0.00 | H |
| ATOM | 3333 | CB   | LEU | 213 | 29.429 | 49.205 | 29.659 | 1.00 | 0.00 | C |
| ATOM | 3334 | HB2  | LEU | 213 | 28.729 | 48.604 | 29.076 | 1.00 | 0.00 | H |
| ATOM | 3335 | HB3  | LEU | 213 | 29.643 | 48.654 | 30.577 | 1.00 | 0.00 | H |
| ATOM | 3336 | CG   | LEU | 213 | 28.722 | 50.523 | 30.020 | 1.00 | 0.00 | C |
| ATOM | 3337 | HG   | LEU | 213 | 28.641 | 51.163 | 29.143 | 1.00 | 0.00 | H |
| ATOM | 3338 | CD1  | LEU | 213 | 27.298 | 50.198 | 30.460 | 1.00 | 0.00 | C |
| ATOM | 3339 | HD11 | LEU | 213 | 26.761 | 49.701 | 29.651 | 1.00 | 0.00 | H |
| ATOM | 3340 | HD12 | LEU | 213 | 26.768 | 51.112 | 30.714 | 1.00 | 0.00 | H |
| ATOM | 3341 | HD13 | LEU | 213 | 27.329 | 49.528 | 31.315 | 1.00 | 0.00 | H |
| ATOM | 3342 | CD2  | LEU | 213 | 29.485 | 51.280 | 31.105 | 1.00 | 0.00 | C |
| ATOM | 3343 | HD21 | LEU | 213 | 29.395 | 50.768 | 32.063 | 1.00 | 0.00 | H |
| ATOM | 3344 | HD22 | LEU | 213 | 30.538 | 51.368 | 30.837 | 1.00 | 0.00 | H |
| ATOM | 3345 | HD23 | LEU | 213 | 29.093 | 52.291 | 31.191 | 1.00 | 0.00 | H |
| ATOM | 3346 | C    | LEU | 213 | 31.226 | 47.942 | 28.444 | 1.00 | 0.00 | C |
| ATOM | 3347 | O    | LEU | 213 | 32.281 | 47.485 | 28.880 | 1.00 | 0.00 | O |
| ATOM | 3348 | N    | THR | 214 | 30.490 | 47.268 | 27.554 | 1.00 | 0.00 | N |
| ATOM | 3349 | H    | THR | 214 | 29.643 | 47.697 | 27.217 | 1.00 | 0.00 | H |
| ATOM | 3350 | CA   | THR | 214 | 30.882 | 45.941 | 27.051 | 1.00 | 0.00 | C |
| ATOM | 3351 | HA   | THR | 214 | 31.128 | 45.306 | 27.904 | 1.00 | 0.00 | H |
| ATOM | 3352 | CB   | THR | 214 | 29.711 | 45.269 | 26.310 | 1.00 | 0.00 | C |
| ATOM | 3353 | HB   | THR | 214 | 29.274 | 45.973 | 25.601 | 1.00 | 0.00 | H |
| ATOM | 3354 | CG2  | THR | 214 | 30.074 | 43.984 | 25.561 | 1.00 | 0.00 | C |
| ATOM | 3355 | HG21 | THR | 214 | 29.165 | 43.506 | 25.196 | 1.00 | 0.00 | H |
| ATOM | 3356 | HG22 | THR | 214 | 30.595 | 43.298 | 26.230 | 1.00 | 0.00 | H |
| ATOM | 3357 | HG23 | THR | 214 | 30.709 | 44.212 | 24.707 | 1.00 | 0.00 | H |
| ATOM | 3358 | OG1  | THR | 214 | 28.736 | 44.888 | 27.253 | 1.00 | 0.00 | O |
| ATOM | 3359 | HG1  | THR | 214 | 28.296 | 45.666 | 27.604 | 1.00 | 0.00 | H |
| ATOM | 3360 | C    | THR | 214 | 32.147 | 46.008 | 26.189 | 1.00 | 0.00 | C |
| ATOM | 3361 | O    | THR | 214 | 32.897 | 45.041 | 26.140 | 1.00 | 0.00 | O |
| ATOM | 3362 | N    | HID | 215 | 32.447 | 47.135 | 25.536 | 1.00 | 0.00 | N |
| ATOM | 3363 | H    | HID | 215 | 31.893 | 47.964 | 25.707 | 1.00 | 0.00 | H |
| ATOM | 3364 | CA   | HID | 215 | 33.696 | 47.307 | 24.783 | 1.00 | 0.00 | C |
| ATOM | 3365 | HA   | HID | 215 | 33.917 | 46.371 | 24.275 | 1.00 | 0.00 | H |
| ATOM | 3366 | CB   | HID | 215 | 33.509 | 48.366 | 23.678 | 1.00 | 0.00 | C |
| ATOM | 3367 | HB2  | HID | 215 | 33.169 | 49.304 | 24.116 | 1.00 | 0.00 | H |
| ATOM | 3368 | HB3  | HID | 215 | 34.478 | 48.549 | 23.212 | 1.00 | 0.00 | H |
| ATOM | 3369 | CG   | HID | 215 | 32.543 | 47.943 | 22.585 | 1.00 | 0.00 | C |
| ATOM | 3370 | ND1  | HID | 215 | 32.207 | 48.652 | 21.447 | 1.00 | 0.00 | N |
| ATOM | 3371 | HD1  | HID | 215 | 32.487 | 49.599 | 21.199 | 1.00 | 0.00 | H |
| ATOM | 3372 | CE1  | HID | 215 | 31.414 | 47.874 | 20.687 | 1.00 | 0.00 | C |
| ATOM | 3373 | HE1  | HID | 215 | 30.998 | 48.164 | 19.729 | 1.00 | 0.00 | H |
| ATOM | 3374 | NE2  | HID | 215 | 31.212 | 46.681 | 21.277 | 1.00 | 0.00 | N |
| ATOM | 3375 | CD2  | HID | 215 | 31.902 | 46.733 | 22.488 | 1.00 | 0.00 | C |
| ATOM | 3376 | HD2  | HID | 215 | 31.950 | 45.930 | 23.206 | 1.00 | 0.00 | H |
| ATOM | 3377 | C    | HID | 215 | 34.908 | 47.551 | 25.701 | 1.00 | 0.00 | C |

|      |      |      |     |     |        |        |        |      |      |   |
|------|------|------|-----|-----|--------|--------|--------|------|------|---|
| ATOM | 3378 | O    | HID | 215 | 36.010 | 47.115 | 25.369 | 1.00 | 0.00 | O |
| ATOM | 3379 | N    | LEU | 216 | 34.704 | 48.129 | 26.891 | 1.00 | 0.00 | N |
| ATOM | 3380 | H    | LEU | 216 | 33.792 | 48.527 | 27.087 | 1.00 | 0.00 | H |
| ATOM | 3381 | CA   | LEU | 216 | 35.719 | 48.173 | 27.947 | 1.00 | 0.00 | C |
| ATOM | 3382 | HA   | LEU | 216 | 36.647 | 48.513 | 27.488 | 1.00 | 0.00 | H |
| ATOM | 3383 | CB   | LEU | 216 | 35.288 | 49.206 | 29.004 | 1.00 | 0.00 | C |
| ATOM | 3384 | HB2  | LEU | 216 | 34.983 | 50.122 | 28.495 | 1.00 | 0.00 | H |
| ATOM | 3385 | HB3  | LEU | 216 | 34.420 | 48.819 | 29.540 | 1.00 | 0.00 | H |
| ATOM | 3386 | CG   | LEU | 216 | 36.377 | 49.562 | 30.034 | 1.00 | 0.00 | C |
| ATOM | 3387 | HG   | LEU | 216 | 36.704 | 48.662 | 30.554 | 1.00 | 0.00 | H |
| ATOM | 3388 | CD1  | LEU | 216 | 37.588 | 50.238 | 29.384 | 1.00 | 0.00 | C |
| ATOM | 3389 | HD11 | LEU | 216 | 38.121 | 49.528 | 28.752 | 1.00 | 0.00 | H |
| ATOM | 3390 | HD12 | LEU | 216 | 38.277 | 50.584 | 30.154 | 1.00 | 0.00 | H |
| ATOM | 3391 | HD13 | LEU | 216 | 37.262 | 51.090 | 28.788 | 1.00 | 0.00 | H |
| ATOM | 3392 | CD2  | LEU | 216 | 35.797 | 50.536 | 31.058 | 1.00 | 0.00 | C |
| ATOM | 3393 | HD21 | LEU | 216 | 35.386 | 51.405 | 30.547 | 1.00 | 0.00 | H |
| ATOM | 3394 | HD22 | LEU | 216 | 34.991 | 50.058 | 31.609 | 1.00 | 0.00 | H |
| ATOM | 3395 | HD23 | LEU | 216 | 36.568 | 50.846 | 31.763 | 1.00 | 0.00 | H |
| ATOM | 3396 | C    | LEU | 216 | 35.992 | 46.775 | 28.538 | 1.00 | 0.00 | C |
| ATOM | 3397 | O    | LEU | 216 | 37.154 | 46.406 | 28.705 | 1.00 | 0.00 | O |
| ATOM | 3398 | N    | LEU | 217 | 34.961 | 45.946 | 28.762 | 1.00 | 0.00 | N |
| ATOM | 3399 | H    | LEU | 217 | 34.020 | 46.315 | 28.679 | 1.00 | 0.00 | H |
| ATOM | 3400 | CA   | LEU | 217 | 35.151 | 44.533 | 29.138 | 1.00 | 0.00 | C |
| ATOM | 3401 | HA   | LEU | 217 | 35.873 | 44.498 | 29.951 | 1.00 | 0.00 | H |
| ATOM | 3402 | CB   | LEU | 217 | 33.840 | 43.897 | 29.629 | 1.00 | 0.00 | C |
| ATOM | 3403 | HB2  | LEU | 217 | 33.039 | 44.152 | 28.935 | 1.00 | 0.00 | H |
| ATOM | 3404 | HB3  | LEU | 217 | 33.955 | 42.811 | 29.615 | 1.00 | 0.00 | H |
| ATOM | 3405 | CG   | LEU | 217 | 33.435 | 44.304 | 31.056 | 1.00 | 0.00 | C |
| ATOM | 3406 | HG   | LEU | 217 | 33.312 | 45.384 | 31.098 | 1.00 | 0.00 | H |
| ATOM | 3407 | CD1  | LEU | 217 | 32.103 | 43.646 | 31.394 | 1.00 | 0.00 | C |
| ATOM | 3408 | HD11 | LEU | 217 | 31.339 | 43.979 | 30.694 | 1.00 | 0.00 | H |
| ATOM | 3409 | HD12 | LEU | 217 | 31.820 | 43.920 | 32.409 | 1.00 | 0.00 | H |
| ATOM | 3410 | HD13 | LEU | 217 | 32.198 | 42.559 | 31.339 | 1.00 | 0.00 | H |
| ATOM | 3411 | CD2  | LEU | 217 | 34.440 | 43.863 | 32.128 | 1.00 | 0.00 | C |
| ATOM | 3412 | HD21 | LEU | 217 | 34.592 | 42.784 | 32.069 | 1.00 | 0.00 | H |
| ATOM | 3413 | HD22 | LEU | 217 | 35.389 | 44.376 | 32.006 | 1.00 | 0.00 | H |
| ATOM | 3414 | HD23 | LEU | 217 | 34.048 | 44.104 | 33.117 | 1.00 | 0.00 | H |
| ATOM | 3415 | C    | LEU | 217 | 35.774 | 43.677 | 28.024 | 1.00 | 0.00 | C |
| ATOM | 3416 | O    | LEU | 217 | 36.689 | 42.910 | 28.313 | 1.00 | 0.00 | O |
| ATOM | 3417 | N    | LYS | 218 | 35.399 | 43.859 | 26.746 | 1.00 | 0.00 | N |
| ATOM | 3418 | H    | LYS | 218 | 34.592 | 44.448 | 26.570 | 1.00 | 0.00 | H |
| ATOM | 3419 | CA   | LYS | 218 | 36.073 | 43.205 | 25.598 | 1.00 | 0.00 | C |
| ATOM | 3420 | HA   | LYS | 218 | 35.960 | 42.123 | 25.695 | 1.00 | 0.00 | H |
| ATOM | 3421 | CB   | LYS | 218 | 35.477 | 43.662 | 24.250 | 1.00 | 0.00 | C |
| ATOM | 3422 | HB2  | LYS | 218 | 35.356 | 44.743 | 24.275 | 1.00 | 0.00 | H |
| ATOM | 3423 | HB3  | LYS | 218 | 36.205 | 43.445 | 23.465 | 1.00 | 0.00 | H |
| ATOM | 3424 | CG   | LYS | 218 | 34.159 | 43.000 | 23.810 | 1.00 | 0.00 | C |
| ATOM | 3425 | HG2  | LYS | 218 | 34.301 | 41.922 | 23.721 | 1.00 | 0.00 | H |
| ATOM | 3426 | HG3  | LYS | 218 | 33.376 | 43.190 | 24.541 | 1.00 | 0.00 | H |
| ATOM | 3427 | CD   | LYS | 218 | 33.753 | 43.581 | 22.442 | 1.00 | 0.00 | C |
| ATOM | 3428 | HD2  | LYS | 218 | 33.739 | 44.667 | 22.513 | 1.00 | 0.00 | H |
| ATOM | 3429 | HD3  | LYS | 218 | 34.510 | 43.305 | 21.704 | 1.00 | 0.00 | H |

|      |      |      |     |     |        |        |        |      |      |   |
|------|------|------|-----|-----|--------|--------|--------|------|------|---|
| ATOM | 3430 | CE   | LYS | 218 | 32.386 | 43.093 | 21.944 | 1.00 | 0.00 | C |
| ATOM | 3431 | HE2  | LYS | 218 | 32.457 | 42.022 | 21.728 | 1.00 | 0.00 | H |
| ATOM | 3432 | HE3  | LYS | 218 | 31.639 | 43.228 | 22.732 | 1.00 | 0.00 | H |
| ATOM | 3433 | NZ   | LYS | 218 | 31.975 | 43.830 | 20.720 | 1.00 | 0.00 | N |
| ATOM | 3434 | HZ1  | LYS | 218 | 31.189 | 43.389 | 20.244 | 1.00 | 0.00 | H |
| ATOM | 3435 | HZ2  | LYS | 218 | 32.738 | 43.861 | 20.043 | 1.00 | 0.00 | H |
| ATOM | 3436 | HZ3  | LYS | 218 | 31.719 | 44.796 | 20.910 | 1.00 | 0.00 | H |
| ATOM | 3437 | C    | LYS | 218 | 37.583 | 43.484 | 25.559 | 1.00 | 0.00 | C |
| ATOM | 3438 | O    | LYS | 218 | 38.311 | 42.728 | 24.914 | 1.00 | 0.00 | O |
| ATOM | 3439 | N    | LEU | 219 | 38.055 | 44.562 | 26.184 | 1.00 | 0.00 | N |
| ATOM | 3440 | H    | LEU | 219 | 37.385 | 45.171 | 26.633 | 1.00 | 0.00 | H |
| ATOM | 3441 | CA   | LEU | 219 | 39.475 | 44.866 | 26.362 | 1.00 | 0.00 | C |
| ATOM | 3442 | HA   | LEU | 219 | 40.044 | 44.415 | 25.547 | 1.00 | 0.00 | H |
| ATOM | 3443 | CB   | LEU | 219 | 39.627 | 46.392 | 26.244 | 1.00 | 0.00 | C |
| ATOM | 3444 | HB2  | LEU | 219 | 39.244 | 46.667 | 25.260 | 1.00 | 0.00 | H |
| ATOM | 3445 | HB3  | LEU | 219 | 38.994 | 46.891 | 26.978 | 1.00 | 0.00 | H |
| ATOM | 3446 | CG   | LEU | 219 | 41.066 | 46.925 | 26.377 | 1.00 | 0.00 | C |
| ATOM | 3447 | HG   | LEU | 219 | 41.771 | 46.200 | 25.969 | 1.00 | 0.00 | H |
| ATOM | 3448 | CD1  | LEU | 219 | 41.182 | 48.216 | 25.571 | 1.00 | 0.00 | C |
| ATOM | 3449 | HD11 | LEU | 219 | 41.000 | 48.007 | 24.518 | 1.00 | 0.00 | H |
| ATOM | 3450 | HD12 | LEU | 219 | 42.182 | 48.639 | 25.664 | 1.00 | 0.00 | H |
| ATOM | 3451 | HD13 | LEU | 219 | 40.451 | 48.942 | 25.925 | 1.00 | 0.00 | H |
| ATOM | 3452 | CD2  | LEU | 219 | 41.434 | 47.247 | 27.826 | 1.00 | 0.00 | C |
| ATOM | 3453 | HD21 | LEU | 219 | 40.687 | 47.904 | 28.272 | 1.00 | 0.00 | H |
| ATOM | 3454 | HD22 | LEU | 219 | 41.507 | 46.333 | 28.411 | 1.00 | 0.00 | H |
| ATOM | 3455 | HD23 | LEU | 219 | 42.403 | 47.743 | 27.856 | 1.00 | 0.00 | H |
| ATOM | 3456 | C    | LEU | 219 | 40.028 | 44.262 | 27.665 | 1.00 | 0.00 | C |
| ATOM | 3457 | O    | LEU | 219 | 41.051 | 43.580 | 27.633 | 1.00 | 0.00 | O |
| ATOM | 3458 | N    | LEU | 220 | 39.348 | 44.476 | 28.795 | 1.00 | 0.00 | N |
| ATOM | 3459 | H    | LEU | 220 | 38.511 | 45.048 | 28.749 | 1.00 | 0.00 | H |
| ATOM | 3460 | CA   | LEU | 220 | 39.814 | 44.054 | 30.119 | 1.00 | 0.00 | C |
| ATOM | 3461 | HA   | LEU | 220 | 40.850 | 44.381 | 30.218 | 1.00 | 0.00 | H |
| ATOM | 3462 | CB   | LEU | 220 | 38.971 | 44.779 | 31.183 | 1.00 | 0.00 | C |
| ATOM | 3463 | HB2  | LEU | 220 | 39.008 | 45.852 | 30.993 | 1.00 | 0.00 | H |
| ATOM | 3464 | HB3  | LEU | 220 | 37.934 | 44.455 | 31.085 | 1.00 | 0.00 | H |
| ATOM | 3465 | CG   | LEU | 220 | 39.431 | 44.515 | 32.628 | 1.00 | 0.00 | C |
| ATOM | 3466 | HG   | LEU | 220 | 39.385 | 43.448 | 32.843 | 1.00 | 0.00 | H |
| ATOM | 3467 | CD1  | LEU | 220 | 40.852 | 45.019 | 32.875 | 1.00 | 0.00 | C |
| ATOM | 3468 | HD11 | LEU | 220 | 41.569 | 44.417 | 32.318 | 1.00 | 0.00 | H |
| ATOM | 3469 | HD12 | LEU | 220 | 41.090 | 44.916 | 33.931 | 1.00 | 0.00 | H |
| ATOM | 3470 | HD13 | LEU | 220 | 40.943 | 46.066 | 32.590 | 1.00 | 0.00 | H |
| ATOM | 3471 | CD2  | LEU | 220 | 38.496 | 45.236 | 33.598 | 1.00 | 0.00 | C |
| ATOM | 3472 | HD21 | LEU | 220 | 38.529 | 46.310 | 33.423 | 1.00 | 0.00 | H |
| ATOM | 3473 | HD22 | LEU | 220 | 37.478 | 44.869 | 33.473 | 1.00 | 0.00 | H |
| ATOM | 3474 | HD23 | LEU | 220 | 38.822 | 45.032 | 34.618 | 1.00 | 0.00 | H |
| ATOM | 3475 | C    | LEU | 220 | 39.811 | 42.528 | 30.316 | 1.00 | 0.00 | C |
| ATOM | 3476 | O    | LEU | 220 | 40.824 | 41.971 | 30.731 | 1.00 | 0.00 | O |
| ATOM | 3477 | N    | GLU | 221 | 38.716 | 41.839 | 29.973 | 1.00 | 0.00 | N |
| ATOM | 3478 | H    | GLU | 221 | 37.925 | 42.340 | 29.579 | 1.00 | 0.00 | H |
| ATOM | 3479 | CA   | GLU | 221 | 38.650 | 40.366 | 29.998 | 1.00 | 0.00 | C |
| ATOM | 3480 | HA   | GLU | 221 | 38.892 | 40.005 | 31.000 | 1.00 | 0.00 | H |
| ATOM | 3481 | CB   | GLU | 221 | 37.243 | 39.851 | 29.617 | 1.00 | 0.00 | C |

|      |      |      |     |     |        |        |        |      |      |   |
|------|------|------|-----|-----|--------|--------|--------|------|------|---|
| ATOM | 3482 | HB2  | GLU | 221 | 36.999 | 40.183 | 28.606 | 1.00 | 0.00 | H |
| ATOM | 3483 | HB3  | GLU | 221 | 37.287 | 38.761 | 29.604 | 1.00 | 0.00 | H |
| ATOM | 3484 | CG   | GLU | 221 | 36.104 | 40.270 | 30.564 | 1.00 | 0.00 | C |
| ATOM | 3485 | HG2  | GLU | 221 | 36.405 | 40.059 | 31.593 | 1.00 | 0.00 | H |
| ATOM | 3486 | HG3  | GLU | 221 | 35.937 | 41.345 | 30.480 | 1.00 | 0.00 | H |
| ATOM | 3487 | CD   | GLU | 221 | 34.803 | 39.502 | 30.255 | 1.00 | 0.00 | C |
| ATOM | 3488 | OE1  | GLU | 221 | 33.851 | 40.085 | 29.686 | 1.00 | 0.00 | O |
| ATOM | 3489 | OE2  | GLU | 221 | 34.717 | 38.296 | 30.589 | 1.00 | 0.00 | O |
| ATOM | 3490 | C    | GLU | 221 | 39.682 | 39.760 | 29.035 | 1.00 | 0.00 | C |
| ATOM | 3491 | O    | GLU | 221 | 40.334 | 38.774 | 29.363 | 1.00 | 0.00 | O |
| ATOM | 3492 | N    | GLN | 222 | 39.893 | 40.378 | 27.865 | 1.00 | 0.00 | N |
| ATOM | 3493 | H    | GLN | 222 | 39.361 | 41.212 | 27.667 | 1.00 | 0.00 | H |
| ATOM | 3494 | CA   | GLN | 222 | 40.869 | 39.900 | 26.882 | 1.00 | 0.00 | C |
| ATOM | 3495 | HA   | GLN | 222 | 40.644 | 38.851 | 26.684 | 1.00 | 0.00 | H |
| ATOM | 3496 | CB   | GLN | 222 | 40.703 | 40.689 | 25.571 | 1.00 | 0.00 | C |
| ATOM | 3497 | HB2  | GLN | 222 | 39.691 | 40.525 | 25.200 | 1.00 | 0.00 | H |
| ATOM | 3498 | HB3  | GLN | 222 | 40.820 | 41.752 | 25.781 | 1.00 | 0.00 | H |
| ATOM | 3499 | CG   | GLN | 222 | 41.692 | 40.319 | 24.453 | 1.00 | 0.00 | C |
| ATOM | 3500 | HG2  | GLN | 222 | 41.536 | 40.998 | 23.615 | 1.00 | 0.00 | H |
| ATOM | 3501 | HG3  | GLN | 222 | 42.718 | 40.447 | 24.794 | 1.00 | 0.00 | H |
| ATOM | 3502 | CD   | GLN | 222 | 41.493 | 38.894 | 23.951 | 1.00 | 0.00 | C |
| ATOM | 3503 | OE1  | GLN | 222 | 40.819 | 38.659 | 22.962 | 1.00 | 0.00 | O |
| ATOM | 3504 | NE2  | GLN | 222 | 42.039 | 37.903 | 24.621 | 1.00 | 0.00 | N |
| ATOM | 3505 | HE21 | GLN | 222 | 41.836 | 36.972 | 24.301 | 1.00 | 0.00 | H |
| ATOM | 3506 | HE22 | GLN | 222 | 42.563 | 38.081 | 25.471 | 1.00 | 0.00 | H |
| ATOM | 3507 | C    | GLN | 222 | 42.309 | 39.961 | 27.415 | 1.00 | 0.00 | C |
| ATOM | 3508 | O    | GLN | 222 | 43.070 | 39.016 | 27.203 | 1.00 | 0.00 | O |
| ATOM | 3509 | N    | PHE | 223 | 42.675 | 41.042 | 28.113 | 1.00 | 0.00 | N |
| ATOM | 3510 | H    | PHE | 223 | 42.001 | 41.792 | 28.223 | 1.00 | 0.00 | H |
| ATOM | 3511 | CA   | PHE | 223 | 43.963 | 41.174 | 28.799 | 1.00 | 0.00 | C |
| ATOM | 3512 | HA   | PHE | 223 | 44.767 | 40.973 | 28.090 | 1.00 | 0.00 | H |
| ATOM | 3513 | CB   | PHE | 223 | 44.100 | 42.622 | 29.298 | 1.00 | 0.00 | C |
| ATOM | 3514 | HB2  | PHE | 223 | 44.173 | 43.284 | 28.434 | 1.00 | 0.00 | H |
| ATOM | 3515 | HB3  | PHE | 223 | 43.190 | 42.896 | 29.835 | 1.00 | 0.00 | H |
| ATOM | 3516 | CG   | PHE | 223 | 45.290 | 42.883 | 30.205 | 1.00 | 0.00 | C |
| ATOM | 3517 | CD1  | PHE | 223 | 46.599 | 42.668 | 29.734 | 1.00 | 0.00 | C |
| ATOM | 3518 | HD1  | PHE | 223 | 46.765 | 42.310 | 28.729 | 1.00 | 0.00 | H |
| ATOM | 3519 | CE1  | PHE | 223 | 47.699 | 42.912 | 30.576 | 1.00 | 0.00 | C |
| ATOM | 3520 | HE1  | PHE | 223 | 48.703 | 42.736 | 30.221 | 1.00 | 0.00 | H |
| ATOM | 3521 | CZ   | PHE | 223 | 47.498 | 43.382 | 31.885 | 1.00 | 0.00 | C |
| ATOM | 3522 | HZ   | PHE | 223 | 48.345 | 43.575 | 32.530 | 1.00 | 0.00 | H |
| ATOM | 3523 | CE2  | PHE | 223 | 46.193 | 43.601 | 32.356 | 1.00 | 0.00 | C |
| ATOM | 3524 | HE2  | PHE | 223 | 46.040 | 43.975 | 33.359 | 1.00 | 0.00 | H |
| ATOM | 3525 | CD2  | PHE | 223 | 45.091 | 43.345 | 31.522 | 1.00 | 0.00 | C |
| ATOM | 3526 | HD2  | PHE | 223 | 44.092 | 43.518 | 31.897 | 1.00 | 0.00 | H |
| ATOM | 3527 | C    | PHE | 223 | 44.106 | 40.157 | 29.942 | 1.00 | 0.00 | C |
| ATOM | 3528 | O    | PHE | 223 | 45.075 | 39.398 | 29.986 | 1.00 | 0.00 | O |
| ATOM | 3529 | N    | PHE | 224 | 43.114 | 40.091 | 30.833 | 1.00 | 0.00 | N |
| ATOM | 3530 | H    | PHE | 224 | 42.331 | 40.731 | 30.734 | 1.00 | 0.00 | H |
| ATOM | 3531 | CA   | PHE | 224 | 43.117 | 39.201 | 31.996 | 1.00 | 0.00 | C |
| ATOM | 3532 | HA   | PHE | 224 | 44.064 | 39.309 | 32.518 | 1.00 | 0.00 | H |
| ATOM | 3533 | CB   | PHE | 224 | 41.968 | 39.621 | 32.925 | 1.00 | 0.00 | C |

|      |      |          |     |        |        |        |      |      |   |
|------|------|----------|-----|--------|--------|--------|------|------|---|
| ATOM | 3534 | HB2 PHE  | 224 | 41.066 | 39.754 | 32.324 | 1.00 | 0.00 | H |
| ATOM | 3535 | HB3 PHE  | 224 | 41.755 | 38.800 | 33.605 | 1.00 | 0.00 | H |
| ATOM | 3536 | CG PHE   | 224 | 42.182 | 40.869 | 33.774 | 1.00 | 0.00 | C |
| ATOM | 3537 | CD1 PHE  | 224 | 43.457 | 41.453 | 33.968 | 1.00 | 0.00 | C |
| ATOM | 3538 | HD1 PHE  | 224 | 44.336 | 41.081 | 33.466 | 1.00 | 0.00 | H |
| ATOM | 3539 | CE1 PHE  | 224 | 43.615 | 42.544 | 34.835 | 1.00 | 0.00 | C |
| ATOM | 3540 | HE1 PHE  | 224 | 44.590 | 42.988 | 34.979 | 1.00 | 0.00 | H |
| ATOM | 3541 | CZ PHE   | 224 | 42.504 | 43.068 | 35.511 | 1.00 | 0.00 | C |
| ATOM | 3542 | HZ PHE   | 224 | 42.622 | 43.904 | 36.182 | 1.00 | 0.00 | H |
| ATOM | 3543 | CE2 PHE  | 224 | 41.234 | 42.521 | 35.298 | 1.00 | 0.00 | C |
| ATOM | 3544 | HE2 PHE  | 224 | 40.387 | 42.973 | 35.785 | 1.00 | 0.00 | H |
| ATOM | 3545 | CD2 PHE  | 224 | 41.072 | 41.419 | 34.440 | 1.00 | 0.00 | C |
| ATOM | 3546 | HD2 PHE  | 224 | 40.092 | 40.990 | 34.291 | 1.00 | 0.00 | H |
| ATOM | 3547 | C PHE    | 224 | 43.041 | 37.706 | 31.666 | 1.00 | 0.00 | C |
| ATOM | 3548 | O PHE    | 224 | 43.526 | 36.902 | 32.465 | 1.00 | 0.00 | O |
| ATOM | 3549 | N GLU    | 225 | 42.485 | 37.315 | 30.519 | 1.00 | 0.00 | N |
| ATOM | 3550 | H GLU    | 225 | 41.962 | 37.999 | 29.978 | 1.00 | 0.00 | H |
| ATOM | 3551 | CA GLU   | 225 | 42.522 | 35.934 | 30.028 | 1.00 | 0.00 | C |
| ATOM | 3552 | HA GLU   | 225 | 42.365 | 35.267 | 30.874 | 1.00 | 0.00 | H |
| ATOM | 3553 | CB GLU   | 225 | 41.351 | 35.711 | 29.052 | 1.00 | 0.00 | C |
| ATOM | 3554 | HB2 GLU  | 225 | 40.441 | 36.039 | 29.558 | 1.00 | 0.00 | H |
| ATOM | 3555 | HB3 GLU  | 225 | 41.485 | 36.326 | 28.161 | 1.00 | 0.00 | H |
| ATOM | 3556 | CG GLU   | 225 | 41.162 | 34.243 | 28.638 | 1.00 | 0.00 | C |
| ATOM | 3557 | HG2 GLU  | 225 | 41.743 | 34.044 | 27.734 | 1.00 | 0.00 | H |
| ATOM | 3558 | HG3 GLU  | 225 | 41.545 | 33.596 | 29.431 | 1.00 | 0.00 | H |
| ATOM | 3559 | CD GLU   | 225 | 39.678 | 33.907 | 28.416 | 1.00 | 0.00 | C |
| ATOM | 3560 | OE1 GLU  | 225 | 39.180 | 34.021 | 27.274 | 1.00 | 0.00 | O |
| ATOM | 3561 | OE2 GLU  | 225 | 39.000 | 33.522 | 29.402 | 1.00 | 0.00 | O |
| ATOM | 3562 | C GLU    | 225 | 43.897 | 35.566 | 29.441 | 1.00 | 0.00 | C |
| ATOM | 3563 | O GLU    | 225 | 44.430 | 34.513 | 29.792 | 1.00 | 0.00 | O |
| ATOM | 3564 | N ILE    | 226 | 44.526 | 36.455 | 28.653 | 1.00 | 0.00 | N |
| ATOM | 3565 | H ILE    | 226 | 44.050 | 37.323 | 28.436 | 1.00 | 0.00 | H |
| ATOM | 3566 | CA ILE   | 226 | 45.895 | 36.254 | 28.131 | 1.00 | 0.00 | C |
| ATOM | 3567 | HA ILE   | 226 | 45.923 | 35.310 | 27.584 | 1.00 | 0.00 | H |
| ATOM | 3568 | CB ILE   | 226 | 46.294 | 37.393 | 27.156 | 1.00 | 0.00 | C |
| ATOM | 3569 | HB ILE   | 226 | 46.050 | 38.346 | 27.628 | 1.00 | 0.00 | H |
| ATOM | 3570 | CG2 ILE  | 226 | 47.808 | 37.391 | 26.846 | 1.00 | 0.00 | C |
| ATOM | 3571 | HG21 ILE | 226 | 48.386 | 37.590 | 27.749 | 1.00 | 0.00 | H |
| ATOM | 3572 | HG22 ILE | 226 | 48.060 | 38.170 | 26.130 | 1.00 | 0.00 | H |
| ATOM | 3573 | HG23 ILE | 226 | 48.106 | 36.422 | 26.443 | 1.00 | 0.00 | H |
| ATOM | 3574 | CG1 ILE  | 226 | 45.499 | 37.275 | 25.835 | 1.00 | 0.00 | C |
| ATOM | 3575 | HG12 ILE | 226 | 45.894 | 36.448 | 25.244 | 1.00 | 0.00 | H |
| ATOM | 3576 | HG13 ILE | 226 | 44.457 | 37.048 | 26.059 | 1.00 | 0.00 | H |
| ATOM | 3577 | CD1 ILE  | 226 | 45.520 | 38.557 | 24.988 | 1.00 | 0.00 | C |
| ATOM | 3578 | HD11 ILE | 226 | 45.138 | 39.396 | 25.568 | 1.00 | 0.00 | H |
| ATOM | 3579 | HD12 ILE | 226 | 44.893 | 38.419 | 24.107 | 1.00 | 0.00 | H |
| ATOM | 3580 | HD13 ILE | 226 | 46.532 | 38.786 | 24.660 | 1.00 | 0.00 | H |
| ATOM | 3581 | C ILE    | 226 | 46.899 | 36.119 | 29.284 | 1.00 | 0.00 | C |
| ATOM | 3582 | O ILE    | 226 | 47.653 | 35.147 | 29.336 | 1.00 | 0.00 | O |
| ATOM | 3583 | N VAL    | 227 | 46.881 | 37.059 | 30.237 | 1.00 | 0.00 | N |
| ATOM | 3584 | H VAL    | 227 | 46.235 | 37.837 | 30.134 | 1.00 | 0.00 | H |
| ATOM | 3585 | CA VAL   | 227 | 47.780 | 37.033 | 31.402 | 1.00 | 0.00 | C |



|      |      |      |     |     |        |        |        |      |      |   |
|------|------|------|-----|-----|--------|--------|--------|------|------|---|
| ATOM | 3586 | HA   | VAL | 227 | 48.809 | 37.003 | 31.044 | 1.00 | 0.00 | H |
| ATOM | 3587 | CB   | VAL | 227 | 47.607 | 38.314 | 32.248 | 1.00 | 0.00 | C |
| ATOM | 3588 | HB   | VAL | 227 | 46.546 | 38.463 | 32.455 | 1.00 | 0.00 | H |
| ATOM | 3589 | CG1  | VAL | 227 | 48.351 | 38.265 | 33.590 | 1.00 | 0.00 | C |
| ATOM | 3590 | HG11 | VAL | 227 | 49.406 | 38.041 | 33.428 | 1.00 | 0.00 | H |
| ATOM | 3591 | HG12 | VAL | 227 | 48.266 | 39.227 | 34.097 | 1.00 | 0.00 | H |
| ATOM | 3592 | HG13 | VAL | 227 | 47.916 | 37.504 | 34.236 | 1.00 | 0.00 | H |
| ATOM | 3593 | CG2  | VAL | 227 | 48.140 | 39.534 | 31.486 | 1.00 | 0.00 | C |
| ATOM | 3594 | HG21 | VAL | 227 | 47.622 | 39.647 | 30.534 | 1.00 | 0.00 | H |
| ATOM | 3595 | HG22 | VAL | 227 | 49.208 | 39.426 | 31.300 | 1.00 | 0.00 | H |
| ATOM | 3596 | HG23 | VAL | 227 | 47.970 | 40.436 | 32.074 | 1.00 | 0.00 | H |
| ATOM | 3597 | C    | VAL | 227 | 47.575 | 35.763 | 32.236 | 1.00 | 0.00 | C |
| ATOM | 3598 | O    | VAL | 227 | 48.554 | 35.176 | 32.692 | 1.00 | 0.00 | O |
| ATOM | 3599 | N    | CYS | 228 | 46.333 | 35.300 | 32.415 | 1.00 | 0.00 | N |
| ATOM | 3600 | H    | CYS | 228 | 45.565 | 35.789 | 31.976 | 1.00 | 0.00 | H |
| ATOM | 3601 | CA   | CYS | 228 | 46.035 | 34.102 | 33.204 | 1.00 | 0.00 | C |
| ATOM | 3602 | HA   | CYS | 228 | 46.566 | 34.172 | 34.153 | 1.00 | 0.00 | H |
| ATOM | 3603 | CB   | CYS | 228 | 44.528 | 34.069 | 33.488 | 1.00 | 0.00 | C |
| ATOM | 3604 | HB2  | CYS | 228 | 44.210 | 35.033 | 33.874 | 1.00 | 0.00 | H |
| ATOM | 3605 | HB3  | CYS | 228 | 43.983 | 33.865 | 32.564 | 1.00 | 0.00 | H |
| ATOM | 3606 | SG   | CYS | 228 | 44.140 | 32.793 | 34.718 | 1.00 | 0.00 | S |
| ATOM | 3607 | HG   | CYS | 228 | 44.716 | 33.396 | 35.763 | 1.00 | 0.00 | H |
| ATOM | 3608 | C    | CYS | 228 | 46.494 | 32.795 | 32.535 | 1.00 | 0.00 | C |
| ATOM | 3609 | O    | CYS | 228 | 47.100 | 31.948 | 33.200 | 1.00 | 0.00 | O |
| ATOM | 3610 | N    | ASP | 229 | 46.208 | 32.613 | 31.241 | 1.00 | 0.00 | N |
| ATOM | 3611 | H    | ASP | 229 | 45.705 | 33.336 | 30.732 | 1.00 | 0.00 | H |
| ATOM | 3612 | CA   | ASP | 229 | 46.538 | 31.368 | 30.536 | 1.00 | 0.00 | C |
| ATOM | 3613 | HA   | ASP | 229 | 46.218 | 30.536 | 31.160 | 1.00 | 0.00 | H |
| ATOM | 3614 | CB   | ASP | 229 | 45.766 | 31.286 | 29.205 | 1.00 | 0.00 | C |
| ATOM | 3615 | HB2  | ASP | 229 | 44.757 | 31.671 | 29.362 | 1.00 | 0.00 | H |
| ATOM | 3616 | HB3  | ASP | 229 | 46.256 | 31.919 | 28.462 | 1.00 | 0.00 | H |
| ATOM | 3617 | CG   | ASP | 229 | 45.625 | 29.854 | 28.663 | 1.00 | 0.00 | C |
| ATOM | 3618 | OD1  | ASP | 229 | 45.471 | 28.892 | 29.457 | 1.00 | 0.00 | O |
| ATOM | 3619 | OD2  | ASP | 229 | 45.634 | 29.668 | 27.424 | 1.00 | 0.00 | O |
| ATOM | 3620 | C    | ASP | 229 | 48.053 | 31.216 | 30.337 | 1.00 | 0.00 | C |
| ATOM | 3621 | O    | ASP | 229 | 48.580 | 30.115 | 30.474 | 1.00 | 0.00 | O |
| ATOM | 3622 | N    | GLU | 230 | 48.770 | 32.314 | 30.079 | 1.00 | 0.00 | N |
| ATOM | 3623 | H    | GLU | 230 | 48.284 | 33.196 | 29.947 | 1.00 | 0.00 | H |
| ATOM | 3624 | CA   | GLU | 230 | 50.232 | 32.302 | 29.983 | 1.00 | 0.00 | C |
| ATOM | 3625 | HA   | GLU | 230 | 50.538 | 31.411 | 29.436 | 1.00 | 0.00 | H |
| ATOM | 3626 | CB   | GLU | 230 | 50.701 | 33.532 | 29.189 | 1.00 | 0.00 | C |
| ATOM | 3627 | HB2  | GLU | 230 | 50.299 | 34.438 | 29.646 | 1.00 | 0.00 | H |
| ATOM | 3628 | HB3  | GLU | 230 | 51.780 | 33.597 | 29.255 | 1.00 | 0.00 | H |
| ATOM | 3629 | CG   | GLU | 230 | 50.310 | 33.494 | 27.697 | 1.00 | 0.00 | C |
| ATOM | 3630 | HG2  | GLU | 230 | 49.244 | 33.717 | 27.613 | 1.00 | 0.00 | H |
| ATOM | 3631 | HG3  | GLU | 230 | 50.850 | 34.287 | 27.176 | 1.00 | 0.00 | H |
| ATOM | 3632 | CD   | GLU | 230 | 50.592 | 32.148 | 27.004 | 1.00 | 0.00 | C |
| ATOM | 3633 | OE1  | GLU | 230 | 51.706 | 31.597 | 27.167 | 1.00 | 0.00 | O |
| ATOM | 3634 | OE2  | GLU | 230 | 49.677 | 31.635 | 26.309 | 1.00 | 0.00 | O |
| ATOM | 3635 | C    | GLU | 230 | 50.923 | 32.167 | 31.350 | 1.00 | 0.00 | C |
| ATOM | 3636 | O    | GLU | 230 | 51.783 | 31.302 | 31.492 | 1.00 | 0.00 | O |
| ATOM | 3637 | N    | THR | 231 | 50.504 | 32.903 | 32.392 | 1.00 | 0.00 | N |

|      |      |      |     |     |        |        |        |      |      |   |
|------|------|------|-----|-----|--------|--------|--------|------|------|---|
| ATOM | 3638 | H    | THR | 231 | 49.770 | 33.585 | 32.243 | 1.00 | 0.00 | H |
| ATOM | 3639 | CA   | THR | 231 | 51.096 | 32.769 | 33.746 | 1.00 | 0.00 | C |
| ATOM | 3640 | HA   | THR | 231 | 52.139 | 33.085 | 33.706 | 1.00 | 0.00 | H |
| ATOM | 3641 | CB   | THR | 231 | 50.368 | 33.651 | 34.777 | 1.00 | 0.00 | C |
| ATOM | 3642 | HB   | THR | 231 | 49.304 | 33.408 | 34.769 | 1.00 | 0.00 | H |
| ATOM | 3643 | CG2  | THR | 231 | 50.886 | 33.482 | 36.204 | 1.00 | 0.00 | C |
| ATOM | 3644 | HG21 | THR | 231 | 51.970 | 33.605 | 36.222 | 1.00 | 0.00 | H |
| ATOM | 3645 | HG22 | THR | 231 | 50.618 | 32.498 | 36.580 | 1.00 | 0.00 | H |
| ATOM | 3646 | HG23 | THR | 231 | 50.431 | 34.231 | 36.847 | 1.00 | 0.00 | H |
| ATOM | 3647 | OG1  | THR | 231 | 50.514 | 35.014 | 34.470 | 1.00 | 0.00 | O |
| ATOM | 3648 | HG1  | THR | 231 | 49.913 | 35.190 | 33.725 | 1.00 | 0.00 | H |
| ATOM | 3649 | C    | THR | 231 | 51.073 | 31.318 | 34.240 | 1.00 | 0.00 | C |
| ATOM | 3650 | O    | THR | 231 | 52.066 | 30.829 | 34.779 | 1.00 | 0.00 | O |
| ATOM | 3651 | N    | GLU | 232 | 49.957 | 30.611 | 34.023 | 1.00 | 0.00 | N |
| ATOM | 3652 | H    | GLU | 232 | 49.187 | 31.067 | 33.546 | 1.00 | 0.00 | H |
| ATOM | 3653 | CA   | GLU | 232 | 49.798 | 29.202 | 34.399 | 1.00 | 0.00 | C |
| ATOM | 3654 | HA   | GLU | 232 | 50.026 | 29.091 | 35.461 | 1.00 | 0.00 | H |
| ATOM | 3655 | CB   | GLU | 232 | 48.333 | 28.799 | 34.167 | 1.00 | 0.00 | C |
| ATOM | 3656 | HB2  | GLU | 232 | 47.692 | 29.443 | 34.771 | 1.00 | 0.00 | H |
| ATOM | 3657 | HB3  | GLU | 232 | 48.093 | 28.967 | 33.116 | 1.00 | 0.00 | H |
| ATOM | 3658 | CG   | GLU | 232 | 48.033 | 27.335 | 34.526 | 1.00 | 0.00 | C |
| ATOM | 3659 | HG2  | GLU | 232 | 48.679 | 26.673 | 33.948 | 1.00 | 0.00 | H |
| ATOM | 3660 | HG3  | GLU | 232 | 48.248 | 27.183 | 35.587 | 1.00 | 0.00 | H |
| ATOM | 3661 | CD   | GLU | 232 | 46.578 | 26.952 | 34.233 | 1.00 | 0.00 | C |
| ATOM | 3662 | OE1  | GLU | 232 | 46.026 | 27.427 | 33.207 | 1.00 | 0.00 | O |
| ATOM | 3663 | OE2  | GLU | 232 | 46.003 | 26.165 | 35.020 | 1.00 | 0.00 | O |
| ATOM | 3664 | C    | GLU | 232 | 50.757 | 28.277 | 33.631 | 1.00 | 0.00 | C |
| ATOM | 3665 | O    | GLU | 232 | 51.474 | 27.485 | 34.250 | 1.00 | 0.00 | O |
| ATOM | 3666 | N    | LYS | 233 | 50.826 | 28.403 | 32.296 | 1.00 | 0.00 | N |
| ATOM | 3667 | H    | LYS | 233 | 50.232 | 29.096 | 31.849 | 1.00 | 0.00 | H |
| ATOM | 3668 | CA   | LYS | 233 | 51.771 | 27.642 | 31.452 | 1.00 | 0.00 | C |
| ATOM | 3669 | HA   | LYS | 233 | 51.578 | 26.573 | 31.552 | 1.00 | 0.00 | H |
| ATOM | 3670 | CB   | LYS | 233 | 51.622 | 28.060 | 29.980 | 1.00 | 0.00 | C |
| ATOM | 3671 | HB2  | LYS | 233 | 51.720 | 29.146 | 29.924 | 1.00 | 0.00 | H |
| ATOM | 3672 | HB3  | LYS | 233 | 52.433 | 27.621 | 29.395 | 1.00 | 0.00 | H |
| ATOM | 3673 | CG   | LYS | 233 | 50.291 | 27.633 | 29.346 | 1.00 | 0.00 | C |
| ATOM | 3674 | HG2  | LYS | 233 | 50.311 | 26.564 | 29.133 | 1.00 | 0.00 | H |
| ATOM | 3675 | HG3  | LYS | 233 | 49.480 | 27.821 | 30.047 | 1.00 | 0.00 | H |
| ATOM | 3676 | CD   | LYS | 233 | 50.042 | 28.417 | 28.048 | 1.00 | 0.00 | C |
| ATOM | 3677 | HD2  | LYS | 233 | 50.345 | 29.455 | 28.189 | 1.00 | 0.00 | H |
| ATOM | 3678 | HD3  | LYS | 233 | 50.625 | 27.988 | 27.232 | 1.00 | 0.00 | H |
| ATOM | 3679 | CE   | LYS | 233 | 48.552 | 28.405 | 27.712 | 1.00 | 0.00 | C |
| ATOM | 3680 | HE2  | LYS | 233 | 48.229 | 27.389 | 27.471 | 1.00 | 0.00 | H |
| ATOM | 3681 | HE3  | LYS | 233 | 48.011 | 28.723 | 28.609 | 1.00 | 0.00 | H |
| ATOM | 3682 | NZ   | LYS | 233 | 48.232 | 29.337 | 26.606 | 1.00 | 0.00 | N |
| ATOM | 3683 | HZ1  | LYS | 233 | 47.233 | 29.550 | 26.627 | 1.00 | 0.00 | H |
| ATOM | 3684 | HZ2  | LYS | 233 | 48.479 | 28.958 | 25.707 | 1.00 | 0.00 | H |
| ATOM | 3685 | HZ3  | LYS | 233 | 48.735 | 30.223 | 26.706 | 1.00 | 0.00 | H |
| ATOM | 3686 | C    | LYS | 233 | 53.215 | 27.882 | 31.887 | 1.00 | 0.00 | C |
| ATOM | 3687 | O    | LYS | 233 | 54.039 | 26.973 | 31.853 | 1.00 | 0.00 | O |
| ATOM | 3688 | N    | HIE | 234 | 53.524 | 29.107 | 32.311 | 1.00 | 0.00 | N |
| ATOM | 3689 | H    | HIE | 234 | 52.798 | 29.817 | 32.252 | 1.00 | 0.00 | H |

|      |      |     |     |     |        |        |        |      |      |   |
|------|------|-----|-----|-----|--------|--------|--------|------|------|---|
| ATOM | 3690 | CA  | HIE | 234 | 54.855 | 29.531 | 32.745 | 1.00 | 0.00 | C |
| ATOM | 3691 | HA  | HIE | 234 | 55.591 | 28.945 | 32.192 | 1.00 | 0.00 | H |
| ATOM | 3692 | CB  | HIE | 234 | 55.078 | 31.009 | 32.368 | 1.00 | 0.00 | C |
| ATOM | 3693 | HB2 | HIE | 234 | 54.474 | 31.621 | 33.040 | 1.00 | 0.00 | H |
| ATOM | 3694 | HB3 | HIE | 234 | 56.124 | 31.256 | 32.551 | 1.00 | 0.00 | H |
| ATOM | 3695 | CG  | HIE | 234 | 54.743 | 31.434 | 30.944 | 1.00 | 0.00 | C |
| ATOM | 3696 | ND1 | HIE | 234 | 54.662 | 32.768 | 30.548 | 1.00 | 0.00 | N |
| ATOM | 3697 | CE1 | HIE | 234 | 54.195 | 32.765 | 29.293 | 1.00 | 0.00 | C |
| ATOM | 3698 | HE1 | HIE | 234 | 53.941 | 33.654 | 28.731 | 1.00 | 0.00 | H |
| ATOM | 3699 | NE2 | HIE | 234 | 53.966 | 31.513 | 28.877 | 1.00 | 0.00 | N |
| ATOM | 3700 | HE2 | HIE | 234 | 53.370 | 31.291 | 28.072 | 1.00 | 0.00 | H |
| ATOM | 3701 | CD2 | HIE | 234 | 54.354 | 30.655 | 29.885 | 1.00 | 0.00 | C |
| ATOM | 3702 | HD2 | HIE | 234 | 54.253 | 29.583 | 29.879 | 1.00 | 0.00 | H |
| ATOM | 3703 | C   | HIE | 234 | 55.111 | 29.228 | 34.238 | 1.00 | 0.00 | C |
| ATOM | 3704 | O   | HIE | 234 | 56.051 | 29.767 | 34.826 | 1.00 | 0.00 | O |
| ATOM | 3705 | N   | SER | 235 | 54.327 | 28.331 | 34.858 | 1.00 | 0.00 | N |
| ATOM | 3706 | H   | SER | 235 | 53.533 | 27.983 | 34.330 | 1.00 | 0.00 | H |
| ATOM | 3707 | CA  | SER | 235 | 54.462 | 27.806 | 36.236 | 1.00 | 0.00 | C |
| ATOM | 3708 | HA  | SER | 235 | 53.645 | 27.093 | 36.350 | 1.00 | 0.00 | H |
| ATOM | 3709 | CB  | SER | 235 | 55.756 | 26.988 | 36.394 | 1.00 | 0.00 | C |
| ATOM | 3710 | HB2 | SER | 235 | 55.728 | 26.437 | 37.335 | 1.00 | 0.00 | H |
| ATOM | 3711 | HB3 | SER | 235 | 55.827 | 26.269 | 35.576 | 1.00 | 0.00 | H |
| ATOM | 3712 | OG  | SER | 235 | 56.896 | 27.830 | 36.379 | 1.00 | 0.00 | O |
| ATOM | 3713 | HG  | SER | 235 | 56.669 | 28.559 | 35.765 | 1.00 | 0.00 | H |
| ATOM | 3714 | C   | SER | 235 | 54.241 | 28.818 | 37.376 | 1.00 | 0.00 | C |
| ATOM | 3715 | O   | SER | 235 | 54.702 | 28.597 | 38.498 | 1.00 | 0.00 | O |
| ATOM | 3716 | N   | GLY | 236 | 53.545 | 29.922 | 37.096 | 1.00 | 0.00 | N |
| ATOM | 3717 | H   | GLY | 236 | 53.152 | 30.017 | 36.164 | 1.00 | 0.00 | H |
| ATOM | 3718 | CA  | GLY | 236 | 53.100 | 30.901 | 38.090 | 1.00 | 0.00 | C |
| ATOM | 3719 | HA2 | GLY | 236 | 53.694 | 30.817 | 39.001 | 1.00 | 0.00 | H |
| ATOM | 3720 | HA3 | GLY | 236 | 53.244 | 31.905 | 37.691 | 1.00 | 0.00 | H |
| ATOM | 3721 | C   | GLY | 236 | 51.622 | 30.736 | 38.448 | 1.00 | 0.00 | C |
| ATOM | 3722 | O   | GLY | 236 | 50.914 | 29.896 | 37.888 | 1.00 | 0.00 | O |
| ATOM | 3723 | N   | LYS | 237 | 51.126 | 31.572 | 39.366 | 1.00 | 0.00 | N |
| ATOM | 3724 | H   | LYS | 237 | 51.780 | 32.193 | 39.837 | 1.00 | 0.00 | H |
| ATOM | 3725 | CA  | LYS | 237 | 49.710 | 31.588 | 39.769 | 1.00 | 0.00 | C |
| ATOM | 3726 | HA  | LYS | 237 | 49.119 | 31.169 | 38.953 | 1.00 | 0.00 | H |
| ATOM | 3727 | CB  | LYS | 237 | 49.535 | 30.688 | 41.002 | 1.00 | 0.00 | C |
| ATOM | 3728 | HB2 | LYS | 237 | 50.065 | 29.747 | 40.839 | 1.00 | 0.00 | H |
| ATOM | 3729 | HB3 | LYS | 237 | 49.957 | 31.178 | 41.881 | 1.00 | 0.00 | H |
| ATOM | 3730 | CG  | LYS | 237 | 48.054 | 30.374 | 41.234 | 1.00 | 0.00 | C |
| ATOM | 3731 | HG2 | LYS | 237 | 47.487 | 31.297 | 41.344 | 1.00 | 0.00 | H |
| ATOM | 3732 | HG3 | LYS | 237 | 47.677 | 29.838 | 40.363 | 1.00 | 0.00 | H |
| ATOM | 3733 | CD  | LYS | 237 | 47.846 | 29.527 | 42.489 | 1.00 | 0.00 | C |
| ATOM | 3734 | HD2 | LYS | 237 | 48.522 | 28.672 | 42.468 | 1.00 | 0.00 | H |
| ATOM | 3735 | HD3 | LYS | 237 | 48.046 | 30.133 | 43.374 | 1.00 | 0.00 | H |
| ATOM | 3736 | CE  | LYS | 237 | 46.398 | 29.035 | 42.490 | 1.00 | 0.00 | C |
| ATOM | 3737 | HE2 | LYS | 237 | 45.731 | 29.880 | 42.298 | 1.00 | 0.00 | H |
| ATOM | 3738 | HE3 | LYS | 237 | 46.280 | 28.325 | 41.668 | 1.00 | 0.00 | H |
| ATOM | 3739 | NZ  | LYS | 237 | 46.023 | 28.384 | 43.762 | 1.00 | 0.00 | N |
| ATOM | 3740 | HZ1 | LYS | 237 | 46.028 | 29.065 | 44.513 | 1.00 | 0.00 | H |
| ATOM | 3741 | HZ2 | LYS | 237 | 46.673 | 27.622 | 43.965 | 1.00 | 0.00 | H |

|      |      |          |     |        |        |        |      |      |   |
|------|------|----------|-----|--------|--------|--------|------|------|---|
| ATOM | 3742 | HZ3 LYS  | 237 | 45.079 | 28.020 | 43.678 | 1.00 | 0.00 | H |
| ATOM | 3743 | C LYS    | 237 | 49.202 | 33.001 | 40.039 | 1.00 | 0.00 | C |
| ATOM | 3744 | O LYS    | 237 | 49.842 | 33.751 | 40.774 | 1.00 | 0.00 | O |
| ATOM | 3745 | N LEU    | 238 | 48.033 | 33.356 | 39.496 | 1.00 | 0.00 | N |
| ATOM | 3746 | H LEU    | 238 | 47.541 | 32.683 | 38.932 | 1.00 | 0.00 | H |
| ATOM | 3747 | CA LEU   | 238 | 47.350 | 34.606 | 39.855 | 1.00 | 0.00 | C |
| ATOM | 3748 | HA LEU   | 238 | 48.050 | 35.432 | 39.733 | 1.00 | 0.00 | H |
| ATOM | 3749 | CB LEU   | 238 | 46.135 | 34.886 | 38.952 | 1.00 | 0.00 | C |
| ATOM | 3750 | HB2 LEU  | 238 | 45.391 | 34.103 | 39.109 | 1.00 | 0.00 | H |
| ATOM | 3751 | HB3 LEU  | 238 | 45.696 | 35.825 | 39.294 | 1.00 | 0.00 | H |
| ATOM | 3752 | CG LEU   | 238 | 46.400 | 35.005 | 37.439 | 1.00 | 0.00 | C |
| ATOM | 3753 | HG LEU   | 238 | 46.577 | 34.013 | 37.022 | 1.00 | 0.00 | H |
| ATOM | 3754 | CD1 LEU  | 238 | 45.167 | 35.614 | 36.775 | 1.00 | 0.00 | C |
| ATOM | 3755 | HD11 LEU | 238 | 44.295 | 34.982 | 36.946 | 1.00 | 0.00 | H |
| ATOM | 3756 | HD12 LEU | 238 | 45.333 | 35.717 | 35.705 | 1.00 | 0.00 | H |
| ATOM | 3757 | HD13 LEU | 238 | 44.971 | 36.603 | 37.190 | 1.00 | 0.00 | H |
| ATOM | 3758 | CD2 LEU  | 238 | 47.585 | 35.902 | 37.090 | 1.00 | 0.00 | C |
| ATOM | 3759 | HD21 LEU | 238 | 47.472 | 36.882 | 37.555 | 1.00 | 0.00 | H |
| ATOM | 3760 | HD22 LEU | 238 | 48.505 | 35.435 | 37.424 | 1.00 | 0.00 | H |
| ATOM | 3761 | HD23 LEU | 238 | 47.657 | 36.018 | 36.009 | 1.00 | 0.00 | H |
| ATOM | 3762 | C LEU    | 238 | 46.918 | 34.592 | 41.331 | 1.00 | 0.00 | C |
| ATOM | 3763 | O LEU    | 238 | 46.355 | 33.611 | 41.817 | 1.00 | 0.00 | O |
| ATOM | 3764 | N GLY    | 239 | 47.168 | 35.698 | 42.032 | 1.00 | 0.00 | N |
| ATOM | 3765 | H GLY    | 239 | 47.628 | 36.465 | 41.553 | 1.00 | 0.00 | H |
| ATOM | 3766 | CA GLY   | 239 | 46.756 | 35.903 | 43.421 | 1.00 | 0.00 | C |
| ATOM | 3767 | HA2 GLY  | 239 | 46.545 | 34.945 | 43.897 | 1.00 | 0.00 | H |
| ATOM | 3768 | HA3 GLY  | 239 | 47.574 | 36.373 | 43.962 | 1.00 | 0.00 | H |
| ATOM | 3769 | C GLY    | 239 | 45.520 | 36.793 | 43.559 | 1.00 | 0.00 | C |
| ATOM | 3770 | O GLY    | 239 | 44.668 | 36.502 | 44.394 | 1.00 | 0.00 | O |
| ATOM | 3771 | N THR    | 240 | 45.409 | 37.845 | 42.737 | 1.00 | 0.00 | N |
| ATOM | 3772 | H THR    | 240 | 46.160 | 38.017 | 42.078 | 1.00 | 0.00 | H |
| ATOM | 3773 | CA THR   | 240 | 44.238 | 38.741 | 42.631 | 1.00 | 0.00 | C |
| ATOM | 3774 | HA THR   | 240 | 43.333 | 38.146 | 42.753 | 1.00 | 0.00 | H |
| ATOM | 3775 | CB THR   | 240 | 44.219 | 39.860 | 43.701 | 1.00 | 0.00 | C |
| ATOM | 3776 | HB THR   | 240 | 43.420 | 40.556 | 43.442 | 1.00 | 0.00 | H |
| ATOM | 3777 | CG2 THR  | 240 | 43.964 | 39.387 | 45.129 | 1.00 | 0.00 | C |
| ATOM | 3778 | HG21 THR | 240 | 44.814 | 38.822 | 45.508 | 1.00 | 0.00 | H |
| ATOM | 3779 | HG22 THR | 240 | 43.069 | 38.766 | 45.158 | 1.00 | 0.00 | H |
| ATOM | 3780 | HG23 THR | 240 | 43.810 | 40.255 | 45.770 | 1.00 | 0.00 | H |
| ATOM | 3781 | OG1 THR  | 240 | 45.428 | 40.577 | 43.741 | 1.00 | 0.00 | O |
| ATOM | 3782 | HG1 THR  | 240 | 46.047 | 40.046 | 44.251 | 1.00 | 0.00 | H |
| ATOM | 3783 | C THR    | 240 | 44.180 | 39.410 | 41.249 | 1.00 | 0.00 | C |
| ATOM | 3784 | O THR    | 240 | 45.214 | 39.715 | 40.655 | 1.00 | 0.00 | O |
| ATOM | 3785 | N TYR    | 241 | 42.966 | 39.678 | 40.756 | 1.00 | 0.00 | N |
| ATOM | 3786 | H TYR    | 241 | 42.166 | 39.382 | 41.292 | 1.00 | 0.00 | H |
| ATOM | 3787 | CA TYR   | 241 | 42.710 | 40.775 | 39.814 | 1.00 | 0.00 | C |
| ATOM | 3788 | HA TYR   | 241 | 43.623 | 41.039 | 39.278 | 1.00 | 0.00 | H |
| ATOM | 3789 | CB TYR   | 241 | 41.628 | 40.399 | 38.789 | 1.00 | 0.00 | C |
| ATOM | 3790 | HB2 TYR  | 241 | 40.692 | 40.223 | 39.322 | 1.00 | 0.00 | H |
| ATOM | 3791 | HB3 TYR  | 241 | 41.471 | 41.268 | 38.150 | 1.00 | 0.00 | H |
| ATOM | 3792 | CG TYR   | 241 | 41.900 | 39.221 | 37.870 | 1.00 | 0.00 | C |
| ATOM | 3793 | CD1 TYR  | 241 | 41.088 | 38.071 | 37.937 | 1.00 | 0.00 | C |

|      |      |          |     |        |        |        |      |      |   |
|------|------|----------|-----|--------|--------|--------|------|------|---|
| ATOM | 3794 | HD1 TYR  | 241 | 40.335 | 37.994 | 38.706 | 1.00 | 0.00 | H |
| ATOM | 3795 | CE1 TYR  | 241 | 41.224 | 37.048 | 36.976 | 1.00 | 0.00 | C |
| ATOM | 3796 | HE1 TYR  | 241 | 40.586 | 36.177 | 36.996 | 1.00 | 0.00 | H |
| ATOM | 3797 | CZ TYR   | 241 | 42.180 | 37.175 | 35.945 | 1.00 | 0.00 | C |
| ATOM | 3798 | OH TYR   | 241 | 42.249 | 36.227 | 34.974 | 1.00 | 0.00 | O |
| ATOM | 3799 | HH TYR   | 241 | 42.746 | 36.527 | 34.198 | 1.00 | 0.00 | H |
| ATOM | 3800 | CE2 TYR  | 241 | 43.029 | 38.303 | 35.909 | 1.00 | 0.00 | C |
| ATOM | 3801 | HE2 TYR  | 241 | 43.763 | 38.400 | 35.124 | 1.00 | 0.00 | H |
| ATOM | 3802 | CD2 TYR  | 241 | 42.878 | 39.329 | 36.863 | 1.00 | 0.00 | C |
| ATOM | 3803 | HD2 TYR  | 241 | 43.479 | 40.226 | 36.791 | 1.00 | 0.00 | H |
| ATOM | 3804 | C TYR    | 241 | 42.231 | 41.996 | 40.615 | 1.00 | 0.00 | C |
| ATOM | 3805 | O TYR    | 241 | 41.452 | 41.830 | 41.557 | 1.00 | 0.00 | O |
| ATOM | 3806 | N LEU    | 242 | 42.637 | 43.209 | 40.236 | 1.00 | 0.00 | N |
| ATOM | 3807 | H LEU    | 242 | 43.280 | 43.284 | 39.452 | 1.00 | 0.00 | H |
| ATOM | 3808 | CA LEU   | 242 | 42.210 | 44.443 | 40.896 | 1.00 | 0.00 | C |
| ATOM | 3809 | HA LEU   | 242 | 41.208 | 44.280 | 41.293 | 1.00 | 0.00 | H |
| ATOM | 3810 | CB LEU   | 242 | 43.153 | 44.743 | 42.079 | 1.00 | 0.00 | C |
| ATOM | 3811 | HB2 LEU  | 242 | 43.332 | 43.838 | 42.663 | 1.00 | 0.00 | H |
| ATOM | 3812 | HB3 LEU  | 242 | 44.112 | 45.081 | 41.684 | 1.00 | 0.00 | H |
| ATOM | 3813 | CG LEU   | 242 | 42.537 | 45.828 | 42.979 | 1.00 | 0.00 | C |
| ATOM | 3814 | HG LEU   | 242 | 42.029 | 46.552 | 42.348 | 1.00 | 0.00 | H |
| ATOM | 3815 | CD1 LEU  | 242 | 41.533 | 45.201 | 43.943 | 1.00 | 0.00 | C |
| ATOM | 3816 | HD11 LEU | 242 | 40.673 | 44.831 | 43.390 | 1.00 | 0.00 | H |
| ATOM | 3817 | HD12 LEU | 242 | 41.197 | 45.941 | 44.667 | 1.00 | 0.00 | H |
| ATOM | 3818 | HD13 LEU | 242 | 41.992 | 44.374 | 44.487 | 1.00 | 0.00 | H |
| ATOM | 3819 | CD2 LEU  | 242 | 43.559 | 46.598 | 43.806 | 1.00 | 0.00 | C |
| ATOM | 3820 | HD21 LEU | 242 | 43.705 | 46.093 | 44.754 | 1.00 | 0.00 | H |
| ATOM | 3821 | HD22 LEU | 242 | 44.505 | 46.662 | 43.273 | 1.00 | 0.00 | H |
| ATOM | 3822 | HD23 LEU | 242 | 43.175 | 47.594 | 44.019 | 1.00 | 0.00 | H |
| ATOM | 3823 | C LEU    | 242 | 42.131 | 45.623 | 39.914 | 1.00 | 0.00 | C |
| ATOM | 3824 | O LEU    | 242 | 43.147 | 46.202 | 39.526 | 1.00 | 0.00 | O |
| ATOM | 3825 | N GLY    | 243 | 40.910 | 46.014 | 39.543 | 1.00 | 0.00 | N |
| ATOM | 3826 | H GLY    | 243 | 40.111 | 45.496 | 39.876 | 1.00 | 0.00 | H |
| ATOM | 3827 | CA GLY   | 243 | 40.686 | 47.067 | 38.553 | 1.00 | 0.00 | C |
| ATOM | 3828 | HA2 GLY  | 243 | 39.621 | 47.275 | 38.471 | 1.00 | 0.00 | H |
| ATOM | 3829 | HA3 GLY  | 243 | 41.203 | 47.971 | 38.868 | 1.00 | 0.00 | H |
| ATOM | 3830 | C GLY    | 243 | 41.211 | 46.665 | 37.178 | 1.00 | 0.00 | C |
| ATOM | 3831 | O GLY    | 243 | 40.761 | 45.672 | 36.615 | 1.00 | 0.00 | O |
| ATOM | 3832 | N ASP    | 244 | 42.170 | 47.429 | 36.656 | 1.00 | 0.00 | N |
| ATOM | 3833 | H ASP    | 244 | 42.487 | 48.232 | 37.180 | 1.00 | 0.00 | H |
| ATOM | 3834 | CA ASP   | 244 | 42.892 | 47.123 | 35.414 | 1.00 | 0.00 | C |
| ATOM | 3835 | HA ASP   | 244 | 42.207 | 46.637 | 34.720 | 1.00 | 0.00 | H |
| ATOM | 3836 | CB ASP   | 244 | 43.369 | 48.433 | 34.771 | 1.00 | 0.00 | C |
| ATOM | 3837 | HB2 ASP  | 244 | 43.579 | 48.238 | 33.721 | 1.00 | 0.00 | H |
| ATOM | 3838 | HB3 ASP  | 244 | 42.566 | 49.168 | 34.813 | 1.00 | 0.00 | H |
| ATOM | 3839 | CG ASP   | 244 | 44.624 | 49.023 | 35.425 | 1.00 | 0.00 | C |
| ATOM | 3840 | OD1 ASP  | 244 | 44.796 | 48.962 | 36.681 | 1.00 | 0.00 | O |
| ATOM | 3841 | OD2 ASP  | 244 | 45.471 | 49.595 | 34.696 | 1.00 | 0.00 | O |
| ATOM | 3842 | C ASP    | 244 | 44.107 | 46.190 | 35.600 | 1.00 | 0.00 | C |
| ATOM | 3843 | O ASP    | 244 | 44.780 | 45.877 | 34.618 | 1.00 | 0.00 | O |
| ATOM | 3844 | N GLY    | 245 | 44.448 | 45.823 | 36.842 | 1.00 | 0.00 | N |
| ATOM | 3845 | H GLY    | 245 | 43.845 | 46.094 | 37.609 | 1.00 | 0.00 | H |

|      |      |      |     |     |        |        |        |      |      |   |
|------|------|------|-----|-----|--------|--------|--------|------|------|---|
| ATOM | 3846 | CA   | GLY | 245 | 45.702 | 45.146 | 37.177 | 1.00 | 0.00 | C |
| ATOM | 3847 | HA2  | GLY | 245 | 46.349 | 45.158 | 36.304 | 1.00 | 0.00 | H |
| ATOM | 3848 | HA3  | GLY | 245 | 46.209 | 45.698 | 37.968 | 1.00 | 0.00 | H |
| ATOM | 3849 | C    | GLY | 245 | 45.558 | 43.693 | 37.625 | 1.00 | 0.00 | C |
| ATOM | 3850 | O    | GLY | 245 | 44.512 | 43.276 | 38.127 | 1.00 | 0.00 | O |
| ATOM | 3851 | N    | ALA | 246 | 46.638 | 42.927 | 37.479 | 1.00 | 0.00 | N |
| ATOM | 3852 | H    | ALA | 246 | 47.458 | 43.348 | 37.047 | 1.00 | 0.00 | H |
| ATOM | 3853 | CA   | ALA | 246 | 46.746 | 41.541 | 37.925 | 1.00 | 0.00 | C |
| ATOM | 3854 | HA   | ALA | 246 | 45.885 | 41.298 | 38.549 | 1.00 | 0.00 | H |
| ATOM | 3855 | CB   | ALA | 246 | 46.703 | 40.615 | 36.702 | 1.00 | 0.00 | C |
| ATOM | 3856 | HB1  | ALA | 246 | 47.556 | 40.817 | 36.053 | 1.00 | 0.00 | H |
| ATOM | 3857 | HB2  | ALA | 246 | 45.783 | 40.782 | 36.141 | 1.00 | 0.00 | H |
| ATOM | 3858 | HB3  | ALA | 246 | 46.738 | 39.575 | 37.027 | 1.00 | 0.00 | H |
| ATOM | 3859 | C    | ALA | 246 | 48.010 | 41.329 | 38.774 | 1.00 | 0.00 | C |
| ATOM | 3860 | O    | ALA | 246 | 49.114 | 41.709 | 38.378 | 1.00 | 0.00 | O |
| ATOM | 3861 | N    | MET | 247 | 47.840 | 40.694 | 39.937 | 1.00 | 0.00 | N |
| ATOM | 3862 | H    | MET | 247 | 46.898 | 40.392 | 40.172 | 1.00 | 0.00 | H |
| ATOM | 3863 | CA   | MET | 247 | 48.917 | 40.232 | 40.815 | 1.00 | 0.00 | C |
| ATOM | 3864 | HA   | MET | 247 | 49.840 | 40.747 | 40.552 | 1.00 | 0.00 | H |
| ATOM | 3865 | CB   | MET | 247 | 48.568 | 40.581 | 42.271 | 1.00 | 0.00 | C |
| ATOM | 3866 | HB2  | MET | 247 | 48.428 | 41.658 | 42.347 | 1.00 | 0.00 | H |
| ATOM | 3867 | HB3  | MET | 247 | 47.624 | 40.106 | 42.529 | 1.00 | 0.00 | H |
| ATOM | 3868 | CG   | MET | 247 | 49.623 | 40.156 | 43.303 | 1.00 | 0.00 | C |
| ATOM | 3869 | HG2  | MET | 247 | 50.622 | 40.284 | 42.884 | 1.00 | 0.00 | H |
| ATOM | 3870 | HG3  | MET | 247 | 49.536 | 40.827 | 44.157 | 1.00 | 0.00 | H |
| ATOM | 3871 | SD   | MET | 247 | 49.434 | 38.459 | 43.924 | 1.00 | 0.00 | S |
| ATOM | 3872 | CE   | MET | 247 | 50.523 | 38.521 | 45.373 | 1.00 | 0.00 | C |
| ATOM | 3873 | HE1  | MET | 247 | 50.543 | 37.545 | 45.858 | 1.00 | 0.00 | H |
| ATOM | 3874 | HE2  | MET | 247 | 51.532 | 38.791 | 45.064 | 1.00 | 0.00 | H |
| ATOM | 3875 | HE3  | MET | 247 | 50.149 | 39.257 | 46.082 | 1.00 | 0.00 | H |
| ATOM | 3876 | C    | MET | 247 | 49.129 | 38.726 | 40.632 | 1.00 | 0.00 | C |
| ATOM | 3877 | O    | MET | 247 | 48.158 | 37.962 | 40.622 | 1.00 | 0.00 | O |
| ATOM | 3878 | N    | CYS | 248 | 50.380 | 38.276 | 40.533 | 1.00 | 0.00 | N |
| ATOM | 3879 | H    | CYS | 248 | 51.149 | 38.940 | 40.592 | 1.00 | 0.00 | H |
| ATOM | 3880 | CA   | CYS | 248 | 50.707 | 36.850 | 40.461 | 1.00 | 0.00 | C |
| ATOM | 3881 | HA   | CYS | 248 | 49.944 | 36.311 | 41.023 | 1.00 | 0.00 | H |
| ATOM | 3882 | CB   | CYS | 248 | 50.612 | 36.370 | 39.000 | 1.00 | 0.00 | C |
| ATOM | 3883 | HB2  | CYS | 248 | 50.170 | 35.379 | 38.991 | 1.00 | 0.00 | H |
| ATOM | 3884 | HB3  | CYS | 248 | 49.961 | 37.031 | 38.425 | 1.00 | 0.00 | H |
| ATOM | 3885 | SG   | CYS | 248 | 52.215 | 36.222 | 38.182 | 1.00 | 0.00 | S |
| ATOM | 3886 | HG   | CYS | 248 | 52.494 | 37.526 | 38.108 | 1.00 | 0.00 | H |
| ATOM | 3887 | C    | CYS | 248 | 52.032 | 36.501 | 41.156 | 1.00 | 0.00 | C |
| ATOM | 3888 | O    | CYS | 248 | 52.833 | 37.386 | 41.468 | 1.00 | 0.00 | O |
| ATOM | 3889 | N    | ILE | 249 | 52.239 | 35.208 | 41.420 | 1.00 | 0.00 | N |
| ATOM | 3890 | H    | ILE | 249 | 51.539 | 34.540 | 41.113 | 1.00 | 0.00 | H |
| ATOM | 3891 | CA   | ILE | 249 | 53.373 | 34.686 | 42.191 | 1.00 | 0.00 | C |
| ATOM | 3892 | HA   | ILE | 249 | 54.138 | 35.460 | 42.211 | 1.00 | 0.00 | H |
| ATOM | 3893 | CB   | ILE | 249 | 52.968 | 34.412 | 43.665 | 1.00 | 0.00 | C |
| ATOM | 3894 | HB   | ILE | 249 | 53.895 | 34.254 | 44.220 | 1.00 | 0.00 | H |
| ATOM | 3895 | CG2  | ILE | 249 | 52.266 | 35.634 | 44.289 | 1.00 | 0.00 | C |
| ATOM | 3896 | HG21 | ILE | 249 | 52.791 | 36.546 | 44.007 | 1.00 | 0.00 | H |
| ATOM | 3897 | HG22 | ILE | 249 | 52.272 | 35.556 | 45.375 | 1.00 | 0.00 | H |

|      |      |      |     |     |        |        |        |      |      |   |
|------|------|------|-----|-----|--------|--------|--------|------|------|---|
| ATOM | 3898 | HG23 | ILE | 249 | 51.236 | 35.701 | 43.938 | 1.00 | 0.00 | H |
| ATOM | 3899 | CG1  | ILE | 249 | 52.106 | 33.137 | 43.833 | 1.00 | 0.00 | C |
| ATOM | 3900 | HG12 | ILE | 249 | 51.194 | 33.235 | 43.244 | 1.00 | 0.00 | H |
| ATOM | 3901 | HG13 | ILE | 249 | 52.660 | 32.277 | 43.459 | 1.00 | 0.00 | H |
| ATOM | 3902 | CD1  | ILE | 249 | 51.721 | 32.822 | 45.286 | 1.00 | 0.00 | C |
| ATOM | 3903 | HD11 | ILE | 249 | 52.616 | 32.791 | 45.909 | 1.00 | 0.00 | H |
| ATOM | 3904 | HD12 | ILE | 249 | 51.228 | 31.851 | 45.324 | 1.00 | 0.00 | H |
| ATOM | 3905 | HD13 | ILE | 249 | 51.033 | 33.575 | 45.670 | 1.00 | 0.00 | H |
| ATOM | 3906 | C    | ILE | 249 | 54.016 | 33.451 | 41.538 | 1.00 | 0.00 | C |
| ATOM | 3907 | O    | ILE | 249 | 53.340 | 32.643 | 40.899 | 1.00 | 0.00 | O |
| ATOM | 3908 | N    | TRP | 250 | 55.311 | 33.276 | 41.800 | 1.00 | 0.00 | N |
| ATOM | 3909 | H    | TRP | 250 | 55.768 | 34.022 | 42.317 | 1.00 | 0.00 | H |
| ATOM | 3910 | CA   | TRP | 250 | 56.065 | 32.021 | 41.700 | 1.00 | 0.00 | C |
| ATOM | 3911 | HA   | TRP | 250 | 55.380 | 31.189 | 41.531 | 1.00 | 0.00 | H |
| ATOM | 3912 | CB   | TRP | 250 | 57.091 | 32.061 | 40.549 | 1.00 | 0.00 | C |
| ATOM | 3913 | HB2  | TRP | 250 | 57.788 | 32.875 | 40.733 | 1.00 | 0.00 | H |
| ATOM | 3914 | HB3  | TRP | 250 | 57.670 | 31.144 | 40.600 | 1.00 | 0.00 | H |
| ATOM | 3915 | CG   | TRP | 250 | 56.618 | 32.182 | 39.133 | 1.00 | 0.00 | C |
| ATOM | 3916 | CD1  | TRP | 250 | 56.619 | 31.175 | 38.229 | 1.00 | 0.00 | C |
| ATOM | 3917 | HD1  | TRP | 250 | 56.914 | 30.153 | 38.432 | 1.00 | 0.00 | H |
| ATOM | 3918 | NE1  | TRP | 250 | 56.178 | 31.641 | 37.009 | 1.00 | 0.00 | N |
| ATOM | 3919 | HE1  | TRP | 250 | 56.065 | 31.051 | 36.186 | 1.00 | 0.00 | H |
| ATOM | 3920 | CE2  | TRP | 250 | 55.823 | 32.965 | 37.073 | 1.00 | 0.00 | C |
| ATOM | 3921 | CZ2  | TRP | 250 | 55.280 | 33.846 | 36.131 | 1.00 | 0.00 | C |
| ATOM | 3922 | HZ2  | TRP | 250 | 55.023 | 33.497 | 35.141 | 1.00 | 0.00 | H |
| ATOM | 3923 | CH2  | TRP | 250 | 55.065 | 35.183 | 36.495 | 1.00 | 0.00 | C |
| ATOM | 3924 | HH2  | TRP | 250 | 54.634 | 35.873 | 35.778 | 1.00 | 0.00 | H |
| ATOM | 3925 | CZ3  | TRP | 250 | 55.384 | 35.610 | 37.796 | 1.00 | 0.00 | C |
| ATOM | 3926 | HZ3  | TRP | 250 | 55.186 | 36.631 | 38.079 | 1.00 | 0.00 | H |
| ATOM | 3927 | CE3  | TRP | 250 | 55.900 | 34.709 | 38.747 | 1.00 | 0.00 | C |
| ATOM | 3928 | HE3  | TRP | 250 | 56.109 | 35.046 | 39.752 | 1.00 | 0.00 | H |
| ATOM | 3929 | CD2  | TRP | 250 | 56.125 | 33.356 | 38.413 | 1.00 | 0.00 | C |
| ATOM | 3930 | C    | TRP | 250 | 56.820 | 31.779 | 43.022 | 1.00 | 0.00 | C |
| ATOM | 3931 | O    | TRP | 250 | 56.965 | 32.687 | 43.840 | 1.00 | 0.00 | O |
| ATOM | 3932 | N    | GLU | 251 | 57.400 | 30.593 | 43.214 | 1.00 | 0.00 | N |
| ATOM | 3933 | H    | GLU | 251 | 57.246 | 29.868 | 42.532 | 1.00 | 0.00 | H |
| ATOM | 3934 | CA   | GLU | 251 | 58.481 | 30.396 | 44.198 | 1.00 | 0.00 | C |
| ATOM | 3935 | HA   | GLU | 251 | 58.107 | 30.605 | 45.204 | 1.00 | 0.00 | H |
| ATOM | 3936 | CB   | GLU | 251 | 58.968 | 28.936 | 44.137 | 1.00 | 0.00 | C |
| ATOM | 3937 | HB2  | GLU | 251 | 59.162 | 28.688 | 43.091 | 1.00 | 0.00 | H |
| ATOM | 3938 | HB3  | GLU | 251 | 59.920 | 28.845 | 44.661 | 1.00 | 0.00 | H |
| ATOM | 3939 | CG   | GLU | 251 | 57.963 | 27.910 | 44.698 | 1.00 | 0.00 | C |
| ATOM | 3940 | HG2  | GLU | 251 | 56.951 | 28.175 | 44.383 | 1.00 | 0.00 | H |
| ATOM | 3941 | HG3  | GLU | 251 | 58.194 | 26.940 | 44.252 | 1.00 | 0.00 | H |
| ATOM | 3942 | CD   | GLU | 251 | 58.029 | 27.750 | 46.226 | 1.00 | 0.00 | C |
| ATOM | 3943 | OE1  | GLU | 251 | 59.162 | 27.672 | 46.758 | 1.00 | 0.00 | O |
| ATOM | 3944 | OE2  | GLU | 251 | 56.954 | 27.654 | 46.864 | 1.00 | 0.00 | O |
| ATOM | 3945 | C    | GLU | 251 | 59.668 | 31.346 | 43.916 | 1.00 | 0.00 | C |
| ATOM | 3946 | O    | GLU | 251 | 59.924 | 31.704 | 42.761 | 1.00 | 0.00 | O |
| ATOM | 3947 | N    | ALA | 252 | 60.454 | 31.727 | 44.932 | 1.00 | 0.00 | N |
| ATOM | 3948 | H    | ALA | 252 | 60.203 | 31.482 | 45.887 | 1.00 | 0.00 | H |
| ATOM | 3949 | CA   | ALA | 252 | 61.700 | 32.484 | 44.706 | 1.00 | 0.00 | C |

|      |      |      |     |     |        |        |        |      |      |   |
|------|------|------|-----|-----|--------|--------|--------|------|------|---|
| ATOM | 3950 | HA   | ALA | 252 | 61.468 | 33.395 | 44.152 | 1.00 | 0.00 | H |
| ATOM | 3951 | CB   | ALA | 252 | 62.306 | 32.895 | 46.048 | 1.00 | 0.00 | C |
| ATOM | 3952 | HB1  | ALA | 252 | 61.653 | 33.615 | 46.536 | 1.00 | 0.00 | H |
| ATOM | 3953 | HB2  | ALA | 252 | 63.272 | 33.374 | 45.880 | 1.00 | 0.00 | H |
| ATOM | 3954 | HB3  | ALA | 252 | 62.448 | 32.020 | 46.683 | 1.00 | 0.00 | H |
| ATOM | 3955 | C    | ALA | 252 | 62.721 | 31.692 | 43.865 | 1.00 | 0.00 | C |
| ATOM | 3956 | O    | ALA | 252 | 63.521 | 32.269 | 43.136 | 1.00 | 0.00 | O |
| ATOM | 3957 | N    | SER | 253 | 62.640 | 30.359 | 43.884 | 1.00 | 0.00 | N |
| ATOM | 3958 | H    | SER | 253 | 62.003 | 29.934 | 44.542 | 1.00 | 0.00 | H |
| ATOM | 3959 | CA   | SER | 253 | 63.419 | 29.460 | 43.022 | 1.00 | 0.00 | C |
| ATOM | 3960 | HA   | SER | 253 | 64.480 | 29.653 | 43.183 | 1.00 | 0.00 | H |
| ATOM | 3961 | CB   | SER | 253 | 63.112 | 28.006 | 43.416 | 1.00 | 0.00 | C |
| ATOM | 3962 | HB2  | SER | 253 | 62.118 | 27.741 | 43.052 | 1.00 | 0.00 | H |
| ATOM | 3963 | HB3  | SER | 253 | 63.840 | 27.340 | 42.951 | 1.00 | 0.00 | H |
| ATOM | 3964 | OG   | SER | 253 | 63.133 | 27.834 | 44.828 | 1.00 | 0.00 | O |
| ATOM | 3965 | HG   | SER | 253 | 64.041 | 27.959 | 45.134 | 1.00 | 0.00 | H |
| ATOM | 3966 | C    | SER | 253 | 63.135 | 29.636 | 41.516 | 1.00 | 0.00 | C |
| ATOM | 3967 | O    | SER | 253 | 63.860 | 29.084 | 40.692 | 1.00 | 0.00 | O |
| ATOM | 3968 | N    | HID | 254 | 62.076 | 30.368 | 41.146 | 1.00 | 0.00 | N |
| ATOM | 3969 | H    | HID | 254 | 61.541 | 30.821 | 41.878 | 1.00 | 0.00 | H |
| ATOM | 3970 | CA   | HID | 254 | 61.527 | 30.473 | 39.789 | 1.00 | 0.00 | C |
| ATOM | 3971 | HA   | HID | 254 | 62.172 | 29.917 | 39.112 | 1.00 | 0.00 | H |
| ATOM | 3972 | CB   | HID | 254 | 60.139 | 29.795 | 39.763 | 1.00 | 0.00 | C |
| ATOM | 3973 | HB2  | HID | 254 | 59.601 | 30.067 | 40.669 | 1.00 | 0.00 | H |
| ATOM | 3974 | HB3  | HID | 254 | 59.562 | 30.169 | 38.921 | 1.00 | 0.00 | H |
| ATOM | 3975 | CG   | HID | 254 | 60.143 | 28.284 | 39.652 | 1.00 | 0.00 | C |
| ATOM | 3976 | ND1  | HID | 254 | 59.022 | 27.482 | 39.603 | 1.00 | 0.00 | N |
| ATOM | 3977 | HD1  | HID | 254 | 58.060 | 27.789 | 39.648 | 1.00 | 0.00 | H |
| ATOM | 3978 | CE1  | HID | 254 | 59.413 | 26.218 | 39.369 | 1.00 | 0.00 | C |
| ATOM | 3979 | HE1  | HID | 254 | 58.745 | 25.371 | 39.263 | 1.00 | 0.00 | H |
| ATOM | 3980 | NE2  | HID | 254 | 60.750 | 26.159 | 39.240 | 1.00 | 0.00 | N |
| ATOM | 3981 | CD2  | HID | 254 | 61.219 | 27.463 | 39.426 | 1.00 | 0.00 | C |
| ATOM | 3982 | HD2  | HID | 254 | 62.251 | 27.771 | 39.337 | 1.00 | 0.00 | H |
| ATOM | 3983 | C    | HID | 254 | 61.560 | 31.905 | 39.207 | 1.00 | 0.00 | C |
| ATOM | 3984 | O    | HID | 254 | 60.784 | 32.237 | 38.310 | 1.00 | 0.00 | O |
| ATOM | 3985 | N    | VAL | 255 | 62.520 | 32.740 | 39.630 | 1.00 | 0.00 | N |
| ATOM | 3986 | H    | VAL | 255 | 63.077 | 32.464 | 40.429 | 1.00 | 0.00 | H |
| ATOM | 3987 | CA   | VAL | 255 | 62.779 | 34.065 | 39.021 | 1.00 | 0.00 | C |
| ATOM | 3988 | HA   | VAL | 255 | 61.898 | 34.689 | 39.172 | 1.00 | 0.00 | H |
| ATOM | 3989 | CB   | VAL | 255 | 63.968 | 34.754 | 39.727 | 1.00 | 0.00 | C |
| ATOM | 3990 | HB   | VAL | 255 | 64.800 | 34.051 | 39.778 | 1.00 | 0.00 | H |
| ATOM | 3991 | CG1  | VAL | 255 | 64.457 | 36.017 | 39.016 | 1.00 | 0.00 | C |
| ATOM | 3992 | HG11 | VAL | 255 | 63.648 | 36.742 | 38.924 | 1.00 | 0.00 | H |
| ATOM | 3993 | HG12 | VAL | 255 | 65.275 | 36.457 | 39.586 | 1.00 | 0.00 | H |
| ATOM | 3994 | HG13 | VAL | 255 | 64.838 | 35.779 | 38.026 | 1.00 | 0.00 | H |
| ATOM | 3995 | CG2  | VAL | 255 | 63.586 | 35.180 | 41.149 | 1.00 | 0.00 | C |
| ATOM | 3996 | HG21 | VAL | 255 | 62.791 | 35.924 | 41.120 | 1.00 | 0.00 | H |
| ATOM | 3997 | HG22 | VAL | 255 | 64.453 | 35.601 | 41.657 | 1.00 | 0.00 | H |
| ATOM | 3998 | HG23 | VAL | 255 | 63.238 | 34.323 | 41.720 | 1.00 | 0.00 | H |
| ATOM | 3999 | C    | VAL | 255 | 62.996 | 33.975 | 37.498 | 1.00 | 0.00 | C |
| ATOM | 4000 | O    | VAL | 255 | 62.468 | 34.804 | 36.757 | 1.00 | 0.00 | O |
| ATOM | 4001 | N    | ARG | 256 | 63.685 | 32.928 | 37.004 | 1.00 | 0.00 | N |



|      |      |      |     |     |        |        |        |      |      |   |
|------|------|------|-----|-----|--------|--------|--------|------|------|---|
| ATOM | 4002 | H    | ARG | 256 | 64.085 | 32.283 | 37.668 | 1.00 | 0.00 | H |
| ATOM | 4003 | CA   | ARG | 256 | 63.839 | 32.667 | 35.554 | 1.00 | 0.00 | C |
| ATOM | 4004 | HA   | ARG | 256 | 64.249 | 33.567 | 35.094 | 1.00 | 0.00 | H |
| ATOM | 4005 | CB   | ARG | 256 | 64.833 | 31.509 | 35.284 | 1.00 | 0.00 | C |
| ATOM | 4006 | HB2  | ARG | 256 | 65.027 | 31.483 | 34.211 | 1.00 | 0.00 | H |
| ATOM | 4007 | HB3  | ARG | 256 | 65.774 | 31.737 | 35.785 | 1.00 | 0.00 | H |
| ATOM | 4008 | CG   | ARG | 256 | 64.380 | 30.102 | 35.721 | 1.00 | 0.00 | C |
| ATOM | 4009 | HG2  | ARG | 256 | 64.144 | 30.118 | 36.786 | 1.00 | 0.00 | H |
| ATOM | 4010 | HG3  | ARG | 256 | 63.490 | 29.826 | 35.159 | 1.00 | 0.00 | H |
| ATOM | 4011 | CD   | ARG | 256 | 65.447 | 29.023 | 35.462 | 1.00 | 0.00 | C |
| ATOM | 4012 | HD2  | ARG | 256 | 65.613 | 28.938 | 34.386 | 1.00 | 0.00 | H |
| ATOM | 4013 | HD3  | ARG | 256 | 66.382 | 29.327 | 35.937 | 1.00 | 0.00 | H |
| ATOM | 4014 | NE   | ARG | 256 | 65.035 | 27.712 | 36.007 | 1.00 | 0.00 | N |
| ATOM | 4015 | HE   | ARG | 256 | 64.147 | 27.670 | 36.483 | 1.00 | 0.00 | H |
| ATOM | 4016 | CZ   | ARG | 256 | 65.752 | 26.596 | 36.012 | 1.00 | 0.00 | C |
| ATOM | 4017 | NH1  | ARG | 256 | 66.885 | 26.478 | 35.379 | 1.00 | 0.00 | N |
| ATOM | 4018 | HH11 | ARG | 256 | 67.201 | 27.182 | 34.724 | 1.00 | 0.00 | H |
| ATOM | 4019 | HH12 | ARG | 256 | 67.389 | 25.602 | 35.379 | 1.00 | 0.00 | H |
| ATOM | 4020 | NH2  | ARG | 256 | 65.340 | 25.545 | 36.660 | 1.00 | 0.00 | N |
| ATOM | 4021 | HH21 | ARG | 256 | 64.439 | 25.516 | 37.128 | 1.00 | 0.00 | H |
| ATOM | 4022 | HH22 | ARG | 256 | 65.942 | 24.731 | 36.717 | 1.00 | 0.00 | H |
| ATOM | 4023 | C    | ARG | 256 | 62.495 | 32.467 | 34.845 | 1.00 | 0.00 | C |
| ATOM | 4024 | O    | ARG | 256 | 62.280 | 33.011 | 33.768 | 1.00 | 0.00 | O |
| ATOM | 4025 | N    | ASN | 257 | 61.577 | 31.735 | 35.472 | 1.00 | 0.00 | N |
| ATOM | 4026 | H    | ASN | 257 | 61.820 | 31.325 | 36.362 | 1.00 | 0.00 | H |
| ATOM | 4027 | CA   | ASN | 257 | 60.236 | 31.462 | 34.964 | 1.00 | 0.00 | C |
| ATOM | 4028 | HA   | ASN | 257 | 60.318 | 31.071 | 33.948 | 1.00 | 0.00 | H |
| ATOM | 4029 | CB   | ASN | 257 | 59.528 | 30.402 | 35.849 | 1.00 | 0.00 | C |
| ATOM | 4030 | HB2  | ASN | 257 | 59.143 | 30.886 | 36.744 | 1.00 | 0.00 | H |
| ATOM | 4031 | HB3  | ASN | 257 | 58.665 | 30.038 | 35.295 | 1.00 | 0.00 | H |
| ATOM | 4032 | CG   | ASN | 257 | 60.352 | 29.198 | 36.313 | 1.00 | 0.00 | C |
| ATOM | 4033 | OD1  | ASN | 257 | 61.513 | 29.280 | 36.691 | 1.00 | 0.00 | O |
| ATOM | 4034 | ND2  | ASN | 257 | 59.767 | 28.028 | 36.374 | 1.00 | 0.00 | N |
| ATOM | 4035 | HD21 | ASN | 257 | 58.772 | 27.934 | 36.200 | 1.00 | 0.00 | H |
| ATOM | 4036 | HD22 | ASN | 257 | 60.279 | 27.281 | 36.808 | 1.00 | 0.00 | H |
| ATOM | 4037 | C    | ASN | 257 | 59.423 | 32.769 | 34.897 | 1.00 | 0.00 | C |
| ATOM | 4038 | O    | ASN | 257 | 58.788 | 33.049 | 33.884 | 1.00 | 0.00 | O |
| ATOM | 4039 | N    | SER | 258 | 59.512 | 33.596 | 35.945 | 1.00 | 0.00 | N |
| ATOM | 4040 | H    | SER | 258 | 60.047 | 33.277 | 36.746 | 1.00 | 0.00 | H |
| ATOM | 4041 | CA   | SER | 258 | 58.823 | 34.887 | 36.048 | 1.00 | 0.00 | C |
| ATOM | 4042 | HA   | SER | 258 | 57.761 | 34.722 | 35.884 | 1.00 | 0.00 | H |
| ATOM | 4043 | CB   | SER | 258 | 59.013 | 35.429 | 37.466 | 1.00 | 0.00 | C |
| ATOM | 4044 | HB2  | SER | 258 | 58.730 | 34.665 | 38.191 | 1.00 | 0.00 | H |
| ATOM | 4045 | HB3  | SER | 258 | 60.062 | 35.685 | 37.620 | 1.00 | 0.00 | H |
| ATOM | 4046 | OG   | SER | 258 | 58.222 | 36.577 | 37.669 | 1.00 | 0.00 | O |
| ATOM | 4047 | HG   | SER | 258 | 57.297 | 36.293 | 37.636 | 1.00 | 0.00 | H |
| ATOM | 4048 | C    | SER | 258 | 59.289 | 35.914 | 35.008 | 1.00 | 0.00 | C |
| ATOM | 4049 | O    | SER | 258 | 58.467 | 36.518 | 34.319 | 1.00 | 0.00 | O |
| ATOM | 4050 | N    | ILE | 259 | 60.605 | 36.076 | 34.827 | 1.00 | 0.00 | N |
| ATOM | 4051 | H    | ILE | 259 | 61.243 | 35.566 | 35.430 | 1.00 | 0.00 | H |
| ATOM | 4052 | CA   | ILE | 259 | 61.167 | 37.011 | 33.838 | 1.00 | 0.00 | C |
| ATOM | 4053 | HA   | ILE | 259 | 60.639 | 37.962 | 33.932 | 1.00 | 0.00 | H |

|      |      |      |     |     |        |        |        |      |      |   |
|------|------|------|-----|-----|--------|--------|--------|------|------|---|
| ATOM | 4054 | CB   | ILE | 259 | 62.659 | 37.277 | 34.150 | 1.00 | 0.00 | C |
| ATOM | 4055 | HB   | ILE | 259 | 63.155 | 36.322 | 34.337 | 1.00 | 0.00 | H |
| ATOM | 4056 | CG2  | ILE | 259 | 63.383 | 37.968 | 32.980 | 1.00 | 0.00 | C |
| ATOM | 4057 | HG21 | ILE | 259 | 63.387 | 37.326 | 32.098 | 1.00 | 0.00 | H |
| ATOM | 4058 | HG22 | ILE | 259 | 64.421 | 38.162 | 33.238 | 1.00 | 0.00 | H |
| ATOM | 4059 | HG23 | ILE | 259 | 62.889 | 38.909 | 32.735 | 1.00 | 0.00 | H |
| ATOM | 4060 | CG1  | ILE | 259 | 62.733 | 38.147 | 35.429 | 1.00 | 0.00 | C |
| ATOM | 4061 | HG12 | ILE | 259 | 62.294 | 39.124 | 35.225 | 1.00 | 0.00 | H |
| ATOM | 4062 | HG13 | ILE | 259 | 62.147 | 37.677 | 36.220 | 1.00 | 0.00 | H |
| ATOM | 4063 | CD1  | ILE | 259 | 64.144 | 38.354 | 35.984 | 1.00 | 0.00 | C |
| ATOM | 4064 | HD11 | ILE | 259 | 64.618 | 37.389 | 36.156 | 1.00 | 0.00 | H |
| ATOM | 4065 | HD12 | ILE | 259 | 64.074 | 38.886 | 36.931 | 1.00 | 0.00 | H |
| ATOM | 4066 | HD13 | ILE | 259 | 64.748 | 38.950 | 35.301 | 1.00 | 0.00 | H |
| ATOM | 4067 | C    | ILE | 259 | 60.909 | 36.535 | 32.400 | 1.00 | 0.00 | C |
| ATOM | 4068 | O    | ILE | 259 | 60.531 | 37.348 | 31.553 | 1.00 | 0.00 | O |
| ATOM | 4069 | N    | ASN | 260 | 61.013 | 35.228 | 32.124 | 1.00 | 0.00 | N |
| ATOM | 4070 | H    | ASN | 260 | 61.380 | 34.596 | 32.826 | 1.00 | 0.00 | H |
| ATOM | 4071 | CA   | ASN | 260 | 60.579 | 34.671 | 30.839 | 1.00 | 0.00 | C |
| ATOM | 4072 | HA   | ASN | 260 | 61.131 | 35.164 | 30.035 | 1.00 | 0.00 | H |
| ATOM | 4073 | CB   | ASN | 260 | 60.866 | 33.158 | 30.781 | 1.00 | 0.00 | C |
| ATOM | 4074 | HB2  | ASN | 260 | 60.529 | 32.678 | 31.698 | 1.00 | 0.00 | H |
| ATOM | 4075 | HB3  | ASN | 260 | 60.293 | 32.736 | 29.955 | 1.00 | 0.00 | H |
| ATOM | 4076 | CG   | ASN | 260 | 62.325 | 32.797 | 30.542 | 1.00 | 0.00 | C |
| ATOM | 4077 | OD1  | ASN | 260 | 63.243 | 33.593 | 30.641 | 1.00 | 0.00 | O |
| ATOM | 4078 | ND2  | ASN | 260 | 62.588 | 31.567 | 30.163 | 1.00 | 0.00 | N |
| ATOM | 4079 | HD21 | ASN | 260 | 61.849 | 30.902 | 30.026 | 1.00 | 0.00 | H |
| ATOM | 4080 | HD22 | ASN | 260 | 63.547 | 31.364 | 29.953 | 1.00 | 0.00 | H |
| ATOM | 4081 | C    | ASN | 260 | 59.087 | 34.952 | 30.595 | 1.00 | 0.00 | C |
| ATOM | 4082 | O    | ASN | 260 | 58.719 | 35.366 | 29.497 | 1.00 | 0.00 | O |
| ATOM | 4083 | N    | SER | 261 | 58.241 | 34.788 | 31.618 | 1.00 | 0.00 | N |
| ATOM | 4084 | H    | SER | 261 | 58.599 | 34.416 | 32.490 | 1.00 | 0.00 | H |
| ATOM | 4085 | CA   | SER | 261 | 56.802 | 35.043 | 31.525 | 1.00 | 0.00 | C |
| ATOM | 4086 | HA   | SER | 261 | 56.425 | 34.457 | 30.692 | 1.00 | 0.00 | H |
| ATOM | 4087 | CB   | SER | 261 | 56.105 | 34.580 | 32.806 | 1.00 | 0.00 | C |
| ATOM | 4088 | HB2  | SER | 261 | 56.393 | 33.552 | 33.023 | 1.00 | 0.00 | H |
| ATOM | 4089 | HB3  | SER | 261 | 56.405 | 35.212 | 33.641 | 1.00 | 0.00 | H |
| ATOM | 4090 | OG   | SER | 261 | 54.704 | 34.640 | 32.659 | 1.00 | 0.00 | O |
| ATOM | 4091 | HG   | SER | 261 | 54.468 | 34.016 | 31.946 | 1.00 | 0.00 | H |
| ATOM | 4092 | C    | SER | 261 | 56.470 | 36.504 | 31.218 | 1.00 | 0.00 | C |
| ATOM | 4093 | O    | SER | 261 | 55.655 | 36.768 | 30.338 | 1.00 | 0.00 | O |
| ATOM | 4094 | N    | ALA | 262 | 57.171 | 37.459 | 31.836 | 1.00 | 0.00 | N |
| ATOM | 4095 | H    | ALA | 262 | 57.807 | 37.184 | 32.577 | 1.00 | 0.00 | H |
| ATOM | 4096 | CA   | ALA | 262 | 57.046 | 38.883 | 31.518 | 1.00 | 0.00 | C |
| ATOM | 4097 | HA   | ALA | 262 | 56.021 | 39.198 | 31.715 | 1.00 | 0.00 | H |
| ATOM | 4098 | CB   | ALA | 262 | 57.990 | 39.656 | 32.446 | 1.00 | 0.00 | C |
| ATOM | 4099 | HB1  | ALA | 262 | 59.029 | 39.445 | 32.197 | 1.00 | 0.00 | H |
| ATOM | 4100 | HB2  | ALA | 262 | 57.809 | 39.355 | 33.476 | 1.00 | 0.00 | H |
| ATOM | 4101 | HB3  | ALA | 262 | 57.808 | 40.727 | 32.343 | 1.00 | 0.00 | H |
| ATOM | 4102 | C    | ALA | 262 | 57.354 | 39.184 | 30.039 | 1.00 | 0.00 | C |
| ATOM | 4103 | O    | ALA | 262 | 56.596 | 39.886 | 29.365 | 1.00 | 0.00 | O |
| ATOM | 4104 | N    | CYS | 263 | 58.439 | 38.607 | 29.511 | 1.00 | 0.00 | N |
| ATOM | 4105 | H    | CYS | 263 | 59.021 | 38.040 | 30.116 | 1.00 | 0.00 | H |

|      |      |      |     |     |        |        |        |      |      |   |
|------|------|------|-----|-----|--------|--------|--------|------|------|---|
| ATOM | 4106 | CA   | CYS | 263 | 58.829 | 38.759 | 28.107 | 1.00 | 0.00 | C |
| ATOM | 4107 | HA   | CYS | 263 | 58.867 | 39.822 | 27.864 | 1.00 | 0.00 | H |
| ATOM | 4108 | CB   | CYS | 263 | 60.232 | 38.164 | 27.902 | 1.00 | 0.00 | C |
| ATOM | 4109 | HB2  | CYS | 263 | 60.224 | 37.097 | 28.129 | 1.00 | 0.00 | H |
| ATOM | 4110 | HB3  | CYS | 263 | 60.524 | 38.298 | 26.859 | 1.00 | 0.00 | H |
| ATOM | 4111 | SG   | CYS | 263 | 61.451 | 39.000 | 28.962 | 1.00 | 0.00 | S |
| ATOM | 4112 | HG   | CYS | 263 | 61.091 | 38.423 | 30.121 | 1.00 | 0.00 | H |
| ATOM | 4113 | C    | CYS | 263 | 57.809 | 38.111 | 27.154 | 1.00 | 0.00 | C |
| ATOM | 4114 | O    | CYS | 263 | 57.434 | 38.708 | 26.144 | 1.00 | 0.00 | O |
| ATOM | 4115 | N    | LEU | 264 | 57.327 | 36.908 | 27.482 | 1.00 | 0.00 | N |
| ATOM | 4116 | H    | LEU | 264 | 57.678 | 36.466 | 28.327 | 1.00 | 0.00 | H |
| ATOM | 4117 | CA   | LEU | 264 | 56.320 | 36.189 | 26.697 | 1.00 | 0.00 | C |
| ATOM | 4118 | HA   | LEU | 264 | 56.635 | 36.177 | 25.654 | 1.00 | 0.00 | H |
| ATOM | 4119 | CB   | LEU | 264 | 56.218 | 34.738 | 27.204 | 1.00 | 0.00 | C |
| ATOM | 4120 | HB2  | LEU | 264 | 56.083 | 34.766 | 28.285 | 1.00 | 0.00 | H |
| ATOM | 4121 | HB3  | LEU | 264 | 55.333 | 34.270 | 26.769 | 1.00 | 0.00 | H |
| ATOM | 4122 | CG   | LEU | 264 | 57.446 | 33.866 | 26.871 | 1.00 | 0.00 | C |
| ATOM | 4123 | HG   | LEU | 264 | 58.361 | 34.398 | 27.123 | 1.00 | 0.00 | H |
| ATOM | 4124 | CD1  | LEU | 264 | 57.406 | 32.570 | 27.680 | 1.00 | 0.00 | C |
| ATOM | 4125 | HD11 | LEU | 264 | 57.384 | 32.803 | 28.745 | 1.00 | 0.00 | H |
| ATOM | 4126 | HD12 | LEU | 264 | 58.293 | 31.973 | 27.469 | 1.00 | 0.00 | H |
| ATOM | 4127 | HD13 | LEU | 264 | 56.515 | 31.995 | 27.426 | 1.00 | 0.00 | H |
| ATOM | 4128 | CD2  | LEU | 264 | 57.501 | 33.499 | 25.385 | 1.00 | 0.00 | C |
| ATOM | 4129 | HD21 | LEU | 264 | 56.591 | 32.973 | 25.096 | 1.00 | 0.00 | H |
| ATOM | 4130 | HD22 | LEU | 264 | 57.608 | 34.396 | 24.778 | 1.00 | 0.00 | H |
| ATOM | 4131 | HD23 | LEU | 264 | 58.360 | 32.853 | 25.200 | 1.00 | 0.00 | H |
| ATOM | 4132 | C    | LEU | 264 | 54.954 | 36.889 | 26.723 | 1.00 | 0.00 | C |
| ATOM | 4133 | O    | LEU | 264 | 54.307 | 36.970 | 25.683 | 1.00 | 0.00 | O |
| ATOM | 4134 | N    | ALA | 265 | 54.538 | 37.456 | 27.859 | 1.00 | 0.00 | N |
| ATOM | 4135 | H    | ALA | 265 | 55.090 | 37.317 | 28.699 | 1.00 | 0.00 | H |
| ATOM | 4136 | CA   | ALA | 265 | 53.330 | 38.270 | 27.966 | 1.00 | 0.00 | C |
| ATOM | 4137 | HA   | ALA | 265 | 52.482 | 37.686 | 27.602 | 1.00 | 0.00 | H |
| ATOM | 4138 | CB   | ALA | 265 | 53.087 | 38.605 | 29.443 | 1.00 | 0.00 | C |
| ATOM | 4139 | HB1  | ALA | 265 | 52.977 | 37.683 | 30.017 | 1.00 | 0.00 | H |
| ATOM | 4140 | HB2  | ALA | 265 | 52.174 | 39.193 | 29.541 | 1.00 | 0.00 | H |
| ATOM | 4141 | HB3  | ALA | 265 | 53.926 | 39.175 | 29.845 | 1.00 | 0.00 | H |
| ATOM | 4142 | C    | ALA | 265 | 53.429 | 39.536 | 27.100 | 1.00 | 0.00 | C |
| ATOM | 4143 | O    | ALA | 265 | 52.503 | 39.834 | 26.347 | 1.00 | 0.00 | O |
| ATOM | 4144 | N    | ALA | 266 | 54.566 | 40.242 | 27.129 | 1.00 | 0.00 | N |
| ATOM | 4145 | H    | ALA | 266 | 55.291 | 39.972 | 27.788 | 1.00 | 0.00 | H |
| ATOM | 4146 | CA   | ALA | 266 | 54.812 | 41.391 | 26.257 | 1.00 | 0.00 | C |
| ATOM | 4147 | HA   | ALA | 266 | 54.017 | 42.121 | 26.418 | 1.00 | 0.00 | H |
| ATOM | 4148 | CB   | ALA | 266 | 56.143 | 42.035 | 26.665 | 1.00 | 0.00 | C |
| ATOM | 4149 | HB1  | ALA | 266 | 56.322 | 42.922 | 26.057 | 1.00 | 0.00 | H |
| ATOM | 4150 | HB2  | ALA | 266 | 56.963 | 41.331 | 26.519 | 1.00 | 0.00 | H |
| ATOM | 4151 | HB3  | ALA | 266 | 56.107 | 42.325 | 27.716 | 1.00 | 0.00 | H |
| ATOM | 4152 | C    | ALA | 266 | 54.788 | 41.010 | 24.761 | 1.00 | 0.00 | C |
| ATOM | 4153 | O    | ALA | 266 | 54.166 | 41.709 | 23.960 | 1.00 | 0.00 | O |
| ATOM | 4154 | N    | PHE | 267 | 55.401 | 39.884 | 24.379 | 1.00 | 0.00 | N |
| ATOM | 4155 | H    | PHE | 267 | 55.938 | 39.370 | 25.073 | 1.00 | 0.00 | H |
| ATOM | 4156 | CA   | PHE | 267 | 55.388 | 39.375 | 23.001 | 1.00 | 0.00 | C |
| ATOM | 4157 | HA   | PHE | 267 | 55.709 | 40.176 | 22.333 | 1.00 | 0.00 | H |

|      |      |      |     |     |        |        |        |      |      |   |
|------|------|------|-----|-----|--------|--------|--------|------|------|---|
| ATOM | 4158 | CB   | PHE | 267 | 56.403 | 38.225 | 22.888 | 1.00 | 0.00 | C |
| ATOM | 4159 | HB2  | PHE | 267 | 57.354 | 38.557 | 23.307 | 1.00 | 0.00 | H |
| ATOM | 4160 | HB3  | PHE | 267 | 56.061 | 37.382 | 23.489 | 1.00 | 0.00 | H |
| ATOM | 4161 | CG   | PHE | 267 | 56.650 | 37.751 | 21.466 | 1.00 | 0.00 | C |
| ATOM | 4162 | CD1  | PHE | 267 | 57.708 | 38.301 | 20.716 | 1.00 | 0.00 | C |
| ATOM | 4163 | HD1  | PHE | 267 | 58.353 | 39.051 | 21.156 | 1.00 | 0.00 | H |
| ATOM | 4164 | CE1  | PHE | 267 | 57.928 | 37.886 | 19.390 | 1.00 | 0.00 | C |
| ATOM | 4165 | HE1  | PHE | 267 | 58.739 | 38.317 | 18.819 | 1.00 | 0.00 | H |
| ATOM | 4166 | CZ   | PHE | 267 | 57.087 | 36.922 | 18.806 | 1.00 | 0.00 | C |
| ATOM | 4167 | HZ   | PHE | 267 | 57.251 | 36.609 | 17.784 | 1.00 | 0.00 | H |
| ATOM | 4168 | CE2  | PHE | 267 | 56.037 | 36.361 | 19.556 | 1.00 | 0.00 | C |
| ATOM | 4169 | HE2  | PHE | 267 | 55.394 | 35.616 | 19.109 | 1.00 | 0.00 | H |
| ATOM | 4170 | CD2  | PHE | 267 | 55.822 | 36.771 | 20.885 | 1.00 | 0.00 | C |
| ATOM | 4171 | HD2  | PHE | 267 | 55.010 | 36.342 | 21.455 | 1.00 | 0.00 | H |
| ATOM | 4172 | C    | PHE | 267 | 53.980 | 38.938 | 22.548 | 1.00 | 0.00 | C |
| ATOM | 4173 | O    | PHE | 267 | 53.554 | 39.249 | 21.433 | 1.00 | 0.00 | O |
| ATOM | 4174 | N    | ALA | 268 | 53.224 | 38.265 | 23.420 | 1.00 | 0.00 | N |
| ATOM | 4175 | H    | ALA | 268 | 53.631 | 37.997 | 24.311 | 1.00 | 0.00 | H |
| ATOM | 4176 | CA   | ALA | 268 | 51.836 | 37.886 | 23.168 | 1.00 | 0.00 | C |
| ATOM | 4177 | HA   | ALA | 268 | 51.792 | 37.313 | 22.240 | 1.00 | 0.00 | H |
| ATOM | 4178 | CB   | ALA | 268 | 51.345 | 36.990 | 24.313 | 1.00 | 0.00 | C |
| ATOM | 4179 | HB1  | ALA | 268 | 51.973 | 36.100 | 24.382 | 1.00 | 0.00 | H |
| ATOM | 4180 | HB2  | ALA | 268 | 50.317 | 36.680 | 24.124 | 1.00 | 0.00 | H |
| ATOM | 4181 | HB3  | ALA | 268 | 51.387 | 37.528 | 25.260 | 1.00 | 0.00 | H |
| ATOM | 4182 | C    | ALA | 268 | 50.944 | 39.123 | 22.992 | 1.00 | 0.00 | C |
| ATOM | 4183 | O    | ALA | 268 | 50.177 | 39.187 | 22.034 | 1.00 | 0.00 | O |
| ATOM | 4184 | N    | ILE | 269 | 51.092 | 40.134 | 23.855 | 1.00 | 0.00 | N |
| ATOM | 4185 | H    | ILE | 269 | 51.728 | 40.004 | 24.638 | 1.00 | 0.00 | H |
| ATOM | 4186 | CA   | ILE | 269 | 50.405 | 41.426 | 23.735 | 1.00 | 0.00 | C |
| ATOM | 4187 | HA   | ILE | 269 | 49.332 | 41.239 | 23.677 | 1.00 | 0.00 | H |
| ATOM | 4188 | CB   | ILE | 269 | 50.659 | 42.283 | 25.000 | 1.00 | 0.00 | C |
| ATOM | 4189 | HB   | ILE | 269 | 51.723 | 42.241 | 25.236 | 1.00 | 0.00 | H |
| ATOM | 4190 | CG2  | ILE | 269 | 50.283 | 43.762 | 24.797 | 1.00 | 0.00 | C |
| ATOM | 4191 | HG21 | ILE | 269 | 50.939 | 44.210 | 24.051 | 1.00 | 0.00 | H |
| ATOM | 4192 | HG22 | ILE | 269 | 50.413 | 44.322 | 25.721 | 1.00 | 0.00 | H |
| ATOM | 4193 | HG23 | ILE | 269 | 49.248 | 43.847 | 24.465 | 1.00 | 0.00 | H |
| ATOM | 4194 | CG1  | ILE | 269 | 49.856 | 41.690 | 26.184 | 1.00 | 0.00 | C |
| ATOM | 4195 | HG12 | ILE | 269 | 48.794 | 41.900 | 26.047 | 1.00 | 0.00 | H |
| ATOM | 4196 | HG13 | ILE | 269 | 49.973 | 40.606 | 26.199 | 1.00 | 0.00 | H |
| ATOM | 4197 | CD1  | ILE | 269 | 50.295 | 42.207 | 27.560 | 1.00 | 0.00 | C |
| ATOM | 4198 | HD11 | ILE | 269 | 51.371 | 42.084 | 27.681 | 1.00 | 0.00 | H |
| ATOM | 4199 | HD12 | ILE | 269 | 49.786 | 41.633 | 28.335 | 1.00 | 0.00 | H |
| ATOM | 4200 | HD13 | ILE | 269 | 50.031 | 43.256 | 27.675 | 1.00 | 0.00 | H |
| ATOM | 4201 | C    | ILE | 269 | 50.787 | 42.123 | 22.420 | 1.00 | 0.00 | C |
| ATOM | 4202 | O    | ILE | 269 | 49.896 | 42.593 | 21.722 | 1.00 | 0.00 | O |
| ATOM | 4203 | N    | LEU | 270 | 52.061 | 42.115 | 22.010 | 1.00 | 0.00 | N |
| ATOM | 4204 | H    | LEU | 270 | 52.767 | 41.743 | 22.638 | 1.00 | 0.00 | H |
| ATOM | 4205 | CA   | LEU | 270 | 52.501 | 42.675 | 20.725 | 1.00 | 0.00 | C |
| ATOM | 4206 | HA   | LEU | 270 | 52.205 | 43.724 | 20.703 | 1.00 | 0.00 | H |
| ATOM | 4207 | CB   | LEU | 270 | 54.039 | 42.613 | 20.651 | 1.00 | 0.00 | C |
| ATOM | 4208 | HB2  | LEU | 270 | 54.451 | 43.188 | 21.482 | 1.00 | 0.00 | H |
| ATOM | 4209 | HB3  | LEU | 270 | 54.353 | 41.579 | 20.778 | 1.00 | 0.00 | H |

|      |      |      |     |     |        |        |        |      |      |   |
|------|------|------|-----|-----|--------|--------|--------|------|------|---|
| ATOM | 4210 | CG   | LEU | 270 | 54.650 | 43.133 | 19.335 | 1.00 | 0.00 | C |
| ATOM | 4211 | HG   | LEU | 270 | 54.266 | 42.549 | 18.498 | 1.00 | 0.00 | H |
| ATOM | 4212 | CD1  | LEU | 270 | 54.339 | 44.611 | 19.093 | 1.00 | 0.00 | C |
| ATOM | 4213 | HD11 | LEU | 270 | 53.267 | 44.750 | 18.952 | 1.00 | 0.00 | H |
| ATOM | 4214 | HD12 | LEU | 270 | 54.849 | 44.951 | 18.191 | 1.00 | 0.00 | H |
| ATOM | 4215 | HD13 | LEU | 270 | 54.677 | 45.209 | 19.939 | 1.00 | 0.00 | H |
| ATOM | 4216 | CD2  | LEU | 270 | 56.169 | 42.961 | 19.375 | 1.00 | 0.00 | C |
| ATOM | 4217 | HD21 | LEU | 270 | 56.591 | 43.540 | 20.197 | 1.00 | 0.00 | H |
| ATOM | 4218 | HD22 | LEU | 270 | 56.417 | 41.908 | 19.514 | 1.00 | 0.00 | H |
| ATOM | 4219 | HD23 | LEU | 270 | 56.605 | 43.302 | 18.436 | 1.00 | 0.00 | H |
| ATOM | 4220 | C    | LEU | 270 | 51.815 | 41.998 | 19.521 | 1.00 | 0.00 | C |
| ATOM | 4221 | O    | LEU | 270 | 51.252 | 42.695 | 18.673 | 1.00 | 0.00 | O |
| ATOM | 4222 | N    | ARG | 271 | 51.775 | 40.656 | 19.463 | 1.00 | 0.00 | N |
| ATOM | 4223 | H    | ARG | 271 | 52.271 | 40.127 | 20.179 | 1.00 | 0.00 | H |
| ATOM | 4224 | CA   | ARG | 271 | 51.002 | 39.944 | 18.423 | 1.00 | 0.00 | C |
| ATOM | 4225 | HA   | ARG | 271 | 51.319 | 40.318 | 17.447 | 1.00 | 0.00 | H |
| ATOM | 4226 | CB   | ARG | 271 | 51.267 | 38.424 | 18.458 | 1.00 | 0.00 | C |
| ATOM | 4227 | HB2  | ARG | 271 | 52.323 | 38.250 | 18.246 | 1.00 | 0.00 | H |
| ATOM | 4228 | HB3  | ARG | 271 | 51.043 | 38.032 | 19.451 | 1.00 | 0.00 | H |
| ATOM | 4229 | CG   | ARG | 271 | 50.410 | 37.680 | 17.411 | 1.00 | 0.00 | C |
| ATOM | 4230 | HG2  | ARG | 271 | 49.366 | 37.704 | 17.729 | 1.00 | 0.00 | H |
| ATOM | 4231 | HG3  | ARG | 271 | 50.491 | 38.189 | 16.449 | 1.00 | 0.00 | H |
| ATOM | 4232 | CD   | ARG | 271 | 50.817 | 36.214 | 17.220 | 1.00 | 0.00 | C |
| ATOM | 4233 | HD2  | ARG | 271 | 51.826 | 36.187 | 16.812 | 1.00 | 0.00 | H |
| ATOM | 4234 | HD3  | ARG | 271 | 50.821 | 35.718 | 18.193 | 1.00 | 0.00 | H |
| ATOM | 4235 | NE   | ARG | 271 | 49.877 | 35.507 | 16.322 | 1.00 | 0.00 | N |
| ATOM | 4236 | HE   | ARG | 271 | 48.954 | 35.919 | 16.204 | 1.00 | 0.00 | H |
| ATOM | 4237 | CZ   | ARG | 271 | 50.094 | 34.395 | 15.638 | 1.00 | 0.00 | C |
| ATOM | 4238 | NH1  | ARG | 271 | 51.289 | 33.897 | 15.490 | 1.00 | 0.00 | N |
| ATOM | 4239 | HH11 | ARG | 271 | 52.095 | 34.430 | 15.781 | 1.00 | 0.00 | H |
| ATOM | 4240 | HH12 | ARG | 271 | 51.425 | 33.035 | 14.980 | 1.00 | 0.00 | H |
| ATOM | 4241 | NH2  | ARG | 271 | 49.112 | 33.750 | 15.078 | 1.00 | 0.00 | N |
| ATOM | 4242 | HH21 | ARG | 271 | 48.153 | 33.960 | 15.364 | 1.00 | 0.00 | H |
| ATOM | 4243 | HH22 | ARG | 271 | 49.288 | 32.868 | 14.609 | 1.00 | 0.00 | H |
| ATOM | 4244 | C    | ARG | 271 | 49.510 | 40.264 | 18.524 | 1.00 | 0.00 | C |
| ATOM | 4245 | O    | ARG | 271 | 48.872 | 40.472 | 17.500 | 1.00 | 0.00 | O |
| ATOM | 4246 | N    | ARG | 272 | 48.949 | 40.337 | 19.733 | 1.00 | 0.00 | N |
| ATOM | 4247 | H    | ARG | 272 | 49.543 | 40.140 | 20.535 | 1.00 | 0.00 | H |
| ATOM | 4248 | CA   | ARG | 272 | 47.526 | 40.624 | 19.973 | 1.00 | 0.00 | C |
| ATOM | 4249 | HA   | ARG | 272 | 46.944 | 40.083 | 19.229 | 1.00 | 0.00 | H |
| ATOM | 4250 | CB   | ARG | 272 | 47.127 | 40.094 | 21.368 | 1.00 | 0.00 | C |
| ATOM | 4251 | HB2  | ARG | 272 | 47.810 | 40.505 | 22.106 | 1.00 | 0.00 | H |
| ATOM | 4252 | HB3  | ARG | 272 | 46.124 | 40.437 | 21.629 | 1.00 | 0.00 | H |
| ATOM | 4253 | CG   | ARG | 272 | 47.160 | 38.550 | 21.450 | 1.00 | 0.00 | C |
| ATOM | 4254 | HG2  | ARG | 272 | 48.064 | 38.176 | 20.966 | 1.00 | 0.00 | H |
| ATOM | 4255 | HG3  | ARG | 272 | 47.208 | 38.255 | 22.498 | 1.00 | 0.00 | H |
| ATOM | 4256 | CD   | ARG | 272 | 45.946 | 37.867 | 20.811 | 1.00 | 0.00 | C |
| ATOM | 4257 | HD2  | ARG | 272 | 45.067 | 38.051 | 21.436 | 1.00 | 0.00 | H |
| ATOM | 4258 | HD3  | ARG | 272 | 45.750 | 38.320 | 19.839 | 1.00 | 0.00 | H |
| ATOM | 4259 | NE   | ARG | 272 | 46.151 | 36.405 | 20.673 | 1.00 | 0.00 | N |
| ATOM | 4260 | HE   | ARG | 272 | 46.252 | 35.863 | 21.517 | 1.00 | 0.00 | H |
| ATOM | 4261 | CZ   | ARG | 272 | 46.204 | 35.705 | 19.549 | 1.00 | 0.00 | C |

|      |      |      |     |     |        |        |        |      |      |   |
|------|------|------|-----|-----|--------|--------|--------|------|------|---|
| ATOM | 4262 | NH1  | ARG | 272 | 46.079 | 36.249 | 18.374 | 1.00 | 0.00 | N |
| ATOM | 4263 | HH11 | ARG | 272 | 45.899 | 37.226 | 18.281 | 1.00 | 0.00 | H |
| ATOM | 4264 | HH12 | ARG | 272 | 46.120 | 35.641 | 17.559 | 1.00 | 0.00 | H |
| ATOM | 4265 | NH2  | ARG | 272 | 46.390 | 34.419 | 19.567 | 1.00 | 0.00 | N |
| ATOM | 4266 | HH21 | ARG | 272 | 46.524 | 33.915 | 20.445 | 1.00 | 0.00 | H |
| ATOM | 4267 | HH22 | ARG | 272 | 46.365 | 33.916 | 18.686 | 1.00 | 0.00 | H |
| ATOM | 4268 | C    | ARG | 272 | 47.142 | 42.094 | 19.743 | 1.00 | 0.00 | C |
| ATOM | 4269 | O    | ARG | 272 | 45.954 | 42.340 | 19.586 | 1.00 | 0.00 | O |
| ATOM | 4270 | N    | ILE | 273 | 48.092 | 43.027 | 19.635 | 1.00 | 0.00 | N |
| ATOM | 4271 | H    | ILE | 273 | 49.020 | 42.772 | 19.953 | 1.00 | 0.00 | H |
| ATOM | 4272 | CA   | ILE | 273 | 47.906 | 44.387 | 19.084 | 1.00 | 0.00 | C |
| ATOM | 4273 | HA   | ILE | 273 | 46.928 | 44.769 | 19.387 | 1.00 | 0.00 | H |
| ATOM | 4274 | CB   | ILE | 273 | 48.996 | 45.331 | 19.651 | 1.00 | 0.00 | C |
| ATOM | 4275 | HB   | ILE | 273 | 49.962 | 44.841 | 19.528 | 1.00 | 0.00 | H |
| ATOM | 4276 | CG2  | ILE | 273 | 49.060 | 46.681 | 18.909 | 1.00 | 0.00 | C |
| ATOM | 4277 | HG21 | ILE | 273 | 49.384 | 46.533 | 17.879 | 1.00 | 0.00 | H |
| ATOM | 4278 | HG22 | ILE | 273 | 49.777 | 47.347 | 19.388 | 1.00 | 0.00 | H |
| ATOM | 4279 | HG23 | ILE | 273 | 48.079 | 47.154 | 18.910 | 1.00 | 0.00 | H |
| ATOM | 4280 | CG1  | ILE | 273 | 48.763 | 45.593 | 21.157 | 1.00 | 0.00 | C |
| ATOM | 4281 | HG12 | ILE | 273 | 48.007 | 46.366 | 21.281 | 1.00 | 0.00 | H |
| ATOM | 4282 | HG13 | ILE | 273 | 48.387 | 44.693 | 21.642 | 1.00 | 0.00 | H |
| ATOM | 4283 | CD1  | ILE | 273 | 50.044 | 46.009 | 21.890 | 1.00 | 0.00 | C |
| ATOM | 4284 | HD11 | ILE | 273 | 50.822 | 45.263 | 21.741 | 1.00 | 0.00 | H |
| ATOM | 4285 | HD12 | ILE | 273 | 49.835 | 46.089 | 22.956 | 1.00 | 0.00 | H |
| ATOM | 4286 | HD13 | ILE | 273 | 50.396 | 46.975 | 21.531 | 1.00 | 0.00 | H |
| ATOM | 4287 | C    | ILE | 273 | 47.920 | 44.361 | 17.543 | 1.00 | 0.00 | C |
| ATOM | 4288 | O    | ILE | 273 | 47.177 | 45.098 | 16.903 | 1.00 | 0.00 | O |
| ATOM | 4289 | N    | GLN | 274 | 48.713 | 43.470 | 16.937 | 1.00 | 0.00 | N |
| ATOM | 4290 | H    | GLN | 274 | 49.328 | 42.919 | 17.523 | 1.00 | 0.00 | H |
| ATOM | 4291 | CA   | GLN | 274 | 48.678 | 43.131 | 15.501 | 1.00 | 0.00 | C |
| ATOM | 4292 | HA   | GLN | 274 | 48.528 | 44.058 | 14.947 | 1.00 | 0.00 | H |
| ATOM | 4293 | CB   | GLN | 274 | 50.061 | 42.549 | 15.126 | 1.00 | 0.00 | C |
| ATOM | 4294 | HB2  | GLN | 274 | 50.834 | 43.128 | 15.634 | 1.00 | 0.00 | H |
| ATOM | 4295 | HB3  | GLN | 274 | 50.129 | 41.531 | 15.508 | 1.00 | 0.00 | H |
| ATOM | 4296 | CG   | GLN | 274 | 50.412 | 42.512 | 13.625 | 1.00 | 0.00 | C |
| ATOM | 4297 | HG2  | GLN | 274 | 51.411 | 42.089 | 13.532 | 1.00 | 0.00 | H |
| ATOM | 4298 | HG3  | GLN | 274 | 49.731 | 41.855 | 13.089 | 1.00 | 0.00 | H |
| ATOM | 4299 | CD   | GLN | 274 | 50.433 | 43.876 | 12.940 | 1.00 | 0.00 | C |
| ATOM | 4300 | OE1  | GLN | 274 | 49.962 | 44.048 | 11.827 | 1.00 | 0.00 | O |
| ATOM | 4301 | NE2  | GLN | 274 | 50.978 | 44.903 | 13.556 | 1.00 | 0.00 | N |
| ATOM | 4302 | HE21 | GLN | 274 | 50.999 | 45.767 | 13.047 | 1.00 | 0.00 | H |
| ATOM | 4303 | HE22 | GLN | 274 | 51.391 | 44.790 | 14.464 | 1.00 | 0.00 | H |
| ATOM | 4304 | C    | GLN | 274 | 47.497 | 42.190 | 15.129 | 1.00 | 0.00 | C |
| ATOM | 4305 | O    | GLN | 274 | 47.473 | 41.599 | 14.048 | 1.00 | 0.00 | O |
| ATOM | 4306 | N    | GLN | 275 | 46.532 | 42.004 | 16.036 | 1.00 | 0.00 | N |
| ATOM | 4307 | H    | GLN | 275 | 46.563 | 42.601 | 16.851 | 1.00 | 0.00 | H |
| ATOM | 4308 | CA   | GLN | 275 | 45.361 | 41.120 | 15.949 | 1.00 | 0.00 | C |
| ATOM | 4309 | HA   | GLN | 275 | 44.930 | 41.187 | 14.951 | 1.00 | 0.00 | H |
| ATOM | 4310 | CB   | GLN | 275 | 45.794 | 39.651 | 16.225 | 1.00 | 0.00 | C |
| ATOM | 4311 | HB2  | GLN | 275 | 46.658 | 39.633 | 16.883 | 1.00 | 0.00 | H |
| ATOM | 4312 | HB3  | GLN | 275 | 45.021 | 39.098 | 16.754 | 1.00 | 0.00 | H |
| ATOM | 4313 | CG   | GLN | 275 | 46.082 | 38.853 | 14.944 | 1.00 | 0.00 | C |

|      |      |      |     |     |        |        |        |      |      |   |
|------|------|------|-----|-----|--------|--------|--------|------|------|---|
| ATOM | 4314 | HG2  | GLN | 275 | 45.376 | 38.025 | 14.879 | 1.00 | 0.00 | H |
| ATOM | 4315 | HG3  | GLN | 275 | 45.925 | 39.469 | 14.059 | 1.00 | 0.00 | H |
| ATOM | 4316 | CD   | GLN | 275 | 47.489 | 38.271 | 14.904 | 1.00 | 0.00 | C |
| ATOM | 4317 | OE1  | GLN | 275 | 47.782 | 37.247 | 15.506 | 1.00 | 0.00 | O |
| ATOM | 4318 | NE2  | GLN | 275 | 48.384 | 38.884 | 14.167 | 1.00 | 0.00 | N |
| ATOM | 4319 | HE21 | GLN | 275 | 49.283 | 38.441 | 14.031 | 1.00 | 0.00 | H |
| ATOM | 4320 | HE22 | GLN | 275 | 48.161 | 39.801 | 13.792 | 1.00 | 0.00 | H |
| ATOM | 4321 | C    | GLN | 275 | 44.280 | 41.632 | 16.926 | 1.00 | 0.00 | C |
| ATOM | 4322 | O    | GLN | 275 | 44.281 | 42.804 | 17.294 | 1.00 | 0.00 | O |
| ATOM | 4323 | N    | SER | 276 | 43.342 | 40.775 | 17.340 | 1.00 | 0.00 | N |
| ATOM | 4324 | H    | SER | 276 | 43.378 | 39.839 | 16.953 | 1.00 | 0.00 | H |
| ATOM | 4325 | CA   | SER | 276 | 42.277 | 40.993 | 18.339 | 1.00 | 0.00 | C |
| ATOM | 4326 | HA   | SER | 276 | 41.756 | 40.040 | 18.429 | 1.00 | 0.00 | H |
| ATOM | 4327 | CB   | SER | 276 | 42.848 | 41.294 | 19.732 | 1.00 | 0.00 | C |
| ATOM | 4328 | HB2  | SER | 276 | 43.076 | 42.359 | 19.806 | 1.00 | 0.00 | H |
| ATOM | 4329 | HB3  | SER | 276 | 42.099 | 41.040 | 20.483 | 1.00 | 0.00 | H |
| ATOM | 4330 | OG   | SER | 276 | 44.026 | 40.568 | 20.002 | 1.00 | 0.00 | O |
| ATOM | 4331 | HG   | SER | 276 | 44.751 | 41.201 | 19.819 | 1.00 | 0.00 | H |
| ATOM | 4332 | C    | SER | 276 | 41.198 | 42.023 | 17.969 | 1.00 | 0.00 | C |
| ATOM | 4333 | O    | SER | 276 | 40.052 | 41.857 | 18.394 | 1.00 | 0.00 | O |
| ATOM | 4334 | N    | GLY | 277 | 41.529 | 43.036 | 17.167 | 1.00 | 0.00 | N |
| ATOM | 4335 | H    | GLY | 277 | 42.514 | 43.113 | 16.926 | 1.00 | 0.00 | H |
| ATOM | 4336 | CA   | GLY | 277 | 40.639 | 44.022 | 16.551 | 1.00 | 0.00 | C |
| ATOM | 4337 | HA2  | GLY | 277 | 39.692 | 43.553 | 16.281 | 1.00 | 0.00 | H |
| ATOM | 4338 | HA3  | GLY | 277 | 40.435 | 44.818 | 17.266 | 1.00 | 0.00 | H |
| ATOM | 4339 | C    | GLY | 277 | 41.267 | 44.634 | 15.286 | 1.00 | 0.00 | C |
| ATOM | 4340 | O    | GLY | 277 | 42.271 | 44.137 | 14.768 | 1.00 | 0.00 | O |
| ATOM | 4341 | N    | SER | 278 | 40.670 | 45.699 | 14.752 | 1.00 | 0.00 | N |
| ATOM | 4342 | H    | SER | 278 | 39.790 | 45.995 | 15.154 | 1.00 | 0.00 | H |
| ATOM | 4343 | CA   | SER | 278 | 41.227 | 46.563 | 13.688 | 1.00 | 0.00 | C |
| ATOM | 4344 | HA   | SER | 278 | 42.276 | 46.777 | 13.901 | 1.00 | 0.00 | H |
| ATOM | 4345 | CB   | SER | 278 | 41.127 | 45.908 | 12.304 | 1.00 | 0.00 | C |
| ATOM | 4346 | HB2  | SER | 278 | 40.160 | 45.414 | 12.194 | 1.00 | 0.00 | H |
| ATOM | 4347 | HB3  | SER | 278 | 41.228 | 46.667 | 11.526 | 1.00 | 0.00 | H |
| ATOM | 4348 | OG   | SER | 278 | 42.176 | 44.969 | 12.159 | 1.00 | 0.00 | O |
| ATOM | 4349 | HG   | SER | 278 | 42.300 | 44.556 | 13.031 | 1.00 | 0.00 | H |
| ATOM | 4350 | C    | SER | 278 | 40.458 | 47.882 | 13.688 | 1.00 | 0.00 | C |
| ATOM | 4351 | O    | SER | 278 | 39.227 | 47.848 | 13.746 | 1.00 | 0.00 | O |
| ATOM | 4352 | N    | ALA | 279 | 41.174 | 49.012 | 13.725 | 1.00 | 0.00 | N |
| ATOM | 4353 | H    | ALA | 279 | 42.157 | 48.926 | 13.488 | 1.00 | 0.00 | H |
| ATOM | 4354 | CA   | ALA | 279 | 40.727 | 50.345 | 14.186 | 1.00 | 0.00 | C |
| ATOM | 4355 | HA   | ALA | 279 | 41.613 | 50.981 | 14.195 | 1.00 | 0.00 | H |
| ATOM | 4356 | CB   | ALA | 279 | 39.766 | 50.951 | 13.153 | 1.00 | 0.00 | C |
| ATOM | 4357 | HB1  | ALA | 279 | 38.837 | 50.382 | 13.123 | 1.00 | 0.00 | H |
| ATOM | 4358 | HB2  | ALA | 279 | 40.227 | 50.943 | 12.164 | 1.00 | 0.00 | H |
| ATOM | 4359 | HB3  | ALA | 279 | 39.535 | 51.980 | 13.429 | 1.00 | 0.00 | H |
| ATOM | 4360 | C    | ALA | 279 | 40.164 | 50.411 | 15.634 | 1.00 | 0.00 | C |
| ATOM | 4361 | O    | ALA | 279 | 40.266 | 51.450 | 16.289 | 1.00 | 0.00 | O |
| ATOM | 4362 | N    | ASP | 280 | 39.611 | 49.307 | 16.137 | 1.00 | 0.00 | N |
| ATOM | 4363 | H    | ASP | 280 | 39.412 | 48.584 | 15.461 | 1.00 | 0.00 | H |
| ATOM | 4364 | CA   | ASP | 280 | 39.051 | 49.117 | 17.476 | 1.00 | 0.00 | C |
| ATOM | 4365 | HA   | ASP | 280 | 38.244 | 49.840 | 17.602 | 1.00 | 0.00 | H |

|      |      |      |     |     |        |        |        |      |      |   |
|------|------|------|-----|-----|--------|--------|--------|------|------|---|
| ATOM | 4366 | CB   | ASP | 280 | 38.450 | 47.702 | 17.572 | 1.00 | 0.00 | C |
| ATOM | 4367 | HB2  | ASP | 280 | 39.255 | 46.977 | 17.440 | 1.00 | 0.00 | H |
| ATOM | 4368 | HB3  | ASP | 280 | 38.042 | 47.562 | 18.574 | 1.00 | 0.00 | H |
| ATOM | 4369 | CG   | ASP | 280 | 37.333 | 47.378 | 16.574 | 1.00 | 0.00 | C |
| ATOM | 4370 | OD1  | ASP | 280 | 36.690 | 48.301 | 16.034 | 1.00 | 0.00 | O |
| ATOM | 4371 | OD2  | ASP | 280 | 37.057 | 46.164 | 16.401 | 1.00 | 0.00 | O |
| ATOM | 4372 | C    | ASP | 280 | 40.047 | 49.308 | 18.639 | 1.00 | 0.00 | C |
| ATOM | 4373 | O    | ASP | 280 | 41.262 | 49.156 | 18.509 | 1.00 | 0.00 | O |
| ATOM | 4374 | N    | LEU | 281 | 39.486 | 49.529 | 19.833 | 1.00 | 0.00 | N |
| ATOM | 4375 | H    | LEU | 281 | 38.481 | 49.602 | 19.838 | 1.00 | 0.00 | H |
| ATOM | 4376 | CA   | LEU | 281 | 40.163 | 49.872 | 21.093 | 1.00 | 0.00 | C |
| ATOM | 4377 | HA   | LEU | 281 | 40.639 | 50.845 | 20.959 | 1.00 | 0.00 | H |
| ATOM | 4378 | CB   | LEU | 281 | 39.043 | 49.989 | 22.150 | 1.00 | 0.00 | C |
| ATOM | 4379 | HB2  | LEU | 281 | 38.190 | 50.510 | 21.710 | 1.00 | 0.00 | H |
| ATOM | 4380 | HB3  | LEU | 281 | 38.714 | 48.979 | 22.400 | 1.00 | 0.00 | H |
| ATOM | 4381 | CG   | LEU | 281 | 39.413 | 50.724 | 23.452 | 1.00 | 0.00 | C |
| ATOM | 4382 | HG   | LEU | 281 | 40.327 | 50.319 | 23.874 | 1.00 | 0.00 | H |
| ATOM | 4383 | CD1  | LEU | 281 | 39.609 | 52.220 | 23.202 | 1.00 | 0.00 | C |
| ATOM | 4384 | HD11 | LEU | 281 | 40.513 | 52.381 | 22.615 | 1.00 | 0.00 | H |
| ATOM | 4385 | HD12 | LEU | 281 | 39.722 | 52.747 | 24.148 | 1.00 | 0.00 | H |
| ATOM | 4386 | HD13 | LEU | 281 | 38.758 | 52.637 | 22.665 | 1.00 | 0.00 | H |
| ATOM | 4387 | CD2  | LEU | 281 | 38.292 | 50.506 | 24.470 | 1.00 | 0.00 | C |
| ATOM | 4388 | HD21 | LEU | 281 | 37.338 | 50.829 | 24.055 | 1.00 | 0.00 | H |
| ATOM | 4389 | HD22 | LEU | 281 | 38.224 | 49.447 | 24.722 | 1.00 | 0.00 | H |
| ATOM | 4390 | HD23 | LEU | 281 | 38.505 | 51.065 | 25.381 | 1.00 | 0.00 | H |
| ATOM | 4391 | C    | LEU | 281 | 41.258 | 48.888 | 21.566 | 1.00 | 0.00 | C |
| ATOM | 4392 | O    | LEU | 281 | 42.070 | 49.232 | 22.420 | 1.00 | 0.00 | O |
| ATOM | 4393 | N    | ARG | 282 | 41.310 | 47.665 | 21.024 | 1.00 | 0.00 | N |
| ATOM | 4394 | H    | ARG | 282 | 40.683 | 47.494 | 20.250 | 1.00 | 0.00 | H |
| ATOM | 4395 | CA   | ARG | 282 | 42.277 | 46.608 | 21.391 | 1.00 | 0.00 | C |
| ATOM | 4396 | HA   | ARG | 282 | 42.326 | 46.564 | 22.480 | 1.00 | 0.00 | H |
| ATOM | 4397 | CB   | ARG | 282 | 41.758 | 45.244 | 20.885 | 1.00 | 0.00 | C |
| ATOM | 4398 | HB2  | ARG | 282 | 41.428 | 45.341 | 19.848 | 1.00 | 0.00 | H |
| ATOM | 4399 | HB3  | ARG | 282 | 42.569 | 44.515 | 20.913 | 1.00 | 0.00 | H |
| ATOM | 4400 | CG   | ARG | 282 | 40.607 | 44.700 | 21.757 | 1.00 | 0.00 | C |
| ATOM | 4401 | HG2  | ARG | 282 | 40.995 | 44.496 | 22.757 | 1.00 | 0.00 | H |
| ATOM | 4402 | HG3  | ARG | 282 | 39.807 | 45.438 | 21.832 | 1.00 | 0.00 | H |
| ATOM | 4403 | CD   | ARG | 282 | 40.038 | 43.406 | 21.160 | 1.00 | 0.00 | C |
| ATOM | 4404 | HD2  | ARG | 282 | 39.435 | 43.660 | 20.285 | 1.00 | 0.00 | H |
| ATOM | 4405 | HD3  | ARG | 282 | 40.870 | 42.786 | 20.835 | 1.00 | 0.00 | H |
| ATOM | 4406 | NE   | ARG | 282 | 39.229 | 42.626 | 22.119 | 1.00 | 0.00 | N |
| ATOM | 4407 | HE   | ARG | 282 | 39.137 | 42.967 | 23.066 | 1.00 | 0.00 | H |
| ATOM | 4408 | CZ   | ARG | 282 | 38.641 | 41.464 | 21.878 | 1.00 | 0.00 | C |
| ATOM | 4409 | NH1  | ARG | 282 | 38.676 | 40.898 | 20.708 | 1.00 | 0.00 | N |
| ATOM | 4410 | HH11 | ARG | 282 | 39.142 | 41.373 | 19.947 | 1.00 | 0.00 | H |
| ATOM | 4411 | HH12 | ARG | 282 | 38.296 | 39.968 | 20.566 | 1.00 | 0.00 | H |
| ATOM | 4412 | NH2  | ARG | 282 | 37.999 | 40.869 | 22.837 | 1.00 | 0.00 | N |
| ATOM | 4413 | HH21 | ARG | 282 | 38.020 | 41.283 | 23.759 | 1.00 | 0.00 | H |
| ATOM | 4414 | HH22 | ARG | 282 | 37.501 | 39.997 | 22.686 | 1.00 | 0.00 | H |
| ATOM | 4415 | C    | ARG | 282 | 43.738 | 46.896 | 20.977 | 1.00 | 0.00 | C |
| ATOM | 4416 | O    | ARG | 282 | 44.604 | 46.058 | 21.217 | 1.00 | 0.00 | O |
| ATOM | 4417 | N    | LYS | 283 | 44.039 | 48.088 | 20.440 | 1.00 | 0.00 | N |



|      |      |      |     |     |        |        |        |      |      |   |
|------|------|------|-----|-----|--------|--------|--------|------|------|---|
| ATOM | 4418 | H    | LYS | 283 | 43.253 | 48.700 | 20.268 | 1.00 | 0.00 | H |
| ATOM | 4419 | CA   | LYS | 283 | 45.389 | 48.660 | 20.218 | 1.00 | 0.00 | C |
| ATOM | 4420 | HA   | LYS | 283 | 45.997 | 47.891 | 19.740 | 1.00 | 0.00 | H |
| ATOM | 4421 | CB   | LYS | 283 | 45.243 | 49.845 | 19.238 | 1.00 | 0.00 | C |
| ATOM | 4422 | HB2  | LYS | 283 | 44.477 | 49.601 | 18.499 | 1.00 | 0.00 | H |
| ATOM | 4423 | HB3  | LYS | 283 | 44.911 | 50.734 | 19.779 | 1.00 | 0.00 | H |
| ATOM | 4424 | CG   | LYS | 283 | 46.540 | 50.147 | 18.474 | 1.00 | 0.00 | C |
| ATOM | 4425 | HG2  | LYS | 283 | 47.350 | 50.342 | 19.179 | 1.00 | 0.00 | H |
| ATOM | 4426 | HG3  | LYS | 283 | 46.802 | 49.277 | 17.870 | 1.00 | 0.00 | H |
| ATOM | 4427 | CD   | LYS | 283 | 46.365 | 51.368 | 17.557 | 1.00 | 0.00 | C |
| ATOM | 4428 | HD2  | LYS | 283 | 45.467 | 51.249 | 16.947 | 1.00 | 0.00 | H |
| ATOM | 4429 | HD3  | LYS | 283 | 46.253 | 52.257 | 18.176 | 1.00 | 0.00 | H |
| ATOM | 4430 | CE   | LYS | 283 | 47.581 | 51.521 | 16.638 | 1.00 | 0.00 | C |
| ATOM | 4431 | HE2  | LYS | 283 | 48.489 | 51.411 | 17.238 | 1.00 | 0.00 | H |
| ATOM | 4432 | HE3  | LYS | 283 | 47.561 | 50.716 | 15.898 | 1.00 | 0.00 | H |
| ATOM | 4433 | NZ   | LYS | 283 | 47.608 | 52.837 | 15.957 | 1.00 | 0.00 | N |
| ATOM | 4434 | HZ1  | LYS | 283 | 47.825 | 53.574 | 16.623 | 1.00 | 0.00 | H |
| ATOM | 4435 | HZ2  | LYS | 283 | 46.721 | 53.093 | 15.525 | 1.00 | 0.00 | H |
| ATOM | 4436 | HZ3  | LYS | 283 | 48.346 | 52.866 | 15.258 | 1.00 | 0.00 | H |
| ATOM | 4437 | C    | LYS | 283 | 46.095 | 49.029 | 21.551 | 1.00 | 0.00 | C |
| ATOM | 4438 | O    | LYS | 283 | 46.441 | 50.181 | 21.817 | 1.00 | 0.00 | O |
| ATOM | 4439 | N    | LEU | 284 | 46.208 | 48.029 | 22.424 | 1.00 | 0.00 | N |
| ATOM | 4440 | H    | LEU | 284 | 45.922 | 47.123 | 22.076 | 1.00 | 0.00 | H |
| ATOM | 4441 | CA   | LEU | 284 | 46.495 | 48.103 | 23.861 | 1.00 | 0.00 | C |
| ATOM | 4442 | HA   | LEU | 284 | 45.817 | 48.840 | 24.289 | 1.00 | 0.00 | H |
| ATOM | 4443 | CB   | LEU | 284 | 46.151 | 46.704 | 24.430 | 1.00 | 0.00 | C |
| ATOM | 4444 | HB2  | LEU | 284 | 45.174 | 46.410 | 24.042 | 1.00 | 0.00 | H |
| ATOM | 4445 | HB3  | LEU | 284 | 46.881 | 45.993 | 24.039 | 1.00 | 0.00 | H |
| ATOM | 4446 | CG   | LEU | 284 | 46.102 | 46.548 | 25.963 | 1.00 | 0.00 | C |
| ATOM | 4447 | HG   | LEU | 284 | 47.078 | 46.755 | 26.397 | 1.00 | 0.00 | H |
| ATOM | 4448 | CD1  | LEU | 284 | 45.060 | 47.480 | 26.579 | 1.00 | 0.00 | C |
| ATOM | 4449 | HD11 | LEU | 284 | 45.364 | 48.520 | 26.478 | 1.00 | 0.00 | H |
| ATOM | 4450 | HD12 | LEU | 284 | 44.950 | 47.257 | 27.639 | 1.00 | 0.00 | H |
| ATOM | 4451 | HD13 | LEU | 284 | 44.101 | 47.332 | 26.086 | 1.00 | 0.00 | H |
| ATOM | 4452 | CD2  | LEU | 284 | 45.725 | 45.113 | 26.329 | 1.00 | 0.00 | C |
| ATOM | 4453 | HD21 | LEU | 284 | 44.728 | 44.875 | 25.956 | 1.00 | 0.00 | H |
| ATOM | 4454 | HD22 | LEU | 284 | 46.448 | 44.421 | 25.898 | 1.00 | 0.00 | H |
| ATOM | 4455 | HD23 | LEU | 284 | 45.739 | 44.997 | 27.414 | 1.00 | 0.00 | H |
| ATOM | 4456 | C    | LEU | 284 | 47.935 | 48.538 | 24.208 | 1.00 | 0.00 | C |
| ATOM | 4457 | O    | LEU | 284 | 48.837 | 48.483 | 23.381 | 1.00 | 0.00 | O |
| ATOM | 4458 | N    | ASP | 285 | 48.159 | 48.913 | 25.470 | 1.00 | 0.00 | N |
| ATOM | 4459 | H    | ASP | 285 | 47.371 | 48.949 | 26.100 | 1.00 | 0.00 | H |
| ATOM | 4460 | CA   | ASP | 285 | 49.474 | 49.101 | 26.092 | 1.00 | 0.00 | C |
| ATOM | 4461 | HA   | ASP | 285 | 50.220 | 48.521 | 25.545 | 1.00 | 0.00 | H |
| ATOM | 4462 | CB   | ASP | 285 | 49.877 | 50.582 | 26.046 | 1.00 | 0.00 | C |
| ATOM | 4463 | HB2  | ASP | 285 | 49.003 | 51.197 | 26.266 | 1.00 | 0.00 | H |
| ATOM | 4464 | HB3  | ASP | 285 | 50.620 | 50.767 | 26.824 | 1.00 | 0.00 | H |
| ATOM | 4465 | CG   | ASP | 285 | 50.492 | 51.014 | 24.716 | 1.00 | 0.00 | C |
| ATOM | 4466 | OD1  | ASP | 285 | 51.588 | 50.498 | 24.388 | 1.00 | 0.00 | O |
| ATOM | 4467 | OD2  | ASP | 285 | 49.962 | 51.965 | 24.087 | 1.00 | 0.00 | O |
| ATOM | 4468 | C    | ASP | 285 | 49.445 | 48.594 | 27.546 | 1.00 | 0.00 | C |
| ATOM | 4469 | O    | ASP | 285 | 48.472 | 48.820 | 28.266 | 1.00 | 0.00 | O |

|      |      |      |     |     |        |        |        |      |      |   |
|------|------|------|-----|-----|--------|--------|--------|------|------|---|
| ATOM | 4470 | N    | CYS | 286 | 50.518 | 47.935 | 27.988 | 1.00 | 0.00 | N |
| ATOM | 4471 | H    | CYS | 286 | 51.316 | 47.853 | 27.376 | 1.00 | 0.00 | H |
| ATOM | 4472 | CA   | CYS | 286 | 50.641 | 47.306 | 29.309 | 1.00 | 0.00 | C |
| ATOM | 4473 | HA   | CYS | 286 | 49.805 | 47.607 | 29.944 | 1.00 | 0.00 | H |
| ATOM | 4474 | CB   | CYS | 286 | 50.572 | 45.782 | 29.120 | 1.00 | 0.00 | C |
| ATOM | 4475 | HB2  | CYS | 286 | 49.652 | 45.533 | 28.588 | 1.00 | 0.00 | H |
| ATOM | 4476 | HB3  | CYS | 286 | 51.423 | 45.447 | 28.525 | 1.00 | 0.00 | H |
| ATOM | 4477 | SG   | CYS | 286 | 50.568 | 44.899 | 30.709 | 1.00 | 0.00 | S |
| ATOM | 4478 | HG   | CYS | 286 | 51.722 | 45.353 | 31.215 | 1.00 | 0.00 | H |
| ATOM | 4479 | C    | CYS | 286 | 51.938 | 47.743 | 30.008 | 1.00 | 0.00 | C |
| ATOM | 4480 | O    | CYS | 286 | 52.919 | 48.083 | 29.340 | 1.00 | 0.00 | O |
| ATOM | 4481 | N    | ARG | 287 | 51.942 | 47.711 | 31.343 | 1.00 | 0.00 | N |
| ATOM | 4482 | H    | ARG | 287 | 51.066 | 47.461 | 31.805 | 1.00 | 0.00 | H |
| ATOM | 4483 | CA   | ARG | 287 | 53.078 | 47.996 | 32.230 | 1.00 | 0.00 | C |
| ATOM | 4484 | HA   | ARG | 287 | 53.995 | 48.011 | 31.647 | 1.00 | 0.00 | H |
| ATOM | 4485 | CB   | ARG | 287 | 52.856 | 49.368 | 32.890 | 1.00 | 0.00 | C |
| ATOM | 4486 | HB2  | ARG | 287 | 51.919 | 49.338 | 33.450 | 1.00 | 0.00 | H |
| ATOM | 4487 | HB3  | ARG | 287 | 53.658 | 49.529 | 33.605 | 1.00 | 0.00 | H |
| ATOM | 4488 | CG   | ARG | 287 | 52.800 | 50.564 | 31.909 | 1.00 | 0.00 | C |
| ATOM | 4489 | HG2  | ARG | 287 | 51.950 | 50.447 | 31.237 | 1.00 | 0.00 | H |
| ATOM | 4490 | HG3  | ARG | 287 | 52.652 | 51.478 | 32.485 | 1.00 | 0.00 | H |
| ATOM | 4491 | CD   | ARG | 287 | 54.089 | 50.701 | 31.087 | 1.00 | 0.00 | C |
| ATOM | 4492 | HD2  | ARG | 287 | 54.918 | 50.780 | 31.786 | 1.00 | 0.00 | H |
| ATOM | 4493 | HD3  | ARG | 287 | 54.237 | 49.794 | 30.504 | 1.00 | 0.00 | H |
| ATOM | 4494 | NE   | ARG | 287 | 54.083 | 51.845 | 30.147 | 1.00 | 0.00 | N |
| ATOM | 4495 | HE   | ARG | 287 | 53.270 | 51.966 | 29.569 | 1.00 | 0.00 | H |
| ATOM | 4496 | CZ   | ARG | 287 | 55.119 | 52.620 | 29.862 | 1.00 | 0.00 | C |
| ATOM | 4497 | NH1  | ARG | 287 | 56.229 | 52.579 | 30.527 | 1.00 | 0.00 | N |
| ATOM | 4498 | HH11 | ARG | 287 | 56.386 | 51.927 | 31.275 | 1.00 | 0.00 | H |
| ATOM | 4499 | HH12 | ARG | 287 | 57.041 | 53.073 | 30.181 | 1.00 | 0.00 | H |
| ATOM | 4500 | NH2  | ARG | 287 | 55.111 | 53.452 | 28.865 | 1.00 | 0.00 | N |
| ATOM | 4501 | HH21 | ARG | 287 | 54.377 | 53.462 | 28.159 | 1.00 | 0.00 | H |
| ATOM | 4502 | HH22 | ARG | 287 | 55.941 | 53.977 | 28.662 | 1.00 | 0.00 | H |
| ATOM | 4503 | C    | ARG | 287 | 53.247 | 46.872 | 33.263 | 1.00 | 0.00 | C |
| ATOM | 4504 | O    | ARG | 287 | 52.285 | 46.164 | 33.553 | 1.00 | 0.00 | O |
| ATOM | 4505 | N    | PHE | 288 | 54.469 | 46.654 | 33.755 | 1.00 | 0.00 | N |
| ATOM | 4506 | H    | PHE | 288 | 55.224 | 47.232 | 33.411 | 1.00 | 0.00 | H |
| ATOM | 4507 | CA   | PHE | 288 | 54.853 | 45.408 | 34.435 | 1.00 | 0.00 | C |
| ATOM | 4508 | HA   | PHE | 288 | 53.984 | 44.984 | 34.940 | 1.00 | 0.00 | H |
| ATOM | 4509 | CB   | PHE | 288 | 55.325 | 44.429 | 33.342 | 1.00 | 0.00 | C |
| ATOM | 4510 | HB2  | PHE | 288 | 54.831 | 44.674 | 32.400 | 1.00 | 0.00 | H |
| ATOM | 4511 | HB3  | PHE | 288 | 56.389 | 44.579 | 33.174 | 1.00 | 0.00 | H |
| ATOM | 4512 | CG   | PHE | 288 | 55.083 | 42.957 | 33.599 | 1.00 | 0.00 | C |
| ATOM | 4513 | CD1  | PHE | 288 | 54.020 | 42.303 | 32.945 | 1.00 | 0.00 | C |
| ATOM | 4514 | HD1  | PHE | 288 | 53.350 | 42.860 | 32.305 | 1.00 | 0.00 | H |
| ATOM | 4515 | CE1  | PHE | 288 | 53.824 | 40.922 | 33.114 | 1.00 | 0.00 | C |
| ATOM | 4516 | HE1  | PHE | 288 | 53.003 | 40.425 | 32.617 | 1.00 | 0.00 | H |
| ATOM | 4517 | CZ   | PHE | 288 | 54.699 | 40.188 | 33.931 | 1.00 | 0.00 | C |
| ATOM | 4518 | HZ   | PHE | 288 | 54.553 | 39.124 | 34.057 | 1.00 | 0.00 | H |
| ATOM | 4519 | CE2  | PHE | 288 | 55.759 | 40.839 | 34.586 | 1.00 | 0.00 | C |
| ATOM | 4520 | HE2  | PHE | 288 | 56.426 | 40.269 | 35.215 | 1.00 | 0.00 | H |
| ATOM | 4521 | CD2  | PHE | 288 | 55.953 | 42.221 | 34.424 | 1.00 | 0.00 | C |

|      |      |          |     |        |        |        |      |      |   |
|------|------|----------|-----|--------|--------|--------|------|------|---|
| ATOM | 4522 | HD2 PHE  | 288 | 56.777 | 42.711 | 34.923 | 1.00 | 0.00 | H |
| ATOM | 4523 | C PHE    | 288 | 55.961 | 45.639 | 35.483 | 1.00 | 0.00 | C |
| ATOM | 4524 | O PHE    | 288 | 56.941 | 46.331 | 35.196 | 1.00 | 0.00 | O |
| ATOM | 4525 | N GLY    | 289 | 55.834 | 45.042 | 36.672 | 1.00 | 0.00 | N |
| ATOM | 4526 | H GLY    | 289 | 54.985 | 44.511 | 36.855 | 1.00 | 0.00 | H |
| ATOM | 4527 | CA GLY   | 289 | 56.782 | 45.153 | 37.788 | 1.00 | 0.00 | C |
| ATOM | 4528 | HA2 GLY  | 289 | 57.724 | 45.549 | 37.428 | 1.00 | 0.00 | H |
| ATOM | 4529 | HA3 GLY  | 289 | 56.397 | 45.857 | 38.523 | 1.00 | 0.00 | H |
| ATOM | 4530 | C GLY    | 289 | 57.023 | 43.822 | 38.510 | 1.00 | 0.00 | C |
| ATOM | 4531 | O GLY    | 289 | 56.078 | 43.056 | 38.711 | 1.00 | 0.00 | O |
| ATOM | 4532 | N ILE    | 290 | 58.273 | 43.537 | 38.908 | 1.00 | 0.00 | N |
| ATOM | 4533 | H ILE    | 290 | 59.008 | 44.191 | 38.663 | 1.00 | 0.00 | H |
| ATOM | 4534 | CA ILE   | 290 | 58.652 | 42.275 | 39.583 | 1.00 | 0.00 | C |
| ATOM | 4535 | HA ILE   | 290 | 57.739 | 41.838 | 39.985 | 1.00 | 0.00 | H |
| ATOM | 4536 | CB ILE   | 290 | 59.260 | 41.229 | 38.606 | 1.00 | 0.00 | C |
| ATOM | 4537 | HB ILE   | 290 | 60.301 | 41.505 | 38.433 | 1.00 | 0.00 | H |
| ATOM | 4538 | CG2 ILE  | 290 | 59.252 | 39.830 | 39.257 | 1.00 | 0.00 | C |
| ATOM | 4539 | HG21 ILE | 290 | 59.737 | 39.842 | 40.231 | 1.00 | 0.00 | H |
| ATOM | 4540 | HG22 ILE | 290 | 59.792 | 39.114 | 38.638 | 1.00 | 0.00 | H |
| ATOM | 4541 | HG23 ILE | 290 | 58.225 | 39.482 | 39.380 | 1.00 | 0.00 | H |
| ATOM | 4542 | CG1 ILE  | 290 | 58.563 | 41.176 | 37.226 | 1.00 | 0.00 | C |
| ATOM | 4543 | HG12 ILE | 290 | 57.512 | 40.915 | 37.358 | 1.00 | 0.00 | H |
| ATOM | 4544 | HG13 ILE | 290 | 58.614 | 42.160 | 36.761 | 1.00 | 0.00 | H |
| ATOM | 4545 | CD1 ILE  | 290 | 59.204 | 40.192 | 36.237 | 1.00 | 0.00 | C |
| ATOM | 4546 | HD11 ILE | 290 | 60.288 | 40.302 | 36.248 | 1.00 | 0.00 | H |
| ATOM | 4547 | HD12 ILE | 290 | 58.844 | 40.409 | 35.234 | 1.00 | 0.00 | H |
| ATOM | 4548 | HD13 ILE | 290 | 58.938 | 39.166 | 36.492 | 1.00 | 0.00 | H |
| ATOM | 4549 | C ILE    | 290 | 59.606 | 42.501 | 40.771 | 1.00 | 0.00 | C |
| ATOM | 4550 | O ILE    | 290 | 60.665 | 43.121 | 40.622 | 1.00 | 0.00 | O |
| ATOM | 4551 | N ASN    | 291 | 59.286 | 41.894 | 41.919 | 1.00 | 0.00 | N |
| ATOM | 4552 | H ASN    | 291 | 58.433 | 41.338 | 41.919 | 1.00 | 0.00 | H |
| ATOM | 4553 | CA ASN   | 291 | 60.156 | 41.763 | 43.096 | 1.00 | 0.00 | C |
| ATOM | 4554 | HA ASN   | 291 | 61.156 | 42.122 | 42.848 | 1.00 | 0.00 | H |
| ATOM | 4555 | CB ASN   | 291 | 59.615 | 42.619 | 44.257 | 1.00 | 0.00 | C |
| ATOM | 4556 | HB2 ASN  | 291 | 58.530 | 42.618 | 44.252 | 1.00 | 0.00 | H |
| ATOM | 4557 | HB3 ASN  | 291 | 59.929 | 42.202 | 45.213 | 1.00 | 0.00 | H |
| ATOM | 4558 | CG ASN   | 291 | 60.108 | 44.044 | 44.179 | 1.00 | 0.00 | C |
| ATOM | 4559 | OD1 ASN  | 291 | 59.619 | 44.865 | 43.429 | 1.00 | 0.00 | O |
| ATOM | 4560 | ND2 ASN  | 291 | 61.111 | 44.388 | 44.955 | 1.00 | 0.00 | N |
| ATOM | 4561 | HD21 ASN | 291 | 61.561 | 43.725 | 45.557 | 1.00 | 0.00 | H |
| ATOM | 4562 | HD22 ASN | 291 | 61.436 | 45.332 | 44.860 | 1.00 | 0.00 | H |
| ATOM | 4563 | C ASN    | 291 | 60.311 | 40.295 | 43.526 | 1.00 | 0.00 | C |
| ATOM | 4564 | O ASN    | 291 | 59.527 | 39.434 | 43.141 | 1.00 | 0.00 | O |
| ATOM | 4565 | N ALA    | 292 | 61.292 | 40.016 | 44.386 | 1.00 | 0.00 | N |
| ATOM | 4566 | H ALA    | 292 | 61.922 | 40.750 | 44.668 | 1.00 | 0.00 | H |
| ATOM | 4567 | CA ALA   | 292 | 61.432 | 38.732 | 45.069 | 1.00 | 0.00 | C |
| ATOM | 4568 | HA ALA   | 292 | 60.464 | 38.232 | 45.068 | 1.00 | 0.00 | H |
| ATOM | 4569 | CB ALA   | 292 | 62.423 | 37.845 | 44.303 | 1.00 | 0.00 | C |
| ATOM | 4570 | HB1 ALA  | 292 | 63.407 | 38.312 | 44.278 | 1.00 | 0.00 | H |
| ATOM | 4571 | HB2 ALA  | 292 | 62.071 | 37.698 | 43.281 | 1.00 | 0.00 | H |
| ATOM | 4572 | HB3 ALA  | 292 | 62.496 | 36.871 | 44.789 | 1.00 | 0.00 | H |
| ATOM | 4573 | C ALA    | 292 | 61.828 | 38.946 | 46.538 | 1.00 | 0.00 | C |

|      |      |     |     |     |        |        |        |      |      |   |
|------|------|-----|-----|-----|--------|--------|--------|------|------|---|
| ATOM | 4574 | O   | ALA | 292 | 62.544 | 39.901 | 46.858 | 1.00 | 0.00 | O |
| ATOM | 4575 | N   | GLY | 293 | 61.343 | 38.083 | 47.429 | 1.00 | 0.00 | N |
| ATOM | 4576 | H   | GLY | 293 | 60.737 | 37.334 | 47.100 | 1.00 | 0.00 | H |
| ATOM | 4577 | CA  | GLY | 293 | 61.498 | 38.229 | 48.878 | 1.00 | 0.00 | C |
| ATOM | 4578 | HA2 | GLY | 293 | 62.527 | 38.002 | 49.157 | 1.00 | 0.00 | H |
| ATOM | 4579 | HA3 | GLY | 293 | 61.282 | 39.258 | 49.166 | 1.00 | 0.00 | H |
| ATOM | 4580 | C   | GLY | 293 | 60.566 | 37.304 | 49.661 | 1.00 | 0.00 | C |
| ATOM | 4581 | O   | GLY | 293 | 59.837 | 36.507 | 49.077 | 1.00 | 0.00 | O |
| ATOM | 4582 | N   | ASP | 294 | 60.608 | 37.384 | 50.990 | 1.00 | 0.00 | N |
| ATOM | 4583 | H   | ASP | 294 | 61.195 | 38.078 | 51.424 | 1.00 | 0.00 | H |
| ATOM | 4584 | CA  | ASP | 294 | 59.771 | 36.555 | 51.867 | 1.00 | 0.00 | C |
| ATOM | 4585 | HA  | ASP | 294 | 59.830 | 35.530 | 51.506 | 1.00 | 0.00 | H |
| ATOM | 4586 | CB  | ASP | 294 | 60.347 | 36.575 | 53.296 | 1.00 | 0.00 | C |
| ATOM | 4587 | HB2 | ASP | 294 | 61.431 | 36.696 | 53.240 | 1.00 | 0.00 | H |
| ATOM | 4588 | HB3 | ASP | 294 | 59.944 | 37.432 | 53.839 | 1.00 | 0.00 | H |
| ATOM | 4589 | CG  | ASP | 294 | 60.065 | 35.287 | 54.081 | 1.00 | 0.00 | C |
| ATOM | 4590 | OD1 | ASP | 294 | 59.229 | 34.486 | 53.604 | 1.00 | 0.00 | O |
| ATOM | 4591 | OD2 | ASP | 294 | 60.700 | 35.112 | 55.148 | 1.00 | 0.00 | O |
| ATOM | 4592 | C   | ASP | 294 | 58.287 | 36.970 | 51.805 | 1.00 | 0.00 | C |
| ATOM | 4593 | O   | ASP | 294 | 57.965 | 38.140 | 51.551 | 1.00 | 0.00 | O |
| ATOM | 4594 | N   | CYS | 295 | 57.367 | 36.026 | 52.005 | 1.00 | 0.00 | N |
| ATOM | 4595 | H   | CYS | 295 | 57.693 | 35.088 | 52.238 | 1.00 | 0.00 | H |
| ATOM | 4596 | CA  | CYS | 295 | 55.924 | 36.266 | 51.988 | 1.00 | 0.00 | C |
| ATOM | 4597 | HA  | CYS | 295 | 55.765 | 37.228 | 52.453 | 1.00 | 0.00 | H |
| ATOM | 4598 | CB  | CYS | 295 | 55.417 | 36.353 | 50.538 | 1.00 | 0.00 | C |
| ATOM | 4599 | HB2 | CYS | 295 | 54.452 | 36.861 | 50.523 | 1.00 | 0.00 | H |
| ATOM | 4600 | HB3 | CYS | 295 | 56.119 | 36.932 | 49.936 | 1.00 | 0.00 | H |
| ATOM | 4601 | SG  | CYS | 295 | 55.217 | 34.704 | 49.811 | 1.00 | 0.00 | S |
| ATOM | 4602 | HG  | CYS | 295 | 56.446 | 34.248 | 50.119 | 1.00 | 0.00 | H |
| ATOM | 4603 | C   | CYS | 295 | 55.132 | 35.262 | 52.834 | 1.00 | 0.00 | C |
| ATOM | 4604 | O   | CYS | 295 | 55.550 | 34.127 | 53.051 | 1.00 | 0.00 | O |
| ATOM | 4605 | N   | MET | 296 | 53.968 | 35.690 | 53.324 | 1.00 | 0.00 | N |
| ATOM | 4606 | H   | MET | 296 | 53.676 | 36.644 | 53.145 | 1.00 | 0.00 | H |
| ATOM | 4607 | CA  | MET | 296 | 53.080 | 34.869 | 54.142 | 1.00 | 0.00 | C |
| ATOM | 4608 | HA  | MET | 296 | 53.658 | 34.059 | 54.591 | 1.00 | 0.00 | H |
| ATOM | 4609 | CB  | MET | 296 | 52.545 | 35.749 | 55.279 | 1.00 | 0.00 | C |
| ATOM | 4610 | HB2 | MET | 296 | 53.367 | 36.369 | 55.633 | 1.00 | 0.00 | H |
| ATOM | 4611 | HB3 | MET | 296 | 51.759 | 36.414 | 54.920 | 1.00 | 0.00 | H |
| ATOM | 4612 | CG  | MET | 296 | 52.022 | 34.924 | 56.454 | 1.00 | 0.00 | C |
| ATOM | 4613 | HG2 | MET | 296 | 51.067 | 34.479 | 56.174 | 1.00 | 0.00 | H |
| ATOM | 4614 | HG3 | MET | 296 | 52.726 | 34.119 | 56.668 | 1.00 | 0.00 | H |
| ATOM | 4615 | SD  | MET | 296 | 51.801 | 35.893 | 57.969 | 1.00 | 0.00 | S |
| ATOM | 4616 | CE  | MET | 296 | 53.521 | 36.347 | 58.357 | 1.00 | 0.00 | C |
| ATOM | 4617 | HE1 | MET | 296 | 53.898 | 37.062 | 57.625 | 1.00 | 0.00 | H |
| ATOM | 4618 | HE2 | MET | 296 | 53.564 | 36.811 | 59.342 | 1.00 | 0.00 | H |
| ATOM | 4619 | HE3 | MET | 296 | 54.150 | 35.458 | 58.355 | 1.00 | 0.00 | H |
| ATOM | 4620 | C   | MET | 296 | 51.987 | 34.247 | 53.267 | 1.00 | 0.00 | C |
| ATOM | 4621 | O   | MET | 296 | 50.989 | 34.896 | 52.952 | 1.00 | 0.00 | O |
| ATOM | 4622 | N   | VAL | 297 | 52.209 | 33.010 | 52.823 | 1.00 | 0.00 | N |
| ATOM | 4623 | H   | VAL | 297 | 53.060 | 32.547 | 53.130 | 1.00 | 0.00 | H |
| ATOM | 4624 | CA  | VAL | 297 | 51.274 | 32.229 | 51.995 | 1.00 | 0.00 | C |
| ATOM | 4625 | HA  | VAL | 297 | 50.782 | 32.896 | 51.291 | 1.00 | 0.00 | H |

|      |      |      |     |     |        |        |        |      |      |   |
|------|------|------|-----|-----|--------|--------|--------|------|------|---|
| ATOM | 4626 | CB   | VAL | 297 | 52.018 | 31.141 | 51.190 | 1.00 | 0.00 | C |
| ATOM | 4627 | HB   | VAL | 297 | 52.409 | 30.395 | 51.881 | 1.00 | 0.00 | H |
| ATOM | 4628 | CG1  | VAL | 297 | 51.078 | 30.432 | 50.205 | 1.00 | 0.00 | C |
| ATOM | 4629 | HG11 | VAL | 297 | 51.635 | 29.697 | 49.624 | 1.00 | 0.00 | H |
| ATOM | 4630 | HG12 | VAL | 297 | 50.289 | 29.907 | 50.744 | 1.00 | 0.00 | H |
| ATOM | 4631 | HG13 | VAL | 297 | 50.629 | 31.159 | 49.528 | 1.00 | 0.00 | H |
| ATOM | 4632 | CG2  | VAL | 297 | 53.207 | 31.697 | 50.394 | 1.00 | 0.00 | C |
| ATOM | 4633 | HG21 | VAL | 297 | 53.677 | 30.901 | 49.817 | 1.00 | 0.00 | H |
| ATOM | 4634 | HG22 | VAL | 297 | 53.957 | 32.109 | 51.070 | 1.00 | 0.00 | H |
| ATOM | 4635 | HG23 | VAL | 297 | 52.872 | 32.480 | 49.715 | 1.00 | 0.00 | H |
| ATOM | 4636 | C    | VAL | 297 | 50.214 | 31.577 | 52.883 | 1.00 | 0.00 | C |
| ATOM | 4637 | O    | VAL | 297 | 50.574 | 30.914 | 53.856 | 1.00 | 0.00 | O |
| ATOM | 4638 | N    | GLY | 298 | 48.925 | 31.702 | 52.557 | 1.00 | 0.00 | N |
| ATOM | 4639 | H    | GLY | 298 | 48.664 | 32.281 | 51.762 | 1.00 | 0.00 | H |
| ATOM | 4640 | CA   | GLY | 298 | 47.870 | 31.005 | 53.297 | 1.00 | 0.00 | C |
| ATOM | 4641 | HA2  | GLY | 298 | 47.922 | 29.943 | 53.061 | 1.00 | 0.00 | H |
| ATOM | 4642 | HA3  | GLY | 298 | 48.065 | 31.116 | 54.364 | 1.00 | 0.00 | H |
| ATOM | 4643 | C    | GLY | 298 | 46.440 | 31.481 | 53.040 | 1.00 | 0.00 | C |
| ATOM | 4644 | O    | GLY | 298 | 46.154 | 32.227 | 52.101 | 1.00 | 0.00 | O |
| ATOM | 4645 | N    | VAL | 299 | 45.541 | 31.012 | 53.910 | 1.00 | 0.00 | N |
| ATOM | 4646 | H    | VAL | 299 | 45.883 | 30.425 | 54.655 | 1.00 | 0.00 | H |
| ATOM | 4647 | CA   | VAL | 299 | 44.141 | 31.446 | 54.013 | 1.00 | 0.00 | C |
| ATOM | 4648 | HA   | VAL | 299 | 43.696 | 31.421 | 53.022 | 1.00 | 0.00 | H |
| ATOM | 4649 | CB   | VAL | 299 | 43.350 | 30.485 | 54.929 | 1.00 | 0.00 | C |
| ATOM | 4650 | HB   | VAL | 299 | 43.865 | 30.408 | 55.888 | 1.00 | 0.00 | H |
| ATOM | 4651 | CG1  | VAL | 299 | 41.915 | 30.953 | 55.196 | 1.00 | 0.00 | C |
| ATOM | 4652 | HG11 | VAL | 299 | 41.393 | 31.113 | 54.255 | 1.00 | 0.00 | H |
| ATOM | 4653 | HG12 | VAL | 299 | 41.385 | 30.203 | 55.785 | 1.00 | 0.00 | H |
| ATOM | 4654 | HG13 | VAL | 299 | 41.920 | 31.879 | 55.773 | 1.00 | 0.00 | H |
| ATOM | 4655 | CG2  | VAL | 299 | 43.269 | 29.080 | 54.315 | 1.00 | 0.00 | C |
| ATOM | 4656 | HG21 | VAL | 299 | 44.267 | 28.669 | 54.167 | 1.00 | 0.00 | H |
| ATOM | 4657 | HG22 | VAL | 299 | 42.742 | 29.117 | 53.362 | 1.00 | 0.00 | H |
| ATOM | 4658 | HG23 | VAL | 299 | 42.732 | 28.413 | 54.991 | 1.00 | 0.00 | H |
| ATOM | 4659 | C    | VAL | 299 | 44.061 | 32.881 | 54.551 | 1.00 | 0.00 | C |
| ATOM | 4660 | O    | VAL | 299 | 44.784 | 33.225 | 55.484 | 1.00 | 0.00 | O |
| ATOM | 4661 | N    | PHE | 300 | 43.165 | 33.696 | 53.989 | 1.00 | 0.00 | N |
| ATOM | 4662 | H    | PHE | 300 | 42.668 | 33.358 | 53.174 | 1.00 | 0.00 | H |
| ATOM | 4663 | CA   | PHE | 300 | 42.875 | 35.054 | 54.462 | 1.00 | 0.00 | C |
| ATOM | 4664 | HA   | PHE | 300 | 42.961 | 35.076 | 55.551 | 1.00 | 0.00 | H |
| ATOM | 4665 | CB   | PHE | 300 | 43.927 | 36.016 | 53.876 | 1.00 | 0.00 | C |
| ATOM | 4666 | HB2  | PHE | 300 | 44.857 | 35.899 | 54.434 | 1.00 | 0.00 | H |
| ATOM | 4667 | HB3  | PHE | 300 | 44.129 | 35.715 | 52.847 | 1.00 | 0.00 | H |
| ATOM | 4668 | CG   | PHE | 300 | 43.551 | 37.491 | 53.868 | 1.00 | 0.00 | C |
| ATOM | 4669 | CD1  | PHE | 300 | 43.130 | 38.134 | 55.049 | 1.00 | 0.00 | C |
| ATOM | 4670 | HD1  | PHE | 300 | 43.072 | 37.584 | 55.978 | 1.00 | 0.00 | H |
| ATOM | 4671 | CE1  | PHE | 300 | 42.783 | 39.497 | 55.024 | 1.00 | 0.00 | C |
| ATOM | 4672 | HE1  | PHE | 300 | 42.450 | 39.988 | 55.928 | 1.00 | 0.00 | H |
| ATOM | 4673 | CZ   | PHE | 300 | 42.900 | 40.233 | 53.833 | 1.00 | 0.00 | C |
| ATOM | 4674 | HZ   | PHE | 300 | 42.683 | 41.294 | 53.825 | 1.00 | 0.00 | H |
| ATOM | 4675 | CE2  | PHE | 300 | 43.309 | 39.595 | 52.652 | 1.00 | 0.00 | C |
| ATOM | 4676 | HE2  | PHE | 300 | 43.405 | 40.170 | 51.743 | 1.00 | 0.00 | H |
| ATOM | 4677 | CD2  | PHE | 300 | 43.618 | 38.224 | 52.666 | 1.00 | 0.00 | C |

|      |      |         |     |        |        |        |      |      |   |
|------|------|---------|-----|--------|--------|--------|------|------|---|
| ATOM | 4678 | HD2 PHE | 300 | 43.941 | 37.742 | 51.756 | 1.00 | 0.00 | H |
| ATOM | 4679 | C PHE   | 300 | 41.452 | 35.509 | 54.097 | 1.00 | 0.00 | C |
| ATOM | 4680 | O PHE   | 300 | 41.101 | 35.590 | 52.913 | 1.00 | 0.00 | O |
| ATOM | 4681 | N GLY   | 301 | 40.647 | 35.873 | 55.097 | 1.00 | 0.00 | N |
| ATOM | 4682 | H GLY   | 301 | 40.913 | 35.621 | 56.052 | 1.00 | 0.00 | H |
| ATOM | 4683 | CA GLY  | 301 | 39.471 | 36.727 | 54.921 | 1.00 | 0.00 | C |
| ATOM | 4684 | HA2 GLY | 301 | 39.823 | 37.734 | 54.715 | 1.00 | 0.00 | H |
| ATOM | 4685 | HA3 GLY | 301 | 38.891 | 36.391 | 54.065 | 1.00 | 0.00 | H |
| ATOM | 4686 | C GLY   | 301 | 38.554 | 36.804 | 56.144 | 1.00 | 0.00 | C |
| ATOM | 4687 | O GLY   | 301 | 39.015 | 36.856 | 57.279 | 1.00 | 0.00 | O |
| ATOM | 4688 | N CYS   | 302 | 37.242 | 36.819 | 55.901 | 1.00 | 0.00 | N |
| ATOM | 4689 | H CYS   | 302 | 36.948 | 36.729 | 54.936 | 1.00 | 0.00 | H |
| ATOM | 4690 | CA CYS  | 302 | 36.204 | 36.662 | 56.924 | 1.00 | 0.00 | C |
| ATOM | 4691 | HA CYS  | 302 | 36.621 | 36.874 | 57.912 | 1.00 | 0.00 | H |
| ATOM | 4692 | CB CYS  | 302 | 35.084 | 37.677 | 56.632 | 1.00 | 0.00 | C |
| ATOM | 4693 | HB2 CYS | 302 | 35.475 | 38.671 | 56.837 | 1.00 | 0.00 | H |
| ATOM | 4694 | HB3 CYS | 302 | 34.807 | 37.612 | 55.579 | 1.00 | 0.00 | H |
| ATOM | 4695 | SG CYS  | 302 | 33.594 | 37.436 | 57.645 | 1.00 | 0.00 | S |
| ATOM | 4696 | HG CYS  | 302 | 33.087 | 38.670 | 57.494 | 1.00 | 0.00 | H |
| ATOM | 4697 | C CYS   | 302 | 35.684 | 35.217 | 56.926 | 1.00 | 0.00 | C |
| ATOM | 4698 | O CYS   | 302 | 35.627 | 34.579 | 55.876 | 1.00 | 0.00 | O |
| ATOM | 4699 | N SER   | 303 | 35.188 | 34.724 | 58.064 | 1.00 | 0.00 | N |
| ATOM | 4700 | H SER   | 303 | 35.293 | 35.260 | 58.914 | 1.00 | 0.00 | H |
| ATOM | 4701 | CA SER  | 303 | 34.598 | 33.380 | 58.191 | 1.00 | 0.00 | C |
| ATOM | 4702 | HA SER  | 303 | 35.363 | 32.651 | 57.918 | 1.00 | 0.00 | H |
| ATOM | 4703 | CB SER  | 303 | 34.207 | 33.114 | 59.650 | 1.00 | 0.00 | C |
| ATOM | 4704 | HB2 SER | 303 | 33.336 | 33.717 | 59.911 | 1.00 | 0.00 | H |
| ATOM | 4705 | HB3 SER | 303 | 33.953 | 32.060 | 59.761 | 1.00 | 0.00 | H |
| ATOM | 4706 | OG SER  | 303 | 35.275 | 33.434 | 60.528 | 1.00 | 0.00 | O |
| ATOM | 4707 | HG SER  | 303 | 35.058 | 33.079 | 61.400 | 1.00 | 0.00 | H |
| ATOM | 4708 | C SER   | 303 | 33.381 | 33.111 | 57.279 | 1.00 | 0.00 | C |
| ATOM | 4709 | O SER   | 303 | 32.972 | 31.957 | 57.149 | 1.00 | 0.00 | O |
| ATOM | 4710 | N LYS   | 304 | 32.791 | 34.142 | 56.644 | 1.00 | 0.00 | N |
| ATOM | 4711 | H LYS   | 304 | 33.134 | 35.066 | 56.867 | 1.00 | 0.00 | H |
| ATOM | 4712 | CA LYS  | 304 | 31.820 | 33.999 | 55.533 | 1.00 | 0.00 | C |
| ATOM | 4713 | HA LYS  | 304 | 31.159 | 33.151 | 55.730 | 1.00 | 0.00 | H |
| ATOM | 4714 | CB LYS  | 304 | 30.960 | 35.275 | 55.386 | 1.00 | 0.00 | C |
| ATOM | 4715 | HB2 LYS | 304 | 31.615 | 36.130 | 55.206 | 1.00 | 0.00 | H |
| ATOM | 4716 | HB3 LYS | 304 | 30.333 | 35.147 | 54.502 | 1.00 | 0.00 | H |
| ATOM | 4717 | CG LYS  | 304 | 30.036 | 35.603 | 56.573 | 1.00 | 0.00 | C |
| ATOM | 4718 | HG2 LYS | 304 | 29.439 | 34.723 | 56.818 | 1.00 | 0.00 | H |
| ATOM | 4719 | HG3 LYS | 304 | 30.640 | 35.872 | 57.440 | 1.00 | 0.00 | H |
| ATOM | 4720 | CD LYS  | 304 | 29.091 | 36.772 | 56.219 | 1.00 | 0.00 | C |
| ATOM | 4721 | HD2 LYS | 304 | 29.683 | 37.642 | 55.927 | 1.00 | 0.00 | H |
| ATOM | 4722 | HD3 LYS | 304 | 28.465 | 36.474 | 55.376 | 1.00 | 0.00 | H |
| ATOM | 4723 | CE LYS  | 304 | 28.190 | 37.154 | 57.402 | 1.00 | 0.00 | C |
| ATOM | 4724 | HE2 LYS | 304 | 27.694 | 36.251 | 57.770 | 1.00 | 0.00 | H |
| ATOM | 4725 | HE3 LYS | 304 | 28.814 | 37.547 | 58.210 | 1.00 | 0.00 | H |
| ATOM | 4726 | NZ LYS  | 304 | 27.161 | 38.162 | 57.032 | 1.00 | 0.00 | N |
| ATOM | 4727 | HZ1 LYS | 304 | 27.538 | 39.053 | 56.703 | 1.00 | 0.00 | H |
| ATOM | 4728 | HZ2 LYS | 304 | 26.609 | 38.443 | 57.839 | 1.00 | 0.00 | H |
| ATOM | 4729 | HZ3 LYS | 304 | 26.522 | 37.843 | 56.308 | 1.00 | 0.00 | H |

|      |      |      |     |     |        |        |        |      |      |   |
|------|------|------|-----|-----|--------|--------|--------|------|------|---|
| ATOM | 4730 | C    | LYS | 304 | 32.498 | 33.717 | 54.179 | 1.00 | 0.00 | C |
| ATOM | 4731 | O    | LYS | 304 | 32.026 | 32.888 | 53.402 | 1.00 | 0.00 | O |
| ATOM | 4732 | N    | LYS | 305 | 33.584 | 34.441 | 53.882 | 1.00 | 0.00 | N |
| ATOM | 4733 | H    | LYS | 305 | 34.005 | 34.953 | 54.647 | 1.00 | 0.00 | H |
| ATOM | 4734 | CA   | LYS | 305 | 34.260 | 34.521 | 52.578 | 1.00 | 0.00 | C |
| ATOM | 4735 | HA   | LYS | 305 | 34.156 | 33.559 | 52.074 | 1.00 | 0.00 | H |
| ATOM | 4736 | CB   | LYS | 305 | 33.561 | 35.587 | 51.699 | 1.00 | 0.00 | C |
| ATOM | 4737 | HB2  | LYS | 305 | 32.627 | 35.164 | 51.323 | 1.00 | 0.00 | H |
| ATOM | 4738 | HB3  | LYS | 305 | 33.302 | 36.440 | 52.328 | 1.00 | 0.00 | H |
| ATOM | 4739 | CG   | LYS | 305 | 34.368 | 36.138 | 50.505 | 1.00 | 0.00 | C |
| ATOM | 4740 | HG2  | LYS | 305 | 33.735 | 36.838 | 49.958 | 1.00 | 0.00 | H |
| ATOM | 4741 | HG3  | LYS | 305 | 35.204 | 36.715 | 50.902 | 1.00 | 0.00 | H |
| ATOM | 4742 | CD   | LYS | 305 | 34.908 | 35.095 | 49.511 | 1.00 | 0.00 | C |
| ATOM | 4743 | HD2  | LYS | 305 | 35.345 | 34.256 | 50.047 | 1.00 | 0.00 | H |
| ATOM | 4744 | HD3  | LYS | 305 | 34.098 | 34.724 | 48.879 | 1.00 | 0.00 | H |
| ATOM | 4745 | CE   | LYS | 305 | 35.994 | 35.762 | 48.655 | 1.00 | 0.00 | C |
| ATOM | 4746 | HE2  | LYS | 305 | 35.527 | 36.442 | 47.936 | 1.00 | 0.00 | H |
| ATOM | 4747 | HE3  | LYS | 305 | 36.636 | 36.351 | 49.315 | 1.00 | 0.00 | H |
| ATOM | 4748 | NZ   | LYS | 305 | 36.842 | 34.779 | 47.948 | 1.00 | 0.00 | N |
| ATOM | 4749 | HZ1  | LYS | 305 | 37.142 | 34.039 | 48.575 | 1.00 | 0.00 | H |
| ATOM | 4750 | HZ2  | LYS | 305 | 37.685 | 35.238 | 47.616 | 1.00 | 0.00 | H |
| ATOM | 4751 | HZ3  | LYS | 305 | 36.370 | 34.389 | 47.131 | 1.00 | 0.00 | H |
| ATOM | 4752 | C    | LYS | 305 | 35.753 | 34.791 | 52.790 | 1.00 | 0.00 | C |
| ATOM | 4753 | O    | LYS | 305 | 36.161 | 35.881 | 53.195 | 1.00 | 0.00 | O |
| ATOM | 4754 | N    | LEU | 306 | 36.548 | 33.780 | 52.450 | 1.00 | 0.00 | N |
| ATOM | 4755 | H    | LEU | 306 | 36.101 | 32.935 | 52.135 | 1.00 | 0.00 | H |
| ATOM | 4756 | CA   | LEU | 306 | 38.007 | 33.761 | 52.520 | 1.00 | 0.00 | C |
| ATOM | 4757 | HA   | LEU | 306 | 38.353 | 34.725 | 52.889 | 1.00 | 0.00 | H |
| ATOM | 4758 | CB   | LEU | 306 | 38.440 | 32.703 | 53.561 | 1.00 | 0.00 | C |
| ATOM | 4759 | HB2  | LEU | 306 | 39.524 | 32.730 | 53.676 | 1.00 | 0.00 | H |
| ATOM | 4760 | HB3  | LEU | 306 | 38.020 | 33.018 | 54.518 | 1.00 | 0.00 | H |
| ATOM | 4761 | CG   | LEU | 306 | 37.993 | 31.245 | 53.298 | 1.00 | 0.00 | C |
| ATOM | 4762 | HG   | LEU | 306 | 36.952 | 31.233 | 52.977 | 1.00 | 0.00 | H |
| ATOM | 4763 | CD1  | LEU | 306 | 38.837 | 30.534 | 52.236 | 1.00 | 0.00 | C |
| ATOM | 4764 | HD11 | LEU | 306 | 38.658 | 30.965 | 51.254 | 1.00 | 0.00 | H |
| ATOM | 4765 | HD12 | LEU | 306 | 38.555 | 29.483 | 52.191 | 1.00 | 0.00 | H |
| ATOM | 4766 | HD13 | LEU | 306 | 39.896 | 30.607 | 52.482 | 1.00 | 0.00 | H |
| ATOM | 4767 | CD2  | LEU | 306 | 38.081 | 30.434 | 54.589 | 1.00 | 0.00 | C |
| ATOM | 4768 | HD21 | LEU | 306 | 39.106 | 30.400 | 54.954 | 1.00 | 0.00 | H |
| ATOM | 4769 | HD22 | LEU | 306 | 37.453 | 30.887 | 55.358 | 1.00 | 0.00 | H |
| ATOM | 4770 | HD23 | LEU | 306 | 37.726 | 29.417 | 54.421 | 1.00 | 0.00 | H |
| ATOM | 4771 | C    | LEU | 306 | 38.638 | 33.589 | 51.130 | 1.00 | 0.00 | C |
| ATOM | 4772 | O    | LEU | 306 | 37.955 | 33.359 | 50.128 | 1.00 | 0.00 | O |
| ATOM | 4773 | N    | ASN | 307 | 39.958 | 33.719 | 51.082 | 1.00 | 0.00 | N |
| ATOM | 4774 | H    | ASN | 307 | 40.432 | 33.954 | 51.948 | 1.00 | 0.00 | H |
| ATOM | 4775 | CA   | ASN | 307 | 40.810 | 33.627 | 49.900 | 1.00 | 0.00 | C |
| ATOM | 4776 | HA   | ASN | 307 | 40.263 | 33.144 | 49.088 | 1.00 | 0.00 | H |
| ATOM | 4777 | CB   | ASN | 307 | 41.214 | 35.053 | 49.469 | 1.00 | 0.00 | C |
| ATOM | 4778 | HB2  | ASN | 307 | 41.983 | 35.423 | 50.148 | 1.00 | 0.00 | H |
| ATOM | 4779 | HB3  | ASN | 307 | 41.638 | 35.027 | 48.466 | 1.00 | 0.00 | H |
| ATOM | 4780 | CG   | ASN | 307 | 40.061 | 36.045 | 49.475 | 1.00 | 0.00 | C |
| ATOM | 4781 | OD1  | ASN | 307 | 39.261 | 36.110 | 48.553 | 1.00 | 0.00 | O |

|      |      |      |     |     |        |        |        |      |      |   |
|------|------|------|-----|-----|--------|--------|--------|------|------|---|
| ATOM | 4782 | ND2  | ASN | 307 | 39.915 | 36.815 | 50.530 | 1.00 | 0.00 | N |
| ATOM | 4783 | HD21 | ASN | 307 | 40.502 | 36.661 | 51.346 | 1.00 | 0.00 | H |
| ATOM | 4784 | HD22 | ASN | 307 | 39.184 | 37.501 | 50.524 | 1.00 | 0.00 | H |
| ATOM | 4785 | C    | ASN | 307 | 42.044 | 32.772 | 50.242 | 1.00 | 0.00 | C |
| ATOM | 4786 | O    | ASN | 307 | 42.346 | 32.593 | 51.421 | 1.00 | 0.00 | O |
| ATOM | 4787 | N    | TYR | 308 | 42.782 | 32.292 | 49.237 | 1.00 | 0.00 | N |
| ATOM | 4788 | H    | TYR | 308 | 42.490 | 32.458 | 48.287 | 1.00 | 0.00 | H |
| ATOM | 4789 | CA   | TYR | 308 | 44.099 | 31.670 | 49.435 | 1.00 | 0.00 | C |
| ATOM | 4790 | HA   | TYR | 308 | 44.390 | 31.776 | 50.479 | 1.00 | 0.00 | H |
| ATOM | 4791 | CB   | TYR | 308 | 44.038 | 30.167 | 49.142 | 1.00 | 0.00 | C |
| ATOM | 4792 | HB2  | TYR | 308 | 43.152 | 29.750 | 49.624 | 1.00 | 0.00 | H |
| ATOM | 4793 | HB3  | TYR | 308 | 43.930 | 30.005 | 48.069 | 1.00 | 0.00 | H |
| ATOM | 4794 | CG   | TYR | 308 | 45.253 | 29.412 | 49.650 | 1.00 | 0.00 | C |
| ATOM | 4795 | CD1  | TYR | 308 | 46.381 | 29.224 | 48.828 | 1.00 | 0.00 | C |
| ATOM | 4796 | HD1  | TYR | 308 | 46.391 | 29.619 | 47.822 | 1.00 | 0.00 | H |
| ATOM | 4797 | CE1  | TYR | 308 | 47.496 | 28.511 | 49.314 | 1.00 | 0.00 | C |
| ATOM | 4798 | HE1  | TYR | 308 | 48.363 | 28.351 | 48.691 | 1.00 | 0.00 | H |
| ATOM | 4799 | CZ   | TYR | 308 | 47.484 | 27.980 | 50.622 | 1.00 | 0.00 | C |
| ATOM | 4800 | OH   | TYR | 308 | 48.544 | 27.258 | 51.072 | 1.00 | 0.00 | O |
| ATOM | 4801 | HH   | TYR | 308 | 48.291 | 26.624 | 51.760 | 1.00 | 0.00 | H |
| ATOM | 4802 | CE2  | TYR | 308 | 46.364 | 28.194 | 51.453 | 1.00 | 0.00 | C |
| ATOM | 4803 | HE2  | TYR | 308 | 46.363 | 27.815 | 52.461 | 1.00 | 0.00 | H |
| ATOM | 4804 | CD2  | TYR | 308 | 45.254 | 28.909 | 50.965 | 1.00 | 0.00 | C |
| ATOM | 4805 | HD2  | TYR | 308 | 44.396 | 29.071 | 51.601 | 1.00 | 0.00 | H |
| ATOM | 4806 | C    | TYR | 308 | 45.140 | 32.404 | 48.585 | 1.00 | 0.00 | C |
| ATOM | 4807 | O    | TYR | 308 | 45.042 | 32.421 | 47.354 | 1.00 | 0.00 | O |
| ATOM | 4808 | N    | THR | 309 | 46.087 | 33.080 | 49.232 | 1.00 | 0.00 | N |
| ATOM | 4809 | H    | THR | 309 | 46.181 | 32.938 | 50.237 | 1.00 | 0.00 | H |
| ATOM | 4810 | CA   | THR | 309 | 46.954 | 34.096 | 48.606 | 1.00 | 0.00 | C |
| ATOM | 4811 | HA   | THR | 309 | 47.196 | 33.775 | 47.594 | 1.00 | 0.00 | H |
| ATOM | 4812 | CB   | THR | 309 | 46.172 | 35.426 | 48.496 | 1.00 | 0.00 | C |
| ATOM | 4813 | HB   | THR | 309 | 45.184 | 35.209 | 48.089 | 1.00 | 0.00 | H |
| ATOM | 4814 | CG2  | THR | 309 | 45.979 | 36.157 | 49.826 | 1.00 | 0.00 | C |
| ATOM | 4815 | HG21 | THR | 309 | 45.363 | 37.042 | 49.665 | 1.00 | 0.00 | H |
| ATOM | 4816 | HG22 | THR | 309 | 46.937 | 36.469 | 50.238 | 1.00 | 0.00 | H |
| ATOM | 4817 | HG23 | THR | 309 | 45.478 | 35.504 | 50.541 | 1.00 | 0.00 | H |
| ATOM | 4818 | OG1  | THR | 309 | 46.806 | 36.314 | 47.600 | 1.00 | 0.00 | O |
| ATOM | 4819 | HG1  | THR | 309 | 46.331 | 36.251 | 46.762 | 1.00 | 0.00 | H |
| ATOM | 4820 | C    | THR | 309 | 48.290 | 34.224 | 49.357 | 1.00 | 0.00 | C |
| ATOM | 4821 | O    | THR | 309 | 48.600 | 33.389 | 50.206 | 1.00 | 0.00 | O |
| ATOM | 4822 | N    | ALA | 310 | 49.101 | 35.237 | 49.040 | 1.00 | 0.00 | N |
| ATOM | 4823 | H    | ALA | 310 | 48.771 | 35.914 | 48.363 | 1.00 | 0.00 | H |
| ATOM | 4824 | CA   | ALA | 310 | 50.395 | 35.493 | 49.674 | 1.00 | 0.00 | C |
| ATOM | 4825 | HA   | ALA | 310 | 50.453 | 34.934 | 50.605 | 1.00 | 0.00 | H |
| ATOM | 4826 | CB   | ALA | 310 | 51.502 | 34.983 | 48.745 | 1.00 | 0.00 | C |
| ATOM | 4827 | HB1  | ALA | 310 | 51.489 | 35.541 | 47.808 | 1.00 | 0.00 | H |
| ATOM | 4828 | HB2  | ALA | 310 | 51.353 | 33.924 | 48.536 | 1.00 | 0.00 | H |
| ATOM | 4829 | HB3  | ALA | 310 | 52.468 | 35.120 | 49.226 | 1.00 | 0.00 | H |
| ATOM | 4830 | C    | ALA | 310 | 50.564 | 36.981 | 50.012 | 1.00 | 0.00 | C |
| ATOM | 4831 | O    | ALA | 310 | 50.348 | 37.827 | 49.147 | 1.00 | 0.00 | O |
| ATOM | 4832 | N    | ILE | 311 | 50.927 | 37.313 | 51.256 | 1.00 | 0.00 | N |
| ATOM | 4833 | H    | ILE | 311 | 51.059 | 36.563 | 51.931 | 1.00 | 0.00 | H |



|      |      |      |     |     |        |        |        |      |      |   |
|------|------|------|-----|-----|--------|--------|--------|------|------|---|
| ATOM | 4834 | CA   | ILE | 311 | 50.938 | 38.697 | 51.765 | 1.00 | 0.00 | C |
| ATOM | 4835 | HA   | ILE | 311 | 50.792 | 39.384 | 50.933 | 1.00 | 0.00 | H |
| ATOM | 4836 | CB   | ILE | 311 | 49.768 | 38.922 | 52.760 | 1.00 | 0.00 | C |
| ATOM | 4837 | HB   | ILE | 311 | 49.882 | 38.216 | 53.585 | 1.00 | 0.00 | H |
| ATOM | 4838 | CG2  | ILE | 311 | 49.801 | 40.349 | 53.347 | 1.00 | 0.00 | C |
| ATOM | 4839 | HG21 | ILE | 311 | 50.733 | 40.525 | 53.884 | 1.00 | 0.00 | H |
| ATOM | 4840 | HG22 | ILE | 311 | 48.994 | 40.485 | 54.066 | 1.00 | 0.00 | H |
| ATOM | 4841 | HG23 | ILE | 311 | 49.696 | 41.087 | 52.553 | 1.00 | 0.00 | H |
| ATOM | 4842 | CG1  | ILE | 311 | 48.412 | 38.643 | 52.069 | 1.00 | 0.00 | C |
| ATOM | 4843 | HG12 | ILE | 311 | 48.285 | 39.328 | 51.233 | 1.00 | 0.00 | H |
| ATOM | 4844 | HG13 | ILE | 311 | 48.417 | 37.629 | 51.673 | 1.00 | 0.00 | H |
| ATOM | 4845 | CD1  | ILE | 311 | 47.184 | 38.735 | 52.979 | 1.00 | 0.00 | C |
| ATOM | 4846 | HD11 | ILE | 311 | 47.313 | 38.080 | 53.841 | 1.00 | 0.00 | H |
| ATOM | 4847 | HD12 | ILE | 311 | 46.311 | 38.408 | 52.418 | 1.00 | 0.00 | H |
| ATOM | 4848 | HD13 | ILE | 311 | 47.016 | 39.760 | 53.309 | 1.00 | 0.00 | H |
| ATOM | 4849 | C    | ILE | 311 | 52.292 | 39.040 | 52.391 | 1.00 | 0.00 | C |
| ATOM | 4850 | O    | ILE | 311 | 52.753 | 38.327 | 53.281 | 1.00 | 0.00 | O |
| ATOM | 4851 | N    | SER | 312 | 52.923 | 40.133 | 51.945 | 1.00 | 0.00 | N |
| ATOM | 4852 | H    | SER | 312 | 52.513 | 40.634 | 51.170 | 1.00 | 0.00 | H |
| ATOM | 4853 | CA   | SER | 312 | 54.068 | 40.782 | 52.612 | 1.00 | 0.00 | C |
| ATOM | 4854 | HA   | SER | 312 | 53.789 | 41.026 | 53.638 | 1.00 | 0.00 | H |
| ATOM | 4855 | CB   | SER | 312 | 55.301 | 39.863 | 52.653 | 1.00 | 0.00 | C |
| ATOM | 4856 | HB2  | SER | 312 | 56.087 | 40.332 | 53.247 | 1.00 | 0.00 | H |
| ATOM | 4857 | HB3  | SER | 312 | 55.048 | 38.936 | 53.156 | 1.00 | 0.00 | H |
| ATOM | 4858 | OG   | SER | 312 | 55.804 | 39.615 | 51.352 | 1.00 | 0.00 | O |
| ATOM | 4859 | HG   | SER | 312 | 56.591 | 39.034 | 51.447 | 1.00 | 0.00 | H |
| ATOM | 4860 | C    | SER | 312 | 54.498 | 42.076 | 51.913 | 1.00 | 0.00 | C |
| ATOM | 4861 | O    | SER | 312 | 54.014 | 42.432 | 50.833 | 1.00 | 0.00 | O |
| ATOM | 4862 | N    | ASP | 313 | 55.511 | 42.720 | 52.498 | 1.00 | 0.00 | N |
| ATOM | 4863 | H    | ASP | 313 | 55.805 | 42.409 | 53.413 | 1.00 | 0.00 | H |
| ATOM | 4864 | CA   | ASP | 313 | 56.266 | 43.830 | 51.919 | 1.00 | 0.00 | C |
| ATOM | 4865 | HA   | ASP | 313 | 55.586 | 44.671 | 51.835 | 1.00 | 0.00 | H |
| ATOM | 4866 | CB   | ASP | 313 | 57.367 | 44.211 | 52.924 | 1.00 | 0.00 | C |
| ATOM | 4867 | HB2  | ASP | 313 | 56.945 | 44.224 | 53.930 | 1.00 | 0.00 | H |
| ATOM | 4868 | HB3  | ASP | 313 | 58.161 | 43.462 | 52.896 | 1.00 | 0.00 | H |
| ATOM | 4869 | CG   | ASP | 313 | 57.950 | 45.594 | 52.647 | 1.00 | 0.00 | C |
| ATOM | 4870 | OD1  | ASP | 313 | 57.287 | 46.424 | 51.991 | 1.00 | 0.00 | O |
| ATOM | 4871 | OD2  | ASP | 313 | 59.110 | 45.878 | 53.038 | 1.00 | 0.00 | O |
| ATOM | 4872 | C    | ASP | 313 | 56.870 | 43.536 | 50.520 | 1.00 | 0.00 | C |
| ATOM | 4873 | O    | ASP | 313 | 57.108 | 44.447 | 49.728 | 1.00 | 0.00 | O |
| ATOM | 4874 | N    | THR | 314 | 57.069 | 42.265 | 50.147 | 1.00 | 0.00 | N |
| ATOM | 4875 | H    | THR | 314 | 56.853 | 41.522 | 50.801 | 1.00 | 0.00 | H |
| ATOM | 4876 | CA   | THR | 314 | 57.555 | 41.898 | 48.803 | 1.00 | 0.00 | C |
| ATOM | 4877 | HA   | THR | 314 | 58.475 | 42.449 | 48.613 | 1.00 | 0.00 | H |
| ATOM | 4878 | CB   | THR | 314 | 57.887 | 40.397 | 48.729 | 1.00 | 0.00 | C |
| ATOM | 4879 | HB   | THR | 314 | 56.978 | 39.812 | 48.874 | 1.00 | 0.00 | H |
| ATOM | 4880 | CG2  | THR | 314 | 58.537 | 40.010 | 47.401 | 1.00 | 0.00 | C |
| ATOM | 4881 | HG21 | THR | 314 | 59.493 | 40.522 | 47.299 | 1.00 | 0.00 | H |
| ATOM | 4882 | HG22 | THR | 314 | 57.899 | 40.280 | 46.563 | 1.00 | 0.00 | H |
| ATOM | 4883 | HG23 | THR | 314 | 58.695 | 38.931 | 47.384 | 1.00 | 0.00 | H |
| ATOM | 4884 | OG1  | THR | 314 | 58.827 | 40.075 | 49.731 | 1.00 | 0.00 | O |
| ATOM | 4885 | HG1  | THR | 314 | 58.462 | 39.373 | 50.298 | 1.00 | 0.00 | H |

|      |      |      |     |     |        |        |        |      |      |   |
|------|------|------|-----|-----|--------|--------|--------|------|------|---|
| ATOM | 4886 | C    | THR | 314 | 56.549 | 42.296 | 47.712 | 1.00 | 0.00 | C |
| ATOM | 4887 | O    | THR | 314 | 56.937 | 42.817 | 46.663 | 1.00 | 0.00 | O |
| ATOM | 4888 | N    | VAL | 315 | 55.247 | 42.136 | 47.979 | 1.00 | 0.00 | N |
| ATOM | 4889 | H    | VAL | 315 | 54.990 | 41.786 | 48.895 | 1.00 | 0.00 | H |
| ATOM | 4890 | CA   | VAL | 315 | 54.164 | 42.576 | 47.078 | 1.00 | 0.00 | C |
| ATOM | 4891 | HA   | VAL | 315 | 54.439 | 42.291 | 46.065 | 1.00 | 0.00 | H |
| ATOM | 4892 | CB   | VAL | 315 | 52.817 | 41.916 | 47.445 | 1.00 | 0.00 | C |
| ATOM | 4893 | HB   | VAL | 315 | 52.375 | 42.497 | 48.252 | 1.00 | 0.00 | H |
| ATOM | 4894 | CG1  | VAL | 315 | 51.874 | 41.965 | 46.234 | 1.00 | 0.00 | C |
| ATOM | 4895 | HG11 | VAL | 315 | 51.591 | 42.995 | 46.020 | 1.00 | 0.00 | H |
| ATOM | 4896 | HG12 | VAL | 315 | 52.345 | 41.545 | 45.348 | 1.00 | 0.00 | H |
| ATOM | 4897 | HG13 | VAL | 315 | 50.974 | 41.393 | 46.437 | 1.00 | 0.00 | H |
| ATOM | 4898 | CG2  | VAL | 315 | 52.905 | 40.466 | 47.953 | 1.00 | 0.00 | C |
| ATOM | 4899 | HG21 | VAL | 315 | 53.468 | 40.424 | 48.884 | 1.00 | 0.00 | H |
| ATOM | 4900 | HG22 | VAL | 315 | 53.374 | 39.813 | 47.222 | 1.00 | 0.00 | H |
| ATOM | 4901 | HG23 | VAL | 315 | 51.903 | 40.090 | 48.163 | 1.00 | 0.00 | H |
| ATOM | 4902 | C    | VAL | 315 | 53.999 | 44.102 | 47.078 | 1.00 | 0.00 | C |
| ATOM | 4903 | O    | VAL | 315 | 53.675 | 44.700 | 46.050 | 1.00 | 0.00 | O |
| ATOM | 4904 | N    | ASN | 316 | 54.294 | 44.733 | 48.219 | 1.00 | 0.00 | N |
| ATOM | 4905 | H    | ASN | 316 | 54.564 | 44.165 | 49.009 | 1.00 | 0.00 | H |
| ATOM | 4906 | CA   | ASN | 316 | 54.271 | 46.183 | 48.415 | 1.00 | 0.00 | C |
| ATOM | 4907 | HA   | ASN | 316 | 53.257 | 46.539 | 48.237 | 1.00 | 0.00 | H |
| ATOM | 4908 | CB   | ASN | 316 | 54.694 | 46.459 | 49.871 | 1.00 | 0.00 | C |
| ATOM | 4909 | HB2  | ASN | 316 | 54.323 | 45.662 | 50.506 | 1.00 | 0.00 | H |
| ATOM | 4910 | HB3  | ASN | 316 | 55.779 | 46.478 | 49.941 | 1.00 | 0.00 | H |
| ATOM | 4911 | CG   | ASN | 316 | 54.191 | 47.766 | 50.439 | 1.00 | 0.00 | C |
| ATOM | 4912 | OD1  | ASN | 316 | 53.448 | 48.492 | 49.802 | 1.00 | 0.00 | O |
| ATOM | 4913 | ND2  | ASN | 316 | 54.576 | 48.099 | 51.645 | 1.00 | 0.00 | N |
| ATOM | 4914 | HD21 | ASN | 316 | 55.193 | 47.486 | 52.174 | 1.00 | 0.00 | H |
| ATOM | 4915 | HD22 | ASN | 316 | 54.101 | 48.855 | 52.114 | 1.00 | 0.00 | H |
| ATOM | 4916 | C    | ASN | 316 | 55.212 | 46.914 | 47.455 | 1.00 | 0.00 | C |
| ATOM | 4917 | O    | ASN | 316 | 54.864 | 47.957 | 46.902 | 1.00 | 0.00 | O |
| ATOM | 4918 | N    | VAL | 317 | 56.409 | 46.356 | 47.250 | 1.00 | 0.00 | N |
| ATOM | 4919 | H    | VAL | 317 | 56.642 | 45.522 | 47.779 | 1.00 | 0.00 | H |
| ATOM | 4920 | CA   | VAL | 317 | 57.379 | 46.904 | 46.300 | 1.00 | 0.00 | C |
| ATOM | 4921 | HA   | VAL | 317 | 57.319 | 47.991 | 46.357 | 1.00 | 0.00 | H |
| ATOM | 4922 | CB   | VAL | 317 | 58.825 | 46.520 | 46.669 | 1.00 | 0.00 | C |
| ATOM | 4923 | HB   | VAL | 317 | 58.965 | 45.445 | 46.545 | 1.00 | 0.00 | H |
| ATOM | 4924 | CG1  | VAL | 317 | 59.831 | 47.281 | 45.798 | 1.00 | 0.00 | C |
| ATOM | 4925 | HG11 | VAL | 317 | 59.710 | 46.993 | 44.758 | 1.00 | 0.00 | H |
| ATOM | 4926 | HG12 | VAL | 317 | 59.664 | 48.355 | 45.882 | 1.00 | 0.00 | H |
| ATOM | 4927 | HG13 | VAL | 317 | 60.850 | 47.047 | 46.104 | 1.00 | 0.00 | H |
| ATOM | 4928 | CG2  | VAL | 317 | 59.159 | 46.905 | 48.118 | 1.00 | 0.00 | C |
| ATOM | 4929 | HG21 | VAL | 317 | 60.198 | 46.656 | 48.332 | 1.00 | 0.00 | H |
| ATOM | 4930 | HG22 | VAL | 317 | 58.530 | 46.341 | 48.804 | 1.00 | 0.00 | H |
| ATOM | 4931 | HG23 | VAL | 317 | 58.997 | 47.974 | 48.260 | 1.00 | 0.00 | H |
| ATOM | 4932 | C    | VAL | 317 | 57.007 | 46.537 | 44.860 | 1.00 | 0.00 | C |
| ATOM | 4933 | O    | VAL | 317 | 57.010 | 47.433 | 44.022 | 1.00 | 0.00 | O |
| ATOM | 4934 | N    | ALA | 318 | 56.579 | 45.297 | 44.576 | 1.00 | 0.00 | N |
| ATOM | 4935 | H    | ALA | 318 | 56.574 | 44.602 | 45.311 | 1.00 | 0.00 | H |
| ATOM | 4936 | CA   | ALA | 318 | 56.235 | 44.858 | 43.213 | 1.00 | 0.00 | C |
| ATOM | 4937 | HA   | ALA | 318 | 57.142 | 44.866 | 42.606 | 1.00 | 0.00 | H |

|      |      |      |     |     |        |        |        |      |      |   |
|------|------|------|-----|-----|--------|--------|--------|------|------|---|
| ATOM | 4938 | CB   | ALA | 318 | 55.699 | 43.419 | 43.267 | 1.00 | 0.00 | C |
| ATOM | 4939 | HB1  | ALA | 318 | 56.415 | 42.759 | 43.751 | 1.00 | 0.00 | H |
| ATOM | 4940 | HB2  | ALA | 318 | 55.525 | 43.058 | 42.252 | 1.00 | 0.00 | H |
| ATOM | 4941 | HB3  | ALA | 318 | 54.761 | 43.386 | 43.821 | 1.00 | 0.00 | H |
| ATOM | 4942 | C    | ALA | 318 | 55.212 | 45.781 | 42.520 | 1.00 | 0.00 | C |
| ATOM | 4943 | O    | ALA | 318 | 55.434 | 46.232 | 41.396 | 1.00 | 0.00 | O |
| ATOM | 4944 | N    | SER | 319 | 54.115 | 46.112 | 43.212 | 1.00 | 0.00 | N |
| ATOM | 4945 | H    | SER | 319 | 53.997 | 45.711 | 44.137 | 1.00 | 0.00 | H |
| ATOM | 4946 | CA   | SER | 319 | 53.067 | 46.996 | 42.679 | 1.00 | 0.00 | C |
| ATOM | 4947 | HA   | SER | 319 | 52.788 | 46.642 | 41.690 | 1.00 | 0.00 | H |
| ATOM | 4948 | CB   | SER | 319 | 51.832 | 46.895 | 43.580 | 1.00 | 0.00 | C |
| ATOM | 4949 | HB2  | SER | 319 | 51.489 | 45.860 | 43.602 | 1.00 | 0.00 | H |
| ATOM | 4950 | HB3  | SER | 319 | 52.102 | 47.194 | 44.595 | 1.00 | 0.00 | H |
| ATOM | 4951 | OG   | SER | 319 | 50.779 | 47.719 | 43.130 | 1.00 | 0.00 | O |
| ATOM | 4952 | HG   | SER | 319 | 50.539 | 47.470 | 42.227 | 1.00 | 0.00 | H |
| ATOM | 4953 | C    | SER | 319 | 53.541 | 48.447 | 42.500 | 1.00 | 0.00 | C |
| ATOM | 4954 | O    | SER | 319 | 53.230 | 49.086 | 41.497 | 1.00 | 0.00 | O |
| ATOM | 4955 | N    | ARG | 320 | 54.370 | 48.968 | 43.413 | 1.00 | 0.00 | N |
| ATOM | 4956 | H    | ARG | 320 | 54.657 | 48.389 | 44.192 | 1.00 | 0.00 | H |
| ATOM | 4957 | CA   | ARG | 320 | 54.900 | 50.339 | 43.304 | 1.00 | 0.00 | C |
| ATOM | 4958 | HA   | ARG | 320 | 54.098 | 50.982 | 42.934 | 1.00 | 0.00 | H |
| ATOM | 4959 | CB   | ARG | 320 | 55.298 | 50.858 | 44.699 | 1.00 | 0.00 | C |
| ATOM | 4960 | HB2  | ARG | 320 | 56.063 | 50.205 | 45.123 | 1.00 | 0.00 | H |
| ATOM | 4961 | HB3  | ARG | 320 | 55.711 | 51.863 | 44.599 | 1.00 | 0.00 | H |
| ATOM | 4962 | CG   | ARG | 320 | 54.075 | 50.910 | 45.646 | 1.00 | 0.00 | C |
| ATOM | 4963 | HG2  | ARG | 320 | 53.307 | 51.554 | 45.217 | 1.00 | 0.00 | H |
| ATOM | 4964 | HG3  | ARG | 320 | 53.655 | 49.909 | 45.737 | 1.00 | 0.00 | H |
| ATOM | 4965 | CD   | ARG | 320 | 54.424 | 51.422 | 47.053 | 1.00 | 0.00 | C |
| ATOM | 4966 | HD2  | ARG | 320 | 55.433 | 51.087 | 47.301 | 1.00 | 0.00 | H |
| ATOM | 4967 | HD3  | ARG | 320 | 54.419 | 52.512 | 47.054 | 1.00 | 0.00 | H |
| ATOM | 4968 | NE   | ARG | 320 | 53.508 | 50.876 | 48.077 | 1.00 | 0.00 | N |
| ATOM | 4969 | HE   | ARG | 320 | 53.579 | 49.879 | 48.255 | 1.00 | 0.00 | H |
| ATOM | 4970 | CZ   | ARG | 320 | 52.660 | 51.497 | 48.883 | 1.00 | 0.00 | C |
| ATOM | 4971 | NH1  | ARG | 320 | 52.401 | 52.770 | 48.851 | 1.00 | 0.00 | N |
| ATOM | 4972 | HH11 | ARG | 320 | 52.785 | 53.350 | 48.134 | 1.00 | 0.00 | H |
| ATOM | 4973 | HH12 | ARG | 320 | 51.731 | 53.104 | 49.527 | 1.00 | 0.00 | H |
| ATOM | 4974 | NH2  | ARG | 320 | 52.037 | 50.819 | 49.785 | 1.00 | 0.00 | N |
| ATOM | 4975 | HH21 | ARG | 320 | 52.282 | 49.849 | 49.934 | 1.00 | 0.00 | H |
| ATOM | 4976 | HH22 | ARG | 320 | 51.534 | 51.288 | 50.551 | 1.00 | 0.00 | H |
| ATOM | 4977 | C    | ARG | 320 | 56.007 | 50.458 | 42.239 | 1.00 | 0.00 | C |
| ATOM | 4978 | O    | ARG | 320 | 56.111 | 51.503 | 41.603 | 1.00 | 0.00 | O |
| ATOM | 4979 | N    | ILE | 321 | 56.771 | 49.391 | 41.977 | 1.00 | 0.00 | N |
| ATOM | 4980 | H    | ILE | 321 | 56.655 | 48.575 | 42.568 | 1.00 | 0.00 | H |
| ATOM | 4981 | CA   | ILE | 321 | 57.722 | 49.299 | 40.851 | 1.00 | 0.00 | C |
| ATOM | 4982 | HA   | ILE | 321 | 58.284 | 50.230 | 40.798 | 1.00 | 0.00 | H |
| ATOM | 4983 | CB   | ILE | 321 | 58.723 | 48.138 | 41.084 | 1.00 | 0.00 | C |
| ATOM | 4984 | HB   | ILE | 321 | 58.152 | 47.246 | 41.348 | 1.00 | 0.00 | H |
| ATOM | 4985 | CG2  | ILE | 321 | 59.541 | 47.785 | 39.826 | 1.00 | 0.00 | C |
| ATOM | 4986 | HG21 | ILE | 321 | 58.893 | 47.347 | 39.065 | 1.00 | 0.00 | H |
| ATOM | 4987 | HG22 | ILE | 321 | 60.307 | 47.049 | 40.071 | 1.00 | 0.00 | H |
| ATOM | 4988 | HG23 | ILE | 321 | 60.010 | 48.677 | 39.413 | 1.00 | 0.00 | H |
| ATOM | 4989 | CG1  | ILE | 321 | 59.682 | 48.440 | 42.261 | 1.00 | 0.00 | C |

|      |      |      |     |     |        |        |        |      |      |   |
|------|------|------|-----|-----|--------|--------|--------|------|------|---|
| ATOM | 4990 | HG12 | ILE | 321 | 59.099 | 48.537 | 43.173 | 1.00 | 0.00 | H |
| ATOM | 4991 | HG13 | ILE | 321 | 60.349 | 47.587 | 42.389 | 1.00 | 0.00 | H |
| ATOM | 4992 | CD1  | ILE | 321 | 60.536 | 49.710 | 42.139 | 1.00 | 0.00 | C |
| ATOM | 4993 | HD11 | ILE | 321 | 61.050 | 49.738 | 41.183 | 1.00 | 0.00 | H |
| ATOM | 4994 | HD12 | ILE | 321 | 61.277 | 49.724 | 42.939 | 1.00 | 0.00 | H |
| ATOM | 4995 | HD13 | ILE | 321 | 59.906 | 50.593 | 42.236 | 1.00 | 0.00 | H |
| ATOM | 4996 | C    | ILE | 321 | 57.003 | 49.185 | 39.500 | 1.00 | 0.00 | C |
| ATOM | 4997 | O    | ILE | 321 | 57.424 | 49.831 | 38.541 | 1.00 | 0.00 | O |
| ATOM | 4998 | N    | GLU | 322 | 55.886 | 48.453 | 39.418 | 1.00 | 0.00 | N |
| ATOM | 4999 | H    | GLU | 322 | 55.601 | 47.892 | 40.214 | 1.00 | 0.00 | H |
| ATOM | 5000 | CA   | GLU | 322 | 55.010 | 48.481 | 38.236 | 1.00 | 0.00 | C |
| ATOM | 5001 | HA   | GLU | 322 | 55.576 | 48.139 | 37.369 | 1.00 | 0.00 | H |
| ATOM | 5002 | CB   | GLU | 322 | 53.823 | 47.522 | 38.444 | 1.00 | 0.00 | C |
| ATOM | 5003 | HB2  | GLU | 322 | 54.221 | 46.512 | 38.515 | 1.00 | 0.00 | H |
| ATOM | 5004 | HB3  | GLU | 322 | 53.346 | 47.734 | 39.396 | 1.00 | 0.00 | H |
| ATOM | 5005 | CG   | GLU | 322 | 52.763 | 47.535 | 37.325 | 1.00 | 0.00 | C |
| ATOM | 5006 | HG2  | GLU | 322 | 53.274 | 47.501 | 36.360 | 1.00 | 0.00 | H |
| ATOM | 5007 | HG3  | GLU | 322 | 52.172 | 46.625 | 37.413 | 1.00 | 0.00 | H |
| ATOM | 5008 | CD   | GLU | 322 | 51.783 | 48.721 | 37.362 | 1.00 | 0.00 | C |
| ATOM | 5009 | OE1  | GLU | 322 | 51.519 | 49.285 | 38.446 | 1.00 | 0.00 | O |
| ATOM | 5010 | OE2  | GLU | 322 | 51.318 | 49.118 | 36.271 | 1.00 | 0.00 | O |
| ATOM | 5011 | C    | GLU | 322 | 54.552 | 49.914 | 37.938 | 1.00 | 0.00 | C |
| ATOM | 5012 | O    | GLU | 322 | 54.713 | 50.398 | 36.818 | 1.00 | 0.00 | O |
| ATOM | 5013 | N    | THR | 323 | 54.059 | 50.636 | 38.944 | 1.00 | 0.00 | N |
| ATOM | 5014 | H    | THR | 323 | 53.850 | 50.154 | 39.814 | 1.00 | 0.00 | H |
| ATOM | 5015 | CA   | THR | 323 | 53.565 | 52.008 | 38.769 | 1.00 | 0.00 | C |
| ATOM | 5016 | HA   | THR | 323 | 52.919 | 52.023 | 37.895 | 1.00 | 0.00 | H |
| ATOM | 5017 | CB   | THR | 323 | 52.670 | 52.364 | 39.964 | 1.00 | 0.00 | C |
| ATOM | 5018 | HB   | THR | 323 | 53.170 | 52.074 | 40.889 | 1.00 | 0.00 | H |
| ATOM | 5019 | CG2  | THR | 323 | 52.286 | 53.841 | 40.054 | 1.00 | 0.00 | C |
| ATOM | 5020 | HG21 | THR | 323 | 53.167 | 54.446 | 40.268 | 1.00 | 0.00 | H |
| ATOM | 5021 | HG22 | THR | 323 | 51.564 | 53.977 | 40.859 | 1.00 | 0.00 | H |
| ATOM | 5022 | HG23 | THR | 323 | 51.839 | 54.162 | 39.112 | 1.00 | 0.00 | H |
| ATOM | 5023 | OG1  | THR | 323 | 51.447 | 51.666 | 39.849 | 1.00 | 0.00 | O |
| ATOM | 5024 | HG1  | THR | 323 | 51.589 | 50.782 | 39.442 | 1.00 | 0.00 | H |
| ATOM | 5025 | C    | THR | 323 | 54.690 | 53.023 | 38.481 | 1.00 | 0.00 | C |
| ATOM | 5026 | O    | THR | 323 | 54.456 | 54.027 | 37.807 | 1.00 | 0.00 | O |
| ATOM | 5027 | N    | ALA | 324 | 55.944 | 52.748 | 38.861 | 1.00 | 0.00 | N |
| ATOM | 5028 | H    | ALA | 324 | 56.103 | 51.934 | 39.444 | 1.00 | 0.00 | H |
| ATOM | 5029 | CA   | ALA | 324 | 57.100 | 53.580 | 38.496 | 1.00 | 0.00 | C |
| ATOM | 5030 | HA   | ALA | 324 | 56.887 | 54.606 | 38.799 | 1.00 | 0.00 | H |
| ATOM | 5031 | CB   | ALA | 324 | 58.319 | 53.096 | 39.291 | 1.00 | 0.00 | C |
| ATOM | 5032 | HB1  | ALA | 324 | 58.602 | 52.092 | 38.976 | 1.00 | 0.00 | H |
| ATOM | 5033 | HB2  | ALA | 324 | 58.089 | 53.089 | 40.358 | 1.00 | 0.00 | H |
| ATOM | 5034 | HB3  | ALA | 324 | 59.159 | 53.768 | 39.117 | 1.00 | 0.00 | H |
| ATOM | 5035 | C    | ALA | 324 | 57.398 | 53.610 | 36.976 | 1.00 | 0.00 | C |
| ATOM | 5036 | O    | ALA | 324 | 58.005 | 54.565 | 36.482 | 1.00 | 0.00 | O |
| ATOM | 5037 | N    | THR | 325 | 56.936 | 52.611 | 36.212 | 1.00 | 0.00 | N |
| ATOM | 5038 | H    | THR | 325 | 56.449 | 51.854 | 36.679 | 1.00 | 0.00 | H |
| ATOM | 5039 | CA   | THR | 325 | 57.164 | 52.496 | 34.753 | 1.00 | 0.00 | C |
| ATOM | 5040 | HA   | THR | 325 | 58.222 | 52.325 | 34.566 | 1.00 | 0.00 | H |
| ATOM | 5041 | CB   | THR | 325 | 56.379 | 51.322 | 34.161 | 1.00 | 0.00 | C |

|      |      |      |     |     |        |        |        |      |      |   |
|------|------|------|-----|-----|--------|--------|--------|------|------|---|
| ATOM | 5042 | HB   | THR | 325 | 56.455 | 51.382 | 33.080 | 1.00 | 0.00 | H |
| ATOM | 5043 | CG2  | THR | 325 | 56.877 | 49.940 | 34.579 | 1.00 | 0.00 | C |
| ATOM | 5044 | HG21 | THR | 325 | 56.970 | 49.867 | 35.662 | 1.00 | 0.00 | H |
| ATOM | 5045 | HG22 | THR | 325 | 57.851 | 49.759 | 34.129 | 1.00 | 0.00 | H |
| ATOM | 5046 | HG23 | THR | 325 | 56.188 | 49.173 | 34.224 | 1.00 | 0.00 | H |
| ATOM | 5047 | OG1  | THR | 325 | 55.016 | 51.446 | 34.483 | 1.00 | 0.00 | O |
| ATOM | 5048 | HG1  | THR | 325 | 54.915 | 50.996 | 35.354 | 1.00 | 0.00 | H |
| ATOM | 5049 | C    | THR | 325 | 56.761 | 53.733 | 33.944 | 1.00 | 0.00 | C |
| ATOM | 5050 | O    | THR | 325 | 57.420 | 54.041 | 32.951 | 1.00 | 0.00 | O |
| ATOM | 5051 | N    | ARG | 326 | 55.708 | 54.464 | 34.348 | 1.00 | 0.00 | N |
| ATOM | 5052 | H    | ARG | 326 | 55.236 | 54.175 | 35.195 | 1.00 | 0.00 | H |
| ATOM | 5053 | CA   | ARG | 326 | 55.215 | 55.644 | 33.606 | 1.00 | 0.00 | C |
| ATOM | 5054 | HA   | ARG | 326 | 55.058 | 55.359 | 32.564 | 1.00 | 0.00 | H |
| ATOM | 5055 | CB   | ARG | 326 | 53.880 | 56.180 | 34.170 | 1.00 | 0.00 | C |
| ATOM | 5056 | HB2  | ARG | 326 | 54.036 | 56.557 | 35.182 | 1.00 | 0.00 | H |
| ATOM | 5057 | HB3  | ARG | 326 | 53.596 | 57.036 | 33.555 | 1.00 | 0.00 | H |
| ATOM | 5058 | CG   | ARG | 326 | 52.681 | 55.209 | 34.158 | 1.00 | 0.00 | C |
| ATOM | 5059 | HG2  | ARG | 326 | 51.766 | 55.797 | 34.073 | 1.00 | 0.00 | H |
| ATOM | 5060 | HG3  | ARG | 326 | 52.743 | 54.539 | 33.300 | 1.00 | 0.00 | H |
| ATOM | 5061 | CD   | ARG | 326 | 52.602 | 54.402 | 35.457 | 1.00 | 0.00 | C |
| ATOM | 5062 | HD2  | ARG | 326 | 53.464 | 53.741 | 35.521 | 1.00 | 0.00 | H |
| ATOM | 5063 | HD3  | ARG | 326 | 52.647 | 55.095 | 36.299 | 1.00 | 0.00 | H |
| ATOM | 5064 | NE   | ARG | 326 | 51.356 | 53.629 | 35.589 | 1.00 | 0.00 | N |
| ATOM | 5065 | HE   | ARG | 326 | 50.493 | 54.152 | 35.776 | 1.00 | 0.00 | H |
| ATOM | 5066 | CZ   | ARG | 326 | 51.265 | 52.318 | 35.719 | 1.00 | 0.00 | C |
| ATOM | 5067 | NH1  | ARG | 326 | 52.225 | 51.508 | 35.395 | 1.00 | 0.00 | N |
| ATOM | 5068 | HH11 | ARG | 326 | 53.094 | 51.828 | 35.013 | 1.00 | 0.00 | H |
| ATOM | 5069 | HH12 | ARG | 326 | 52.054 | 50.523 | 35.611 | 1.00 | 0.00 | H |
| ATOM | 5070 | NH2  | ARG | 326 | 50.215 | 51.742 | 36.204 | 1.00 | 0.00 | N |
| ATOM | 5071 | HH21 | ARG | 326 | 49.386 | 52.282 | 36.453 | 1.00 | 0.00 | H |
| ATOM | 5072 | HH22 | ARG | 326 | 50.252 | 50.731 | 36.348 | 1.00 | 0.00 | H |
| ATOM | 5073 | C    | ARG | 326 | 56.237 | 56.786 | 33.574 | 1.00 | 0.00 | C |
| ATOM | 5074 | O    | ARG | 326 | 56.240 | 57.558 | 32.616 | 1.00 | 0.00 | O |
| ATOM | 5075 | N    | ILE | 327 | 57.086 | 56.894 | 34.601 | 1.00 | 0.00 | N |
| ATOM | 5076 | H    | ILE | 327 | 57.034 | 56.191 | 35.327 | 1.00 | 0.00 | H |
| ATOM | 5077 | CA   | ILE | 327 | 58.120 | 57.933 | 34.717 | 1.00 | 0.00 | C |
| ATOM | 5078 | HA   | ILE | 327 | 57.731 | 58.868 | 34.307 | 1.00 | 0.00 | H |
| ATOM | 5079 | CB   | ILE | 327 | 58.482 | 58.180 | 36.206 | 1.00 | 0.00 | C |
| ATOM | 5080 | HB   | ILE | 327 | 58.831 | 57.238 | 36.634 | 1.00 | 0.00 | H |
| ATOM | 5081 | CG2  | ILE | 327 | 59.624 | 59.208 | 36.340 | 1.00 | 0.00 | C |
| ATOM | 5082 | HG21 | ILE | 327 | 60.511 | 58.885 | 35.796 | 1.00 | 0.00 | H |
| ATOM | 5083 | HG22 | ILE | 327 | 59.919 | 59.312 | 37.384 | 1.00 | 0.00 | H |
| ATOM | 5084 | HG23 | ILE | 327 | 59.297 | 60.181 | 35.968 | 1.00 | 0.00 | H |
| ATOM | 5085 | CG1  | ILE | 327 | 57.239 | 58.645 | 37.005 | 1.00 | 0.00 | C |
| ATOM | 5086 | HG12 | ILE | 327 | 56.898 | 59.606 | 36.617 | 1.00 | 0.00 | H |
| ATOM | 5087 | HG13 | ILE | 327 | 56.432 | 57.925 | 36.870 | 1.00 | 0.00 | H |
| ATOM | 5088 | CD1  | ILE | 327 | 57.469 | 58.773 | 38.517 | 1.00 | 0.00 | C |
| ATOM | 5089 | HD11 | ILE | 327 | 57.895 | 57.849 | 38.909 | 1.00 | 0.00 | H |
| ATOM | 5090 | HD12 | ILE | 327 | 56.515 | 58.960 | 39.010 | 1.00 | 0.00 | H |
| ATOM | 5091 | HD13 | ILE | 327 | 58.136 | 59.607 | 38.735 | 1.00 | 0.00 | H |
| ATOM | 5092 | C    | ILE | 327 | 59.353 | 57.549 | 33.889 | 1.00 | 0.00 | C |
| ATOM | 5093 | O    | ILE | 327 | 59.829 | 58.343 | 33.078 | 1.00 | 0.00 | O |

|      |      |      |     |     |        |        |        |      |      |   |
|------|------|------|-----|-----|--------|--------|--------|------|------|---|
| ATOM | 5094 | N    | PHE | 328 | 59.860 | 56.327 | 34.081 | 1.00 | 0.00 | N |
| ATOM | 5095 | H    | PHE | 328 | 59.384 | 55.728 | 34.743 | 1.00 | 0.00 | H |
| ATOM | 5096 | CA   | PHE | 328 | 61.163 | 55.865 | 33.579 | 1.00 | 0.00 | C |
| ATOM | 5097 | HA   | PHE | 328 | 61.806 | 56.741 | 33.481 | 1.00 | 0.00 | H |
| ATOM | 5098 | CB   | PHE | 328 | 61.803 | 54.947 | 34.635 | 1.00 | 0.00 | C |
| ATOM | 5099 | HB2  | PHE | 328 | 61.178 | 54.060 | 34.755 | 1.00 | 0.00 | H |
| ATOM | 5100 | HB3  | PHE | 328 | 62.778 | 54.615 | 34.281 | 1.00 | 0.00 | H |
| ATOM | 5101 | CG   | PHE | 328 | 62.009 | 55.615 | 35.981 | 1.00 | 0.00 | C |
| ATOM | 5102 | CD1  | PHE | 328 | 62.902 | 56.699 | 36.090 | 1.00 | 0.00 | C |
| ATOM | 5103 | HD1  | PHE | 328 | 63.445 | 57.038 | 35.220 | 1.00 | 0.00 | H |
| ATOM | 5104 | CE1  | PHE | 328 | 63.082 | 57.345 | 37.326 | 1.00 | 0.00 | C |
| ATOM | 5105 | HE1  | PHE | 328 | 63.759 | 58.182 | 37.417 | 1.00 | 0.00 | H |
| ATOM | 5106 | CZ   | PHE | 328 | 62.377 | 56.899 | 38.456 | 1.00 | 0.00 | C |
| ATOM | 5107 | HZ   | PHE | 328 | 62.519 | 57.392 | 39.408 | 1.00 | 0.00 | H |
| ATOM | 5108 | CE2  | PHE | 328 | 61.491 | 55.814 | 38.353 | 1.00 | 0.00 | C |
| ATOM | 5109 | HE2  | PHE | 328 | 60.953 | 55.478 | 39.228 | 1.00 | 0.00 | H |
| ATOM | 5110 | CD2  | PHE | 328 | 61.305 | 55.171 | 37.116 | 1.00 | 0.00 | C |
| ATOM | 5111 | HD2  | PHE | 328 | 60.619 | 54.340 | 37.041 | 1.00 | 0.00 | H |
| ATOM | 5112 | C    | PHE | 328 | 61.137 | 55.234 | 32.172 | 1.00 | 0.00 | C |
| ATOM | 5113 | O    | PHE | 328 | 61.986 | 54.403 | 31.859 | 1.00 | 0.00 | O |
| ATOM | 5114 | N    | ASN | 329 | 60.174 | 55.619 | 31.327 | 1.00 | 0.00 | N |
| ATOM | 5115 | H    | ASN | 329 | 59.553 | 56.338 | 31.672 | 1.00 | 0.00 | H |
| ATOM | 5116 | CA   | ASN | 329 | 59.897 | 55.110 | 29.970 | 1.00 | 0.00 | C |
| ATOM | 5117 | HA   | ASN | 329 | 59.001 | 55.632 | 29.628 | 1.00 | 0.00 | H |
| ATOM | 5118 | CB   | ASN | 329 | 61.018 | 55.499 | 28.980 | 1.00 | 0.00 | C |
| ATOM | 5119 | HB2  | ASN | 329 | 61.936 | 54.986 | 29.263 | 1.00 | 0.00 | H |
| ATOM | 5120 | HB3  | ASN | 329 | 60.747 | 55.146 | 27.986 | 1.00 | 0.00 | H |
| ATOM | 5121 | CG   | ASN | 329 | 61.290 | 56.992 | 28.863 | 1.00 | 0.00 | C |
| ATOM | 5122 | OD1  | ASN | 329 | 60.456 | 57.780 | 28.441 | 1.00 | 0.00 | O |
| ATOM | 5123 | ND2  | ASN | 329 | 62.490 | 57.420 | 29.169 | 1.00 | 0.00 | N |
| ATOM | 5124 | HD21 | ASN | 329 | 63.210 | 56.741 | 29.401 | 1.00 | 0.00 | H |
| ATOM | 5125 | HD22 | ASN | 329 | 62.717 | 58.391 | 29.039 | 1.00 | 0.00 | H |
| ATOM | 5126 | C    | ASN | 329 | 59.553 | 53.605 | 29.857 | 1.00 | 0.00 | C |
| ATOM | 5127 | O    | ASN | 329 | 58.558 | 53.284 | 29.205 | 1.00 | 0.00 | O |
| ATOM | 5128 | N    | SER | 330 | 60.330 | 52.694 | 30.458 | 1.00 | 0.00 | N |
| ATOM | 5129 | H    | SER | 330 | 61.120 | 53.053 | 30.985 | 1.00 | 0.00 | H |
| ATOM | 5130 | CA   | SER | 330 | 60.263 | 51.235 | 30.248 | 1.00 | 0.00 | C |
| ATOM | 5131 | HA   | SER | 330 | 60.478 | 51.045 | 29.196 | 1.00 | 0.00 | H |
| ATOM | 5132 | CB   | SER | 330 | 61.338 | 50.517 | 31.073 | 1.00 | 0.00 | C |
| ATOM | 5133 | HB2  | SER | 330 | 62.322 | 50.924 | 30.839 | 1.00 | 0.00 | H |
| ATOM | 5134 | HB3  | SER | 330 | 61.135 | 50.662 | 32.135 | 1.00 | 0.00 | H |
| ATOM | 5135 | OG   | SER | 330 | 61.301 | 49.134 | 30.767 | 1.00 | 0.00 | O |
| ATOM | 5136 | HG   | SER | 330 | 61.476 | 48.611 | 31.576 | 1.00 | 0.00 | H |
| ATOM | 5137 | C    | SER | 330 | 58.902 | 50.612 | 30.578 | 1.00 | 0.00 | C |
| ATOM | 5138 | O    | SER | 330 | 58.274 | 50.951 | 31.584 | 1.00 | 0.00 | O |
| ATOM | 5139 | N    | LYS | 331 | 58.444 | 49.659 | 29.754 | 1.00 | 0.00 | N |
| ATOM | 5140 | H    | LYS | 331 | 59.048 | 49.377 | 28.983 | 1.00 | 0.00 | H |
| ATOM | 5141 | CA   | LYS | 331 | 57.197 | 48.905 | 29.981 | 1.00 | 0.00 | C |
| ATOM | 5142 | HA   | LYS | 331 | 56.473 | 49.586 | 30.419 | 1.00 | 0.00 | H |
| ATOM | 5143 | CB   | LYS | 331 | 56.609 | 48.407 | 28.642 | 1.00 | 0.00 | C |
| ATOM | 5144 | HB2  | LYS | 331 | 57.298 | 47.706 | 28.168 | 1.00 | 0.00 | H |
| ATOM | 5145 | HB3  | LYS | 331 | 55.669 | 47.891 | 28.845 | 1.00 | 0.00 | H |

|      |      |      |     |     |        |        |        |      |      |   |
|------|------|------|-----|-----|--------|--------|--------|------|------|---|
| ATOM | 5146 | CG   | LYS | 331 | 56.338 | 49.591 | 27.695 | 1.00 | 0.00 | C |
| ATOM | 5147 | HG2  | LYS | 331 | 55.856 | 50.382 | 28.270 | 1.00 | 0.00 | H |
| ATOM | 5148 | HG3  | LYS | 331 | 57.295 | 49.974 | 27.335 | 1.00 | 0.00 | H |
| ATOM | 5149 | CD   | LYS | 331 | 55.443 | 49.288 | 26.481 | 1.00 | 0.00 | C |
| ATOM | 5150 | HD2  | LYS | 331 | 55.883 | 48.500 | 25.867 | 1.00 | 0.00 | H |
| ATOM | 5151 | HD3  | LYS | 331 | 54.453 | 48.986 | 26.827 | 1.00 | 0.00 | H |
| ATOM | 5152 | CE   | LYS | 331 | 55.358 | 50.602 | 25.690 | 1.00 | 0.00 | C |
| ATOM | 5153 | HE2  | LYS | 331 | 55.180 | 51.399 | 26.416 | 1.00 | 0.00 | H |
| ATOM | 5154 | HE3  | LYS | 331 | 56.328 | 50.808 | 25.231 | 1.00 | 0.00 | H |
| ATOM | 5155 | NZ   | LYS | 331 | 54.284 | 50.667 | 24.663 | 1.00 | 0.00 | N |
| ATOM | 5156 | HZ1  | LYS | 331 | 53.361 | 50.391 | 25.000 | 1.00 | 0.00 | H |
| ATOM | 5157 | HZ2  | LYS | 331 | 54.488 | 50.149 | 23.825 | 1.00 | 0.00 | H |
| ATOM | 5158 | HZ3  | LYS | 331 | 54.128 | 51.646 | 24.429 | 1.00 | 0.00 | H |
| ATOM | 5159 | C    | LYS | 331 | 57.350 | 47.783 | 31.017 | 1.00 | 0.00 | C |
| ATOM | 5160 | O    | LYS | 331 | 56.350 | 47.390 | 31.613 | 1.00 | 0.00 | O |
| ATOM | 5161 | N    | VAL | 332 | 58.578 | 47.328 | 31.280 | 1.00 | 0.00 | N |
| ATOM | 5162 | H    | VAL | 332 | 59.347 | 47.741 | 30.768 | 1.00 | 0.00 | H |
| ATOM | 5163 | CA   | VAL | 332 | 58.910 | 46.309 | 32.293 | 1.00 | 0.00 | C |
| ATOM | 5164 | HA   | VAL | 332 | 58.031 | 46.117 | 32.905 | 1.00 | 0.00 | H |
| ATOM | 5165 | CB   | VAL | 332 | 59.333 | 44.974 | 31.636 | 1.00 | 0.00 | C |
| ATOM | 5166 | HB   | VAL | 332 | 60.269 | 45.131 | 31.098 | 1.00 | 0.00 | H |
| ATOM | 5167 | CG1  | VAL | 332 | 59.565 | 43.875 | 32.684 | 1.00 | 0.00 | C |
| ATOM | 5168 | HG11 | VAL | 332 | 59.834 | 42.943 | 32.187 | 1.00 | 0.00 | H |
| ATOM | 5169 | HG12 | VAL | 332 | 60.387 | 44.148 | 33.346 | 1.00 | 0.00 | H |
| ATOM | 5170 | HG13 | VAL | 332 | 58.662 | 43.717 | 33.273 | 1.00 | 0.00 | H |
| ATOM | 5171 | CG2  | VAL | 332 | 58.297 | 44.456 | 30.627 | 1.00 | 0.00 | C |
| ATOM | 5172 | HG21 | VAL | 332 | 58.207 | 45.149 | 29.791 | 1.00 | 0.00 | H |
| ATOM | 5173 | HG22 | VAL | 332 | 57.325 | 44.338 | 31.102 | 1.00 | 0.00 | H |
| ATOM | 5174 | HG23 | VAL | 332 | 58.618 | 43.493 | 30.229 | 1.00 | 0.00 | H |
| ATOM | 5175 | C    | VAL | 332 | 60.015 | 46.829 | 33.214 | 1.00 | 0.00 | C |
| ATOM | 5176 | O    | VAL | 332 | 61.025 | 47.346 | 32.732 | 1.00 | 0.00 | O |
| ATOM | 5177 | N    | LEU | 333 | 59.844 | 46.687 | 34.530 | 1.00 | 0.00 | N |
| ATOM | 5178 | H    | LEU | 333 | 58.961 | 46.316 | 34.869 | 1.00 | 0.00 | H |
| ATOM | 5179 | CA   | LEU | 333 | 60.856 | 47.036 | 35.532 | 1.00 | 0.00 | C |
| ATOM | 5180 | HA   | LEU | 333 | 61.828 | 47.102 | 35.046 | 1.00 | 0.00 | H |
| ATOM | 5181 | CB   | LEU | 333 | 60.526 | 48.399 | 36.167 | 1.00 | 0.00 | C |
| ATOM | 5182 | HB2  | LEU | 333 | 59.487 | 48.379 | 36.501 | 1.00 | 0.00 | H |
| ATOM | 5183 | HB3  | LEU | 333 | 61.150 | 48.515 | 37.049 | 1.00 | 0.00 | H |
| ATOM | 5184 | CG   | LEU | 333 | 60.740 | 49.628 | 35.263 | 1.00 | 0.00 | C |
| ATOM | 5185 | HG   | LEU | 333 | 60.154 | 49.525 | 34.351 | 1.00 | 0.00 | H |
| ATOM | 5186 | CD1  | LEU | 333 | 60.267 | 50.883 | 36.001 | 1.00 | 0.00 | C |
| ATOM | 5187 | HD11 | LEU | 333 | 59.226 | 50.763 | 36.297 | 1.00 | 0.00 | H |
| ATOM | 5188 | HD12 | LEU | 333 | 60.359 | 51.750 | 35.349 | 1.00 | 0.00 | H |
| ATOM | 5189 | HD13 | LEU | 333 | 60.867 | 51.039 | 36.895 | 1.00 | 0.00 | H |
| ATOM | 5190 | CD2  | LEU | 333 | 62.209 | 49.843 | 34.887 | 1.00 | 0.00 | C |
| ATOM | 5191 | HD21 | LEU | 333 | 62.826 | 49.880 | 35.783 | 1.00 | 0.00 | H |
| ATOM | 5192 | HD22 | LEU | 333 | 62.556 | 49.025 | 34.255 | 1.00 | 0.00 | H |
| ATOM | 5193 | HD23 | LEU | 333 | 62.322 | 50.773 | 34.331 | 1.00 | 0.00 | H |
| ATOM | 5194 | C    | LEU | 333 | 60.982 | 45.950 | 36.607 | 1.00 | 0.00 | C |
| ATOM | 5195 | O    | LEU | 333 | 59.989 | 45.363 | 37.038 | 1.00 | 0.00 | O |
| ATOM | 5196 | N    | ILE | 334 | 62.208 | 45.697 | 37.069 | 1.00 | 0.00 | N |
| ATOM | 5197 | H    | ILE | 334 | 62.989 | 46.202 | 36.659 | 1.00 | 0.00 | H |

|      |      |      |     |     |        |        |        |      |      |   |
|------|------|------|-----|-----|--------|--------|--------|------|------|---|
| ATOM | 5198 | CA   | ILE | 334 | 62.500 | 44.682 | 38.093 | 1.00 | 0.00 | C |
| ATOM | 5199 | HA   | ILE | 334 | 61.569 | 44.449 | 38.609 | 1.00 | 0.00 | H |
| ATOM | 5200 | CB   | ILE | 334 | 62.994 | 43.354 | 37.459 | 1.00 | 0.00 | C |
| ATOM | 5201 | HB   | ILE | 334 | 62.983 | 42.612 | 38.256 | 1.00 | 0.00 | H |
| ATOM | 5202 | CG2  | ILE | 334 | 62.024 | 42.852 | 36.373 | 1.00 | 0.00 | C |
| ATOM | 5203 | HG21 | ILE | 334 | 60.996 | 42.935 | 36.722 | 1.00 | 0.00 | H |
| ATOM | 5204 | HG22 | ILE | 334 | 62.223 | 41.806 | 36.143 | 1.00 | 0.00 | H |
| ATOM | 5205 | HG23 | ILE | 334 | 62.134 | 43.443 | 35.463 | 1.00 | 0.00 | H |
| ATOM | 5206 | CG1  | ILE | 334 | 64.441 | 43.441 | 36.923 | 1.00 | 0.00 | C |
| ATOM | 5207 | HG12 | ILE | 334 | 64.496 | 44.227 | 36.168 | 1.00 | 0.00 | H |
| ATOM | 5208 | HG13 | ILE | 334 | 65.106 | 43.705 | 37.744 | 1.00 | 0.00 | H |
| ATOM | 5209 | CD1  | ILE | 334 | 64.979 | 42.141 | 36.308 | 1.00 | 0.00 | C |
| ATOM | 5210 | HD11 | ILE | 334 | 64.930 | 41.334 | 37.039 | 1.00 | 0.00 | H |
| ATOM | 5211 | HD12 | ILE | 334 | 66.016 | 42.290 | 36.011 | 1.00 | 0.00 | H |
| ATOM | 5212 | HD13 | ILE | 334 | 64.410 | 41.870 | 35.419 | 1.00 | 0.00 | H |
| ATOM | 5213 | C    | ILE | 334 | 63.452 | 45.228 | 39.164 | 1.00 | 0.00 | C |
| ATOM | 5214 | O    | ILE | 334 | 64.330 | 46.047 | 38.882 | 1.00 | 0.00 | O |
| ATOM | 5215 | N    | HIE | 335 | 63.280 | 44.774 | 40.407 | 1.00 | 0.00 | N |
| ATOM | 5216 | H    | HIE | 335 | 62.506 | 44.140 | 40.580 | 1.00 | 0.00 | H |
| ATOM | 5217 | CA   | HIE | 335 | 64.203 | 45.072 | 41.511 | 1.00 | 0.00 | C |
| ATOM | 5218 | HA   | HIE | 335 | 64.552 | 46.101 | 41.403 | 1.00 | 0.00 | H |
| ATOM | 5219 | CB   | HIE | 335 | 63.443 | 44.971 | 42.840 | 1.00 | 0.00 | C |
| ATOM | 5220 | HB2  | HIE | 335 | 62.640 | 45.710 | 42.844 | 1.00 | 0.00 | H |
| ATOM | 5221 | HB3  | HIE | 335 | 62.994 | 43.979 | 42.906 | 1.00 | 0.00 | H |
| ATOM | 5222 | CG   | HIE | 335 | 64.306 | 45.182 | 44.061 | 1.00 | 0.00 | C |
| ATOM | 5223 | ND1  | HIE | 335 | 64.804 | 44.160 | 44.873 | 1.00 | 0.00 | N |
| ATOM | 5224 | CE1  | HIE | 335 | 65.630 | 44.756 | 45.750 | 1.00 | 0.00 | C |
| ATOM | 5225 | HE1  | HIE | 335 | 66.181 | 44.241 | 46.529 | 1.00 | 0.00 | H |
| ATOM | 5226 | NE2  | HIE | 335 | 65.704 | 46.075 | 45.505 | 1.00 | 0.00 | N |
| ATOM | 5227 | HE2  | HIE | 335 | 66.323 | 46.729 | 45.992 | 1.00 | 0.00 | H |
| ATOM | 5228 | CD2  | HIE | 335 | 64.873 | 46.363 | 44.443 | 1.00 | 0.00 | C |
| ATOM | 5229 | HD2  | HIE | 335 | 64.747 | 47.322 | 43.956 | 1.00 | 0.00 | H |
| ATOM | 5230 | C    | HIE | 335 | 65.453 | 44.175 | 41.488 | 1.00 | 0.00 | C |
| ATOM | 5231 | O    | HIE | 335 | 65.445 | 43.084 | 40.919 | 1.00 | 0.00 | O |
| ATOM | 5232 | N    | SER | 336 | 66.520 | 44.613 | 42.162 | 1.00 | 0.00 | N |
| ATOM | 5233 | H    | SER | 336 | 66.439 | 45.527 | 42.590 | 1.00 | 0.00 | H |
| ATOM | 5234 | CA   | SER | 336 | 67.823 | 43.934 | 42.250 | 1.00 | 0.00 | C |
| ATOM | 5235 | HA   | SER | 336 | 68.300 | 43.990 | 41.272 | 1.00 | 0.00 | H |
| ATOM | 5236 | CB   | SER | 336 | 68.693 | 44.682 | 43.267 | 1.00 | 0.00 | C |
| ATOM | 5237 | HB2  | SER | 336 | 68.333 | 45.704 | 43.348 | 1.00 | 0.00 | H |
| ATOM | 5238 | HB3  | SER | 336 | 68.608 | 44.221 | 44.253 | 1.00 | 0.00 | H |
| ATOM | 5239 | OG   | SER | 336 | 70.046 | 44.710 | 42.860 | 1.00 | 0.00 | O |
| ATOM | 5240 | HG   | SER | 336 | 70.487 | 43.929 | 43.268 | 1.00 | 0.00 | H |
| ATOM | 5241 | C    | SER | 336 | 67.759 | 42.450 | 42.626 | 1.00 | 0.00 | C |
| ATOM | 5242 | O    | SER | 336 | 68.501 | 41.651 | 42.059 | 1.00 | 0.00 | O |
| ATOM | 5243 | N    | HID | 337 | 66.839 | 42.036 | 43.505 | 1.00 | 0.00 | N |
| ATOM | 5244 | H    | HID | 337 | 66.216 | 42.718 | 43.925 | 1.00 | 0.00 | H |
| ATOM | 5245 | CA   | HID | 337 | 66.663 | 40.615 | 43.845 | 1.00 | 0.00 | C |
| ATOM | 5246 | HA   | HID | 337 | 67.601 | 40.222 | 44.240 | 1.00 | 0.00 | H |
| ATOM | 5247 | CB   | HID | 337 | 65.581 | 40.478 | 44.924 | 1.00 | 0.00 | C |
| ATOM | 5248 | HB2  | HID | 337 | 64.655 | 40.925 | 44.559 | 1.00 | 0.00 | H |
| ATOM | 5249 | HB3  | HID | 337 | 65.390 | 39.418 | 45.089 | 1.00 | 0.00 | H |



|      |      |      |     |     |        |        |        |      |      |   |
|------|------|------|-----|-----|--------|--------|--------|------|------|---|
| ATOM | 5250 | CG   | HID | 337 | 65.912 | 41.090 | 46.262 | 1.00 | 0.00 | C |
| ATOM | 5251 | ND1  | HID | 337 | 65.047 | 41.158 | 47.329 | 1.00 | 0.00 | N |
| ATOM | 5252 | HD1  | HID | 337 | 64.091 | 40.802 | 47.338 | 1.00 | 0.00 | H |
| ATOM | 5253 | CE1  | HID | 337 | 65.689 | 41.738 | 48.355 | 1.00 | 0.00 | C |
| ATOM | 5254 | HE1  | HID | 337 | 65.262 | 41.923 | 49.333 | 1.00 | 0.00 | H |
| ATOM | 5255 | NE2  | HID | 337 | 66.946 | 42.047 | 48.002 | 1.00 | 0.00 | N |
| ATOM | 5256 | CD2  | HID | 337 | 67.104 | 41.624 | 46.679 | 1.00 | 0.00 | C |
| ATOM | 5257 | HD2  | HID | 337 | 68.011 | 41.705 | 46.095 | 1.00 | 0.00 | H |
| ATOM | 5258 | C    | HID | 337 | 66.298 | 39.755 | 42.623 | 1.00 | 0.00 | C |
| ATOM | 5259 | O    | HID | 337 | 66.789 | 38.637 | 42.482 | 1.00 | 0.00 | O |
| ATOM | 5260 | N    | CYS | 338 | 65.491 | 40.286 | 41.702 | 1.00 | 0.00 | N |
| ATOM | 5261 | H    | CYS | 338 | 65.175 | 41.240 | 41.819 | 1.00 | 0.00 | H |
| ATOM | 5262 | CA   | CYS | 338 | 65.112 | 39.610 | 40.460 | 1.00 | 0.00 | C |
| ATOM | 5263 | HA   | CYS | 338 | 64.780 | 38.597 | 40.694 | 1.00 | 0.00 | H |
| ATOM | 5264 | CB   | CYS | 338 | 63.945 | 40.372 | 39.824 | 1.00 | 0.00 | C |
| ATOM | 5265 | HB2  | CYS | 338 | 64.293 | 41.360 | 39.523 | 1.00 | 0.00 | H |
| ATOM | 5266 | HB3  | CYS | 338 | 63.594 | 39.836 | 38.941 | 1.00 | 0.00 | H |
| ATOM | 5267 | SG   | CYS | 338 | 62.588 | 40.538 | 41.015 | 1.00 | 0.00 | S |
| ATOM | 5268 | HG   | CYS | 338 | 61.907 | 41.503 | 40.374 | 1.00 | 0.00 | H |
| ATOM | 5269 | C    | CYS | 338 | 66.274 | 39.491 | 39.460 | 1.00 | 0.00 | C |
| ATOM | 5270 | O    | CYS | 338 | 66.208 | 38.672 | 38.551 | 1.00 | 0.00 | O |
| ATOM | 5271 | N    | VAL | 339 | 67.338 | 40.286 | 39.618 | 1.00 | 0.00 | N |
| ATOM | 5272 | H    | VAL | 339 | 67.318 | 40.964 | 40.368 | 1.00 | 0.00 | H |
| ATOM | 5273 | CA   | VAL | 339 | 68.599 | 40.111 | 38.879 | 1.00 | 0.00 | C |
| ATOM | 5274 | HA   | VAL | 339 | 68.387 | 39.682 | 37.898 | 1.00 | 0.00 | H |
| ATOM | 5275 | CB   | VAL | 339 | 69.308 | 41.465 | 38.658 | 1.00 | 0.00 | C |
| ATOM | 5276 | HB   | VAL | 339 | 69.538 | 41.913 | 39.624 | 1.00 | 0.00 | H |
| ATOM | 5277 | CG1  | VAL | 339 | 70.621 | 41.312 | 37.880 | 1.00 | 0.00 | C |
| ATOM | 5278 | HG11 | VAL | 339 | 70.432 | 40.831 | 36.919 | 1.00 | 0.00 | H |
| ATOM | 5279 | HG12 | VAL | 339 | 71.068 | 42.292 | 37.710 | 1.00 | 0.00 | H |
| ATOM | 5280 | HG13 | VAL | 339 | 71.331 | 40.709 | 38.446 | 1.00 | 0.00 | H |
| ATOM | 5281 | CG2  | VAL | 339 | 68.422 | 42.443 | 37.877 | 1.00 | 0.00 | C |
| ATOM | 5282 | HG21 | VAL | 339 | 68.169 | 42.019 | 36.906 | 1.00 | 0.00 | H |
| ATOM | 5283 | HG22 | VAL | 339 | 68.954 | 43.382 | 37.730 | 1.00 | 0.00 | H |
| ATOM | 5284 | HG23 | VAL | 339 | 67.508 | 42.656 | 38.432 | 1.00 | 0.00 | H |
| ATOM | 5285 | C    | VAL | 339 | 69.517 | 39.124 | 39.608 | 1.00 | 0.00 | C |
| ATOM | 5286 | O    | VAL | 339 | 70.054 | 38.206 | 39.001 | 1.00 | 0.00 | O |
| ATOM | 5287 | N    | GLN | 340 | 69.699 | 39.289 | 40.919 | 1.00 | 0.00 | N |
| ATOM | 5288 | H    | GLN | 340 | 69.221 | 40.061 | 41.371 | 1.00 | 0.00 | H |
| ATOM | 5289 | CA   | GLN | 340 | 70.712 | 38.561 | 41.700 | 1.00 | 0.00 | C |
| ATOM | 5290 | HA   | GLN | 340 | 71.629 | 38.515 | 41.109 | 1.00 | 0.00 | H |
| ATOM | 5291 | CB   | GLN | 340 | 71.012 | 39.362 | 42.977 | 1.00 | 0.00 | C |
| ATOM | 5292 | HB2  | GLN | 340 | 70.080 | 39.543 | 43.515 | 1.00 | 0.00 | H |
| ATOM | 5293 | HB3  | GLN | 340 | 71.676 | 38.783 | 43.620 | 1.00 | 0.00 | H |
| ATOM | 5294 | CG   | GLN | 340 | 71.688 | 40.707 | 42.647 | 1.00 | 0.00 | C |
| ATOM | 5295 | HG2  | GLN | 340 | 72.680 | 40.517 | 42.238 | 1.00 | 0.00 | H |
| ATOM | 5296 | HG3  | GLN | 340 | 71.115 | 41.246 | 41.895 | 1.00 | 0.00 | H |
| ATOM | 5297 | CD   | GLN | 340 | 71.813 | 41.608 | 43.867 | 1.00 | 0.00 | C |
| ATOM | 5298 | OE1  | GLN | 340 | 71.075 | 42.571 | 44.028 | 1.00 | 0.00 | O |
| ATOM | 5299 | NE2  | GLN | 340 | 72.745 | 41.327 | 44.748 | 1.00 | 0.00 | N |
| ATOM | 5300 | HE21 | GLN | 340 | 72.898 | 41.973 | 45.525 | 1.00 | 0.00 | H |
| ATOM | 5301 | HE22 | GLN | 340 | 73.351 | 40.540 | 44.631 | 1.00 | 0.00 | H |

|      |      |      |     |     |        |        |        |      |      |   |
|------|------|------|-----|-----|--------|--------|--------|------|------|---|
| ATOM | 5302 | C    | GLN | 340 | 70.346 | 37.099 | 42.020 | 1.00 | 0.00 | C |
| ATOM | 5303 | O    | GLN | 340 | 71.238 | 36.286 | 42.278 | 1.00 | 0.00 | O |
| ATOM | 5304 | N    | TYR | 341 | 69.057 | 36.746 | 41.978 | 1.00 | 0.00 | N |
| ATOM | 5305 | H    | TYR | 341 | 68.362 | 37.477 | 41.871 | 1.00 | 0.00 | H |
| ATOM | 5306 | CA   | TYR | 341 | 68.575 | 35.360 | 42.074 | 1.00 | 0.00 | C |
| ATOM | 5307 | HA   | TYR | 341 | 69.385 | 34.741 | 42.458 | 1.00 | 0.00 | H |
| ATOM | 5308 | CB   | TYR | 341 | 67.433 | 35.280 | 43.102 | 1.00 | 0.00 | C |
| ATOM | 5309 | HB2  | TYR | 341 | 66.574 | 35.815 | 42.697 | 1.00 | 0.00 | H |
| ATOM | 5310 | HB3  | TYR | 341 | 67.141 | 34.235 | 43.221 | 1.00 | 0.00 | H |
| ATOM | 5311 | CG   | TYR | 341 | 67.760 | 35.834 | 44.487 | 1.00 | 0.00 | C |
| ATOM | 5312 | CD1  | TYR | 341 | 68.892 | 35.377 | 45.195 | 1.00 | 0.00 | C |
| ATOM | 5313 | HD1  | TYR | 341 | 69.539 | 34.628 | 44.760 | 1.00 | 0.00 | H |
| ATOM | 5314 | CE1  | TYR | 341 | 69.190 | 35.896 | 46.472 | 1.00 | 0.00 | C |
| ATOM | 5315 | HE1  | TYR | 341 | 70.059 | 35.551 | 47.013 | 1.00 | 0.00 | H |
| ATOM | 5316 | CZ   | TYR | 341 | 68.357 | 36.876 | 47.051 | 1.00 | 0.00 | C |
| ATOM | 5317 | OH   | TYR | 341 | 68.650 | 37.387 | 48.279 | 1.00 | 0.00 | O |
| ATOM | 5318 | HH   | TYR | 341 | 68.140 | 38.181 | 48.454 | 1.00 | 0.00 | H |
| ATOM | 5319 | CE2  | TYR | 341 | 67.218 | 37.329 | 46.350 | 1.00 | 0.00 | C |
| ATOM | 5320 | HE2  | TYR | 341 | 66.572 | 38.071 | 46.794 | 1.00 | 0.00 | H |
| ATOM | 5321 | CD2  | TYR | 341 | 66.921 | 36.802 | 45.076 | 1.00 | 0.00 | C |
| ATOM | 5322 | HD2  | TYR | 341 | 66.046 | 37.142 | 44.540 | 1.00 | 0.00 | H |
| ATOM | 5323 | C    | TYR | 341 | 68.221 | 34.741 | 40.701 | 1.00 | 0.00 | C |
| ATOM | 5324 | O    | TYR | 341 | 67.648 | 33.653 | 40.639 | 1.00 | 0.00 | O |
| ATOM | 5325 | N    | LEU | 342 | 68.568 | 35.408 | 39.592 | 1.00 | 0.00 | N |
| ATOM | 5326 | H    | LEU | 342 | 69.080 | 36.276 | 39.692 | 1.00 | 0.00 | H |
| ATOM | 5327 | CA   | LEU | 342 | 68.465 | 34.870 | 38.233 | 1.00 | 0.00 | C |
| ATOM | 5328 | HA   | LEU | 342 | 67.693 | 34.102 | 38.220 | 1.00 | 0.00 | H |
| ATOM | 5329 | CB   | LEU | 342 | 68.037 | 36.009 | 37.290 | 1.00 | 0.00 | C |
| ATOM | 5330 | HB2  | LEU | 342 | 67.108 | 36.444 | 37.654 | 1.00 | 0.00 | H |
| ATOM | 5331 | HB3  | LEU | 342 | 68.803 | 36.782 | 37.328 | 1.00 | 0.00 | H |
| ATOM | 5332 | CG   | LEU | 342 | 67.854 | 35.599 | 35.821 | 1.00 | 0.00 | C |
| ATOM | 5333 | HG   | LEU | 342 | 68.730 | 35.054 | 35.470 | 1.00 | 0.00 | H |
| ATOM | 5334 | CD1  | LEU | 342 | 66.615 | 34.729 | 35.622 | 1.00 | 0.00 | C |
| ATOM | 5335 | HD11 | LEU | 342 | 66.671 | 33.848 | 36.254 | 1.00 | 0.00 | H |
| ATOM | 5336 | HD12 | LEU | 342 | 66.553 | 34.425 | 34.577 | 1.00 | 0.00 | H |
| ATOM | 5337 | HD13 | LEU | 342 | 65.722 | 35.298 | 35.879 | 1.00 | 0.00 | H |
| ATOM | 5338 | CD2  | LEU | 342 | 67.695 | 36.844 | 34.963 | 1.00 | 0.00 | C |
| ATOM | 5339 | HD21 | LEU | 342 | 66.848 | 37.435 | 35.308 | 1.00 | 0.00 | H |
| ATOM | 5340 | HD22 | LEU | 342 | 68.602 | 37.443 | 35.042 | 1.00 | 0.00 | H |
| ATOM | 5341 | HD23 | LEU | 342 | 67.547 | 36.554 | 33.924 | 1.00 | 0.00 | H |
| ATOM | 5342 | C    | LEU | 342 | 69.794 | 34.238 | 37.779 | 1.00 | 0.00 | C |
| ATOM | 5343 | O    | LEU | 342 | 70.854 | 34.839 | 37.921 | 1.00 | 0.00 | O |
| ATOM | 5344 | N    | GLY | 343 | 69.731 | 33.049 | 37.171 | 1.00 | 0.00 | N |
| ATOM | 5345 | H    | GLY | 343 | 68.838 | 32.590 | 37.131 | 1.00 | 0.00 | H |
| ATOM | 5346 | CA   | GLY | 343 | 70.879 | 32.415 | 36.501 | 1.00 | 0.00 | C |
| ATOM | 5347 | HA2  | GLY | 343 | 71.805 | 32.722 | 36.990 | 1.00 | 0.00 | H |
| ATOM | 5348 | HA3  | GLY | 343 | 70.798 | 31.334 | 36.608 | 1.00 | 0.00 | H |
| ATOM | 5349 | C    | GLY | 343 | 71.000 | 32.746 | 34.999 | 1.00 | 0.00 | C |
| ATOM | 5350 | O    | GLY | 343 | 72.066 | 33.190 | 34.564 | 1.00 | 0.00 | O |
| ATOM | 5351 | N    | PRO | 344 | 69.940 | 32.530 | 34.186 | 1.00 | 0.00 | N |
| ATOM | 5352 | CD   | PRO | 344 | 68.739 | 31.778 | 34.530 | 1.00 | 0.00 | C |
| ATOM | 5353 | HD2  | PRO | 344 | 67.994 | 32.457 | 34.938 | 1.00 | 0.00 | H |

|      |      |          |     |        |        |        |      |      |   |
|------|------|----------|-----|--------|--------|--------|------|------|---|
| ATOM | 5354 | HD3 PRO  | 344 | 68.949 | 30.976 | 35.238 | 1.00 | 0.00 | H |
| ATOM | 5355 | CG PRO   | 344 | 68.228 | 31.186 | 33.217 | 1.00 | 0.00 | C |
| ATOM | 5356 | HG2 PRO  | 344 | 67.152 | 31.019 | 33.234 | 1.00 | 0.00 | H |
| ATOM | 5357 | HG3 PRO  | 344 | 68.760 | 30.258 | 32.999 | 1.00 | 0.00 | H |
| ATOM | 5358 | CB PRO   | 344 | 68.623 | 32.258 | 32.206 | 1.00 | 0.00 | C |
| ATOM | 5359 | HB2 PRO  | 344 | 67.908 | 33.082 | 32.248 | 1.00 | 0.00 | H |
| ATOM | 5360 | HB3 PRO  | 344 | 68.691 | 31.856 | 31.194 | 1.00 | 0.00 | H |
| ATOM | 5361 | CA PRO   | 344 | 69.987 | 32.712 | 32.732 | 1.00 | 0.00 | C |
| ATOM | 5362 | HA PRO   | 344 | 70.742 | 32.022 | 32.351 | 1.00 | 0.00 | H |
| ATOM | 5363 | C PRO    | 344 | 70.341 | 34.125 | 32.243 | 1.00 | 0.00 | C |
| ATOM | 5364 | O PRO    | 344 | 69.907 | 35.138 | 32.791 | 1.00 | 0.00 | O |
| ATOM | 5365 | N LYS    | 345 | 71.109 | 34.171 | 31.150 | 1.00 | 0.00 | N |
| ATOM | 5366 | H LYS    | 345 | 71.384 | 33.285 | 30.755 | 1.00 | 0.00 | H |
| ATOM | 5367 | CA LYS   | 345 | 71.709 | 35.376 | 30.553 | 1.00 | 0.00 | C |
| ATOM | 5368 | HA LYS   | 345 | 72.127 | 35.991 | 31.353 | 1.00 | 0.00 | H |
| ATOM | 5369 | CB LYS   | 345 | 72.867 | 34.940 | 29.637 | 1.00 | 0.00 | C |
| ATOM | 5370 | HB2 LYS  | 345 | 72.498 | 34.191 | 28.933 | 1.00 | 0.00 | H |
| ATOM | 5371 | HB3 LYS  | 345 | 73.225 | 35.798 | 29.063 | 1.00 | 0.00 | H |
| ATOM | 5372 | CG LYS   | 345 | 74.049 | 34.372 | 30.441 | 1.00 | 0.00 | C |
| ATOM | 5373 | HG2 LYS  | 345 | 74.629 | 35.196 | 30.858 | 1.00 | 0.00 | H |
| ATOM | 5374 | HG3 LYS  | 345 | 73.683 | 33.756 | 31.263 | 1.00 | 0.00 | H |
| ATOM | 5375 | CD LYS   | 345 | 74.944 | 33.492 | 29.565 | 1.00 | 0.00 | C |
| ATOM | 5376 | HD2 LYS  | 345 | 74.353 | 32.644 | 29.213 | 1.00 | 0.00 | H |
| ATOM | 5377 | HD3 LYS  | 345 | 75.304 | 34.055 | 28.702 | 1.00 | 0.00 | H |
| ATOM | 5378 | CE LYS   | 345 | 76.136 | 32.985 | 30.382 | 1.00 | 0.00 | C |
| ATOM | 5379 | HE2 LYS  | 345 | 76.929 | 33.737 | 30.353 | 1.00 | 0.00 | H |
| ATOM | 5380 | HE3 LYS  | 345 | 75.825 | 32.846 | 31.423 | 1.00 | 0.00 | H |
| ATOM | 5381 | NZ LYS   | 345 | 76.621 | 31.694 | 29.851 | 1.00 | 0.00 | N |
| ATOM | 5382 | HZ1 LYS  | 345 | 76.679 | 31.712 | 28.834 | 1.00 | 0.00 | H |
| ATOM | 5383 | HZ2 LYS  | 345 | 75.996 | 30.947 | 30.145 | 1.00 | 0.00 | H |
| ATOM | 5384 | HZ3 LYS  | 345 | 77.540 | 31.458 | 30.213 | 1.00 | 0.00 | H |
| ATOM | 5385 | C LYS    | 345 | 70.688 | 36.254 | 29.813 | 1.00 | 0.00 | C |
| ATOM | 5386 | O LYS    | 345 | 70.556 | 36.197 | 28.589 | 1.00 | 0.00 | O |
| ATOM | 5387 | N ILE    | 346 | 69.979 | 37.095 | 30.562 | 1.00 | 0.00 | N |
| ATOM | 5388 | H ILE    | 346 | 70.049 | 36.983 | 31.566 | 1.00 | 0.00 | H |
| ATOM | 5389 | CA ILE   | 346 | 69.280 | 38.280 | 30.033 | 1.00 | 0.00 | C |
| ATOM | 5390 | HA ILE   | 346 | 68.874 | 38.034 | 29.051 | 1.00 | 0.00 | H |
| ATOM | 5391 | CB ILE   | 346 | 68.093 | 38.681 | 30.939 | 1.00 | 0.00 | C |
| ATOM | 5392 | HB ILE   | 346 | 67.623 | 39.558 | 30.492 | 1.00 | 0.00 | H |
| ATOM | 5393 | CG2 ILE  | 346 | 67.043 | 37.556 | 30.951 | 1.00 | 0.00 | C |
| ATOM | 5394 | HG21 ILE | 346 | 66.778 | 37.282 | 29.930 | 1.00 | 0.00 | H |
| ATOM | 5395 | HG22 ILE | 346 | 66.137 | 37.891 | 31.453 | 1.00 | 0.00 | H |
| ATOM | 5396 | HG23 ILE | 346 | 67.429 | 36.676 | 31.467 | 1.00 | 0.00 | H |
| ATOM | 5397 | CG1 ILE  | 346 | 68.560 | 39.070 | 32.360 | 1.00 | 0.00 | C |
| ATOM | 5398 | HG12 ILE | 346 | 68.932 | 38.184 | 32.870 | 1.00 | 0.00 | H |
| ATOM | 5399 | HG13 ILE | 346 | 69.387 | 39.771 | 32.289 | 1.00 | 0.00 | H |
| ATOM | 5400 | CD1 ILE  | 346 | 67.480 | 39.738 | 33.218 | 1.00 | 0.00 | C |
| ATOM | 5401 | HD11 ILE | 346 | 67.179 | 40.679 | 32.761 | 1.00 | 0.00 | H |
| ATOM | 5402 | HD12 ILE | 346 | 67.881 | 39.944 | 34.210 | 1.00 | 0.00 | H |
| ATOM | 5403 | HD13 ILE | 346 | 66.614 | 39.089 | 33.325 | 1.00 | 0.00 | H |
| ATOM | 5404 | C ILE    | 346 | 70.253 | 39.458 | 29.839 | 1.00 | 0.00 | C |
| ATOM | 5405 | O ILE    | 346 | 71.307 | 39.527 | 30.481 | 1.00 | 0.00 | O |

|      |      |      |     |     |        |        |        |      |      |   |
|------|------|------|-----|-----|--------|--------|--------|------|------|---|
| ATOM | 5406 | N    | LYS | 347 | 69.884 | 40.434 | 29.001 | 1.00 | 0.00 | N |
| ATOM | 5407 | H    | LYS | 347 | 69.011 | 40.329 | 28.501 | 1.00 | 0.00 | H |
| ATOM | 5408 | CA   | LYS | 347 | 70.581 | 41.731 | 28.887 | 1.00 | 0.00 | C |
| ATOM | 5409 | HA   | LYS | 347 | 71.648 | 41.579 | 29.058 | 1.00 | 0.00 | H |
| ATOM | 5410 | CB   | LYS | 347 | 70.427 | 42.314 | 27.465 | 1.00 | 0.00 | C |
| ATOM | 5411 | HB2  | LYS | 347 | 69.369 | 42.448 | 27.231 | 1.00 | 0.00 | H |
| ATOM | 5412 | HB3  | LYS | 347 | 70.905 | 43.295 | 27.448 | 1.00 | 0.00 | H |
| ATOM | 5413 | CG   | LYS | 347 | 71.087 | 41.438 | 26.387 | 1.00 | 0.00 | C |
| ATOM | 5414 | HG2  | LYS | 347 | 72.091 | 41.161 | 26.714 | 1.00 | 0.00 | H |
| ATOM | 5415 | HG3  | LYS | 347 | 70.499 | 40.530 | 26.247 | 1.00 | 0.00 | H |
| ATOM | 5416 | CD   | LYS | 347 | 71.198 | 42.189 | 25.051 | 1.00 | 0.00 | C |
| ATOM | 5417 | HD2  | LYS | 347 | 70.206 | 42.515 | 24.729 | 1.00 | 0.00 | H |
| ATOM | 5418 | HD3  | LYS | 347 | 71.833 | 43.067 | 25.188 | 1.00 | 0.00 | H |
| ATOM | 5419 | CE   | LYS | 347 | 71.812 | 41.278 | 23.981 | 1.00 | 0.00 | C |
| ATOM | 5420 | HE2  | LYS | 347 | 72.734 | 40.839 | 24.376 | 1.00 | 0.00 | H |
| ATOM | 5421 | HE3  | LYS | 347 | 71.115 | 40.464 | 23.764 | 1.00 | 0.00 | H |
| ATOM | 5422 | NZ   | LYS | 347 | 72.125 | 42.027 | 22.743 | 1.00 | 0.00 | N |
| ATOM | 5423 | HZ1  | LYS | 347 | 72.873 | 42.698 | 22.917 | 1.00 | 0.00 | H |
| ATOM | 5424 | HZ2  | LYS | 347 | 71.324 | 42.526 | 22.385 | 1.00 | 0.00 | H |
| ATOM | 5425 | HZ3  | LYS | 347 | 72.467 | 41.400 | 22.019 | 1.00 | 0.00 | H |
| ATOM | 5426 | C    | LYS | 347 | 70.122 | 42.713 | 29.980 | 1.00 | 0.00 | C |
| ATOM | 5427 | O    | LYS | 347 | 69.555 | 43.755 | 29.679 | 1.00 | 0.00 | O |
| ATOM | 5428 | N    | ALA | 348 | 70.332 | 42.358 | 31.251 | 1.00 | 0.00 | N |
| ATOM | 5429 | H    | ALA | 348 | 70.804 | 41.485 | 31.427 | 1.00 | 0.00 | H |
| ATOM | 5430 | CA   | ALA | 348 | 69.904 | 43.168 | 32.399 | 1.00 | 0.00 | C |
| ATOM | 5431 | HA   | ALA | 348 | 68.819 | 43.286 | 32.351 | 1.00 | 0.00 | H |
| ATOM | 5432 | CB   | ALA | 348 | 70.244 | 42.428 | 33.701 | 1.00 | 0.00 | C |
| ATOM | 5433 | HB1  | ALA | 348 | 69.932 | 43.033 | 34.554 | 1.00 | 0.00 | H |
| ATOM | 5434 | HB2  | ALA | 348 | 71.319 | 42.255 | 33.766 | 1.00 | 0.00 | H |
| ATOM | 5435 | HB3  | ALA | 348 | 69.721 | 41.477 | 33.746 | 1.00 | 0.00 | H |
| ATOM | 5436 | C    | ALA | 348 | 70.537 | 44.575 | 32.382 | 1.00 | 0.00 | C |
| ATOM | 5437 | O    | ALA | 348 | 71.735 | 44.737 | 32.625 | 1.00 | 0.00 | O |
| ATOM | 5438 | N    | ARG | 349 | 69.713 | 45.590 | 32.116 | 1.00 | 0.00 | N |
| ATOM | 5439 | H    | ARG | 349 | 68.739 | 45.356 | 31.927 | 1.00 | 0.00 | H |
| ATOM | 5440 | CA   | ARG | 349 | 70.079 | 47.007 | 32.040 | 1.00 | 0.00 | C |
| ATOM | 5441 | HA   | ARG | 349 | 71.146 | 47.090 | 31.828 | 1.00 | 0.00 | H |
| ATOM | 5442 | CB   | ARG | 349 | 69.290 | 47.611 | 30.865 | 1.00 | 0.00 | C |
| ATOM | 5443 | HB2  | ARG | 349 | 69.480 | 47.000 | 29.980 | 1.00 | 0.00 | H |
| ATOM | 5444 | HB3  | ARG | 349 | 68.222 | 47.561 | 31.079 | 1.00 | 0.00 | H |
| ATOM | 5445 | CG   | ARG | 349 | 69.670 | 49.061 | 30.540 | 1.00 | 0.00 | C |
| ATOM | 5446 | HG2  | ARG | 349 | 69.409 | 49.715 | 31.373 | 1.00 | 0.00 | H |
| ATOM | 5447 | HG3  | ARG | 349 | 70.745 | 49.115 | 30.362 | 1.00 | 0.00 | H |
| ATOM | 5448 | CD   | ARG | 349 | 68.923 | 49.515 | 29.279 | 1.00 | 0.00 | C |
| ATOM | 5449 | HD2  | ARG | 349 | 69.043 | 48.756 | 28.504 | 1.00 | 0.00 | H |
| ATOM | 5450 | HD3  | ARG | 349 | 67.859 | 49.595 | 29.497 | 1.00 | 0.00 | H |
| ATOM | 5451 | NE   | ARG | 349 | 69.458 | 50.786 | 28.762 | 1.00 | 0.00 | N |
| ATOM | 5452 | HE   | ARG | 349 | 70.352 | 50.755 | 28.288 | 1.00 | 0.00 | H |
| ATOM | 5453 | CZ   | ARG | 349 | 68.914 | 51.986 | 28.812 | 1.00 | 0.00 | C |
| ATOM | 5454 | NH1  | ARG | 349 | 67.781 | 52.254 | 29.385 | 1.00 | 0.00 | N |
| ATOM | 5455 | HH11 | ARG | 349 | 67.224 | 51.513 | 29.817 | 1.00 | 0.00 | H |
| ATOM | 5456 | HH12 | ARG | 349 | 67.420 | 53.189 | 29.369 | 1.00 | 0.00 | H |
| ATOM | 5457 | NH2  | ARG | 349 | 69.540 | 52.976 | 28.254 | 1.00 | 0.00 | N |

|      |      |      |     |     |        |        |        |      |      |   |
|------|------|------|-----|-----|--------|--------|--------|------|------|---|
| ATOM | 5458 | HH21 | ARG | 349 | 70.414 | 52.791 | 27.780 | 1.00 | 0.00 | H |
| ATOM | 5459 | HH22 | ARG | 349 | 69.114 | 53.895 | 28.271 | 1.00 | 0.00 | H |
| ATOM | 5460 | C    | ARG | 349 | 69.781 | 47.693 | 33.372 | 1.00 | 0.00 | C |
| ATOM | 5461 | O    | ARG | 349 | 68.637 | 47.725 | 33.810 | 1.00 | 0.00 | O |
| ATOM | 5462 | N    | PHE | 350 | 70.793 | 48.248 | 34.032 | 1.00 | 0.00 | N |
| ATOM | 5463 | H    | PHE | 350 | 71.712 | 48.200 | 33.625 | 1.00 | 0.00 | H |
| ATOM | 5464 | CA   | PHE | 350 | 70.593 | 49.107 | 35.205 | 1.00 | 0.00 | C |
| ATOM | 5465 | HA   | PHE | 350 | 69.895 | 48.628 | 35.894 | 1.00 | 0.00 | H |
| ATOM | 5466 | CB   | PHE | 350 | 71.938 | 49.283 | 35.925 | 1.00 | 0.00 | C |
| ATOM | 5467 | HB2  | PHE | 350 | 72.239 | 48.320 | 36.341 | 1.00 | 0.00 | H |
| ATOM | 5468 | HB3  | PHE | 350 | 72.692 | 49.569 | 35.190 | 1.00 | 0.00 | H |
| ATOM | 5469 | CG   | PHE | 350 | 71.939 | 50.314 | 37.038 | 1.00 | 0.00 | C |
| ATOM | 5470 | CD1  | PHE | 350 | 71.375 | 50.010 | 38.292 | 1.00 | 0.00 | C |
| ATOM | 5471 | HD1  | PHE | 350 | 70.912 | 49.048 | 38.460 | 1.00 | 0.00 | H |
| ATOM | 5472 | CE1  | PHE | 350 | 71.411 | 50.958 | 39.330 | 1.00 | 0.00 | C |
| ATOM | 5473 | HE1  | PHE | 350 | 70.973 | 50.721 | 40.289 | 1.00 | 0.00 | H |
| ATOM | 5474 | CZ   | PHE | 350 | 72.005 | 52.214 | 39.116 | 1.00 | 0.00 | C |
| ATOM | 5475 | HZ   | PHE | 350 | 72.040 | 52.945 | 39.912 | 1.00 | 0.00 | H |
| ATOM | 5476 | CE2  | PHE | 350 | 72.550 | 52.528 | 37.860 | 1.00 | 0.00 | C |
| ATOM | 5477 | HE2  | PHE | 350 | 73.001 | 53.497 | 37.693 | 1.00 | 0.00 | H |
| ATOM | 5478 | CD2  | PHE | 350 | 72.515 | 51.581 | 36.822 | 1.00 | 0.00 | C |
| ATOM | 5479 | HD2  | PHE | 350 | 72.933 | 51.832 | 35.856 | 1.00 | 0.00 | H |
| ATOM | 5480 | C    | PHE | 350 | 69.987 | 50.456 | 34.786 | 1.00 | 0.00 | C |
| ATOM | 5481 | O    | PHE | 350 | 70.464 | 51.060 | 33.827 | 1.00 | 0.00 | O |
| ATOM | 5482 | N    | MET | 351 | 68.968 | 50.935 | 35.510 | 1.00 | 0.00 | N |
| ATOM | 5483 | H    | MET | 351 | 68.596 | 50.360 | 36.259 | 1.00 | 0.00 | H |
| ATOM | 5484 | CA   | MET | 351 | 68.299 | 52.216 | 35.227 | 1.00 | 0.00 | C |
| ATOM | 5485 | HA   | MET | 351 | 68.839 | 52.715 | 34.422 | 1.00 | 0.00 | H |
| ATOM | 5486 | CB   | MET | 351 | 66.858 | 51.964 | 34.741 | 1.00 | 0.00 | C |
| ATOM | 5487 | HB2  | MET | 351 | 66.539 | 50.956 | 35.014 | 1.00 | 0.00 | H |
| ATOM | 5488 | HB3  | MET | 351 | 66.171 | 52.667 | 35.212 | 1.00 | 0.00 | H |
| ATOM | 5489 | CG   | MET | 351 | 66.760 | 52.126 | 33.219 | 1.00 | 0.00 | C |
| ATOM | 5490 | HG2  | MET | 351 | 67.502 | 51.476 | 32.753 | 1.00 | 0.00 | H |
| ATOM | 5491 | HG3  | MET | 351 | 65.776 | 51.785 | 32.899 | 1.00 | 0.00 | H |
| ATOM | 5492 | SD   | MET | 351 | 67.006 | 53.824 | 32.601 | 1.00 | 0.00 | S |
| ATOM | 5493 | CE   | MET | 351 | 65.422 | 54.575 | 33.063 | 1.00 | 0.00 | C |
| ATOM | 5494 | HE1  | MET | 351 | 65.311 | 54.573 | 34.147 | 1.00 | 0.00 | H |
| ATOM | 5495 | HE2  | MET | 351 | 65.385 | 55.602 | 32.700 | 1.00 | 0.00 | H |
| ATOM | 5496 | HE3  | MET | 351 | 64.604 | 54.010 | 32.613 | 1.00 | 0.00 | H |
| ATOM | 5497 | C    | MET | 351 | 68.334 | 53.221 | 36.386 | 1.00 | 0.00 | C |
| ATOM | 5498 | O    | MET | 351 | 68.223 | 54.423 | 36.132 | 1.00 | 0.00 | O |
| ATOM | 5499 | N    | GLY | 352 | 68.526 | 52.786 | 37.637 | 1.00 | 0.00 | N |
| ATOM | 5500 | H    | GLY | 352 | 68.589 | 51.791 | 37.816 | 1.00 | 0.00 | H |
| ATOM | 5501 | CA   | GLY | 352 | 68.742 | 53.711 | 38.754 | 1.00 | 0.00 | C |
| ATOM | 5502 | HA2  | GLY | 352 | 69.742 | 54.137 | 38.667 | 1.00 | 0.00 | H |
| ATOM | 5503 | HA3  | GLY | 352 | 68.024 | 54.528 | 38.677 | 1.00 | 0.00 | H |
| ATOM | 5504 | C    | GLY | 352 | 68.605 | 53.104 | 40.151 | 1.00 | 0.00 | C |
| ATOM | 5505 | O    | GLY | 352 | 68.536 | 51.887 | 40.329 | 1.00 | 0.00 | O |
| ATOM | 5506 | N    | GLN | 353 | 68.546 | 53.986 | 41.149 | 1.00 | 0.00 | N |
| ATOM | 5507 | H    | GLN | 353 | 68.601 | 54.970 | 40.924 | 1.00 | 0.00 | H |
| ATOM | 5508 | CA   | GLN | 353 | 68.164 | 53.687 | 42.532 | 1.00 | 0.00 | C |
| ATOM | 5509 | HA   | GLN | 353 | 67.747 | 52.686 | 42.578 | 1.00 | 0.00 | H |

|      |      |      |     |     |        |        |        |      |      |   |
|------|------|------|-----|-----|--------|--------|--------|------|------|---|
| ATOM | 5510 | CB   | GLN | 353 | 69.377 | 53.756 | 43.481 | 1.00 | 0.00 | C |
| ATOM | 5511 | HB2  | GLN | 353 | 69.725 | 54.788 | 43.546 | 1.00 | 0.00 | H |
| ATOM | 5512 | HB3  | GLN | 353 | 69.043 | 53.446 | 44.471 | 1.00 | 0.00 | H |
| ATOM | 5513 | CG   | GLN | 353 | 70.562 | 52.868 | 43.058 | 1.00 | 0.00 | C |
| ATOM | 5514 | HG2  | GLN | 353 | 70.207 | 51.853 | 42.894 | 1.00 | 0.00 | H |
| ATOM | 5515 | HG3  | GLN | 353 | 70.966 | 53.240 | 42.117 | 1.00 | 0.00 | H |
| ATOM | 5516 | CD   | GLN | 353 | 71.701 | 52.825 | 44.080 | 1.00 | 0.00 | C |
| ATOM | 5517 | OE1  | GLN | 353 | 71.602 | 53.247 | 45.223 | 1.00 | 0.00 | O |
| ATOM | 5518 | NE2  | GLN | 353 | 72.861 | 52.328 | 43.704 | 1.00 | 0.00 | N |
| ATOM | 5519 | HE21 | GLN | 353 | 73.608 | 52.367 | 44.379 | 1.00 | 0.00 | H |
| ATOM | 5520 | HE22 | GLN | 353 | 73.016 | 52.042 | 42.754 | 1.00 | 0.00 | H |
| ATOM | 5521 | C    | GLN | 353 | 67.082 | 54.696 | 42.946 | 1.00 | 0.00 | C |
| ATOM | 5522 | O    | GLN | 353 | 67.256 | 55.885 | 42.681 | 1.00 | 0.00 | O |
| ATOM | 5523 | N    | ILE | 354 | 65.974 | 54.246 | 43.548 | 1.00 | 0.00 | N |
| ATOM | 5524 | H    | ILE | 354 | 65.880 | 53.248 | 43.704 | 1.00 | 0.00 | H |
| ATOM | 5525 | CA   | ILE | 354 | 64.812 | 55.105 | 43.858 | 1.00 | 0.00 | C |
| ATOM | 5526 | HA   | ILE | 354 | 65.139 | 56.145 | 43.805 | 1.00 | 0.00 | H |
| ATOM | 5527 | CB   | ILE | 354 | 63.685 | 54.955 | 42.803 | 1.00 | 0.00 | C |
| ATOM | 5528 | HB   | ILE | 354 | 62.966 | 55.747 | 43.015 | 1.00 | 0.00 | H |
| ATOM | 5529 | CG2  | ILE | 354 | 64.208 | 55.203 | 41.376 | 1.00 | 0.00 | C |
| ATOM | 5530 | HG21 | ILE | 354 | 64.786 | 56.128 | 41.353 | 1.00 | 0.00 | H |
| ATOM | 5531 | HG22 | ILE | 354 | 63.375 | 55.308 | 40.683 | 1.00 | 0.00 | H |
| ATOM | 5532 | HG23 | ILE | 354 | 64.837 | 54.376 | 41.050 | 1.00 | 0.00 | H |
| ATOM | 5533 | CG1  | ILE | 354 | 62.922 | 53.612 | 42.895 | 1.00 | 0.00 | C |
| ATOM | 5534 | HG12 | ILE | 354 | 63.552 | 52.804 | 42.521 | 1.00 | 0.00 | H |
| ATOM | 5535 | HG13 | ILE | 354 | 62.678 | 53.398 | 43.934 | 1.00 | 0.00 | H |
| ATOM | 5536 | CD1  | ILE | 354 | 61.592 | 53.622 | 42.129 | 1.00 | 0.00 | C |
| ATOM | 5537 | HD11 | ILE | 354 | 60.960 | 54.433 | 42.494 | 1.00 | 0.00 | H |
| ATOM | 5538 | HD12 | ILE | 354 | 61.077 | 52.676 | 42.293 | 1.00 | 0.00 | H |
| ATOM | 5539 | HD13 | ILE | 354 | 61.761 | 53.748 | 41.061 | 1.00 | 0.00 | H |
| ATOM | 5540 | C    | ILE | 354 | 64.283 | 54.920 | 45.288 | 1.00 | 0.00 | C |
| ATOM | 5541 | O    | ILE | 354 | 64.459 | 53.869 | 45.906 | 1.00 | 0.00 | O |
| ATOM | 5542 | N    | GLU | 355 | 63.613 | 55.948 | 45.810 | 1.00 | 0.00 | N |
| ATOM | 5543 | H    | GLU | 355 | 63.577 | 56.810 | 45.274 | 1.00 | 0.00 | H |
| ATOM | 5544 | CA   | GLU | 355 | 63.004 | 55.964 | 47.148 | 1.00 | 0.00 | C |
| ATOM | 5545 | HA   | GLU | 355 | 63.500 | 55.222 | 47.776 | 1.00 | 0.00 | H |
| ATOM | 5546 | CB   | GLU | 355 | 63.204 | 57.342 | 47.803 | 1.00 | 0.00 | C |
| ATOM | 5547 | HB2  | GLU | 355 | 62.715 | 58.082 | 47.169 | 1.00 | 0.00 | H |
| ATOM | 5548 | HB3  | GLU | 355 | 62.702 | 57.358 | 48.771 | 1.00 | 0.00 | H |
| ATOM | 5549 | CG   | GLU | 355 | 64.683 | 57.711 | 48.018 | 1.00 | 0.00 | C |
| ATOM | 5550 | HG2  | GLU | 355 | 65.017 | 57.258 | 48.953 | 1.00 | 0.00 | H |
| ATOM | 5551 | HG3  | GLU | 355 | 65.297 | 57.289 | 47.221 | 1.00 | 0.00 | H |
| ATOM | 5552 | CD   | GLU | 355 | 64.938 | 59.224 | 48.033 | 1.00 | 0.00 | C |
| ATOM | 5553 | OE1  | GLU | 355 | 64.359 | 59.962 | 47.201 | 1.00 | 0.00 | O |
| ATOM | 5554 | OE2  | GLU | 355 | 65.812 | 59.678 | 48.811 | 1.00 | 0.00 | O |
| ATOM | 5555 | C    | GLU | 355 | 61.499 | 55.644 | 47.118 | 1.00 | 0.00 | C |
| ATOM | 5556 | O    | GLU | 355 | 60.759 | 56.148 | 46.266 | 1.00 | 0.00 | O |
| ATOM | 5557 | N    | ALA | 356 | 61.034 | 54.871 | 48.103 | 1.00 | 0.00 | N |
| ATOM | 5558 | H    | ALA | 356 | 61.699 | 54.493 | 48.765 | 1.00 | 0.00 | H |
| ATOM | 5559 | CA   | ALA | 356 | 59.624 | 54.630 | 48.424 | 1.00 | 0.00 | C |
| ATOM | 5560 | HA   | ALA | 356 | 59.070 | 55.566 | 48.346 | 1.00 | 0.00 | H |
| ATOM | 5561 | CB   | ALA | 356 | 59.048 | 53.612 | 47.425 | 1.00 | 0.00 | C |

|      |      |         |     |        |        |        |      |      |   |
|------|------|---------|-----|--------|--------|--------|------|------|---|
| ATOM | 5562 | HB1 ALA | 356 | 59.141 | 53.993 | 46.407 | 1.00 | 0.00 | H |
| ATOM | 5563 | HB2 ALA | 356 | 57.991 | 53.440 | 47.634 | 1.00 | 0.00 | H |
| ATOM | 5564 | HB3 ALA | 356 | 59.589 | 52.669 | 47.502 | 1.00 | 0.00 | H |
| ATOM | 5565 | C ALA   | 356 | 59.495 | 54.117 | 49.872 | 1.00 | 0.00 | C |
| ATOM | 5566 | O ALA   | 356 | 60.495 | 53.702 | 50.469 | 1.00 | 0.00 | O |
| ATOM | 5567 | N LYS   | 357 | 58.267 | 54.063 | 50.424 | 1.00 | 0.00 | N |
| ATOM | 5568 | H LYS   | 357 | 57.504 | 54.488 | 49.915 | 1.00 | 0.00 | H |
| ATOM | 5569 | CA LYS  | 357 | 58.013 | 53.558 | 51.799 | 1.00 | 0.00 | C |
| ATOM | 5570 | HA LYS  | 357 | 56.945 | 53.632 | 52.007 | 1.00 | 0.00 | H |
| ATOM | 5571 | CB LYS  | 357 | 58.408 | 52.058 | 51.776 | 1.00 | 0.00 | C |
| ATOM | 5572 | HB2 LYS | 357 | 58.582 | 51.771 | 50.737 | 1.00 | 0.00 | H |
| ATOM | 5573 | HB3 LYS | 357 | 59.361 | 51.925 | 52.285 | 1.00 | 0.00 | H |
| ATOM | 5574 | CG LYS  | 357 | 57.383 | 51.037 | 52.301 | 1.00 | 0.00 | C |
| ATOM | 5575 | HG2 LYS | 357 | 57.449 | 50.955 | 53.382 | 1.00 | 0.00 | H |
| ATOM | 5576 | HG3 LYS | 357 | 56.372 | 51.351 | 52.034 | 1.00 | 0.00 | H |
| ATOM | 5577 | CD LYS  | 357 | 57.630 | 49.639 | 51.714 | 1.00 | 0.00 | C |
| ATOM | 5578 | HD2 LYS | 357 | 57.091 | 48.920 | 52.332 | 1.00 | 0.00 | H |
| ATOM | 5579 | HD3 LYS | 357 | 57.227 | 49.597 | 50.701 | 1.00 | 0.00 | H |
| ATOM | 5580 | CE LYS  | 357 | 59.121 | 49.273 | 51.687 | 1.00 | 0.00 | C |
| ATOM | 5581 | HE2 LYS | 357 | 59.662 | 49.984 | 51.059 | 1.00 | 0.00 | H |
| ATOM | 5582 | HE3 LYS | 357 | 59.495 | 49.353 | 52.708 | 1.00 | 0.00 | H |
| ATOM | 5583 | NZ LYS  | 357 | 59.339 | 47.905 | 51.186 | 1.00 | 0.00 | N |
| ATOM | 5584 | HZ1 LYS | 357 | 60.302 | 47.613 | 51.209 | 1.00 | 0.00 | H |
| ATOM | 5585 | HZ2 LYS | 357 | 58.921 | 47.748 | 50.282 | 1.00 | 0.00 | H |
| ATOM | 5586 | HZ3 LYS | 357 | 58.835 | 47.252 | 51.800 | 1.00 | 0.00 | H |
| ATOM | 5587 | C LYS   | 357 | 58.728 | 54.489 | 52.822 | 1.00 | 0.00 | C |
| ATOM | 5588 | O LYS   | 357 | 59.003 | 55.638 | 52.479 | 1.00 | 0.00 | O |
| ATOM | 5589 | N GLY   | 358 | 59.013 | 54.162 | 54.088 | 1.00 | 0.00 | N |
| ATOM | 5590 | H GLY   | 358 | 59.446 | 54.924 | 54.590 | 1.00 | 0.00 | H |
| ATOM | 5591 | CA GLY  | 358 | 58.586 | 53.025 | 54.916 | 1.00 | 0.00 | C |
| ATOM | 5592 | HA2 GLY | 358 | 58.366 | 53.415 | 55.911 | 1.00 | 0.00 | H |
| ATOM | 5593 | HA3 GLY | 358 | 57.648 | 52.624 | 54.544 | 1.00 | 0.00 | H |
| ATOM | 5594 | C GLY   | 358 | 59.605 | 51.887 | 55.121 | 1.00 | 0.00 | C |
| ATOM | 5595 | O GLY   | 358 | 59.294 | 50.934 | 55.822 | 1.00 | 0.00 | O |
| ATOM | 5596 | N LYS   | 359 | 60.818 | 51.976 | 54.546 | 1.00 | 0.00 | N |
| ATOM | 5597 | H LYS   | 359 | 60.966 | 52.744 | 53.909 | 1.00 | 0.00 | H |
| ATOM | 5598 | CA LYS  | 359 | 61.950 | 51.053 | 54.822 | 1.00 | 0.00 | C |
| ATOM | 5599 | HA LYS  | 359 | 61.793 | 50.631 | 55.816 | 1.00 | 0.00 | H |
| ATOM | 5600 | CB LYS  | 359 | 61.983 | 49.889 | 53.798 | 1.00 | 0.00 | C |
| ATOM | 5601 | HB2 LYS | 359 | 61.552 | 50.231 | 52.857 | 1.00 | 0.00 | H |
| ATOM | 5602 | HB3 LYS | 359 | 63.014 | 49.602 | 53.581 | 1.00 | 0.00 | H |
| ATOM | 5603 | CG LYS  | 359 | 61.243 | 48.623 | 54.273 | 1.00 | 0.00 | C |
| ATOM | 5604 | HG2 LYS | 359 | 60.251 | 48.898 | 54.627 | 1.00 | 0.00 | H |
| ATOM | 5605 | HG3 LYS | 359 | 61.122 | 47.950 | 53.424 | 1.00 | 0.00 | H |
| ATOM | 5606 | CD LYS  | 359 | 61.989 | 47.856 | 55.376 | 1.00 | 0.00 | C |
| ATOM | 5607 | HD2 LYS | 359 | 62.816 | 47.290 | 54.944 | 1.00 | 0.00 | H |
| ATOM | 5608 | HD3 LYS | 359 | 62.410 | 48.560 | 56.094 | 1.00 | 0.00 | H |
| ATOM | 5609 | CE LYS  | 359 | 61.053 | 46.922 | 56.152 | 1.00 | 0.00 | C |
| ATOM | 5610 | HE2 LYS | 359 | 61.577 | 46.555 | 57.039 | 1.00 | 0.00 | H |
| ATOM | 5611 | HE3 LYS | 359 | 60.198 | 47.496 | 56.523 | 1.00 | 0.00 | H |
| ATOM | 5612 | NZ LYS  | 359 | 60.560 | 45.754 | 55.383 | 1.00 | 0.00 | N |
| ATOM | 5613 | HZ1 LYS | 359 | 61.303 | 45.145 | 55.089 | 1.00 | 0.00 | H |

|      |      |         |     |        |        |        |      |      |   |
|------|------|---------|-----|--------|--------|--------|------|------|---|
| ATOM | 5614 | HZ2 LYS | 359 | 59.975 | 45.998 | 54.584 | 1.00 | 0.00 | H |
| ATOM | 5615 | HZ3 LYS | 359 | 59.977 | 45.189 | 56.012 | 1.00 | 0.00 | H |
| ATOM | 5616 | C LYS   | 359 | 63.330 | 51.723 | 54.938 | 1.00 | 0.00 | C |
| ATOM | 5617 | O LYS   | 359 | 64.295 | 51.028 | 55.227 | 1.00 | 0.00 | O |
| ATOM | 5618 | N ALA   | 360 | 63.424 | 53.041 | 54.726 | 1.00 | 0.00 | N |
| ATOM | 5619 | H ALA   | 360 | 62.579 | 53.548 | 54.544 | 1.00 | 0.00 | H |
| ATOM | 5620 | CA ALA  | 360 | 64.657 | 53.835 | 54.855 | 1.00 | 0.00 | C |
| ATOM | 5621 | HA ALA  | 360 | 64.429 | 54.829 | 54.470 | 1.00 | 0.00 | H |
| ATOM | 5622 | CB ALA  | 360 | 64.978 | 54.008 | 56.351 | 1.00 | 0.00 | C |
| ATOM | 5623 | HB1 ALA | 360 | 65.268 | 53.050 | 56.787 | 1.00 | 0.00 | H |
| ATOM | 5624 | HB2 ALA | 360 | 64.108 | 54.399 | 56.880 | 1.00 | 0.00 | H |
| ATOM | 5625 | HB3 ALA | 360 | 65.804 | 54.708 | 56.479 | 1.00 | 0.00 | H |
| ATOM | 5626 | C ALA   | 360 | 65.863 | 53.344 | 54.006 | 1.00 | 0.00 | C |
| ATOM | 5627 | O ALA   | 360 | 67.012 | 53.646 | 54.332 | 1.00 | 0.00 | O |
| ATOM | 5628 | N GLU   | 361 | 65.618 | 52.613 | 52.914 | 1.00 | 0.00 | N |
| ATOM | 5629 | H GLU   | 361 | 64.662 | 52.449 | 52.648 | 1.00 | 0.00 | H |
| ATOM | 5630 | CA GLU  | 361 | 66.631 | 51.900 | 52.118 | 1.00 | 0.00 | C |
| ATOM | 5631 | HA GLU  | 361 | 67.614 | 52.315 | 52.337 | 1.00 | 0.00 | H |
| ATOM | 5632 | CB GLU  | 361 | 66.624 | 50.420 | 52.560 | 1.00 | 0.00 | C |
| ATOM | 5633 | HB2 GLU | 361 | 66.705 | 50.367 | 53.646 | 1.00 | 0.00 | H |
| ATOM | 5634 | HB3 GLU | 361 | 65.653 | 50.000 | 52.291 | 1.00 | 0.00 | H |
| ATOM | 5635 | CG GLU  | 361 | 67.710 | 49.515 | 51.949 | 1.00 | 0.00 | C |
| ATOM | 5636 | HG2 GLU | 361 | 67.341 | 48.487 | 51.991 | 1.00 | 0.00 | H |
| ATOM | 5637 | HG3 GLU | 361 | 67.856 | 49.760 | 50.896 | 1.00 | 0.00 | H |
| ATOM | 5638 | CD GLU  | 361 | 69.051 | 49.576 | 52.699 | 1.00 | 0.00 | C |
| ATOM | 5639 | OE1 GLU | 361 | 69.439 | 50.669 | 53.175 | 1.00 | 0.00 | O |
| ATOM | 5640 | OE2 GLU | 361 | 69.719 | 48.520 | 52.816 | 1.00 | 0.00 | O |
| ATOM | 5641 | C GLU   | 361 | 66.326 | 52.056 | 50.608 | 1.00 | 0.00 | C |
| ATOM | 5642 | O GLU   | 361 | 65.158 | 51.923 | 50.225 | 1.00 | 0.00 | O |
| ATOM | 5643 | N PRO   | 362 | 67.319 | 52.357 | 49.744 | 1.00 | 0.00 | N |
| ATOM | 5644 | CD PRO  | 362 | 68.726 | 52.563 | 50.072 | 1.00 | 0.00 | C |
| ATOM | 5645 | HD2 PRO | 362 | 69.130 | 51.736 | 50.655 | 1.00 | 0.00 | H |
| ATOM | 5646 | HD3 PRO | 362 | 68.836 | 53.498 | 50.624 | 1.00 | 0.00 | H |
| ATOM | 5647 | CG PRO  | 362 | 69.461 | 52.666 | 48.736 | 1.00 | 0.00 | C |
| ATOM | 5648 | HG2 PRO | 362 | 69.745 | 51.669 | 48.394 | 1.00 | 0.00 | H |
| ATOM | 5649 | HG3 PRO | 362 | 70.336 | 53.313 | 48.804 | 1.00 | 0.00 | H |
| ATOM | 5650 | CB PRO  | 362 | 68.394 | 53.247 | 47.810 | 1.00 | 0.00 | C |
| ATOM | 5651 | HB2 PRO | 362 | 68.598 | 53.011 | 46.765 | 1.00 | 0.00 | H |
| ATOM | 5652 | HB3 PRO | 362 | 68.339 | 54.328 | 47.951 | 1.00 | 0.00 | H |
| ATOM | 5653 | CA PRO  | 362 | 67.100 | 52.598 | 48.315 | 1.00 | 0.00 | C |
| ATOM | 5654 | HA PRO  | 362 | 66.279 | 53.304 | 48.187 | 1.00 | 0.00 | H |
| ATOM | 5655 | C PRO   | 362 | 66.772 | 51.321 | 47.524 | 1.00 | 0.00 | C |
| ATOM | 5656 | O PRO   | 362 | 67.293 | 50.234 | 47.793 | 1.00 | 0.00 | O |
| ATOM | 5657 | N LEU   | 363 | 65.938 | 51.460 | 46.490 | 1.00 | 0.00 | N |
| ATOM | 5658 | H LEU   | 363 | 65.524 | 52.375 | 46.337 | 1.00 | 0.00 | H |
| ATOM | 5659 | CA LEU  | 363 | 65.538 | 50.387 | 45.576 | 1.00 | 0.00 | C |
| ATOM | 5660 | HA LEU  | 363 | 65.733 | 49.419 | 46.033 | 1.00 | 0.00 | H |
| ATOM | 5661 | CB LEU  | 363 | 64.021 | 50.488 | 45.316 | 1.00 | 0.00 | C |
| ATOM | 5662 | HB2 LEU | 363 | 63.820 | 51.447 | 44.838 | 1.00 | 0.00 | H |
| ATOM | 5663 | HB3 LEU | 363 | 63.734 | 49.706 | 44.612 | 1.00 | 0.00 | H |
| ATOM | 5664 | CG LEU  | 363 | 63.132 | 50.382 | 46.570 | 1.00 | 0.00 | C |
| ATOM | 5665 | HG LEU  | 363 | 63.421 | 51.136 | 47.302 | 1.00 | 0.00 | H |



|      |      |          |     |        |        |        |      |      |   |
|------|------|----------|-----|--------|--------|--------|------|------|---|
| ATOM | 5666 | CD1 LEU  | 363 | 61.676 | 50.639 | 46.179 | 1.00 | 0.00 | C |
| ATOM | 5667 | HD11 LEU | 363 | 61.585 | 51.650 | 45.780 | 1.00 | 0.00 | H |
| ATOM | 5668 | HD12 LEU | 363 | 61.037 | 50.552 | 47.056 | 1.00 | 0.00 | H |
| ATOM | 5669 | HD13 LEU | 363 | 61.362 | 49.926 | 45.419 | 1.00 | 0.00 | H |
| ATOM | 5670 | CD2 LEU  | 363 | 63.223 | 48.998 | 47.219 | 1.00 | 0.00 | C |
| ATOM | 5671 | HD21 LEU | 363 | 63.003 | 48.223 | 46.486 | 1.00 | 0.00 | H |
| ATOM | 5672 | HD22 LEU | 363 | 64.227 | 48.848 | 47.616 | 1.00 | 0.00 | H |
| ATOM | 5673 | HD23 LEU | 363 | 62.520 | 48.934 | 48.047 | 1.00 | 0.00 | H |
| ATOM | 5674 | C LEU    | 363 | 66.332 | 50.456 | 44.261 | 1.00 | 0.00 | C |
| ATOM | 5675 | O LEU    | 363 | 66.033 | 51.287 | 43.404 | 1.00 | 0.00 | O |
| ATOM | 5676 | N ASN    | 364 | 67.321 | 49.575 | 44.077 | 1.00 | 0.00 | N |
| ATOM | 5677 | H ASN    | 364 | 67.558 | 48.956 | 44.843 | 1.00 | 0.00 | H |
| ATOM | 5678 | CA ASN   | 364 | 68.033 | 49.411 | 42.803 | 1.00 | 0.00 | C |
| ATOM | 5679 | HA ASN   | 364 | 68.339 | 50.396 | 42.450 | 1.00 | 0.00 | H |
| ATOM | 5680 | CB ASN   | 364 | 69.297 | 48.552 | 42.992 | 1.00 | 0.00 | C |
| ATOM | 5681 | HB2 ASN  | 364 | 69.040 | 47.633 | 43.504 | 1.00 | 0.00 | H |
| ATOM | 5682 | HB3 ASN  | 364 | 69.688 | 48.301 | 42.008 | 1.00 | 0.00 | H |
| ATOM | 5683 | CG ASN   | 364 | 70.405 | 49.213 | 43.790 | 1.00 | 0.00 | C |
| ATOM | 5684 | OD1 ASN  | 364 | 70.213 | 49.704 | 44.887 | 1.00 | 0.00 | O |
| ATOM | 5685 | ND2 ASN  | 364 | 71.611 | 49.231 | 43.272 | 1.00 | 0.00 | N |
| ATOM | 5686 | HD21 ASN | 364 | 71.810 | 48.740 | 42.416 | 1.00 | 0.00 | H |
| ATOM | 5687 | HD22 ASN | 364 | 72.330 | 49.657 | 43.831 | 1.00 | 0.00 | H |
| ATOM | 5688 | C ASN    | 364 | 67.102 | 48.803 | 41.737 | 1.00 | 0.00 | C |
| ATOM | 5689 | O ASN    | 364 | 66.402 | 47.819 | 42.004 | 1.00 | 0.00 | O |
| ATOM | 5690 | N LEU    | 365 | 67.116 | 49.382 | 40.533 | 1.00 | 0.00 | N |
| ATOM | 5691 | H LEU    | 365 | 67.760 | 50.154 | 40.390 | 1.00 | 0.00 | H |
| ATOM | 5692 | CA LEU   | 365 | 66.055 | 49.255 | 39.531 | 1.00 | 0.00 | C |
| ATOM | 5693 | HA LEU   | 365 | 65.394 | 48.434 | 39.814 | 1.00 | 0.00 | H |
| ATOM | 5694 | CB LEU   | 365 | 65.261 | 50.574 | 39.584 | 1.00 | 0.00 | C |
| ATOM | 5695 | HB2 LEU  | 365 | 64.935 | 50.737 | 40.614 | 1.00 | 0.00 | H |
| ATOM | 5696 | HB3 LEU  | 365 | 65.933 | 51.391 | 39.319 | 1.00 | 0.00 | H |
| ATOM | 5697 | CG LEU   | 365 | 64.031 | 50.651 | 38.669 | 1.00 | 0.00 | C |
| ATOM | 5698 | HG LEU   | 365 | 64.337 | 50.580 | 37.626 | 1.00 | 0.00 | H |
| ATOM | 5699 | CD1 LEU  | 365 | 63.038 | 49.534 | 38.988 | 1.00 | 0.00 | C |
| ATOM | 5700 | HD11 LEU | 365 | 63.365 | 48.602 | 38.529 | 1.00 | 0.00 | H |
| ATOM | 5701 | HD12 LEU | 365 | 62.056 | 49.793 | 38.600 | 1.00 | 0.00 | H |
| ATOM | 5702 | HD13 LEU | 365 | 62.968 | 49.396 | 40.065 | 1.00 | 0.00 | H |
| ATOM | 5703 | CD2 LEU  | 365 | 63.344 | 51.999 | 38.888 | 1.00 | 0.00 | C |
| ATOM | 5704 | HD21 LEU | 365 | 62.991 | 52.071 | 39.916 | 1.00 | 0.00 | H |
| ATOM | 5705 | HD22 LEU | 365 | 64.045 | 52.811 | 38.691 | 1.00 | 0.00 | H |
| ATOM | 5706 | HD23 LEU | 365 | 62.500 | 52.103 | 38.209 | 1.00 | 0.00 | H |
| ATOM | 5707 | C LEU    | 365 | 66.609 | 48.956 | 38.126 | 1.00 | 0.00 | C |
| ATOM | 5708 | O LEU    | 365 | 67.548 | 49.619 | 37.671 | 1.00 | 0.00 | O |
| ATOM | 5709 | N TYR    | 366 | 66.011 | 47.973 | 37.443 | 1.00 | 0.00 | N |
| ATOM | 5710 | H TYR    | 366 | 65.242 | 47.480 | 37.884 | 1.00 | 0.00 | H |
| ATOM | 5711 | CA TYR   | 366 | 66.548 | 47.365 | 36.218 | 1.00 | 0.00 | C |
| ATOM | 5712 | HA TYR   | 366 | 67.264 | 48.060 | 35.782 | 1.00 | 0.00 | H |
| ATOM | 5713 | CB TYR   | 366 | 67.307 | 46.066 | 36.562 | 1.00 | 0.00 | C |
| ATOM | 5714 | HB2 TYR  | 366 | 66.579 | 45.315 | 36.863 | 1.00 | 0.00 | H |
| ATOM | 5715 | HB3 TYR  | 366 | 67.790 | 45.693 | 35.658 | 1.00 | 0.00 | H |
| ATOM | 5716 | CG TYR   | 366 | 68.350 | 46.166 | 37.664 | 1.00 | 0.00 | C |
| ATOM | 5717 | CD1 TYR  | 366 | 69.726 | 46.230 | 37.359 | 1.00 | 0.00 | C |

|      |      |      |     |     |        |        |        |      |      |   |
|------|------|------|-----|-----|--------|--------|--------|------|------|---|
| ATOM | 5718 | HD1  | TYR | 366 | 70.049 | 46.209 | 36.327 | 1.00 | 0.00 | H |
| ATOM | 5719 | CE1  | TYR | 366 | 70.680 | 46.290 | 38.398 | 1.00 | 0.00 | C |
| ATOM | 5720 | HE1  | TYR | 366 | 71.737 | 46.314 | 38.177 | 1.00 | 0.00 | H |
| ATOM | 5721 | CZ   | TYR | 366 | 70.256 | 46.303 | 39.745 | 1.00 | 0.00 | C |
| ATOM | 5722 | OH   | TYR | 366 | 71.155 | 46.334 | 40.763 | 1.00 | 0.00 | O |
| ATOM | 5723 | HH   | TYR | 366 | 70.845 | 45.798 | 41.511 | 1.00 | 0.00 | H |
| ATOM | 5724 | CE2  | TYR | 366 | 68.882 | 46.262 | 40.042 | 1.00 | 0.00 | C |
| ATOM | 5725 | HE2  | TYR | 366 | 68.555 | 46.304 | 41.064 | 1.00 | 0.00 | H |
| ATOM | 5726 | CD2  | TYR | 366 | 67.936 | 46.159 | 39.009 | 1.00 | 0.00 | C |
| ATOM | 5727 | HD2  | TYR | 366 | 66.885 | 46.092 | 39.251 | 1.00 | 0.00 | H |
| ATOM | 5728 | C    | TYR | 366 | 65.474 | 47.099 | 35.141 | 1.00 | 0.00 | C |
| ATOM | 5729 | O    | TYR | 366 | 64.276 | 47.060 | 35.421 | 1.00 | 0.00 | O |
| ATOM | 5730 | N    | GLU | 367 | 65.946 | 46.903 | 33.911 | 1.00 | 0.00 | N |
| ATOM | 5731 | H    | GLU | 367 | 66.958 | 46.925 | 33.820 | 1.00 | 0.00 | H |
| ATOM | 5732 | CA   | GLU | 367 | 65.240 | 46.831 | 32.622 | 1.00 | 0.00 | C |
| ATOM | 5733 | HA   | GLU | 367 | 64.189 | 46.584 | 32.777 | 1.00 | 0.00 | H |
| ATOM | 5734 | CB   | GLU | 367 | 65.337 | 48.252 | 32.007 | 1.00 | 0.00 | C |
| ATOM | 5735 | HB2  | GLU | 367 | 64.741 | 48.922 | 32.628 | 1.00 | 0.00 | H |
| ATOM | 5736 | HB3  | GLU | 367 | 66.374 | 48.579 | 32.084 | 1.00 | 0.00 | H |
| ATOM | 5737 | CG   | GLU | 367 | 64.896 | 48.449 | 30.544 | 1.00 | 0.00 | C |
| ATOM | 5738 | HG2  | GLU | 367 | 65.540 | 47.853 | 29.894 | 1.00 | 0.00 | H |
| ATOM | 5739 | HG3  | GLU | 367 | 63.867 | 48.099 | 30.435 | 1.00 | 0.00 | H |
| ATOM | 5740 | CD   | GLU | 367 | 65.015 | 49.912 | 30.090 | 1.00 | 0.00 | C |
| ATOM | 5741 | OE1  | GLU | 367 | 65.917 | 50.637 | 30.575 | 1.00 | 0.00 | O |
| ATOM | 5742 | OE2  | GLU | 367 | 64.232 | 50.370 | 29.227 | 1.00 | 0.00 | O |
| ATOM | 5743 | C    | GLU | 367 | 65.875 | 45.724 | 31.736 | 1.00 | 0.00 | C |
| ATOM | 5744 | O    | GLU | 367 | 66.925 | 45.177 | 32.088 | 1.00 | 0.00 | O |
| ATOM | 5745 | N    | ILE | 368 | 65.257 | 45.380 | 30.595 | 1.00 | 0.00 | N |
| ATOM | 5746 | H    | ILE | 368 | 64.432 | 45.898 | 30.317 | 1.00 | 0.00 | H |
| ATOM | 5747 | CA   | ILE | 368 | 65.766 | 44.449 | 29.559 | 1.00 | 0.00 | C |
| ATOM | 5748 | HA   | ILE | 368 | 66.853 | 44.399 | 29.626 | 1.00 | 0.00 | H |
| ATOM | 5749 | CB   | ILE | 368 | 65.183 | 43.021 | 29.740 | 1.00 | 0.00 | C |
| ATOM | 5750 | HB   | ILE | 368 | 64.129 | 43.053 | 29.455 | 1.00 | 0.00 | H |
| ATOM | 5751 | CG2  | ILE | 368 | 65.918 | 42.053 | 28.793 | 1.00 | 0.00 | C |
| ATOM | 5752 | HG21 | ILE | 368 | 65.834 | 42.399 | 27.763 | 1.00 | 0.00 | H |
| ATOM | 5753 | HG22 | ILE | 368 | 65.474 | 41.060 | 28.835 | 1.00 | 0.00 | H |
| ATOM | 5754 | HG23 | ILE | 368 | 66.973 | 42.006 | 29.062 | 1.00 | 0.00 | H |
| ATOM | 5755 | CG1  | ILE | 368 | 65.266 | 42.506 | 31.198 | 1.00 | 0.00 | C |
| ATOM | 5756 | HG12 | ILE | 368 | 66.311 | 42.476 | 31.509 | 1.00 | 0.00 | H |
| ATOM | 5757 | HG13 | ILE | 368 | 64.739 | 43.199 | 31.853 | 1.00 | 0.00 | H |
| ATOM | 5758 | CD1  | ILE | 368 | 64.626 | 41.130 | 31.431 | 1.00 | 0.00 | C |
| ATOM | 5759 | HD11 | ILE | 368 | 63.607 | 41.123 | 31.041 | 1.00 | 0.00 | H |
| ATOM | 5760 | HD12 | ILE | 368 | 64.595 | 40.92  |        |      |      |   |
